# Supplementary material for: Identification of DNA-Methylated CpG Islands Associated With Gene Silencing in the Adult Body Tissues of the Ogye Chicken Using RNA-Seq and Reduced Representation Bisulfite Sequencing
Source: Front Genet. 2019 Apr 16;10:346. doi: 10.3389/fgene.2019.00346 (PMC6476954; doi:10.3389/fgene.2019.00346)
Supplement: Supplementary file 2 [file Data_Sheet_1.xlsx]

## Sheet: Exon.skipping.output
Data Sheet S1 The results of differentially used exons in developmental stage.
GeneID	EnsemblID	chr	strand	exonStart_0base	exonEnd	upstreamES	upstreamEE	downstreamES	downstreamEE	ID	IC_SAMPLE_1	SC_SAMPLE_1	IC_SAMPLE_2	SC_SAMPLE_2	IncFormLen	SkipFormLen	p value	FDR	IncLevel1	IncLevel2	IncLevelDifference
XLOC_000001	ENSGALT00000015891	1	+	15007	15189	14697	14799	15391	15498	4622	19	2	40	0	241	73	0.177794	1	0.742	1	-0.258
XLOC_000003	ENSGALT00000015914	1	+	57262	62304	56547	56615	63358	65309	7052	5290	0	7121	1	5089	61	1	1	1	0.988	0.012
XLOC_000003	ENSGALT00000015914	1	+	68687	68853	67270	67449	69696	69828	7054	118	1	220	0	225	73	1	1	0.975	1	-0.025
XLOC_000003	ENSGALT00000015914	1	+	69696	69828	68687	68853	70992	71151	7053	95	0	175	1	191	73	1	1	1	0.985	0.015
XLOC_000006	ENSGALT00000043996	1	+	192271	192380	183109	183181	203438	203590	865	11	1	5	0	160	65	0.769032	1	0.817	1	-0.183
XLOC_000006	ENSGALT00000043996	1	+	330078	330157	311772	311886	361705	361788	864	1	0	6	2	144	73	0.777281	1	1	0.603	0.397
XLOC_000006	ENSGALT00000043996	1	+	330081	330157	311772	311886	361705	361788	866	1	0	8	2	138	73	0.837316	1	1	0.679	0.321
XLOC_001688		1	-	444940	445020	444629	444692	445583	445689	1481	12	1	34	0	129	56	0.499791	1	0.839	1	-0.161
XLOC_000010	ENSGALT00000021988	1	+	460838	460924	460367	460504	477857	477984	2410	2	15	12	38	146	73	0.742834	1	0.063	0.136	-0.073
XLOC_000010	ENSGALT00000021988	1	+	477857	477984	460366	460504	490448	490696	2409	32	1	47	3	186	73	0.932435	1	0.926	0.86	0.066
XLOC_001692	ENSGALT00000020337	1	-	540534	540612	539907	540092	540901	540994	3030	27	2	15	1	142	73	1	1	0.874	0.885	-0.011
XLOC_001692	ENSGALT00000020337	1	-	540901	540994	540534	540612	541760	541898	3033	14	0	14	1	150	71	0.690449	1	1	0.869	0.131
XLOC_001692	ENSGALT00000020337	1	-	545302	545380	543291	543431	545863	546039	3035	18	22	13	34	142	73	0.312974	1	0.296	0.164	0.132
XLOC_000034	ENSGALT00000043140	1	+	625704	625735	625528	625596	626133	626370	2846	1	1	1	0	36	61	0.630925	1	0.629	1	-0.371
XLOC_000035		1	+	652463	652584	651500	651818	653241	653357	8085	2	0	7	1	180	73	0.829321	1	1	0.74	0.26
XLOC_000035		1	+	652991	653117	652463	652584	653241	653281	8086	1	0	3	2	145	33	0.637252	1	1	0.254	0.746
XLOC_000038	ENSGALT00000042666	1	+	714407	714590	713917	714045	715107	715506	918	73	0	201	3	242	73	1	1	1	0.953	0.047
XLOC_000041	ENSGALT00000013005	1	+	866015	866063	859765	859950	867281	867503	8255	0	2	3	16	82	73	0.820192	1	0	0.143	-0.143
XLOC_001706	ENSGALT00000013152	1	-	929245	929309	928334	928382	929747	929838	486	3	1	29	0	82	41	0.218465	1	0.6	1	-0.4
XLOC_001707		1	-	942461	942557	941817	942061	943374	943563	1735	48	0	82	3	155	73	0.801011	1	1	0.928	0.072
XLOC_001708		1	-	993497	993876	992795	992960	995048	995106	3020	21	6	47	5	416	51	0.258565	1	0.3	0.535	-0.235
XLOC_000049	ENSGALT00000043375	1	+	997731	997854	995786	996109	999448	999669	11768	0	2	1	2	182	73	0.677342	1	0	0.167	-0.167
XLOC_001711	ENSGALT00000013746	1	-	1095131	1095239	1094187	1094355	1099324	1099472	4181	610	6	853	7	167	73	1	1	0.978	0.982	-0.004
XLOC_000054	ENSGALT00000040237	1	+	1151842	1152086	1149163	1149313	1153165	1153314	11014	70	2	282	6	303	73	1	1	0.894	0.919	-0.025
XLOC_001717	ENSGALT00000013814	1	-	1777718	1777828	1767003	1767247	1779901	1780086	6624	209	4	244	0	169	73	1	1	0.958	1	-0.042
XLOC_000062	ENSGALT00000040160	1	+	3023299	3023356	3022065	3022233	3024616	3028099	6583	6	13	7	0	100	73	0.00370898	0.176476	0.252	1	-0.748
XLOC_000062	ENSGALT00000040160	1	+	3023299	3023356	3022065	3022233	3024613	3028096	6584	9	106	5	49	100	73	1	1	0.058	0.069	-0.011
XLOC_001723		1	-	3110507	3110596	3104552	3104662	3111974	3112117	6753	43	3	88	3	148	73	0.936127	1	0.876	0.935	-0.059
XLOC_000064		1	+	3307660	3307782	3305032	3305140	3310362	3311368	656	1	0	1	1	181	73	0.614307	1	1	0.287	0.713
XLOC_000070		1	+	3470397	3470568	3468914	3468979	3474805	3478178	8341	126	8	212	6	215	58	0.510811	1	0.809	0.905	-0.096
XLOC_001730		1	-	3883257	3883313	3876577	3876675	3911339	3911580	6966	4	0	12	1	98	73	0.950034	1	1	0.899	0.101
XLOC_001730		1	-	3886135	3886224	3883257	3883313	3911339	3911580	6964	11	0	15	1	124	49	0.716237	1	1	0.856	0.144
XLOC_000073	ENSGALT00000010913	1	+	4150574	4150612	4149628	4149725	4151135	4151271	9275	14	0	182	2	62	73	1	1	1	0.991	0.009
XLOC_000079		1	+	5605038	5605193	5604093	5604373	5715213	5715409	3438	5	7	11	2	214	73	0.0583957	0.842085	0.196	0.652	-0.456
XLOC_001741		1	-	6123181	6123244	6119964	6120068	6124669	6124822	3655	1	30	7	46	112	73	0.703076	1	0.021	0.09	-0.069
XLOC_001741		1	-	6127733	6127894	6126604	6126802	6132088	6132868	3654	111	1	122	2	220	73	1	1	0.974	0.953	0.021
XLOC_001748	ENSGALT00000010765	1	-	6744901	6744973	6741793	6743283	6746753	6746850	5773	1	15	0	24	130	73	1	1	0.036	0	0.036
XLOC_001750	ENSGALT00000045343	1	-	7218738	7218852	7169267	7169451	7220988	7221043	1284	0	1	10	14	148	48	0.641311	1	0	0.188	-0.188
XLOC_000098	ENSGALT00000029187	1	+	7318985	7319131	7318282	7318325	7320092	7320764	9572	45	0	223	7	168	36	0.413039	1	1	0.872	0.128
XLOC_000105	ENSGALT00000042634	1	+	8707948	8708050	8680442	8680640	8729291	8729449	1263	1	23	2	77	161	73	1	1	0.019	0.012	0.007
XLOC_000105	ENSGALT00000042634	1	+	8729291	8729449	8680442	8680640	8732818	8732881	1264	135	0	292	2	200	56	1	1	1	0.976	0.024
XLOC_000105	ENSGALT00000042634	1	+	8847414	8847557	8841646	8841714	8849081	8853852	1265	249	1	421	1	190	61	1	1	0.988	0.993	-0.005
XLOC_000108		1	+	10328734	10328839	10323206	10323365	10347319	10347398	10988	114	1	81	0	163	72	1	1	0.981	1	-0.019
XLOC_000108		1	+	10357121	10357209	10354831	10354906	10362485	10362542	10984	5	2	7	4	119	45	0.915496	1	0.486	0.398	0.088
XLOC_000108		1	+	10358435	10358492	10354831	10354906	10362485	10362542	10982	0	2	1	4	72	45	0.822903	1	0	0.135	-0.135
XLOC_000108		1	+	10376584	10376647	10376210	10376295	10377571	10377675	10989	58	0	43	1	112	73	1	1	1	0.966	0.034
XLOC_000109	ENSGALT00000039793	1	+	10477273	10477356	10471387	10471692	10483847	10484013	9716	7	17	4	22	146	73	0.649966	1	0.171	0.083	0.088
XLOC_001759		1	-	11038288	11038370	11026428	11026663	11039278	11039653	3617	13	0	17	6	146	73	0.060655	0.860123	1	0.586	0.414
XLOC_000113		1	+	12082348	12082477	12081599	12081721	12083145	12083328	7227	6	12	0	15	188	73	0.072871	0.928277	0.163	0	0.163
XLOC_000113		1	+	12166875	12166962	12165800	12165993	12168996	12169245	7229	4	6	0	11	146	73	0.0688632	0.904636	0.25	0	0.25
XLOC_001762	ENSGALT00000013567	1	-	12276556	12276721	12273173	12273375	12277357	12277779	1937	40	4	33	0	224	73	0.142749	1	0.765	1	-0.235
XLOC_000117	ENSGALT00000013557	1	+	12315338	12315421	12314477	12314566	12318046	12319044	12220	0	3	5	11	146	73	0.42192	1	0	0.185	-0.185
XLOC_000117	ENSGALT00000013557	1	+	12316483	12317955	12314477	12314566	12318046	12319019	12217	120	3	93	11	1531	73	0.0318055	0.637781	0.656	0.287	0.369
XLOC_000117	ENSGALT00000013557	1	+	12316483	12317955	12315127	12315421	12318046	12319019	12218	120	0	93	3	1531	73	0.103808	1	1	0.596	0.404
XLOC_000117	ENSGALT00000013557	1	+	12316648	12317955	12315042	12315421	12318046	12318685	12216	116	0	80	3	1366	73	0.0879068	1	1	0.588	0.412
XLOC_000118		1	+	12515114	12515168	12514391	12514474	12519083	12519209	11999	6	1	14	0	94	73	0.498225	1	0.823	1	-0.177
XLOC_001772		1	-	12847524	12847575	12835577	12835791	12848530	12848571	5824	2	8	2	23	49	34	0.740697	1	0.148	0.057	0.091
XLOC_001772		1	-	12847524	12847575	12835577	12835791	12848328	12848431	5825	1	0	2	4	88	73	0.408692	1	1	0.293	0.707
XLOC_000126	ENSGALT00000013259	1	+	13582827	13582887	13575017	13575324	13591874	13592059	6466	30	2	26	0	106	73	0.680417	1	0.912	1	-0.088
XLOC_000126	ENSGALT00000013259	1	+	13608075	13608206	13606622	13606835	13609307	13609425	6468	249	1	161	0	190	73	1	1	0.99	1	-0.01
XLOC_000126	ENSGALT00000013259	1	+	13624158	13624247	13622022	13622324	13624628	13624717	6467	73	1	45	0	148	73	1	1	0.973	1	-0.027
XLOC_000126	ENSGALT00000013259	1	+	13624348	13624469	13624158	13624247	13624628	13624720	6469	7	31	0	22	180	73	0.446376	1	0.084	0	0.084
XLOC_001778	ENSGALT00000013245	1	-	13634962	13635055	13634431	13634524	13635753	13635823	6785	0	11	3	12	142	63	0.488811	1	0	0.1	-0.1
XLOC_001783		1	-	14039940	14040081	14039667	14039802	14044974	14045094	4089	174	0	225	1	200	73	1	1	1	0.988	0.012
XLOC_001790	ENSGALT00000011599	1	-	14845459	14845599	14844032	14844161	14845896	14846041	9512	5	0	15	1	199	73	0.852566	1	1	0.846	0.154
XLOC_000145	ENSGALT00000011493	1	+	15209000	15209021	15208319	15208485	15212547	15212608	5632	2	1	2	5	14	54	0.433123	1	0.885	0.607	0.278
XLOC_000145	ENSGALT00000011493	1	+	15219391	15219520	15218678	15218789	15223126	15223263	5634	0	2	18	14	188	73	0.219028	1	0	0.333	-0.333
XLOC_000148		1	+	15499299	15499476	15498894	15499017	15500285	15501605	5352	192	0	410	3	236	73	1	1	1	0.977	0.023
XLOC_000152	ENSGALT00000021535	1	+	15781863	15781984	15769997	15770118	15789950	15790012	479	1	0	0	1	162	55	0.39569	1	1	0	1
XLOC_000152	ENSGALT00000021535	1	+	15802729	15802765	15800302	15800457	15804124	15804272	480	0	60	1	55	58	73	1	1	0	0.022	-0.022
XLOC_001801	ENSGALT00000045967	1	-	15943511	15943617	15940933	15941004	15945115	15945268	628	55	0	98	2	156	64	1	1	1	0.953	0.047
XLOC_001808	ENSGALT00000013896	1	-	18557079	18557342	18552084	18552220	18568434	18568923	6764	5	53	1	75	322	73	1	1	0.021	0.003	0.018
XLOC_001808	ENSGALT00000013896	1	-	18568434	18568923	18552084	18552220	18572161	18572422	6765	399	2	420	0	548	73	1	1	0.964	1	-0.036
XLOC_001808	ENSGALT00000013896	1	-	18568434	18568567	18552084	18552220	18572161	18572422	6766	77	2	100	0	192	73	0.698472	1	0.936	1	-0.064
XLOC_001808	ENSGALT00000013896	1	-	18568434	18568539	18552084	18552220	18572161	18572422	6767	59	2	93	0	164	73	0.720539	1	0.929	1	-0.071
XLOC_001810	ENSGALT00000013914	1	-	18656427	18656551	18651599	18651792	18657237	18657517	820	25	9	119	11	183	73	0.0352377	0.658632	0.526	0.812	-0.286
XLOC_001810	ENSGALT00000013914	1	-	18656427	18656551	18651599	18651792	18657520	18657548	821	19	0	95	1	131	21	1	1	1	0.938	0.062
XLOC_001819	ENSGALT00000014081	1	-	20087617	20087780	20086403	20086861	20088657	20088857	668	1	4	1	10	222	73	1	1	0.076	0.032	0.044
XLOC_001819	ENSGALT00000014081	1	-	20123742	20123752	20121695	20121791	20123879	20124014	667	0	4	1	8	6	73	0.675378	1	0	0.603	-0.603
XLOC_001824	ENSGALT00000021457	1	-	20288314	20288415	20287403	20287488	20289474	20289631	8881	453	1	370	0	160	73	1	1	0.995	1	-0.005
XLOC_001824	ENSGALT00000021457	1	-	20370738	20370810	20345432	20346543	20384696	20384765	8878	4	215	0	145	119	62	1	1	0.01	0	0.01
XLOC_001824	ENSGALT00000021457	1	-	20444120	20444297	20384696	20384765	20512198	20512298	8879	253	0	352	2	225	62	1	1	1	0.98	0.02
XLOC_001824	ENSGALT00000021457	1	-	20444120	20444300	20384696	20384765	20512198	20512298	8880	205	0	303	2	228	62	1	1	1	0.976	0.024
XLOC_000170	ENSGALT00000030716	1	+	21514136	21514222	21512975	21513036	21519782	21519914	885	15	2	21	4	127	54	0.941194	1	0.761	0.691	0.07
XLOC_001828	ENSGALT00000014244	1	-	21836251	21836322	21832564	21833251	21838197	21838265	470	26	1	56	1	116	61	1	1	0.932	0.967	-0.035
XLOC_000173	ENSGALT00000014337	1	+	22099573	22099750	22097992	22098163	22100396	22100645	1192	4	0	1	1	236	73	0.313437	1	1	0.236	0.764
XLOC_000175	ENSGALT00000014357	1	+	22130384	22130428	22128995	22129189	22135836	22135922	10620	31	0	134	1	74	73	1	1	1	0.992	0.008
XLOC_000175	ENSGALT00000014357	1	+	22157680	22157734	22156862	22157104	22161398	22161636	10619	149	2	198	0	94	73	1	1	0.983	1	-0.017
XLOC_000175	ENSGALT00000014357	1	+	22161398	22161636	22157680	22157734	22167327	22168143	10618	402	3	367	3	271	47	1	1	0.959	0.955	0.004
XLOC_000182	ENSGALT00000014690	1	+	23254712	23255002	23252389	23252525	23268395	23268470	4340	10	10	22	18	344	68	1	1	0.165	0.195	-0.03
XLOC_000182	ENSGALT00000014690	1	+	23275532	23275573	23272775	23272883	23276023	23276167	4341	1	52	0	39	68	73	1	1	0.02	0	0.02
XLOC_000183		1	+	23581754	23581817	23571189	23571347	23592709	23593726	3158	16	1	3	0	112	73	1	1	0.912	1	-0.088
XLOC_000184	ENSGALT00000014827	1	+	24085843	24086755	24084373	24084459	24087594	24087812	10362	33	12	26	19	971	73	0.609163	1	0.171	0.093	0.078
XLOC_000184	ENSGALT00000014827	1	+	24085843	24086446	24084373	24084459	24087594	24087666	10363	27	12	18	19	654	65	0.410262	1	0.183	0.086	0.097
XLOC_000184	ENSGALT00000014827	1	+	24085843	24086818	24084373	24084459	24087594	24087812	10366	30	12	29	19	1034	73	0.972726	1	0.15	0.097	0.053
XLOC_000184	ENSGALT00000014827	1	+	24095696	24095843	24093575	24093759	24096413	24097370	10367	14	1	50	1	206	73	0.731471	1	0.832	0.947	-0.115
XLOC_001843	ENSGALT00000015182	1	-	24360881	24361010	24357385	24357423	24362414	24363147	1797	7	1	6	0	146	31	0.567371	1	0.598	1	-0.402
XLOC_001844	ENSGALT00000044231	1	-	24621777	24621914	24621117	24621220	24622807	24622880	10537	19	7	1	19	189	66	1.60825e-05	0.00309059	0.487	0.018	0.469
XLOC_001851		1	-	25969936	25970026	25909772	25909910	26035884	26036310	7775	4	0	14	2	149	73	0.659113	1	1	0.774	0.226
XLOC_001854	ENSGALT00000015386	1	-	26939085	26939287	26936292	26936381	26959975	26960021	11542	81	0	161	1	227	39	1	1	1	0.965	0.035
XLOC_000198	ENSGALT00000038867	1	+	27176155	27176304	27174246	27174340	27178613	27178718	12842	104	2	58	0	208	73	1	1	0.948	1	-0.052
XLOC_000198	ENSGALT00000038867	1	+	27177365	27177452	27176155	27176304	27178613	27178718	12840	47	1	33	0	146	73	1	1	0.959	1	-0.041
XLOC_000198	ENSGALT00000038867	1	+	27193380	27193548	27192202	27192312	27195603	27195742	12838	14	6	9	5	227	73	0.966585	1	0.429	0.367	0.062
XLOC_000208	ENSGALT00000015615	1	+	30019890	30020042	30019204	30019314	30020650	30020834	6648	5	6	4	9	211	73	0.779224	1	0.224	0.133	0.091
XLOC_001969	ENSGALT00000015635	1	-	30043119	30043244	30039766	30039844	30043749	30044630	4086	5	7	2	56	182	71	0.0418476	0.721711	0.218	0.014	0.204
XLOC_000210		1	+	30241890	30242020	30209823	30210068	30250703	30253610	9108	8	0	117	1	189	73	1	1	1	0.978	0.022
XLOC_002020	ENSGALT00000038787	1	-	30302248	30302389	30291670	30291864	30321061	30321157	12490	413	4	688	4	200	73	1	1	0.974	0.984	-0.01
XLOC_002020	ENSGALT00000038787	1	-	30345229	30345355	30323207	30323330	30357818	30357947	12489	939	0	1035	1	185	73	1	1	1	0.998	0.002
XLOC_002020	ENSGALT00000038787	1	-	30364678	30364770	30361730	30361833	30384527	30384630	12491	412	0	772	1	151	73	1	1	1	0.997	0.003
XLOC_000214	ENSGALT00000015735	1	+	30761625	30761793	30757196	30757264	30765293	30765360	683	21	22	10	31	202	48	0.209052	1	0.185	0.071	0.114
XLOC_000214	ENSGALT00000015735	1	+	30772992	30773192	30772369	30772504	30773552	30776401	684	159	1	169	0	259	73	1	1	0.978	1	-0.022
XLOC_002026	ENSGALT00000015788	1	-	30937066	30937125	30935504	30935587	30937671	30938713	10047	24	2	20	0	104	73	0.580004	1	0.894	1	-0.106
XLOC_002031	ENSGALT00000015853	1	-	31370209	31370410	31369387	31369890	31370985	31371086	10284	12	11	10	43	260	73	0.0642773	0.87863	0.234	0.061	0.173
XLOC_000220	ENSGALT00000015894	1	+	32901429	32901513	32892533	32892595	32906601	32906746	8062	35	0	62	8	128	55	0.0583794	0.842085	1	0.769	0.231
XLOC_000220	ENSGALT00000015894	1	+	32919942	32920026	32917871	32918096	32920116	32920211	8061	43	0	59	1	146	73	1	1	1	0.967	0.033
XLOC_000221	ENSGALT00000038683	1	+	32956948	32957012	32942076	32942251	32961014	32961142	9308	37	0	121	1	114	73	1	1	1	0.987	0.013
XLOC_000221	ENSGALT00000038683	1	+	32997154	32997172	32996461	32996605	32997437	32997566	9309	2	8	2	29	22	73	0.398498	1	0.453	0.186	0.267
XLOC_002037		1	-	33127042	33127174	33116322	33116485	33176024	33176231	2785	2	3	2	26	191	73	0.340253	1	0.203	0.029	0.174
XLOC_000230	ENSGALT00000016002	1	+	33723286	33723402	33721430	33721698	33723717	33726396	7028	499	1	321	0	175	73	1	1	0.995	1	-0.005
XLOC_002042	ENSGALT00000016025	1	-	33736991	33737152	33732614	33736186	33738894	33739005	743	2770	0	4115	2	220	73	1	1	1	0.999	0.001
XLOC_000231	ENSGALT00000016033	1	+	33779008	33779070	33756194	33756359	33779499	33779565	8400	1	0	11	1	96	59	1	1	1	0.871	0.129
XLOC_000231	ENSGALT00000016033	1	+	33799733	33799790	33799328	33799535	33801032	33804505	8401	4	25	4	19	100	73	1	1	0.105	0.133	-0.028
XLOC_000232	ENSGALT00000016052	1	+	33915131	33915185	33898087	33898317	33916668	33916706	909	8	1	14	0	52	31	0.533067	1	0.827	1	-0.173
XLOC_000232	ENSGALT00000016052	1	+	33936402	33936526	33929418	33929597	33938074	33938156	907	2	4	2	16	183	73	0.59404	1	0.166	0.047	0.119
XLOC_000235	ENSGALT00000016069	1	+	34380931	34381804	34379834	34380058	34383847	34383978	846	226	0	208	1	932	73	1	1	1	0.942	0.058
XLOC_000235	ENSGALT00000016069	1	+	34380931	34382650	34379834	34380058	34383847	34383992	847	280	0	276	1	1778	73	0.887241	1	1	0.919	0.081
XLOC_002045		1	-	34400225	34400459	34394242	34394389	34403239	34403351	2031	13	1	19	3	293	73	0.731851	1	0.764	0.612	0.152
XLOC_002045		1	-	34430352	34430508	34429511	34429667	34434507	34434677	2032	4	0	7	3	215	73	0.316932	1	1	0.442	0.558
XLOC_002048		1	-	35082148	35082187	35081612	35081788	35086489	35086589	1319	5	0	9	11	64	73	0.0416799	0.720666	1	0.483	0.517
XLOC_002048		1	-	35090746	35090899	35088655	35088789	35093415	35093550	1320	39	3	54	1	212	73	0.47544	1	0.817	0.949	-0.132
XLOC_000240		1	+	35257249	35257324	35255809	35255888	35257687	35257821	2360	110	1	377	0	135	72	1	1	0.983	1	-0.017
XLOC_000240		1	+	35257687	35257821	35257249	35257324	35258641	35258691	2363	99	1	349	1	158	38	1	1	0.96	0.988	-0.028
XLOC_000240		1	+	35261088	35261344	35259898	35259989	35262453	35262611	2361	143	33	119	29	315	73	1	1	0.501	0.487	0.014
XLOC_000240		1	+	35261088	35261344	35259898	35259989	35262450	35262611	2362	143	49	119	52	315	73	0.906261	1	0.403	0.347	0.056
XLOC_000241	ENSGALT00000016192	1	+	35357855	35357948	35356113	35356618	35358914	35359030	3651	13	33	21	31	152	73	0.610236	1	0.159	0.245	-0.086
XLOC_000250	ENSGALT00000016314	1	+	35746525	35746673	35743221	35743288	35747293	35747476	1267	84	0	160	1	194	60	1	1	1	0.98	0.02
XLOC_000256	ENSGALT00000016566	1	+	36430500	36430698	36429480	36429583	36431250	36431379	12189	163	1	268	0	257	73	1	1	0.979	1	-0.021
XLOC_000256	ENSGALT00000016566	1	+	36430513	36430698	36429480	36429583	36431250	36431379	12188	117	1	165	0	244	73	1	1	0.972	1	-0.028
XLOC_000259		1	+	36680158	36680296	36668993	36669227	36698916	36698982	3593	24	0	52	1	183	59	1	1	1	0.944	0.056
XLOC_000259		1	+	36743828	36743917	36719623	36719811	36751479	36751613	3594	14	2	44	0	148	73	0.161703	1	0.775	1	-0.225
XLOC_002062	ENSGALT00000016589	1	-	37561213	37561381	37554173	37555282	37563778	37564709	5171	60	3	14	4	227	73	0.0925841	1	0.865	0.53	0.335
XLOC_002068		1	-	37993708	37993951	37987123	37987194	38004570	38004705	6183	36	51	13	76	293	64	0.062718	0.866606	0.134	0.036	0.098
XLOC_002068		1	-	38009413	38009450	38004570	38004708	38014504	38014608	6184	7	59	49	45	60	73	4.87269e-07	0.000204836	0.126	0.57	-0.444
XLOC_000266	ENSGALT00000016674	1	+	38131695	38131809	38128652	38128815	38133267	38133393	6241	2	17	1	30	173	73	1	1	0.047	0.014	0.033
XLOC_000266	ENSGALT00000016674	1	+	38131695	38131809	38128652	38128815	38132291	38132410	6242	3	16	5	2	173	73	0.0343843	0.653726	0.073	0.513	-0.44
XLOC_000266	ENSGALT00000016674	1	+	38132291	38132410	38128652	38128815	38133267	38133393	6239	21	17	9	30	178	73	0.0262467	0.571312	0.336	0.11	0.226
XLOC_000266	ENSGALT00000016674	1	+	38132291	38132410	38131695	38131809	38133267	38133393	6240	6	0	12	1	178	73	0.761144	1	1	0.831	0.169
XLOC_002070	ENSGALT00000042664	1	-	38166688	38166774	38165922	38166091	38167652	38167771	1714	4	405	0	691	146	73	1	1	0.005	0	0.005
XLOC_000267	ENSGALT00000016778	1	+	38716199	38716268	38702558	38702733	38718922	38719062	7495	56	19	33	14	124	73	0.98472	1	0.634	0.581	0.053
XLOC_000267	ENSGALT00000016778	1	+	38795611	38796100	38793380	38794086	38804885	38805046	7493	166	0	81	2	548	73	0.281492	1	1	0.844	0.156
XLOC_000267	ENSGALT00000016778	1	+	38795611	38796100	38793380	38794086	38802546	38804208	7494	138	0	76	5	548	73	0.0142032	0.399711	1	0.669	0.331
XLOC_002075	ENSGALT00000016808	1	-	39497296	39497458	39492201	39492669	39499049	39499100	5379	3	62	1	88	192	44	1	1	0.011	0.003	0.008
XLOC_002075	ENSGALT00000016808	1	-	39506674	39506691	39505267	39505409	39513119	39513185	5375	19	0	10	1	10	59	1	1	1	0.983	0.017
XLOC_002075	ENSGALT00000016808	1	-	39522814	39522991	39519985	39520076	39523444	39523606	5381	218	3	259	1	236	73	1	1	0.957	0.988	-0.031
XLOC_002075	ENSGALT00000016808	1	-	39525894	39526017	39523444	39523606	39528730	39528825	5380	194	2	242	0	182	73	1	1	0.975	1	-0.025
XLOC_002075	ENSGALT00000016808	1	-	39530176	39530293	39529599	39529815	39533643	39533753	5377	3	35	13	62	176	73	1	1	0.034	0.08	-0.046
XLOC_002075	ENSGALT00000016808	1	-	39552210	39552329	39543267	39543427	39570554	39570685	5382	221	1	302	0	178	73	1	1	0.989	1	-0.011
XLOC_000278	ENSGALT00000038401	1	+	40059131	40059377	40054114	40054259	40063247	40063436	7689	2	11	1	49	305	73	1	1	0.042	0.005	0.037
XLOC_000278	ENSGALT00000038401	1	+	40082166	40082318	40071705	40071801	40090291	40090395	7690	23	1	69	1	211	73	0.911231	1	0.888	0.96	-0.072
XLOC_000278	ENSGALT00000038401	1	+	40090291	40090395	40082166	40082318	40106847	40106943	7691	16	0	57	1	163	73	1	1	1	0.962	0.038
XLOC_002078		1	-	40136023	40136121	40133979	40134155	40136941	40137117	5129	4	2	3	0	157	73	0.395903	1	0.482	1	-0.518
XLOC_002082		1	-	41532208	41532450	41531914	41532107	41534909	41535020	4311	17	0	67	2	301	73	0.810009	1	1	0.89	0.11
XLOC_002082		1	-	41541979	41542062	41539478	41539636	41547616	41548093	4312	5	3	0	13	146	73	0.00612457	0.2409	0.455	0	0.455
XLOC_002084	ENSGALT00000045438	1	-	42037760	42037990	42009238	42012820	42038125	42038354	1823	0	11	2	14	289	73	1	1	0	0.035	-0.035
XLOC_000285		1	+	42680568	42680686	42677858	42678836	42681212	42681308	2287	33	0	106	1	177	73	1	1	1	0.978	0.022
XLOC_002088		1	-	42696694	42697348	42695448	42695583	42697872	42697996	6683	22	18	11	28	713	73	0.505927	1	0.111	0.039	0.072
XLOC_002088		1	-	42713565	42713677	42712145	42712351	42714223	42714397	6684	26	2	36	0	171	73	0.346916	1	0.847	1	-0.153
XLOC_000286		1	+	42737144	42737242	42736393	42736410	42746790	42746905	4637	0	13	10	8	94	10	0.175281	1	0	0.117	-0.117
XLOC_002089	ENSGALT00000043298	1	-	42874868	42874970	42867487	42867597	42875855	42876018	749	38	0	71	2	161	73	1	1	1	0.942	0.058
XLOC_002090	ENSGALT00000038357	1	-	43174531	43174969	43171636	43173155	43175429	43175978	5724	109	1	104	0	497	73	1	1	0.941	1	-0.059
XLOC_002092	ENSGALT00000038341	1	-	43280806	43280960	43273705	43276653	43281284	43281467	8231	2	82	3	40	213	73	1	1	0.008	0.025	-0.017
XLOC_002092	ENSGALT00000038341	1	-	43280873	43280960	43273620	43276653	43281284	43281467	8230	5	82	2	40	146	73	1	1	0.03	0.024	0.006
XLOC_000292		1	+	44122591	44122679	44116962	44117150	44142701	44142812	7852	4	2	4	5	147	73	0.571032	1	0.498	0.284	0.214
XLOC_000292		1	+	44129789	44129921	44122591	44122679	44142701	44142812	7851	0	3	13	0	191	73	0.00240389	0.131818	0	1	-1
XLOC_002103		1	-	44539919	44539974	44539736	44539802	44544020	44544148	1540	17	4	47	1	82	59	0.0980733	1	0.754	0.971	-0.217
XLOC_002103		1	-	44544020	44544148	44539919	44539974	44556770	44556863	1541	26	1	48	0	162	48	0.663977	1	0.885	1	-0.115
XLOC_002103		1	-	44553874	44553997	44544020	44544148	44556770	44556863	1542	11	12	10	13	182	73	1	1	0.269	0.236	0.033
XLOC_000298		1	+	44838445	44838598	44778470	44778776	44848616	44851472	1963	1	34	9	28	212	73	0.262939	1	0.01	0.1	-0.09
XLOC_000299	ENSGALT00000018451	1	+	44951196	44951297	44949036	44949171	44955845	44955960	678	25	1	76	0	160	73	0.787535	1	0.919	1	-0.081
XLOC_002107	ENSGALT00000030640	1	-	45015197	45015312	45013195	45013340	45018278	45018410	10009	10	2	61	0	174	73	0.0742853	0.935661	0.677	1	-0.323
XLOC_002110	ENSGALT00000018481	1	-	45215441	45215672	45212097	45212179	45221281	45221389	6271	43	22	39	20	290	73	1	1	0.33	0.329	0.001
XLOC_002110	ENSGALT00000018481	1	-	45221281	45221389	45212097	45212179	45239767	45239828	6269	22	0	32	1	148	54	0.943833	1	1	0.921	0.079
XLOC_002110	ENSGALT00000018481	1	-	45226116	45226177	45221281	45221389	45227063	45227139	6270	0	9	1	9	104	69	0.994847	1	0	0.069	-0.069
XLOC_002110	ENSGALT00000018481	1	-	45227063	45227139	45221281	45221389	45229366	45229550	6268	35	0	29	5	138	73	0.049467	0.798866	1	0.754	0.246
XLOC_002110	ENSGALT00000018481	1	-	45229366	45229550	45221281	45221389	45239767	45239828	6272	34	0	49	8	224	54	0.0264886	0.571417	1	0.596	0.404
XLOC_002116		1	-	45434345	45434464	45427169	45428545	45436058	45437573	3855	0	4	1	1	178	73	0.40153	1	0	0.291	-0.291
XLOC_002120		1	-	45665579	45665685	45664794	45664837	45666006	45666104	7292	50	0	79	1	128	36	1	1	1	0.957	0.043
XLOC_002120		1	-	45700069	45700234	45693281	45693415	45713133	45713282	7291	72	1	93	0	224	73	1	1	0.959	1	-0.041
XLOC_002120		1	-	45708840	45708879	45700069	45700234	45713133	45713282	7290	0	26	1	51	64	73	1	1	0	0.022	-0.022
XLOC_000327	ENSGALT00000038256	1	+	46505564	46505684	46500888	46500989	46505788	46505884	9113	53	4	168	5	179	73	0.623663	1	0.844	0.932	-0.088
XLOC_000327	ENSGALT00000038256	1	+	46505788	46505884	46500888	46500989	46506438	46506549	9110	47	19	122	26	155	73	0.231834	1	0.538	0.688	-0.15
XLOC_000327	ENSGALT00000038256	1	+	46506438	46506549	46500888	46500989	46507755	46507850	9111	75	3	185	14	170	73	0.838882	1	0.915	0.85	0.065
XLOC_000327	ENSGALT00000038256	1	+	46507358	46507448	46506438	46506549	46507755	46507850	9112	3	50	39	122	149	73	0.0626868	0.866606	0.029	0.135	-0.106
XLOC_000330	ENSGALT00000038231	1	+	46541379	46541485	46540668	46540866	46541757	46541941	3955	2	12	0	9	165	73	0.943172	1	0.069	0	0.069
XLOC_002123	ENSGALT00000018814	1	-	46610920	46610995	46605329	46605458	46621864	46622270	8558	0	26	1	36	136	73	1	1	0	0.015	-0.015
XLOC_002123	ENSGALT00000018814	1	-	46610920	46610992	46605329	46605458	46621864	46622044	8560	0	26	1	36	130	73	1	1	0	0.015	-0.015
XLOC_002123	ENSGALT00000018814	1	-	46697935	46698121	46627300	46627408	46728799	46728952	8559	2	0	0	2	245	73	0.137028	1	1	0	1
XLOC_002123	ENSGALT00000018814	1	-	46931361	46931658	46924217	46924293	46940169	46940367	8557	3	0	11	2	352	69	0.633042	1	1	0.519	0.481
XLOC_002125		1	-	47022085	47022279	47018503	47020008	47022990	47023229	11109	57	1	37	2	253	73	0.708859	1	0.943	0.842	0.101
XLOC_002125		1	-	47051214	47051360	47041080	47041243	47057793	47057911	11108	2	10	0	9	205	73	0.868189	1	0.066	0	0.066
XLOC_000339	ENSGALT00000019146	1	+	47681947	47682103	47678475	47678600	47684627	47684685	1730	13	4	3	7	193	51	0.0503535	0.802553	0.462	0.102	0.36
XLOC_000339	ENSGALT00000019146	1	+	47701869	47702082	47686828	47687326	47702826	47705549	1731	35	6	22	4	272	73	1	1	0.61	0.596	0.014
XLOC_000341	ENSGALT00000019157	1	+	47773007	47773292	47772645	47772740	47773972	47774081	3795	26	0	90	1	344	73	1	1	1	0.95	0.05
XLOC_000341	ENSGALT00000019157	1	+	47773123	47773292	47772645	47772740	47773972	47774081	3793	30	0	101	1	228	73	1	1	1	0.97	0.03
XLOC_000341	ENSGALT00000019157	1	+	47773176	47773292	47772645	47772740	47773972	47774081	3794	18	0	63	1	175	73	1	1	1	0.963	0.037
XLOC_002153		1	-	48770182	48770277	48766147	48766348	48772919	48773064	251	54	756	6	214	154	73	1	1	0.033	0.013	0.02
XLOC_002153		1	-	48770182	48770277	48766147	48766348	48771953	48772068	252	46	5	5	0	154	73	0.660712	1	0.813	1	-0.187
XLOC_002153		1	-	48770182	48770277	48766147	48766348	48775527	48775692	253	46	3	6	0	154	73	0.831947	1	0.879	1	-0.121
XLOC_002153		1	-	48771953	48772103	48766147	48766348	48772919	48773064	248	20	756	27	214	209	73	1	1	0.009	0.042	-0.033
XLOC_002153		1	-	48772919	48773064	48766118	48766348	48775527	48775692	249	1722	3	955	0	204	73	1	1	0.995	1	-0.005
XLOC_002153		1	-	48772919	48773064	48770182	48770277	48775527	48775692	250	974	0	742	1	204	73	1	1	1	0.996	0.004
XLOC_002153		1	-	48790335	48790555	48782780	48782864	48798637	48798743	247	4666	0	1504	5	279	73	1	1	1	0.987	0.013
XLOC_000368	ENSGALT00000019344	1	+	48999498	48999632	48997871	48998048	49000221	49000313	11934	21	116	2	164	193	73	0.325244	1	0.064	0.005	0.059
XLOC_000375		1	+	49141617	49141728	49132794	49132917	49203988	49209622	2368	11	0	15	6	170	73	0.066449	0.890311	1	0.518	0.482
XLOC_000375		1	+	49241818	49241946	49238303	49238353	49246832	49247037	2366	0	11	9	46	157	43	1	1	0	0.051	-0.051
XLOC_000375		1	+	49241851	49241946	49238303	49238353	49246832	49247030	2367	0	11	7	46	124	43	1	1	0	0.05	-0.05
XLOC_002164	ENSGALT00000019431	1	-	49295402	49295511	49294745	49294881	49296994	49297070	9471	86	1	170	1	164	69	1	1	0.973	0.986	-0.013
XLOC_002168	ENSGALT00000019444	1	-	49370225	49370407	49370003	49370075	49370593	49370678	7490	121	4	279	3	233	65	0.753836	1	0.894	0.963	-0.069
XLOC_000385		1	+	49458573	49458692	49458264	49458293	49459624	49459721	4331	20	1	62	0	127	22	0.388659	1	0.776	1	-0.224
XLOC_000385		1	+	49458575	49458692	49458262	49458293	49459624	49461238	4332	10	1	51	0	127	24	0.263273	1	0.654	1	-0.346
XLOC_002177	ENSGALT00000019537	1	-	49618439	49618505	49617381	49617504	49619286	49619521	2397	4	15	18	16	118	73	0.0656148	0.88265	0.142	0.41	-0.268
XLOC_002180		1	-	49758927	49759032	49758018	49758221	49759453	49759861	10933	1	24	0	38	164	73	1	1	0.018	0	0.018
XLOC_002182	ENSGALT00000019639	1	-	49958531	49958611	49956585	49956757	49960603	49960807	8416	10	1	24	0	146	73	0.504386	1	0.833	1	-0.167
XLOC_002182	ENSGALT00000019639	1	-	49959391	49959436	49958531	49958611	49960603	49960807	8417	8	1	12	0	76	73	0.694255	1	0.885	1	-0.115
XLOC_002184	ENSGALT00000019682	1	-	49984196	49984292	49981521	49981746	49984529	49984676	5917	138	0	87	1	155	73	1	1	1	0.976	0.024
XLOC_002184	ENSGALT00000019682	1	-	49992387	49992513	49991221	49991353	49996166	49996315	5911	92	7	100	14	185	73	0.534982	1	0.838	0.738	0.1
XLOC_002184	ENSGALT00000019682	1	-	49994788	49994959	49992387	49992513	49996166	49996315	5910	1	73	2	50	230	73	1	1	0.004	0.013	-0.009
XLOC_002184	ENSGALT00000019682	1	-	50007395	50007554	50003111	50003290	50008446	50010774	5915	118	34	131	15	218	73	0.0320503	0.637781	0.538	0.745	-0.207
XLOC_002184	ENSGALT00000019682	1	-	50008446	50010774	50003111	50003290	50015794	50016139	5909	2749	1	2089	1	2387	73	1	1	0.988	0.985	0.003
XLOC_002184	ENSGALT00000019682	1	-	50025132	50025256	50021436	50021524	50025447	50025577	5914	1	2	1	4	183	73	0.955512	1	0.166	0.091	0.075
XLOC_002184	ENSGALT00000019682	1	-	50066542	50066610	50021436	50021524	50084677	50084767	5912	39	5	60	14	122	73	0.58458	1	0.824	0.719	0.105
XLOC_000417		1	+	50449020	50449118	50448546	50448847	50450055	50450814	7770	36	0	150	1	157	73	1	1	1	0.986	0.014
XLOC_000417		1	+	50449022	50449118	50448706	50448847	50450055	50450731	7771	15	0	88	1	155	73	1	1	1	0.976	0.024
XLOC_000418	ENSGALT00000030605	1	+	50551228	50551364	50550183	50550352	50552115	50552302	3146	2418	1	4020	0	195	73	1	1	0.999	1	-0.001
XLOC_002197	ENSGALT00000030604	1	-	50676331	50676373	50673944	50675910	50677454	50677652	10742	4	16	3	19	70	73	0.927811	1	0.207	0.141	0.066
XLOC_000428	ENSGALT00000020002	1	+	50745818	50747291	50745596	50745656	50749851	50750091	12634	1303	93	546	138	1512	53	1.33116e-11	1.27905e-08	0.329	0.122	0.207
XLOC_000433		1	+	50844368	50844472	50840153	50840490	50844887	50844984	9349	5	3	0	7	163	73	0.025279	0.555402	0.427	0	0.427
XLOC_000433		1	+	50844368	50844484	50840302	50840490	50844887	50844984	9350	5	3	1	7	175	73	0.0974744	1	0.41	0.056	0.354
XLOC_000438	ENSGALT00000020100	1	+	50965804	50965852	50965330	50965402	50965975	50966160	11642	8	1	41	3	74	65	1	1	0.875	0.923	-0.048
XLOC_000454	ENSGALT00000042940	1	+	51476555	51476616	51476321	51476401	51477460	51477520	10889	1	3	0	11	88	53	0.505667	1	0.167	0	0.167
XLOC_000456	ENSGALT00000020470	1	+	51566974	51567141	51565963	51566233	51567786	51568020	10327	40	1	58	0	226	73	0.988716	1	0.928	1	-0.072
XLOC_000457		1	+	51612769	51613122	51598324	51598580	51617578	51617735	7080	5372	2	2808	0	412	73	1	1	0.998	1	-0.002
XLOC_000457		1	+	51635917	51636061	51634968	51635067	51638240	51638336	7081	3293	2	1907	0	203	73	1	1	0.998	1	-0.002
XLOC_000458	ENSGALT00000020480	1	+	51763477	51763608	51759798	51759826	51782859	51783084	5881	10	7	10	13	138	21	0.792198	1	0.179	0.105	0.074
XLOC_000458	ENSGALT00000020480	1	+	51818454	51818508	51816036	51816097	51818642	51818735	5882	17	3	37	4	75	54	0.915162	1	0.803	0.869	-0.066
XLOC_000458	ENSGALT00000020480	1	+	51825226	51825266	51819795	51819928	51833029	51833118	5883	11	4	22	2	66	73	0.328398	1	0.753	0.924	-0.171
XLOC_002247		1	-	51965876	51965939	51964220	51964280	51966382	51966458	10956	1	4	0	12	88	49	0.641208	1	0.122	0	0.122
XLOC_002247		1	-	51994422	51994526	51993097	51993173	51995118	51995224	10955	9	0	30	1	159	69	1	1	1	0.929	0.071
XLOC_002247		1	-	51995118	51995224	51994399	51994526	51997308	51997843	10954	11	0	28	1	165	73	1	1	1	0.925	0.075
XLOC_002261		1	-	53561329	53561571	53558915	53559067	53561740	53561881	5006	166	1	250	0	301	73	1	1	0.976	1	-0.024
XLOC_002261		1	-	53561329	53561641	53558915	53559067	53561740	53561881	5007	286	1	422	0	371	73	1	1	0.983	1	-0.017
XLOC_002262	ENSGALT00000020629	1	-	53604753	53604823	53597858	53600460	53608018	53608152	1315	50	0	227	1	126	73	1	1	1	0.992	0.008
XLOC_002262	ENSGALT00000020629	1	-	53607232	53607341	53604753	53604823	53608018	53608152	1316	1	28	2	138	158	63	1	1	0.014	0.006	0.008
XLOC_002266	ENSGALT00000037684	1	-	53846689	53846843	53844570	53845487	53847403	53847576	6279	74	1	54	0	213	73	1	1	0.962	1	-0.038
XLOC_002272		1	-	54768784	54768894	54766478	54766601	54781233	54781308	5223	12	3	57	7	164	68	0.586014	1	0.624	0.771	-0.147
XLOC_000476		1	+	54797108	54797258	54794630	54795786	54797720	54797832	4831	15	1	9	1	209	73	0.946571	1	0.84	0.759	0.081
XLOC_000476		1	+	54797720	54797832	54792288	54792337	54799246	54799340	4830	8	14	10	65	140	42	0.323457	1	0.146	0.044	0.102
XLOC_002274	ENSGALT00000020764	1	-	54822311	54822844	54821418	54821556	54824027	54824228	11236	92	5	102	1	592	73	0.186445	1	0.694	0.926	-0.232
XLOC_002274	ENSGALT00000020764	1	-	54822311	54822358	54821418	54821556	54822773	54822844	11237	3	10	0	15	71	64	0.152331	1	0.213	0	0.213
XLOC_002274	ENSGALT00000020764	1	-	54822773	54822844	54821418	54821556	54824027	54824228	11238	25	5	33	1	128	73	0.168496	1	0.74	0.95	-0.21
XLOC_002276		1	-	54871726	54871882	54871099	54871198	54871982	54872061	302	5366	0	5938	1	214	72	1	1	1	0.999	0.001
XLOC_002277	ENSGALT00000020806	1	-	54961041	54961119	54960753	54960846	54962008	54962123	12435	5	0	8	1	142	73	0.698214	1	1	0.804	0.196
XLOC_000485	ENSGALT00000020822	1	+	55613631	55613834	55611716	55611781	55614951	55617009	7636	3	25	0	39	247	58	1	1	0.027	0	0.027
XLOC_000486	ENSGALT00000020826	1	+	55679085	55679225	55675191	55675277	55681136	55681178	158	46	0	121	1	161	35	1	1	1	0.963	0.037
XLOC_000486	ENSGALT00000020826	1	+	55679105	55679225	55675191	55675277	55681136	55681178	157	115	0	230	1	141	35	1	1	1	0.983	0.017
XLOC_000486	ENSGALT00000020826	1	+	55706193	55706292	55705059	55705145	55708055	55708223	161	294	1	192	3	158	73	1	1	0.993	0.967	0.026
XLOC_000486	ENSGALT00000020826	1	+	55709853	55709911	55709207	55709298	55710399	55710427	162	29	9	56	30	51	21	0.444361	1	0.57	0.435	0.135
XLOC_000488	ENSGALT00000020831	1	+	55713962	55714107	55712252	55712280	55715688	55715764	4939	5	0	1	4	148	17	0.0342325	0.653726	1	0.028	0.972
XLOC_002281		1	-	55723741	55723795	55722529	55723057	55725970	55726081	7067	7	4	8	22	94	73	0.0814562	0.985977	0.576	0.22	0.356
XLOC_000490	ENSGALT00000020864	1	+	55897693	55897842	55896863	55896994	55898608	55900907	462	216	0	358	2	208	73	1	1	1	0.984	0.016
XLOC_000492	ENSGALT00000020873	1	+	56280678	56280858	56279814	56279957	56283557	56283839	1407	73	1	40	0	239	73	1	1	0.957	1	-0.043
XLOC_000492	ENSGALT00000020873	1	+	56280761	56280858	56279814	56279957	56283557	56283839	1408	24	1	17	0	156	73	0.923606	1	0.918	1	-0.082
XLOC_002286	ENSGALT00000020916	1	-	56540221	56540294	56538229	56538398	56541486	56541625	8475	75	1	285	0	132	73	1	1	0.976	1	-0.024
XLOC_002286	ENSGALT00000020916	1	-	56556066	56556181	56555239	56555386	56558122	56558239	8472	123	0	237	1	174	73	1	1	1	0.99	0.01
XLOC_000497		1	+	56721689	56721806	56717017	56717231	56726597	56726675	10413	18	0	193	2	174	71	1	1	1	0.975	0.025
XLOC_002290	ENSGALT00000020949	1	-	56794307	56794411	56792402	56792499	56795144	56795268	10258	0	1	5	0	163	73	0.157551	1	0	1	-1
XLOC_002294		1	-	56998323	56998472	56990515	56990693	57002427	57002568	12923	32	0	43	1	208	73	1	1	1	0.938	0.062
XLOC_000503	ENSGALT00000020977	1	+	57047880	57048106	57046436	57046532	57048285	57048537	12971	11	2	9	2	285	73	1	1	0.585	0.535	0.05
XLOC_002297		1	-	57097760	57097880	57094966	57095103	57099294	57099331	9575	5	21	0	21	136	30	1	1	0.05	0	0.05
XLOC_002297		1	-	57138221	57138334	57127531	57127795	57138453	57138555	9576	1	40	0	46	172	73	1	1	0.01	0	0.01
XLOC_000507		1	+	57432998	57433038	57416702	57417021	57436084	57436164	4477	1	1	8	2	66	73	0.58913	1	0.525	0.816	-0.291
XLOC_000510	ENSGALT00000021004	1	+	57560880	57561062	57558994	57559082	57561769	57561916	12710	305	1	200	0	241	73	1	1	0.989	1	-0.011
XLOC_000510	ENSGALT00000021004	1	+	57560883	57561062	57558994	57559082	57561769	57561916	12711	244	1	162	0	238	73	1	1	0.987	1	-0.013
XLOC_000510	ENSGALT00000021004	1	+	57563611	57563670	57561769	57561916	57565046	57565115	12713	61	0	166	2	93	62	1	1	1	0.982	0.018
XLOC_000510	ENSGALT00000021004	1	+	57565046	57565115	57561769	57561916	57572120	57572220	12712	44	0	51	1	124	73	1	1	1	0.968	0.032
XLOC_000518	ENSGALT00000021056	1	+	58803646	58804004	58790832	58791830	58809006	58809620	9216	39	1	50	1	417	73	1	1	0.872	0.897	-0.025
XLOC_000518	ENSGALT00000021056	1	+	58809006	58809571	58790832	58791830	58819693	58819814	9217	83	1	95	0	624	73	0.802817	1	0.907	1	-0.093
XLOC_000518	ENSGALT00000021056	1	+	58812249	58812436	58808422	58809571	58819693	58819814	9218	2	10	9	8	246	73	0.150117	1	0.056	0.25	-0.194
XLOC_002306		1	-	59073429	59073507	59071057	59071225	59074616	59074673	7484	0	7	3	14	119	50	0.70511	1	0	0.083	-0.083
XLOC_002309		1	-	59452690	59458098	59451583	59451658	59487994	59488131	4991	3899	0	7426	1	5462	68	1	1	1	0.989	0.011
XLOC_002309		1	-	59461848	59461972	59454269	59458098	59478342	59478441	4992	1	2	46	47	183	73	0.805118	1	0.166	0.281	-0.115
XLOC_000568	ENSGALT00000021103	1	+	59528806	59528939	59522890	59523189	59532227	59532372	10351	19	0	75	1	192	73	1	1	1	0.966	0.034
XLOC_000569	ENSGALT00000021113	1	+	59607019	59607085	59564531	59564998	59612853	59612963	9036	4	5	0	15	118	73	0.0263333	0.571348	0.331	0	0.331
XLOC_000569	ENSGALT00000021113	1	+	59650748	59650859	59649652	59649746	59652725	59652857	9035	1	18	0	37	170	73	1	1	0.023	0	0.023
XLOC_000570		1	+	59697577	59697677	59695440	59695705	59698703	59698830	1348	7	0	87	1	159	73	1	1	1	0.976	0.024
XLOC_000572		1	+	59732984	59733028	59732359	59732521	59734393	59735281	3887	10	0	97	1	74	73	1	1	1	0.99	0.01
XLOC_000572		1	+	59734393	59735236	59732846	59733028	59739193	59739325	3890	43	0	539	3	902	73	1	1	1	0.936	0.064
XLOC_000572		1	+	59736097	59736139	59734393	59735236	59739193	59739325	3889	0	6	5	40	70	73	0.665954	1	0	0.115	-0.115
XLOC_000572		1	+	59740277	59740333	59739517	59739605	59740907	59741018	3888	8	0	121	1	98	73	1	1	1	0.989	0.011
XLOC_000574		1	+	59858599	59858673	59856507	59856886	59860318	59860495	6331	56	2	104	0	134	73	1	1	0.938	1	-0.062
XLOC_000574		1	+	59914900	59915090	59903312	59903416	59941829	59941994	6332	44	1	96	0	249	73	0.818059	1	0.928	1	-0.072
XLOC_000574		1	+	59929229	59929351	59914900	59915090	59941829	59941994	6335	45	2	99	0	181	73	0.589794	1	0.901	1	-0.099
XLOC_000574		1	+	59974980	59975089	59966985	59967129	59980482	59980585	6334	45	1	86	0	168	73	1	1	0.951	1	-0.049
XLOC_000576	ENSGALT00000021158	1	+	60067378	60067466	60066738	60066846	60067957	60068160	8798	7	0	29	2	147	73	0.795123	1	1	0.878	0.122
XLOC_000581	ENSGALT00000021209	1	+	60641532	60642006	60640333	60640483	60643170	60643452	2347	35	32	38	51	533	73	1	1	0.13	0.093	0.037
XLOC_000581	ENSGALT00000021209	1	+	60653597	60653681	60649106	60650536	60657041	60657128	2345	28	11	30	2	146	73	0.0416746	0.720666	0.56	0.882	-0.322
XLOC_000581	ENSGALT00000021209	1	+	60664738	60664810	60663271	60663466	60670482	60670670	2348	1	64	0	57	130	73	1	1	0.009	0	0.009
XLOC_000582		1	+	60739650	60739776	60698478	60699312	60754192	60754609	8525	1	69	0	37	185	73	1	1	0.006	0	0.006
XLOC_000582		1	+	60773381	60773465	60771467	60771623	60775449	60775617	8530	37	6	49	7	146	73	1	1	0.755	0.778	-0.023
XLOC_000582		1	+	60948004	60948071	60946342	60946444	60961870	60962059	8529	3	32	2	37	120	73	1	1	0.054	0.032	0.022
XLOC_000584		1	+	61103302	61103489	61102495	61102667	61104544	61104732	12718	269	1	286	0	246	73	1	1	0.988	1	-0.012
XLOC_002324	ENSGALT00000021246	1	-	61265686	61265753	61263352	61263488	61283924	61284052	12917	13	4	12	0	120	73	0.117519	1	0.664	1	-0.336
XLOC_000587	ENSGALT00000021261	1	+	61596082	61596664	61574251	61574448	61603128	61603301	12247	115	2	82	4	641	73	0.432009	1	0.868	0.7	0.168
XLOC_000587	ENSGALT00000021261	1	+	61596082	61596186	61574251	61574448	61603128	61603301	12248	28	2	10	4	163	73	0.134188	1	0.862	0.528	0.334
XLOC_000587	ENSGALT00000021261	1	+	61596082	61596186	61574251	61574448	61596560	61596664	12249	15	36	0	26	163	73	0.0105089	0.327433	0.157	0	0.157
XLOC_000587	ENSGALT00000021261	1	+	61596560	61596664	61574251	61574448	61603128	61603301	12244	88	2	74	4	163	73	0.920514	1	0.952	0.892	0.06
XLOC_000587	ENSGALT00000021261	1	+	61596560	61596664	61596082	61596186	61603128	61603301	12245	54	15	48	10	163	73	0.894953	1	0.617	0.683	-0.066
XLOC_000587	ENSGALT00000021261	1	+	61692176	61692260	61674547	61674658	61692891	61692975	12246	2	31	1	15	146	73	1	1	0.031	0.032	-0.001
XLOC_000587	ENSGALT00000021261	1	+	61713102	61713135	61692891	61692975	61716258	61716387	12240	0	4	1	7	52	73	0.743695	1	0	0.167	-0.167
XLOC_000587	ENSGALT00000021261	1	+	61735830	61735959	61733244	61733597	61736608	61736718	12242	7	6	24	1	188	73	0.00668209	0.255362	0.312	0.903	-0.591
XLOC_000587	ENSGALT00000021261	1	+	61736608	61736718	61735836	61735959	61738753	61738857	12243	33	1	37	0	169	73	1	1	0.934	1	-0.066
XLOC_000588	ENSGALT00000037496	1	+	61764388	61764406	61763624	61763782	61765043	61765121	9916	0	10	1	9	20	71	0.529006	1	0	0.283	-0.283
XLOC_000589	ENSGALT00000021278	1	+	61898759	61898837	61897866	61898036	61903629	61903786	1327	5	10	11	7	142	73	0.227386	1	0.204	0.447	-0.243
XLOC_000589	ENSGALT00000021278	1	+	61908895	61909150	61908483	61908610	61909987	61910421	1329	4	7	4	12	314	73	1	1	0.117	0.072	0.045
XLOC_002329		1	-	62022896	62022947	62011821	62011921	62027191	62027285	10193	1	41	0	27	88	73	1	1	0.02	0	0.02
XLOC_002329		1	-	62029914	62029965	62028001	62028109	62033486	62033581	10191	7	21	9	28	88	73	1	1	0.217	0.211	0.006
XLOC_002329		1	-	62087592	62087688	62085421	62085478	62092814	62092907	10192	0	1	1	0	132	50	0.395337	1	0	1	-1
XLOC_002329		1	-	62092814	62092907	62077620	62077807	62094016	62094190	10196	28	0	22	2	152	73	0.350059	1	1	0.841	0.159
XLOC_002332	ENSGALT00000045483	1	-	62266628	62266745	62265370	62265448	62267898	62268066	1799	67	0	190	1	174	71	1	1	1	0.987	0.013
XLOC_000601		1	+	62469961	62470055	62400592	62400875	62492321	62492433	9306	2239	14	2034	26	153	73	1	1	0.987	0.974	0.013
XLOC_002335	ENSGALT00000044139	1	-	62786322	62786396	62779915	62784707	62802076	62802133	1756	476	5	397	0	111	50	1	1	0.977	1	-0.023
XLOC_002335	ENSGALT00000044139	1	-	62802076	62802133	62786322	62786396	62885826	62886000	1757	364	5	261	5	94	67	1	1	0.981	0.974	0.007
XLOC_002337		1	-	63196362	63196416	63140689	63140780	63216569	63216609	4252	0	3	2	2	54	33	0.280592	1	0	0.379	-0.379
XLOC_000606		1	+	64128943	64129011	64127580	64127782	64133484	64134264	10617	0	1	1	1	122	73	0.630486	1	0	0.374	-0.374
XLOC_000609	ENSGALT00000021439	1	+	64634889	64635009	64632166	64632250	64647961	64648024	4880	6	4	9	11	162	56	0.686075	1	0.341	0.22	0.121
XLOC_000609	ENSGALT00000021439	1	+	64654341	64654530	64653384	64653431	64655056	64655174	4881	7	4	8	11	215	40	0.542933	1	0.246	0.119	0.127
XLOC_000609	ENSGALT00000021439	1	+	64662633	64662792	64660381	64660591	64664111	64664239	4876	135	0	100	2	218	73	1	1	1	0.944	0.056
XLOC_000609	ENSGALT00000021439	1	+	64666263	64666368	64664987	64665133	64669202	64672896	4877	37	0	51	1	164	73	1	1	1	0.958	0.042
XLOC_000610	ENSGALT00000021444	1	+	64734211	64734278	64733836	64733950	64735525	64736338	2458	3	22	17	19	120	73	0.0155488	0.425126	0.077	0.352	-0.275
XLOC_000616	ENSGALT00000037438	1	+	65241294	65241306	65238747	65238902	65241535	65241651	879	2	52	1	49	10	73	0.869961	1	0.219	0.13	0.089
XLOC_000620		1	+	65462397	65462527	65460833	65461022	65463152	65463265	6020	16	0	70	3	189	73	0.754102	1	1	0.9	0.1
XLOC_000620		1	+	65462478	65462527	65460918	65461022	65463152	65463265	6021	12	0	46	3	84	73	0.93399	1	1	0.93	0.07
XLOC_000623	ENSGALT00000037412	1	+	65755809	65756026	65691666	65692188	65829850	65829937	9804	142	2	47	0	276	73	1	1	0.949	1	-0.051
XLOC_000623	ENSGALT00000037412	1	+	65755809	65756026	65680013	65680043	65829850	65829937	9805	139	4	61	5	226	23	0.261079	1	0.78	0.554	0.226
XLOC_000623	ENSGALT00000037412	1	+	65757525	65757610	65755791	65756026	65829850	65829937	9803	7	46	2	10	146	73	1	1	0.071	0.091	-0.02
XLOC_000623	ENSGALT00000037412	1	+	66293960	66294123	66293658	66293831	66309062	66309171	9807	0	42	3	34	222	73	1	1	0	0.028	-0.028
XLOC_000632	ENSGALT00000021580	1	+	66667011	66667206	66664082	66664234	66669683	66669769	1957	7	6	4	9	254	73	0.487	1	0.251	0.113	0.138
XLOC_000632	ENSGALT00000021580	1	+	66675391	66675500	66669683	66669769	66689812	66689927	1958	13	0	39	1	168	73	1	1	1	0.944	0.056
XLOC_000633	ENSGALT00000021583	1	+	66797418	66797528	66764236	66764381	66802964	66803057	1268	130	5	29	0	169	73	0.704884	1	0.918	1	-0.082
XLOC_000636		1	+	67021006	67021046	67019347	67019643	67025060	67025130	4919	16	0	37	5	56	63	0.391066	1	1	0.893	0.107
XLOC_000636		1	+	67025060	67025130	67021006	67021046	67026662	67026828	4921	21	4	16	1	86	33	0.497157	1	0.668	0.86	-0.192
XLOC_000636		1	+	67025060	67025130	67019445	67019643	67026662	67026828	4922	19	6	14	8	126	73	0.571479	1	0.647	0.503	0.144
XLOC_000636		1	+	67059517	67059556	67054074	67054180	67061218	67061320	4918	114	18	76	10	64	73	1	1	0.878	0.897	-0.019
XLOC_000636		1	+	67085611	67085742	67084478	67084599	67086841	67086920	4920	335	0	217	1	189	72	1	1	1	0.988	0.012
XLOC_000636		1	+	67091917	67092097	67091074	67091137	67093229	67093364	4923	6	70	0	50	222	56	1	1	0.021	0	0.021
XLOC_000637	ENSGALT00000044443	1	+	67104137	67104235	67103478	67103927	67107566	67111591	9683	2	12	4	17	157	73	1	1	0.072	0.099	-0.027
XLOC_000640	ENSGALT00000022697	1	+	67295426	67295488	67293144	67293307	67296330	67296396	3971	0	17	14	7	96	59	3.41591e-05	0.00540079	0	0.551	-0.551
XLOC_002390		1	-	67343727	67343851	67336213	67338507	67349557	67349717	3298	1	4	0	14	183	73	0.84559	1	0.091	0	0.091
XLOC_000642		1	+	67714878	67715768	67705583	67705779	67718922	67719067	1504	1200	1	904	0	949	73	1	1	0.989	1	-0.011
XLOC_002394		1	-	68007668	68007713	67995717	67995872	68024166	68024262	8193	0	11	5	5	76	73	0.0167248	0.44012	0	0.49	-0.49
XLOC_000646	ENSGALT00000022805	1	+	68136887	68137024	68134345	68134443	68138231	68138349	9972	27	0	125	2	196	73	1	1	1	0.959	0.041
XLOC_000650	ENSGALT00000022837	1	+	68395638	68395844	68393388	68393550	68406852	68406939	3506	223	0	368	1	265	73	1	1	1	0.99	0.01
XLOC_000650	ENSGALT00000022837	1	+	68412699	68412792	68408699	68408831	68415061	68415176	3509	329	35	396	25	152	73	0.664142	1	0.819	0.884	-0.065
XLOC_000650	ENSGALT00000022837	1	+	68413311	68413404	68412699	68412792	68415061	68415176	3507	1	213	1	245	152	73	1	1	0.002	0.002	0
XLOC_000650	ENSGALT00000022837	1	+	68416616	68416649	68415061	68415176	68417994	68418056	3508	16	79	43	107	34	55	0.159968	1	0.247	0.394	-0.147
XLOC_000650	ENSGALT00000022837	1	+	68427787	68427820	68426149	68426321	68430024	68430166	3505	53	22	16	29	52	73	0.00158405	0.100513	0.772	0.436	0.336
XLOC_002406	ENSGALT00000022879	1	-	68536964	68537024	68535228	68535275	68537412	68537494	3566	29	2	83	3	73	40	1	1	0.888	0.938	-0.05
XLOC_002407		1	-	68564133	68564247	68563023	68563220	68564847	68564972	6541	80	0	82	4	173	73	0.334626	1	1	0.896	0.104
XLOC_002407		1	-	68564133	68564250	68563023	68563220	68564847	68564972	6542	102	0	125	4	176	73	0.948263	1	1	0.928	0.072
XLOC_002407		1	-	68570866	68571102	68570077	68570233	68571880	68572037	6540	501	0	562	1	295	73	1	1	1	0.993	0.007
XLOC_000654		1	+	68679369	68679585	68676929	68677324	68679687	68679826	8399	2	32	2	40	275	73	1	1	0.016	0.013	0.003
XLOC_002411		1	-	68798371	68798461	68782427	68782544	68801348	68801465	542	0	2	15	1	149	73	0.0253388	0.555402	0	0.88	-0.88
XLOC_000656	ENSGALT00000022942	1	+	69002482	69002708	68988450	68988948	69020939	69021055	10895	104	5	106	0	285	73	0.102587	1	0.842	1	-0.158
XLOC_000656	ENSGALT00000022942	1	+	69002486	69002708	68988766	68988948	69020939	69021055	10892	52	5	66	0	281	73	0.0380742	0.68655	0.73	1	-0.27
XLOC_000656	ENSGALT00000022942	1	+	69020939	69021055	69002482	69002708	69025193	69025307	10894	54	1	65	0	175	73	1	1	0.957	1	-0.043
XLOC_000656	ENSGALT00000022942	1	+	69025193	69025307	69002482	69002708	69029438	69033807	10893	22	0	34	2	173	73	0.564396	1	1	0.878	0.122
XLOC_002413	ENSGALT00000022945	1	-	69171564	69171659	69169360	69169499	69174922	69175049	3093	21	2	26	0	154	73	0.341904	1	0.833	1	-0.167
XLOC_000657	ENSGALT00000022959	1	+	69220514	69220640	69219606	69219749	69223461	69223925	9640	1	0	0	1	185	73	0.395268	1	1	0	1
XLOC_000659	ENSGALT00000022970	1	+	69338875	69338931	69337515	69337631	69339748	69339840	12123	2	1	8	0	98	73	0.30783	1	0.598	1	-0.402
XLOC_000661	ENSGALT00000022983	1	+	70055148	70055222	70045781	70045892	70066318	70066396	9569	33	1	69	0	132	71	1	1	0.947	1	-0.053
XLOC_000690	ENSGALT00000023014	1	+	70645868	70646004	70637398	70637498	70652167	70652339	12689	612	0	642	1	195	73	1	1	1	0.996	0.004
XLOC_000693		1	+	71265851	71265944	71253064	71253211	71293012	71293178	533	12	3	21	0	152	73	0.0865684	1	0.658	1	-0.342
XLOC_000693		1	+	71314175	71314267	71293012	71293178	71328426	71328559	532	51	8	64	8	151	73	1	1	0.755	0.795	-0.04
XLOC_002425		1	-	71458490	71458602	71450883	71452480	71460805	71461107	7441	11	0	38	1	171	73	1	1	1	0.942	0.058
XLOC_000696	ENSGALT00000015796	1	+	71484221	71484393	71482380	71482462	71485964	71486138	10270	32	1	46	0	231	73	0.804794	1	0.91	1	-0.09
XLOC_000696	ENSGALT00000015796	1	+	71514089	71514167	71480381	71480497	71514923	71515005	10269	34	0	111	1	142	73	1	1	1	0.983	0.017
XLOC_002427	ENSGALT00000022552	1	-	71550968	71551099	71548808	71548960	71555423	71555502	2783	92	0	260	6	189	72	1	1	1	0.943	0.057
XLOC_000706	ENSGALT00000037288	1	+	72275151	72275269	72273761	72274765	72276226	72277195	1269	56	3	137	1	177	73	0.468075	1	0.885	0.983	-0.098
XLOC_000706	ENSGALT00000037288	1	+	72275151	72275282	72274656	72274765	72276226	72277068	1271	105	3	212	1	190	73	0.932402	1	0.931	0.988	-0.057
XLOC_000709	ENSGALT00000027951	1	+	72503885	72503997	72499749	72500680	72507852	72508046	6366	0	7	2	12	171	73	0.957442	1	0	0.066	-0.066
XLOC_000710		1	+	73136718	73136890	73128346	73128414	73143225	73143355	13346	114	0	134	1	219	61	1	1	1	0.974	0.026
XLOC_000710		1	+	73145706	73145834	73142970	73143355	73147904	73149853	13347	77	0	77	1	187	73	1	1	1	0.968	0.032
XLOC_002437		1	-	73275642	73275720	73273391	73273502	73280629	73280751	8865	7	0	27	1	142	73	1	1	1	0.933	0.067
XLOC_002438		1	-	73322092	73322185	73301892	73304017	73323566	73323715	10181	10	46	30	113	152	73	1	1	0.095	0.113	-0.018
XLOC_002438		1	-	73323566	73323715	73301892	73304017	73337892	73338052	10183	157	1	342	0	208	73	1	1	0.982	1	-0.018
XLOC_002438		1	-	73337892	73338052	73323566	73323715	73343555	73343731	10182	89	0	208	1	219	73	1	1	1	0.986	0.014
XLOC_002438		1	-	73340693	73340909	73337892	73338052	73342328	73342549	10184	204	3	334	0	275	73	1	1	0.948	1	-0.052
XLOC_002438		1	-	73342328	73342549	73337892	73338052	73343555	73343761	10185	53	3	173	3	280	73	0.49333	1	0.822	0.938	-0.116
XLOC_000714	ENSGALT00000027937	1	+	73526819	73526961	73523207	73523299	73528597	73528700	6126	175	0	427	1	201	73	1	1	1	0.994	0.006
XLOC_000714	ENSGALT00000027937	1	+	73526819	73526961	73518013	73518079	73528597	73528700	6127	114	0	275	2	187	59	1	1	1	0.977	0.023
XLOC_000714	ENSGALT00000027937	1	+	73533457	73533601	73533114	73533210	73534335	73534402	6129	10	46	20	118	190	60	1	1	0.064	0.051	0.013
XLOC_002440	ENSGALT00000037265	1	-	74179381	74179583	74174573	74174685	74185386	74185467	12576	3	0	14	7	261	73	0.328114	1	1	0.359	0.641
XLOC_002441	ENSGALT00000037259	1	-	74405624	74405760	74401771	74403099	74407565	74407724	436	127	0	137	1	195	73	1	1	1	0.981	0.019
XLOC_002441	ENSGALT00000037259	1	-	74435581	74435676	74433885	74434046	74436824	74437105	435	162	1	131	0	154	73	1	1	0.987	1	-0.013
XLOC_002445	ENSGALT00000023174	1	-	74814181	74814302	74813797	74813873	74814397	74814539	8825	23	4	22	4	176	69	1	1	0.693	0.683	0.01
XLOC_002445	ENSGALT00000023174	1	-	74838976	74839078	74837094	74837226	74901415	74901495	8820	70	0	103	2	161	73	1	1	1	0.959	0.041
XLOC_002445	ENSGALT00000023174	1	-	74840631	74840706	74838976	74839078	74901415	74901495	8826	34	0	43	1	136	73	1	1	1	0.958	0.042
XLOC_002445	ENSGALT00000023174	1	-	74841747	74841971	74840631	74840706	74842359	74842551	8823	10	8	7	18	278	68	0.266469	1	0.234	0.087	0.147
XLOC_002445	ENSGALT00000023174	1	-	74842817	74842832	74842359	74842551	74901415	74902323	8822	1	8	6	33	16	73	0.92039	1	0.363	0.453	-0.09
XLOC_002445	ENSGALT00000023174	1	-	74968312	74968388	74901415	74901495	74976300	74976411	8819	34	0	222	26	138	73	0.0595848	0.854515	1	0.819	0.181
XLOC_002447	ENSGALT00000030504	1	-	75018175	75018214	75016681	75016816	75020456	75020519	6370	3	38	0	26	47	56	0.610869	1	0.086	0	0.086
XLOC_002447	ENSGALT00000030504	1	-	75063251	75063330	75043093	75043345	75063662	75064975	6369	8	52	4	25	144	73	1	1	0.072	0.075	-0.003
XLOC_000725		1	+	75125420	75125499	75124208	75125088	75140337	75141658	8030	3	23	0	13	144	73	1	1	0.062	0	0.062
XLOC_002449		1	-	75167024	75167173	75165810	75165905	75167548	75167688	364	52	0	104	1	208	73	1	1	1	0.973	0.027
XLOC_002449		1	-	75167024	75167178	75165810	75165905	75167548	75167688	365	37	0	77	1	213	73	1	1	1	0.963	0.037
XLOC_002449		1	-	75172077	75172173	75171577	75171619	75173192	75173288	367	7	0	40	2	117	35	0.82932	1	1	0.857	0.143
XLOC_002453	ENSGALT00000023154	1	-	75262693	75262784	75261232	75261585	75279813	75281111	12853	0	22	2	20	150	73	1	1	0	0.046	-0.046
XLOC_002453	ENSGALT00000023154	1	-	75279813	75279951	75261232	75261585	75287484	75287781	12850	65	0	69	1	197	73	1	1	1	0.962	0.038
XLOC_002453	ENSGALT00000023154	1	-	75279813	75279987	75261232	75261585	75287484	75287798	12851	72	0	90	1	233	73	1	1	1	0.966	0.034
XLOC_000730	ENSGALT00000037222	1	+	75548253	75548371	75547605	75547804	75550868	75551094	1915	2	0	32	2	177	73	1	1	1	0.868	0.132
XLOC_000730	ENSGALT00000037222	1	+	75560660	75560823	75557812	75557887	75561416	75561631	1918	2	2	15	1	217	68	0.117012	1	0.239	0.825	-0.586
XLOC_000732	ENSGALT00000023070	1	+	75650165	75650321	75649063	75649213	75651418	75651917	12833	18	1	49	3	215	73	1	1	0.859	0.847	0.012
XLOC_002462		1	-	75970525	75970698	75963265	75963381	75977985	75978205	13063	112	0	190	2	232	73	1	1	1	0.968	0.032
XLOC_002462		1	-	75984511	75984627	75977985	75978205	76021373	76021454	13065	147	0	109	2	175	73	1	1	1	0.958	0.042
XLOC_002465	ENSGALT00000023287	1	-	76271558	76271618	76267858	76268160	76275502	76275649	6743	35	0	79	4	106	73	0.83813	1	1	0.932	0.068
XLOC_002465	ENSGALT00000023287	1	-	76271558	76271618	76267858	76268160	76276183	76276309	6744	11	0	21	2	106	73	0.618945	1	1	0.879	0.121
XLOC_002465	ENSGALT00000023287	1	-	76275502	76275649	76271558	76271618	76276183	76276309	6741	62	0	266	2	186	53	1	1	1	0.974	0.026
XLOC_002465	ENSGALT00000023287	1	-	76275502	76275649	76267625	76268160	76276183	76276309	6742	38	0	210	2	206	73	1	1	1	0.974	0.026
XLOC_002466		1	-	76298529	76298742	76293982	76294110	76303672	76303798	8012	4	17	2	18	272	73	1	1	0.059	0.029	0.03
XLOC_000742	ENSGALT00000044064	1	+	76403800	76403928	76403326	76403466	76404011	76404135	9841	29	0	101	1	187	73	1	1	1	0.975	0.025
XLOC_002471	ENSGALT00000023324	1	-	76451500	76451509	76449926	76451039	76451955	76452096	8233	1	7	0	2	4	73	0.785373	1	0.723	0	0.723
XLOC_002472	ENSGALT00000023339	1	-	76481350	76481542	76481051	76481252	76481911	76482008	6951	372	1	631	0	251	73	1	1	0.991	1	-0.009
XLOC_002477		1	-	76575241	76575424	76574352	76574431	76576077	76576302	777	12	5	13	14	241	72	0.298115	1	0.418	0.217	0.201
XLOC_002477		1	-	76593075	76593235	76590267	76590338	76594124	76594351	773	9	6	34	6	210	64	0.119003	1	0.314	0.633	-0.319
XLOC_002477		1	-	76593075	76593235	76590267	76590334	76594124	76594351	774	8	3	38	4	206	60	0.267769	1	0.437	0.735	-0.298
XLOC_002477		1	-	76593075	76593265	76590267	76590338	76594124	76594173	775	13	6	24	6	209	33	0.596285	1	0.255	0.387	-0.132
XLOC_002477		1	-	76593075	76593265	76590267	76590334	76594124	76594173	776	12	3	28	4	205	29	0.708326	1	0.361	0.498	-0.137
XLOC_002479	ENSGALT00000023361	1	-	76646308	76646468	76645984	76646223	76646814	76646940	11734	310	1	582	0	219	73	1	1	0.99	1	-0.01
XLOC_000750		1	+	76722649	76722725	76719754	76719872	76722988	76723129	9602	41	0	78	1	138	73	1	1	1	0.976	0.024
XLOC_000750		1	+	76722649	76722681	76719754	76719872	76722988	76723148	9604	21	0	41	1	50	73	1	1	1	0.984	0.016
XLOC_000751	ENSGALT00000023441	1	+	76751747	76751891	76751047	76751170	76752015	76752161	11561	69	0	160	1	203	73	1	1	1	0.983	0.017
XLOC_000757		1	+	76824121	76824218	76823621	76823735	76824633	76824713	8348	50	0	32	2	156	73	0.438993	1	1	0.882	0.118
XLOC_000761		1	+	76918468	76918585	76918036	76918127	76918979	76919072	9331	29	1	65	9	176	73	0.307704	1	0.923	0.75	0.173
XLOC_000761		1	+	76918468	76918585	76918036	76918127	76919252	76919372	9332	19	2	46	2	176	73	0.709773	1	0.798	0.905	-0.107
XLOC_000761		1	+	76918468	76919072	76918036	76918127	76919252	76919372	9333	48	2	99	2	663	73	0.728271	1	0.725	0.845	-0.12
XLOC_000761		1	+	76918979	76919072	76918036	76918127	76919252	76919372	9330	13	2	43	2	152	73	0.518347	1	0.757	0.912	-0.155
XLOC_000761		1	+	76922631	76922797	76922274	76922490	76922981	76923139	9328	5	0	22	1	225	73	0.956377	1	1	0.877	0.123
XLOC_002486	ENSGALT00000023672	1	-	77018752	77018845	77017968	77018466	77019974	77020150	13147	8	26	0	9	152	73	0.23982	1	0.129	0	0.129
XLOC_000766		1	+	77225845	77225992	77224169	77224304	77227215	77227496	12550	2	3	0	3	206	73	0.422466	1	0.191	0	0.191
XLOC_000766		1	+	77227215	77227319	77224169	77224304	77229397	77229511	12552	3	1	5	0	163	73	0.440524	1	0.573	1	-0.427
XLOC_000766		1	+	77227215	77227319	77225845	77225992	77229397	77229511	12553	0	1	2	0	163	73	0.268825	1	0	1	-1
XLOC_002491	ENSGALT00000043687	1	-	77244367	77244403	77242778	77242895	77245424	77245525	8314	24	0	107	5	58	73	1	1	1	0.964	0.036
XLOC_000774	ENSGALT00000029277	1	+	77864090	77864339	77862344	77862555	77864583	77864765	10661	27	0	39	2	308	73	0.446927	1	1	0.822	0.178
XLOC_000774	ENSGALT00000029277	1	+	77864094	77864339	77862405	77862555	77864583	77864765	10660	20	0	31	2	304	73	0.437685	1	1	0.788	0.212
XLOC_002501	ENSGALT00000043829	1	-	77919679	77919732	77919248	77919506	77919826	77919939	6135	0	2	1	1	92	73	0.466335	1	0	0.442	-0.442
XLOC_002503	ENSGALT00000030483	1	-	77959771	77959936	77954028	77956363	77964004	77964226	8835	1478	2	602	0	224	73	1	1	0.996	1	-0.004
XLOC_002504	ENSGALT00000023816	1	-	77978630	77978926	77978054	77978270	77980345	77980497	12331	1	0	7	1	355	73	0.911653	1	1	0.59	0.41
XLOC_002504	ENSGALT00000023816	1	-	77978630	77978914	77978054	77978270	77980345	77980497	12332	2	0	7	1	343	73	0.803517	1	1	0.598	0.402
XLOC_000778		1	+	78371152	78371302	78351176	78351229	78387281	78387404	1228	21	0	22	2	182	46	0.318072	1	1	0.735	0.265
XLOC_000778		1	+	78387281	78387404	78371029	78371302	78388948	78389253	1229	8	3	14	0	182	73	0.0816472	0.985977	0.517	1	-0.483
XLOC_000780		1	+	78569204	78569355	78567472	78567550	78570233	78570310	3055	71	0	152	1	205	68	1	1	1	0.981	0.019
XLOC_002508		1	-	78627769	78627878	78626849	78626972	78629028	78629300	3937	102	1	168	1	168	73	1	1	0.978	0.986	-0.008
XLOC_002510	ENSGALT00000023929	1	-	78819279	78819344	78818860	78819023	78819798	78819958	10622	2	1	9	0	116	73	0.282238	1	0.557	1	-0.443
XLOC_002511	ENSGALT00000024101	1	-	78973229	78973301	78966591	78966657	78974964	78975116	4651	2	0	4	7	116	59	0.196391	1	1	0.225	0.775
XLOC_002511	ENSGALT00000024101	1	-	79018951	79019086	79005871	79005935	79041046	79041147	4650	10	0	41	1	178	57	1	1	1	0.929	0.071
XLOC_002519	ENSGALT00000024199	1	-	79759533	79759605	79757155	79757636	79761663	79761804	10685	2	0	1	1	130	73	0.45562	1	1	0.36	0.64
XLOC_000802	ENSGALT00000024296	1	+	80005347	80005384	80004540	80004629	80006655	80006804	11761	5	0	15	1	60	73	1	1	1	0.948	0.052
XLOC_000803	ENSGALT00000024311	1	+	80047785	80047932	80036285	80036312	80048952	80049419	13030	0	3	1	0	153	20	0.356988	1	0	1	-1
XLOC_000814	ENSGALT00000036945	1	+	82447059	82447526	82445459	82445715	82448031	82448126	3306	40	1	31	0	526	73	0.687269	1	0.847	1	-0.153
XLOC_002539	ENSGALT00000045625	1	-	82581387	82581678	82580605	82580713	82587391	82587567	1312	234	1	329	1	350	73	1	1	0.98	0.986	-0.006
XLOC_002539	ENSGALT00000045625	1	-	82581387	82581681	82580605	82580713	82587391	82587839	1313	255	1	356	1	353	73	1	1	0.981	0.987	-0.006
XLOC_000825	ENSGALT00000024538	1	+	82994466	82994501	82993904	82993986	82995214	82995367	7561	18	1	79	0	56	73	1	1	0.959	1	-0.041
XLOC_000825	ENSGALT00000024538	1	+	83014721	83014973	83013913	83014005	83015121	83015244	7559	9	21	0	41	311	73	0.61087	1	0.091	0	0.091
XLOC_002553	ENSGALT00000024599	1	-	83526875	83526953	83524620	83524800	83527046	83527114	8013	19	0	34	1	130	61	1	1	1	0.941	0.059
XLOC_002556	ENSGALT00000024592	1	-	83573217	83573364	83572612	83572723	83573442	83573845	1836	23	0	134	1	206	73	1	1	1	0.979	0.021
XLOC_000832		1	+	83628119	83628233	83614366	83615476	83632808	83632908	2415	1	23	1	26	173	73	1	1	0.018	0.016	0.002
XLOC_000832		1	+	83633730	83633799	83632808	83632908	83635182	83635260	2418	16	15	80	18	122	71	0.00727897	0.27351	0.383	0.721	-0.338
XLOC_000832		1	+	83649503	83649679	83647265	83647925	83650779	83650917	2416	143	0	121	1	235	73	1	1	1	0.974	0.026
XLOC_000832		1	+	83649503	83649690	83647829	83647925	83650779	83650917	2417	277	0	276	1	246	73	1	1	1	0.988	0.012
XLOC_000832		1	+	83654410	83654563	83650779	83650917	83656234	83657207	2414	173	0	298	1	212	73	1	1	1	0.99	0.01
XLOC_002558	ENSGALT00000024611	1	-	83692389	83692502	83666665	83666981	83732372	83732503	7762	843	27	442	28	172	73	0.712299	1	0.93	0.87	0.06
XLOC_002558	ENSGALT00000024611	1	-	83745107	83745202	83732372	83732503	83748425	83748616	7763	0	759	10	367	154	73	1	1	0	0.013	-0.013
XLOC_002560	ENSGALT00000024644	1	-	84005196	84005299	84003756	84003817	84006054	84006114	5279	24	0	45	1	123	34	1	1	1	0.926	0.074
XLOC_000834	ENSGALT00000024650	1	+	84245513	84245558	84244136	84244279	84248368	84248457	7633	25	8	25	4	76	73	0.602741	1	0.75	0.857	-0.107
XLOC_000834	ENSGALT00000024650	1	+	84245513	84245558	84244136	84244279	84248365	84248457	7634	20	1	27	0	76	73	1	1	0.951	1	-0.049
XLOC_002562	ENSGALT00000024704	1	-	84439828	84439894	84438517	84438598	84441100	84441175	7793	0	1	2	0	113	68	0.269858	1	0	1	-1
XLOC_002566	ENSGALT00000036905	1	-	84687490	84687688	84683609	84683710	84697804	84697899	12782	11	7	13	8	257	73	1	1	0.309	0.316	-0.007
XLOC_002566	ENSGALT00000036905	1	-	84699854	84699962	84697804	84697899	84702423	84702470	12784	10	0	17	3	134	40	0.285771	1	1	0.628	0.372
XLOC_000844		1	+	84775198	84775341	84773696	84773747	84777172	84777226	3046	3	0	5	6	147	18	0.186594	1	1	0.093	0.907
XLOC_000844		1	+	84775198	84775341	84773802	84774046	84777172	84777226	3047	3	0	6	1	176	47	0.694828	1	1	0.616	0.384
XLOC_000844		1	+	84778606	84778676	84777605	84777818	84782651	84783412	3044	0	10	2	8	126	73	0.457843	1	0	0.127	-0.127
XLOC_000844		1	+	84783777	84783872	84782651	84783412	84784289	84784363	3045	0	7	2	5	148	67	0.386375	1	0	0.153	-0.153
XLOC_002571		1	-	86046642	86046774	86045309	86045450	86046873	86047330	7587	19	1	2	0	191	73	1	1	0.879	1	-0.121
XLOC_000855	ENSGALT00000024777	1	+	86674822	86674993	86605188	86605261	86676547	86676790	2686	9	0	20	8	223	66	0.0863319	1	1	0.425	0.575
XLOC_000855	ENSGALT00000024777	1	+	86674822	86674993	86634185	86634328	86676547	86676790	2687	11	1	13	0	230	73	0.543218	1	0.777	1	-0.223
XLOC_000855	ENSGALT00000024777	1	+	86694584	86694682	86692277	86692358	86699718	86699799	2685	10	3	44	9	157	73	0.856543	1	0.608	0.694	-0.086
XLOC_000855	ENSGALT00000024777	1	+	86694601	86694682	86692277	86692358	86699718	86699799	2681	18	3	86	9	146	73	0.851732	1	0.75	0.827	-0.077
XLOC_000855	ENSGALT00000024777	1	+	86694601	86694682	86692277	86692358	86702648	86702726	2682	15	0	52	2	144	71	0.9757	1	1	0.928	0.072
XLOC_000855	ENSGALT00000024777	1	+	86699718	86699799	86694601	86694682	86702648	86702726	2689	46	7	112	10	144	71	0.716534	1	0.764	0.847	-0.083
XLOC_000855	ENSGALT00000024777	1	+	86699718	86699799	86692277	86692358	86702648	86702726	2690	39	0	77	2	144	71	1	1	1	0.95	0.05
XLOC_000855	ENSGALT00000024777	1	+	86702647	86702726	86699718	86699799	86704903	86705816	2688	147	4	141	9	144	73	0.828315	1	0.949	0.888	0.061
XLOC_000855	ENSGALT00000024777	1	+	86702648	86702726	86699718	86699799	86704903	86705816	2683	183	4	209	9	142	73	1	1	0.959	0.923	0.036
XLOC_002572	ENSGALT00000030435	1	-	86830028	86830076	86826846	86826936	86831331	86831682	3909	44	38	113	46	82	73	0.0579337	0.842085	0.508	0.686	-0.178
XLOC_000857		1	+	86869877	86870608	86868339	86868377	86871592	86871913	185	567	0	277	1	748	31	0.915535	1	1	0.92	0.08
XLOC_000857		1	+	86869877	86869947	86868339	86868377	86870514	86870608	188	26	2	68	4	84	31	1	1	0.828	0.863	-0.035
XLOC_000857		1	+	86870514	86870608	86868339	86868377	86871592	86871913	184	344	0	203	1	111	31	1	1	1	0.983	0.017
XLOC_000857		1	+	86872345	86872606	86871592	86871913	86874416	86874707	186	513	2	554	3	320	73	1	1	0.983	0.977	0.006
XLOC_000857		1	+	86879264	86879468	86877653	86877745	86894310	86896511	187	100	56	113	33	263	73	0.0877088	1	0.331	0.487	-0.156
XLOC_002575	ENSGALT00000024790	1	-	86966151	86966246	86965473	86965570	86967730	86967843	2668	13	0	91	2	154	73	1	1	1	0.956	0.044
XLOC_002578		1	-	87056670	87056734	87055366	87055454	87057218	87058810	2916	5	1	19	1	114	73	0.649529	1	0.762	0.924	-0.162
XLOC_000862		1	+	87646237	87646389	87643100	87643218	87654806	87658410	12457	72	0	159	1	211	73	1	1	1	0.982	0.018
XLOC_000865		1	+	87874839	87874930	87850318	87850702	87878150	87879496	12277	57	0	61	4	150	73	0.261989	1	1	0.881	0.119
XLOC_000865		1	+	87874839	87874930	87866625	87866651	87878150	87879496	12279	60	0	63	3	96	19	0.216913	1	1	0.806	0.194
XLOC_000865		1	+	87901737	87901866	87891678	87891816	87906188	87906344	12284	370	177	266	56	188	73	0.000239286	0.0247606	0.448	0.648	-0.2
XLOC_000865		1	+	87911431	87911575	87907963	87908053	87913207	87913348	12280	212	106	220	37	203	73	1.72329e-05	0.00315348	0.418	0.681	-0.263
XLOC_000865		1	+	87912366	87912540	87911431	87911575	87913207	87913348	12282	45	96	27	81	233	73	1	1	0.128	0.095	0.033
XLOC_000865		1	+	87919203	87919239	87913916	87914016	87920951	87921159	12283	12	194	6	160	58	73	1	1	0.072	0.045	0.027
XLOC_000865		1	+	87920951	87921159	87913916	87914016	87923857	87923948	12276	786	0	552	3	267	73	1	1	1	0.981	0.019
XLOC_000866	ENSGALT00000024813	1	+	87941115	87941235	87940315	87940427	87941356	87941494	4060	2	18	3	13	179	73	1	1	0.043	0.086	-0.043
XLOC_002584		1	-	88159162	88159684	88153348	88157694	88159944	88159954	6231	45	0	54	2	511	3	0.323159	1	1	0.137	0.863
XLOC_000876	ENSGALT00000024843	1	+	88203018	88203045	88200482	88200703	88204493	88205961	1861	2	13	0	46	40	73	0.159564	1	0.219	0	0.219
XLOC_002585	ENSGALT00000024855	1	-	89070881	89070947	89067840	89067963	89071648	89071735	4978	2	116	0	101	118	73	1	1	0.011	0	0.011
XLOC_000880		1	+	89078925	89079071	89078532	89078558	89082909	89083074	8489	0	9	2	11	151	19	1	1	0	0.022	-0.022
XLOC_000880		1	+	89078925	89079028	89078532	89078558	89082909	89083074	8492	0	9	1	11	108	19	1	1	0	0.016	-0.016
XLOC_000880		1	+	89121024	89121068	89120067	89120136	89125598	89127999	8490	4	14	11	36	63	62	1	1	0.219	0.231	-0.012
XLOC_000881	ENSGALT00000024864	1	+	89132015	89132161	89130945	89131055	89132552	89132896	2612	2	8	0	18	205	73	0.728104	1	0.082	0	0.082
XLOC_000881	ENSGALT00000024864	1	+	89133655	89133758	89132552	89132896	89134425	89134580	2611	3	4	3	10	162	73	0.627819	1	0.253	0.119	0.134
XLOC_000883	ENSGALT00000036866	1	+	90628153	90628232	90613562	90613766	90639883	90640320	7314	25	0	33	1	144	73	1	1	1	0.944	0.056
XLOC_002593	ENSGALT00000024895	1	-	90811834	90811894	90807267	90807373	90817531	90817696	6044	5	3	28	5	106	73	0.321582	1	0.534	0.794	-0.26
XLOC_002593	ENSGALT00000024895	1	-	90811834	90811894	90807267	90807373	90822087	90822333	6046	11	46	43	77	106	73	0.145393	1	0.141	0.278	-0.137
XLOC_002593	ENSGALT00000024895	1	-	90815025	90815148	90811834	90811894	90822087	90822333	6041	0	6	2	15	162	53	1	1	0	0.042	-0.042
XLOC_002593	ENSGALT00000024895	1	-	90817531	90817696	90811834	90811894	90822087	90822333	6047	11	6	2	15	204	53	0.0103951	0.327433	0.323	0.033	0.29
XLOC_002593	ENSGALT00000024895	1	-	90817531	90817696	90807267	90807373	90822087	90822333	6048	14	46	7	77	224	73	0.695821	1	0.09	0.029	0.061
XLOC_002594		1	-	90880270	90880376	90874572	90875662	90884251	90884384	7276	36	0	52	2	165	73	0.774712	1	1	0.92	0.08
XLOC_002594		1	-	90882642	90882716	90880270	90880376	90884251	90884384	7273	0	9	7	14	134	73	0.0902769	1	0	0.214	-0.214
XLOC_002594		1	-	90884251	90884384	90874574	90875662	90890927	90891141	7275	30	4	30	0	192	73	0.106169	1	0.74	1	-0.26
XLOC_002596	ENSGALT00000030405	1	-	91038490	91038632	91036211	91036357	91042475	91042649	9826	26	2	80	0	201	73	0.222013	1	0.825	1	-0.175
XLOC_000888		1	+	91224482	91224539	91215107	91215227	91228916	91229063	148	1	0	1	3	100	73	0.371265	1	1	0.196	0.804
XLOC_000893		1	+	91405493	91405628	91401936	91402356	91412450	91412685	12255	1	24	0	50	194	73	1	1	0.015	0	0.015
XLOC_000895		1	+	91575527	91575929	91573452	91573840	91578477	91578882	9822	303	18	187	11	461	73	1	1	0.727	0.729	-0.002
XLOC_002606	ENSGALT00000030399	1	-	91610835	91611182	91603651	91604624	91612448	91612619	5427	143	3	139	42	406	73	6.61969e-08	3.42493e-05	0.896	0.373	0.523
XLOC_002621	ENSGALT00000024972	1	-	91766370	91766450	91765459	91765547	91766995	91767126	11701	14	0	58	1	146	73	1	1	1	0.967	0.033
XLOC_000910	ENSGALT00000024991	1	+	92322427	92322685	92320724	92321225	92326937	92327538	8723	25	199	16	33	317	73	0.405344	1	0.028	0.1	-0.072
XLOC_000921	ENSGALT00000025009	1	+	95915629	95915656	95912122	95912320	95918329	95918372	4408	4	7	3	14	20	36	0.42831	1	0.507	0.278	0.229
XLOC_000921	ENSGALT00000025009	1	+	95918329	95918372	95912122	95912320	95921680	95921835	4411	35	1	51	0	72	73	1	1	0.973	1	-0.027
XLOC_000921	ENSGALT00000025009	1	+	95925671	95926007	95921680	95921835	95928453	95928561	4410	309	6	212	5	395	73	1	1	0.905	0.887	0.018
XLOC_002635	ENSGALT00000036826	1	-	96259580	96259763	96254814	96254985	96268229	96268438	995	0	5	4	0	242	73	0.00949925	0.311629	0	1	-1
XLOC_002635	ENSGALT00000036826	1	-	96271640	96271901	96268229	96268438	96278058	96278215	997	6	0	6	1	320	73	0.533157	1	1	0.578	0.422
XLOC_000926	ENSGALT00000025277	1	+	97388917	97389013	97388750	97388835	97390132	97390259	8105	9	0	8	1	155	73	0.566987	1	1	0.79	0.21
XLOC_000926	ENSGALT00000025277	1	+	97388946	97389013	97388750	97388835	97390132	97390259	8102	11	0	14	1	120	73	0.803721	1	1	0.895	0.105
XLOC_000926	ENSGALT00000025277	1	+	97391908	97392111	97391461	97391629	97392351	97392538	8101	12	36	5	13	262	73	1	1	0.085	0.097	-0.012
XLOC_000926	ENSGALT00000025277	1	+	97402922	97403066	97401903	97402005	97404189	97404348	8104	43	0	41	1	203	73	1	1	1	0.936	0.064
XLOC_002644		1	-	97658158	97658284	97651365	97655207	97670288	97670337	7130	2	5	3	15	154	42	1	1	0.098	0.052	0.046
XLOC_002644		1	-	97670288	97670337	97654741	97655207	97710929	97711805	7129	7	2	26	1	84	73	0.312181	1	0.753	0.958	-0.205
XLOC_002644		1	-	97679592	97679791	97670288	97670337	97710929	97711014	7131	9	2	5	11	227	42	0.0373724	0.68121	0.454	0.078	0.376
XLOC_000941	ENSGALT00000025309	1	+	97965571	97965708	97956739	97956884	97971966	97972129	2839	107	11	105	6	196	73	0.668713	1	0.784	0.867	-0.083
XLOC_000941	ENSGALT00000025309	1	+	97965584	97965708	97956739	97956884	97971966	97972129	2845	218	11	178	6	183	73	1	1	0.888	0.922	-0.034
XLOC_000941	ENSGALT00000025309	1	+	97997081	97997212	97996677	97996805	97997606	97997947	2837	9	84	10	60	190	73	1	1	0.04	0.06	-0.02
XLOC_000941	ENSGALT00000025309	1	+	97997081	97997151	97996677	97996805	97997606	97997702	2840	0	84	3	60	126	73	1	1	0	0.028	-0.028
XLOC_000941	ENSGALT00000025309	1	+	98010470	98010584	98007462	98007602	98015886	98016065	2841	6	51	1	46	173	73	1	1	0.047	0.009	0.038
XLOC_000943		1	+	98255873	98255952	98246648	98246707	98258568	98258640	5262	8	1	30	2	115	44	0.868968	1	0.754	0.852	-0.098
XLOC_000943		1	+	98258568	98258640	98246648	98246707	98286678	98286727	5263	2	1	3	2	78	21	1	1	0.35	0.288	0.062
XLOC_000950	ENSGALT00000025378	1	+	100194896	100195034	100180459	100180605	100201276	100201427	4635	1	1	2	1	197	73	0.878016	1	0.27	0.426	-0.156
XLOC_000955	ENSGALT00000025394	1	+	101872683	101872836	101871362	101871476	101874772	101874978	884	48	0	269	3	212	73	1	1	1	0.969	0.031
XLOC_002668	ENSGALT00000025402	1	-	101883628	101883817	101882974	101883099	101883912	101884143	8940	1269	1	2436	0	248	73	1	1	0.997	1	-0.003
XLOC_002669	ENSGALT00000036803	1	-	102020872	102021040	102006315	102006449	102030922	102031125	10252	402	6	331	1	227	73	1	1	0.956	0.991	-0.035
XLOC_002672		1	-	102428831	102428911	102416057	102416225	102431156	102431289	7398	0	4	2	2	146	73	0.231807	1	0	0.333	-0.333
XLOC_000960		1	+	103318625	103318724	103315889	103315987	103320939	103321118	2046	27	0	112	4	158	73	0.853251	1	1	0.928	0.072
XLOC_000960		1	+	103318625	103318724	103316188	103316229	103320939	103321118	2047	24	0	74	1	119	34	1	1	1	0.955	0.045
XLOC_000960		1	+	103321777	103321881	103320939	103321118	103324224	103324328	2045	15	0	87	2	163	73	1	1	1	0.951	0.049
XLOC_002678	ENSGALT00000025507	1	-	103338909	103339007	103338043	103338265	103339442	103339562	1483	38	75	143	206	157	73	0.936489	1	0.191	0.244	-0.053
XLOC_002683	ENSGALT00000025555	1	-	104012813	104012861	104011594	104011703	104013349	104013450	3969	0	10	1	11	82	73	0.950065	1	0	0.075	-0.075
XLOC_000965	ENSGALT00000025595	1	+	104087546	104087602	104079838	104080131	104094300	104094436	1849	9	1	13	0	98	73	0.648434	1	0.87	1	-0.13
XLOC_002687	ENSGALT00000025637	1	-	104445254	104445287	104441125	104441317	104446765	104446922	8922	1	22	1	6	52	73	0.704166	1	0.06	0.19	-0.13
XLOC_002687	ENSGALT00000025637	1	-	104448217	104449085	104446765	104446931	104450004	104450157	8918	36	13	16	11	927	73	0.68049	1	0.179	0.103	0.076
XLOC_002688	ENSGALT00000025680	1	-	104484617	104484762	104484340	104484462	104486296	104486496	10238	88	2	93	0	204	73	1	1	0.94	1	-0.06
XLOC_000970		1	+	104626898	104627062	104626590	104626720	104627229	104627402	5011	132	0	140	3	223	73	1	1	1	0.939	0.061
XLOC_000971		1	+	104638686	104638759	104637120	104637287	104639097	104639248	4303	0	3	4	6	132	73	0.305836	1	0	0.269	-0.269
XLOC_002690		1	-	104700859	104700919	104700527	104700703	104704185	104704334	12611	0	3	1	0	106	73	0.218401	1	0	1	-1
XLOC_002691		1	-	104766952	104767005	104764066	104764215	104770763	104770910	11379	12	0	67	4	92	73	0.935716	1	1	0.93	0.07
XLOC_002691		1	-	104766956	104767005	104764066	104764215	104770763	104770910	11377	16	0	91	4	84	73	1	1	1	0.952	0.048
XLOC_002691		1	-	104766956	104767006	104764066	104764215	104770763	104770910	11380	4	0	26	4	86	73	0.666726	1	1	0.847	0.153
XLOC_000976		1	+	104804778	104804858	104798087	104798204	104805578	104805746	568	32	229	23	187	146	73	1	1	0.065	0.058	0.007
XLOC_002692	ENSGALT00000025769	1	-	104826435	104826459	104825320	104825419	104829686	104829798	10175	1	23	0	34	34	73	0.83362	1	0.085	0	0.085
XLOC_002692	ENSGALT00000025769	1	-	104829686	104829798	104825320	104825419	104830599	104830737	10176	30	0	48	1	171	73	1	1	1	0.953	0.047
XLOC_000977	ENSGALT00000025788	1	+	104868826	104868886	104842392	104842557	104873235	104873328	1801	21	0	90	1	106	73	1	1	1	0.984	0.016
XLOC_000977	ENSGALT00000025788	1	+	104883483	104883663	104881909	104882070	104884279	104884373	1802	18	43	38	40	239	73	0.209284	1	0.113	0.225	-0.112
XLOC_000977	ENSGALT00000025788	1	+	104937606	104937795	104937096	104937288	104946423	104946545	1800	190	6	196	4	248	73	1	1	0.903	0.935	-0.032
XLOC_000981		1	+	105069064	105069159	105063859	105064005	105075012	105076033	12124	1	53	2	85	154	73	1	1	0.009	0.011	-0.002
XLOC_000989		1	+	105985852	105985972	105985355	105985546	105987122	105988707	2245	0	4	1	9	179	73	1	1	0	0.043	-0.043
XLOC_000990	ENSGALT00000025841	1	+	106019219	106019318	106016590	106016663	106020496	106020711	968	17	3	21	0	151	66	0.139754	1	0.712	1	-0.288
XLOC_000990	ENSGALT00000025841	1	+	106019219	106019352	106016590	106016663	106020496	106020711	969	48	3	58	0	185	66	0.233413	1	0.851	1	-0.149
XLOC_000990	ENSGALT00000025841	1	+	106036522	106036583	106034185	106034349	106037212	106037379	967	4	49	5	19	108	73	0.487408	1	0.052	0.151	-0.099
XLOC_002704	ENSGALT00000030355	1	-	106246151	106246266	106242408	106242622	106249500	106249661	4290	98	0	116	1	174	73	1	1	1	0.98	0.02
XLOC_002704	ENSGALT00000030355	1	-	106343691	106343801	106342760	106343003	106345869	106346819	4288	1	42	1	65	169	73	1	1	0.01	0.007	0.003
XLOC_002704	ENSGALT00000030355	1	-	106345869	106346819	106342820	106343003	106348400	106348563	4289	475	1	665	0	1009	73	1	1	0.972	1	-0.028
XLOC_002705		1	-	106376606	106376679	106375959	106376078	106378133	106378450	8018	15	0	67	1	132	73	1	1	1	0.974	0.026
XLOC_000994	ENSGALT00000025859	1	+	106382900	106383033	106381658	106381704	106383433	106383521	5960	44	0	43	3	158	39	0.187864	1	1	0.78	0.22
XLOC_000994	ENSGALT00000025859	1	+	106418783	106418830	106418098	106418362	106420486	106420543	5959	35	0	51	3	57	50	0.788477	1	1	0.937	0.063
XLOC_002708	ENSGALT00000030350	1	-	106961387	106961468	106959341	106959413	106962456	106962660	8668	31	4	21	2	138	65	1	1	0.785	0.832	-0.047
XLOC_002710	ENSGALT00000025882	1	-	107319895	107319940	107318476	107318620	107321114	107321193	12675	27	0	75	1	75	72	1	1	1	0.986	0.014
XLOC_002711		1	-	107368204	107368255	107365544	107365676	107368335	107368401	506	75	0	361	5	74	59	1	1	1	0.983	0.017
XLOC_002716		1	-	108452110	108452204	108449801	108449955	108454839	108454941	5174	10	0	58	1	153	73	1	1	1	0.965	0.035
XLOC_001015	ENSGALT00000026084	1	+	108869677	108869748	108868898	108868953	108872707	108872792	10499	2	0	24	4	103	48	0.768882	1	1	0.737	0.263
XLOC_001015	ENSGALT00000026084	1	+	108886772	108886886	108885516	108885673	108887405	108887510	10498	34	1	53	0	173	73	1	1	0.935	1	-0.065
XLOC_002722		1	-	108905096	108906700	108904570	108904974	108908618	108908688	7551	193	0	450	1	1653	63	1	1	1	0.945	0.055
XLOC_001017		1	+	108985233	108985406	108983807	108983884	108986360	108989583	12973	68	0	71	1	229	70	1	1	1	0.956	0.044
XLOC_002725	ENSGALT00000026115	1	-	109076365	109076432	109073014	109073064	109077224	109077291	3003	1	2	65	43	77	30	0.533221	1	0.163	0.371	-0.208
XLOC_002725	ENSGALT00000026115	1	-	109077224	109077291	109076365	109076432	109079951	109080039	3005	5	8	95	80	107	60	0.490133	1	0.26	0.4	-0.14
XLOC_002725	ENSGALT00000026115	1	-	109079678	109079735	109077224	109077291	109079951	109080039	3001	6	5	36	93	87	60	0.193768	1	0.453	0.211	0.242
XLOC_002725	ENSGALT00000026115	1	-	109079678	109079735	109076365	109076432	109079951	109080039	3002	4	8	34	80	87	60	1	1	0.256	0.227	0.029
XLOC_002725	ENSGALT00000026115	1	-	109079678	109079737	109077224	109077291	109079951	109080039	3004	2	5	2	93	91	60	0.211199	1	0.209	0.014	0.195
XLOC_002729	ENSGALT00000026119	1	-	109334856	109334960	109324559	109326362	109341549	109341667	5447	2	0	30	1	163	73	1	1	1	0.931	0.069
XLOC_002729	ENSGALT00000026119	1	-	109352139	109352243	109348044	109348194	109356821	109356972	5448	21	1	55	0	163	73	0.766257	1	0.904	1	-0.096
XLOC_001021		1	+	109413808	109413863	109396285	109396551	109420994	109421099	567	41	2	168	0	96	73	1	1	0.94	1	-0.06
XLOC_001021		1	+	109433579	109433646	109432909	109433046	109434378	109435263	566	221	2	381	0	120	73	1	1	0.985	1	-0.015
XLOC_001022	ENSGALT00000026125	1	+	109531457	109531578	109490993	109491332	109565355	109565582	4300	18	9	25	15	180	73	1	1	0.448	0.403	0.045
XLOC_001025	ENSGALT00000030337	1	+	109666166	109666259	109665244	109665364	109666581	109666738	5487	165	0	127	1	152	73	1	1	1	0.984	0.016
XLOC_002733		1	-	110162321	110162400	110157859	110160402	110162662	110162833	1453	9	25	11	22	144	73	1	1	0.154	0.202	-0.048
XLOC_002733		1	-	110202319	110202475	110201589	110201685	110202914	110203826	1455	117	4	136	5	215	73	1	1	0.909	0.902	0.007
XLOC_002733		1	-	110202914	110203049	110202319	110202475	110203606	110203826	1458	85	5	72	10	194	73	0.348952	1	0.865	0.73	0.135
XLOC_001033	ENSGALT00000043269	1	+	110349557	110349633	110347538	110347708	110357807	110357936	1598	82	12	159	17	138	73	1	1	0.783	0.832	-0.049
XLOC_001033	ENSGALT00000043269	1	+	110357807	110357936	110347551	110347708	110359541	110362439	1597	105	1	145	0	188	73	1	1	0.976	1	-0.024
XLOC_001037	ENSGALT00000036672	1	+	110587836	110587941	110574779	110574917	110588943	110589035	10051	28	1	45	0	164	73	0.964563	1	0.926	1	-0.074
XLOC_002735	ENSGALT00000026158	1	-	110623111	110623269	110622099	110622153	110623684	110623781	7338	3	11	2	9	191	47	1	1	0.063	0.052	0.011
XLOC_002735	ENSGALT00000026158	1	-	110623214	110623269	110622099	110622153	110623684	110623781	7336	0	11	1	9	70	47	0.989952	1	0	0.069	-0.069
XLOC_001040	ENSGALT00000026163	1	+	111261748	111261766	111256720	111256820	111269604	111269726	3897	0	58	2	94	22	73	0.961799	1	0	0.066	-0.066
XLOC_001040	ENSGALT00000026163	1	+	111298729	111298798	111292735	111292804	111300137	111300173	3895	4	1	69	16	69	18	1	1	0.511	0.529	-0.018
XLOC_001040	ENSGALT00000026163	1	+	111298729	111298798	111292735	111292804	111303081	111303278	3896	4	16	69	47	113	62	0.00457791	0.203914	0.121	0.446	-0.325
XLOC_001040	ENSGALT00000026163	1	+	111300137	111300173	111292735	111292804	111303081	111303278	3893	40	16	62	47	47	62	0.255523	1	0.767	0.635	0.132
XLOC_001040	ENSGALT00000026163	1	+	111300137	111300173	111298729	111298798	111303081	111303278	3894	40	1	58	12	47	62	0.138527	1	0.981	0.864	0.117
XLOC_001040	ENSGALT00000026163	1	+	111315566	111315650	111312554	111312757	111320773	111322496	3892	320	0	509	2	146	73	1	1	1	0.992	0.008
XLOC_001045	ENSGALT00000036653	1	+	111738444	111738498	111734935	111737749	111738937	111739121	7562	1	8	6	8	94	73	0.199687	1	0.088	0.368	-0.28
XLOC_001045	ENSGALT00000036653	1	+	111745068	111745422	111744379	111744661	111748514	111748843	7563	60	1	37	1	413	73	1	1	0.914	0.867	0.047
XLOC_001045	ENSGALT00000036653	1	+	111745170	111745422	111744379	111744661	111748514	111748843	7564	37	1	27	1	311	73	1	1	0.897	0.864	0.033
XLOC_001052		1	+	112358181	112358241	112335419	112335590	112364266	112364458	7352	38	0	45	7	106	73	0.0510064	0.804792	1	0.816	0.184
XLOC_002756		1	-	112616354	112616416	112611691	112616143	112623354	112623515	5877	23	0	23	2	110	73	0.507783	1	1	0.884	0.116
XLOC_001065	ENSGALT00000026250	1	+	114199954	114200077	114198876	114199058	114214771	114214960	1116	37	107	14	56	182	73	1	1	0.122	0.091	0.031
XLOC_001065	ENSGALT00000026250	1	+	114319610	114319739	114317639	114317819	114321460	114321631	1114	11	1	15	3	188	73	0.708673	1	0.81	0.66	0.15
XLOC_001065	ENSGALT00000026250	1	+	114319610	114319739	114317639	114317819	114327115	114327238	1115	14	187	10	72	188	73	1	1	0.028	0.051	-0.023
XLOC_001065	ENSGALT00000026250	1	+	114321460	114321631	114319610	114319739	114327115	114327238	1121	52	3	34	3	230	73	0.943639	1	0.846	0.782	0.064
XLOC_001065	ENSGALT00000026250	1	+	114321460	114321631	114317639	114317819	114327115	114327238	1122	53	187	29	72	230	73	1	1	0.083	0.113	-0.03
XLOC_001065	ENSGALT00000026250	1	+	114895770	114895809	114894877	114895014	114901359	114901425	1119	4	19	10	12	50	59	0.100832	1	0.199	0.496	-0.297
XLOC_001065	ENSGALT00000026250	1	+	114895770	114895809	114894877	114895014	114900257	114900323	1120	4	24	13	8	50	59	0.002198	0.124233	0.164	0.657	-0.493
XLOC_001065	ENSGALT00000026250	1	+	114900257	114900323	114894877	114895014	114901359	114901425	1125	35	19	47	12	104	59	0.212472	1	0.511	0.69	-0.179
XLOC_001065	ENSGALT00000026250	1	+	114917529	114917583	114917251	114917344	114923094	114923126	1117	3	1	2	5	47	25	0.251967	1	0.615	0.175	0.44
XLOC_001065	ENSGALT00000026250	1	+	114923094	114923126	114917251	114917344	114930321	114930460	1118	16	28	10	31	50	73	0.466097	1	0.455	0.32	0.135
XLOC_002767		1	-	117540010	117540088	117538095	117538172	117543525	117543615	1557	67	0	80	1	139	70	1	1	1	0.976	0.024
XLOC_002767		1	-	117540742	117540826	117540010	117540088	117543525	117543615	1556	0	47	1	51	144	71	1	1	0	0.01	-0.01
XLOC_002771	ENSGALT00000026338	1	-	117634931	117635075	117634705	117634840	117642975	117643542	1659	112	1	128	0	203	73	1	1	0.976	1	-0.024
XLOC_002771	ENSGALT00000026338	1	-	117635274	117635424	117634927	117635075	117642975	117643542	1660	144	15	126	0	209	73	0.000993233	0.0752159	0.77	1	-0.23
XLOC_002772		1	-	117667853	117668026	117665409	117665780	117669264	117669434	9780	1014	0	1384	2	232	73	1	1	1	0.995	0.005
XLOC_002772		1	-	117676263	117676327	117675631	117675759	117678294	117678432	9779	144	1	156	2	114	73	1	1	0.989	0.98	0.009
XLOC_001075	ENSGALT00000026366	1	+	117721080	117721191	117716948	117716981	117735664	117735772	1171	13	0	121	1	123	26	1	1	1	0.962	0.038
XLOC_001075	ENSGALT00000026366	1	+	117735664	117735772	117729429	117729521	117744837	117744933	1170	70	0	278	4	167	73	1	1	1	0.968	0.032
XLOC_002773	ENSGALT00000036635	1	-	117761182	117761290	117760344	117760446	117761583	117761667	12272	5	25	25	61	167	73	0.686619	1	0.08	0.152	-0.072
XLOC_002773	ENSGALT00000036635	1	-	117761750	117761802	117761583	117761667	117761942	117761976	12271	25	0	31	1	45	27	1	1	1	0.949	0.051
XLOC_001076	ENSGALT00000026377	1	+	117769643	117769670	117768030	117768122	117772559	117772605	10881	4	1	3	3	20	39	0.488553	1	0.886	0.661	0.225
XLOC_001076	ENSGALT00000026377	1	+	117771112	117771177	117770543	117770838	117772559	117772605	10882	0	2	2	0	82	39	0.135306	1	0	1	-1
XLOC_001076	ENSGALT00000026377	1	+	117771112	117771177	117768030	117768122	117772559	117772605	10883	0	1	6	3	82	39	0.388065	1	0	0.487	-0.487
XLOC_002774	ENSGALT00000026387	1	-	117792951	117792998	117789339	117791340	117794037	117794072	11265	0	8	6	167	40	28	1	1	0	0.025	-0.025
XLOC_002777		1	-	118513245	118513310	118507658	118507734	118513442	118513638	10079	0	7	1	4	112	69	0.635793	1	0	0.133	-0.133
XLOC_002777		1	-	118514153	118514339	118513442	118513638	118515527	118515622	10080	5	11	11	15	245	73	0.93038	1	0.119	0.179	-0.06
XLOC_002777		1	-	118525076	118525180	118522690	118522818	118529214	118529353	10081	22	0	28	2	163	73	0.484754	1	1	0.862	0.138
XLOC_002780	ENSGALT00000026441	1	-	118707286	118707433	118697424	118697558	118721907	118721976	12351	21	7	26	6	195	62	0.811964	1	0.488	0.579	-0.091
XLOC_001083		1	+	119216817	119216888	119213610	119213753	119221117	119221206	5654	53	3	218	0	128	73	0.380049	1	0.91	1	-0.09
XLOC_001085	ENSGALT00000026478	1	+	119317286	119317400	119314445	119314523	119317533	119317697	3262	1	44	0	71	171	71	1	1	0.009	0	0.009
XLOC_001085	ENSGALT00000026478	1	+	119325956	119326055	119324947	119325062	119327956	119328067	3259	0	23	1	26	158	73	1	1	0	0.017	-0.017
XLOC_001086		1	+	119383342	119383438	119378451	119378566	119388151	119388307	1984	40	1	100	0	155	73	1	1	0.95	1	-0.05
XLOC_001091		1	+	119867271	119867319	119865425	119865544	119869242	119869410	11698	3	11	5	30	82	73	0.91453	1	0.195	0.129	0.066
XLOC_002785		1	-	119939431	119939554	119938225	119938345	119943714	119943817	8439	21	7	5	6	182	73	0.169005	1	0.546	0.251	0.295
XLOC_002785		1	-	119954066	119954168	119953698	119953804	119957172	119958199	8437	19	4	2	5	161	73	0.0238586	0.5367	0.683	0.154	0.529
XLOC_002785		1	-	119954066	119954165	119953698	119953804	119957172	119958199	8438	16	4	2	5	158	73	0.0390056	0.694052	0.649	0.156	0.493
XLOC_002785		1	-	119978918	119978978	119972488	119972579	119983158	119983295	8435	8	1	12	0	106	73	0.588966	1	0.846	1	-0.154
XLOC_002785		1	-	119980088	119980209	119978918	119978978	119983158	119983295	8436	23	3	25	0	160	53	0.158652	1	0.717	1	-0.283
XLOC_001093	ENSGALT00000026687	1	+	120096208	120096277	120091347	120091455	120101579	120101650	739	3	0	26	7	115	64	0.507743	1	1	0.674	0.326
XLOC_001093	ENSGALT00000026687	1	+	120096208	120096277	120091347	120091455	120106972	120107207	740	4	1	13	0	124	73	0.35071	1	0.702	1	-0.298
XLOC_001093	ENSGALT00000026687	1	+	120101579	120101650	120096208	120096277	120106972	120107207	736	3	2	24	0	117	62	0.0407672	0.712209	0.443	1	-0.557
XLOC_001093	ENSGALT00000026687	1	+	120101579	120101650	120091347	120091455	120106972	120107207	737	2	1	18	0	128	73	0.208587	1	0.533	1	-0.467
XLOC_001093	ENSGALT00000026687	1	+	120127435	120127686	120113117	120113361	120131987	120132123	738	13	7	20	3	310	73	0.176231	1	0.304	0.611	-0.307
XLOC_002791	ENSGALT00000026696	1	-	120716778	120716821	120714417	120714554	120721233	120721299	6591	24	1	18	0	58	59	1	1	0.961	1	-0.039
XLOC_002791	ENSGALT00000026696	1	-	120727202	120727304	120723319	120723389	120728042	120728137	6589	0	16	1	13	151	63	1	1	0	0.031	-0.031
XLOC_001097	ENSGALT00000026698	1	+	120803190	120803319	120801704	120801849	120804090	120804233	9153	0	20	1	38	188	73	1	1	0	0.01	-0.01
XLOC_001100		1	+	121242494	121242603	121233934	121234090	121243803	121243941	9032	87	0	336	1	168	73	1	1	1	0.993	0.007
XLOC_001100		1	+	121253121	121253216	121243803	121243941	121264619	121269879	9033	9	53	21	51	154	73	0.382852	1	0.074	0.163	-0.089
XLOC_001100		1	+	121253121	121253216	121243803	121243941	121260964	121262131	9034	7	4	22	45	154	73	0.150749	1	0.453	0.188	0.265
XLOC_001104	ENSGALT00000026721	1	+	121472834	121472967	121471052	121471185	121474385	121474739	4085	4	0	24	2	192	73	0.808492	1	1	0.82	0.18
XLOC_001108	ENSGALT00000026750	1	+	122249385	122249450	122247485	122247972	122266848	122267101	5550	0	22	3	53	116	73	1	1	0	0.034	-0.034
XLOC_002811		1	-	122860944	122861093	122855562	122859504	122862796	122863399	10209	3	2	4	3	208	73	1	1	0.345	0.319	0.026
XLOC_002811		1	-	122860944	122861051	122855488	122859504	122862796	122863373	10211	2	2	1	3	166	73	0.680208	1	0.305	0.128	0.177
XLOC_002815		1	-	123419578	123419652	123418461	123418544	123420460	123420570	1718	0	7	4	40	134	73	1	1	0	0.052	-0.052
XLOC_002816		1	-	123450307	123450375	123448099	123448147	123450599	123450967	5387	3	25	9	29	90	41	0.705282	1	0.052	0.124	-0.072
XLOC_001114		1	+	123651001	123651107	123609466	123609500	123710016	123710176	13032	0	5	3	6	119	27	0.518853	1	0	0.102	-0.102
XLOC_002818	ENSGALT00000026810	1	-	124285406	124285566	124283828	124283993	124286273	124286425	1485	66	2	71	0	219	73	0.710996	1	0.917	1	-0.083
XLOC_002823	ENSGALT00000021808	1	-	124673378	124673486	124641238	124641346	124724325	124724399	676	29	3	39	1	161	67	0.468695	1	0.801	0.942	-0.141
XLOC_001121	ENSGALT00000026826	1	+	125541075	125541260	125537491	125537618	125545974	125546069	8204	3	4	6	0	244	73	0.0526821	0.807152	0.183	1	-0.817
XLOC_002826		1	-	125776291	125776348	125765941	125766419	125792825	125792947	7849	2	3	0	10	100	73	0.138794	1	0.327	0	0.327
XLOC_002826		1	-	125849261	125849430	125845654	125845807	125855137	125855396	7850	5	15	18	13	228	73	0.0790768	0.974122	0.096	0.307	-0.211
XLOC_001122		1	+	125890510	125890647	125868536	125868794	125892354	125892573	9472	1	7	4	10	196	73	0.801689	1	0.051	0.13	-0.079
XLOC_001122		1	+	125900176	125900406	125892354	125892573	125927682	125932063	9473	87	0	76	7	289	73	0.0147094	0.405671	1	0.733	0.267
XLOC_001123	ENSGALT00000045890	1	+	126270422	126270582	126243934	126243988	126272500	126272584	10755	4	14	2	2	193	47	0.613796	1	0.065	0.196	-0.131
XLOC_001123	ENSGALT00000045890	1	+	126340981	126341041	126289779	126290605	126344603	126344756	10753	19	27	10	9	106	73	0.678312	1	0.326	0.433	-0.107
XLOC_001127		1	+	127806248	127806381	127805497	127805985	127808077	127808127	5707	1	1	2	7	162	43	0.744447	1	0.21	0.07	0.14
XLOC_001127		1	+	127806260	127806381	127805480	127805985	127808077	127808127	5705	1	1	2	7	150	43	0.7322	1	0.223	0.076	0.147
XLOC_002829		1	-	127873070	127873181	127870016	127871459	127874834	127874975	1669	1	0	5	3	170	73	0.645131	1	1	0.417	0.583
XLOC_001130		1	+	128042905	128045081	128035917	128036027	128072872	128072980	5952	551	0	380	3	2235	73	0.14387	1	1	0.805	0.195
XLOC_001130		1	+	128042905	128044993	128035873	128036027	128072872	128072980	5953	548	0	366	3	2147	73	0.140115	1	1	0.806	0.194
XLOC_001130		1	+	128141054	128141156	128086374	128086443	128155463	128155671	5951	66	3	29	2	150	62	1	1	0.901	0.857	0.044
XLOC_001131	ENSGALT00000026928	1	+	128444776	128444863	128441121	128441165	128465782	128468832	4720	11	1	18	0	110	37	0.49146	1	0.787	1	-0.213
XLOC_001131	ENSGALT00000026928	1	+	128444776	128444999	128441121	128441165	128465782	128467287	4723	25	1	34	0	246	37	0.519068	1	0.79	1	-0.21
XLOC_001131	ENSGALT00000026928	1	+	128492957	128493142	128491767	128491930	128495853	128495983	4721	41	0	72	4	244	73	0.274221	1	1	0.843	0.157
XLOC_002834	ENSGALT00000026942	1	-	128545149	128545280	128542024	128542063	128547519	128547689	13066	22	0	26	1	149	32	0.673908	1	1	0.848	0.152
XLOC_002837		1	-	129386890	129386970	129378668	129378776	129389143	129389242	642	13	5	43	3	146	73	0.0843287	0.998583	0.565	0.878	-0.313
XLOC_002837		1	-	129408103	129408311	129407449	129407534	129412140	129412318	643	4	7	4	19	267	73	0.719005	1	0.135	0.054	0.081
XLOC_001137	ENSGALT00000027004	1	+	129642709	129642769	129636224	129636378	129649533	129649616	10698	12	2	12	0	106	73	0.360379	1	0.805	1	-0.195
XLOC_001137	ENSGALT00000027004	1	+	129642709	129642769	129636224	129636378	129646895	129646959	10699	10	0	16	5	90	57	0.134743	1	1	0.67	0.33
XLOC_001137	ENSGALT00000027004	1	+	129646895	129646959	129636224	129636378	129649533	129649616	10700	4	2	23	0	114	73	0.0634746	0.871286	0.562	1	-0.438
XLOC_001137	ENSGALT00000027004	1	+	129646895	129646959	129642709	129642769	129649533	129649616	10701	5	3	22	0	94	53	0.0216769	0.504495	0.484	1	-0.516
XLOC_001138		1	+	129712350	129712461	129711701	129711798	129713015	129713095	9392	22	29	30	51	170	73	1	1	0.246	0.202	0.044
XLOC_001138		1	+	129723518	129723639	129723319	129723404	129724582	129724761	9394	87	2	99	2	180	73	1	1	0.946	0.953	-0.007
XLOC_001139		1	+	129760006	129760154	129758450	129758598	129761822	129761979	8134	3	3	12	0	207	73	0.0285227	0.601366	0.261	1	-0.739
XLOC_001139		1	+	129760452	129760606	129758450	129758598	129761822	129761979	8133	150	3	206	0	213	73	1	1	0.945	1	-0.055
XLOC_002847	ENSGALT00000027011	1	-	129801537	129801634	129800079	129801337	129801733	129801894	8290	1	54	1	126	156	73	1	1	0.009	0.004	0.005
XLOC_001142		1	+	129932961	129933148	129932245	129932417	129933871	129934012	12107	106	0	155	1	246	73	1	1	1	0.979	0.021
XLOC_001142		1	+	129936797	129936905	129935916	129936070	129938043	129938175	12106	75	25	84	40	167	73	0.611314	1	0.567	0.479	0.088
XLOC_001143	ENSGALT00000027021	1	+	129995822	129996059	129979037	129979064	130005189	130005476	13454	4	3	6	4	243	20	1	1	0.099	0.11	-0.011
XLOC_001143	ENSGALT00000027021	1	+	130005189	130005476	129995822	129996059	130028442	130028541	13453	16	0	33	1	346	73	0.821656	1	1	0.874	0.126
XLOC_001147		1	+	131249005	131249152	131242209	131242247	131249753	131249871	4914	7	24	37	31	164	31	0.0558763	0.835164	0.052	0.184	-0.132
XLOC_002855		1	-	131564606	131564639	131560892	131561065	131567412	131567551	11018	16	1	15	2	52	73	1	1	0.957	0.913	0.044
XLOC_002855		1	-	131573388	131573406	131570656	131570840	131575547	131575656	11017	2	34	0	14	22	73	0.596994	1	0.163	0	0.163
XLOC_002855		1	-	131608530	131608670	131589269	131589333	131613980	131614039	11022	36	1	43	6	162	36	0.194366	1	0.889	0.614	0.275
XLOC_002855		1	-	131608542	131608670	131589269	131589333	131613980	131614039	11021	18	1	30	6	150	36	0.343504	1	0.812	0.545	0.267
XLOC_002856		1	-	131663087	131663171	131661240	131661919	131663339	131663843	1048	104	2	185	0	146	73	1	1	0.963	1	-0.037
XLOC_002863	ENSGALT00000036589	1	-	131907866	131907985	131905367	131905622	131910566	131910783	4814	112	1	299	1	178	73	1	1	0.979	0.992	-0.013
XLOC_002864	ENSGALT00000027069	1	-	131970721	131971063	131969098	131969228	131973870	131973987	6033	21	2	8	4	401	73	0.14747	1	0.657	0.267	0.39
XLOC_001158	ENSGALT00000036585	1	+	132690850	132690964	132689819	132689940	132699994	132700113	8477	17	0	10	2	173	73	0.196245	1	1	0.678	0.322
XLOC_002873		1	-	132823236	132823266	132820969	132821165	132823785	132823882	4954	0	10	11	33	46	73	0.091403	1	0	0.346	-0.346
XLOC_001162	ENSGALT00000008104	1	+	133056955	133057186	133054803	133054965	133058098	133058205	180	114	57	137	26	290	73	0.00379941	0.178412	0.335	0.57	-0.235
XLOC_001162	ENSGALT00000008104	1	+	133056961	133057186	133054803	133054965	133058098	133058205	181	96	57	98	26	284	73	0.0310276	0.628437	0.302	0.492	-0.19
XLOC_001162	ENSGALT00000008104	1	+	133059147	133059299	133057878	133058205	133059990	133060088	182	86	1	69	0	211	73	1	1	0.967	1	-0.033
XLOC_001162	ENSGALT00000008104	1	+	133063378	133063570	133062094	133062215	133065953	133066071	183	23	56	20	28	251	73	0.759811	1	0.107	0.172	-0.065
XLOC_001166		1	+	133164972	133165047	133163681	133163899	133167471	133167555	5091	4	1	29	0	136	73	0.270762	1	0.682	1	-0.318
XLOC_001166		1	+	133164972	133165095	133163703	133163899	133167471	133167555	5092	6	1	11	0	182	73	0.432243	1	0.706	1	-0.294
XLOC_001166		1	+	133175558	133175650	133175081	133175147	133177886	133178200	5093	0	8	1	7	137	59	1	1	0	0.058	-0.058
XLOC_001166		1	+	133177886	133177967	133175081	133175147	133178079	133178200	5094	16	8	27	32	132	59	0.213314	1	0.472	0.274	0.198
XLOC_001167	ENSGALT00000036577	1	+	133200931	133201052	133200415	133200481	133203126	133203275	6394	2	0	1	1	166	59	0.455018	1	1	0.262	0.738
XLOC_001168	ENSGALT00000027103	1	+	133233573	133233644	133230743	133230836	133235345	133235547	7605	283	1	335	4	128	73	1	1	0.994	0.979	0.015
XLOC_001168	ENSGALT00000027103	1	+	133239988	133240140	133239767	133239900	133247296	133247437	7603	89	2	238	0	211	73	1	1	0.939	1	-0.061
XLOC_001168	ENSGALT00000027103	1	+	133247296	133247437	133239988	133240140	133248089	133248248	7604	37	1	54	0	200	73	0.923907	1	0.931	1	-0.069
XLOC_001169		1	+	133261317	133261465	133259700	133259832	133261999	133262111	8840	5	0	4	1	207	73	0.494333	1	1	0.585	0.415
XLOC_001169		1	+	133261390	133261465	133259473	133259832	133261999	133262111	8841	2	0	2	1	136	73	0.569952	1	1	0.518	0.482
XLOC_001169		1	+	133261393	133261465	133259700	133259832	133261999	133262111	8839	2	0	2	1	130	73	0.570637	1	1	0.529	0.471
XLOC_001178	ENSGALT00000027114	1	+	134399127	134399307	134393339	134393708	134406692	134406755	6579	87	0	157	1	222	56	1	1	1	0.975	0.025
XLOC_002883		1	-	134508473	134508532	134502241	134502416	134510003	134510178	6916	2	284	3	256	104	73	1	1	0.005	0.008	-0.003
XLOC_002883		1	-	134510003	134510178	134502241	134502416	134521735	134522214	6914	552	0	898	1	234	73	1	1	1	0.996	0.004
XLOC_002883		1	-	134510003	134510183	134502241	134502416	134521735	134522264	6915	822	0	1651	1	239	73	1	1	1	0.998	0.002
XLOC_001181		1	+	134562125	134562187	134561732	134561839	134567209	134567636	6055	11	2	17	0	110	73	0.260164	1	0.785	1	-0.215
XLOC_001182		1	+	134706301	134707023	134687483	134687725	134714521	134716157	2406	699	2	863	1	781	73	1	1	0.97	0.988	-0.018
XLOC_001189	ENSGALT00000027129	1	+	135543262	135543332	135540042	135542588	135544584	135544685	9545	50	1	48	0	126	73	1	1	0.967	1	-0.033
XLOC_001190	ENSGALT00000022889	1	+	135631361	135631552	135631032	135631108	135631908	135633755	4287	7	15	7	71	246	69	0.389306	1	0.116	0.027	0.089
XLOC_001191	ENSGALT00000036568	1	+	135774461	135774599	135773869	135774031	135774686	135774833	3080	124	1	284	0	197	73	1	1	0.979	1	-0.021
XLOC_001200	ENSGALT00000027149	1	+	136359078	136359185	136345768	136345969	136381566	136381684	3487	0	13	4	24	166	73	0.911306	1	0	0.068	-0.068
XLOC_001200	ENSGALT00000027149	1	+	136393350	136393454	136381566	136381684	136405977	136406072	3489	175	2	181	4	163	73	1	1	0.975	0.953	0.022
XLOC_001200	ENSGALT00000027149	1	+	136467722	136467805	136466664	136466771	136471603	136471815	3488	76	0	107	2	146	73	1	1	1	0.964	0.036
XLOC_002894	ENSGALT00000027160	1	-	136660649	136660756	136656141	136656263	136686937	136686986	12622	28	1	75	0	135	42	0.711219	1	0.897	1	-0.103
XLOC_002894	ENSGALT00000027160	1	-	136673677	136673744	136660649	136660756	136686937	136687143	12623	43	0	88	1	120	73	1	1	1	0.982	0.018
XLOC_002894	ENSGALT00000027160	1	-	136673677	136673744	136656141	136656263	136686937	136687143	12624	12	1	28	0	120	73	0.632476	1	0.88	1	-0.12
XLOC_002895	ENSGALT00000043071	1	-	136717276	136717351	136716547	136716739	136719648	136719828	11382	4	49	5	42	136	73	1	1	0.042	0.06	-0.018
XLOC_001203	ENSGALT00000043785	1	+	136737868	136737989	136731866	136731997	136742803	136742886	7569	6	5	8	30	180	73	0.141669	1	0.327	0.098	0.229
XLOC_001203	ENSGALT00000043785	1	+	136737892	136737989	136731810	136731997	136742803	136742886	7567	23	5	22	30	156	73	0.00246608	0.133765	0.683	0.255	0.428
XLOC_002897		1	-	136865741	136865827	136864758	136864866	136866143	136866785	472	32	2	22	2	146	73	1	1	0.889	0.846	0.043
XLOC_002903		1	-	137113716	137113831	137108204	137112249	137118112	137118278	12823	6	32	2	40	174	73	0.997505	1	0.073	0.021	0.052
XLOC_002903		1	-	137113727	137113831	137108204	137112249	137118112	137118278	12822	4	32	2	40	163	73	1	1	0.053	0.022	0.031
XLOC_002905		1	-	138144353	138144531	138140909	138141024	138145148	138145361	10405	7803	0	3660	3	237	73	1	1	1	0.997	0.003
XLOC_001220		1	+	138367000	138367222	138365529	138365637	138369192	138369354	4004	5111	1	2221	0	281	73	1	1	0.999	1	-0.001
XLOC_001220		1	+	138375746	138375854	138374690	138374798	138377331	138377403	4005	1958	0	1155	1	159	65	1	1	1	0.998	0.002
XLOC_002907	ENSGALT00000027215	1	-	138516596	138516650	138513825	138513964	138517158	138517225	7819	0	9	1	19	81	60	1	1	0	0.038	-0.038
XLOC_002910	ENSGALT00000027220	1	-	138593719	138593845	138585910	138589129	138596031	138597067	4163	7	0	2	1	185	73	0.304295	1	1	0.441	0.559
XLOC_001224	ENSGALT00000027224	1	+	138736156	138736333	138732833	138732923	138744410	138744510	7814	6	29	3	52	236	73	1	1	0.06	0.018	0.042
XLOC_002914	ENSGALT00000027228	1	-	139445218	139445369	139440676	139443593	139445464	139445577	12595	163	0	563	1	210	73	1	1	1	0.995	0.005
XLOC_002915	ENSGALT00000027229	1	-	139470027	139470063	139464150	139466283	139471548	139471654	453	3	0	20	3	58	73	0.843889	1	1	0.894	0.106
XLOC_002920		1	-	142021686	142021870	142021463	142021579	142022080	142022256	5132	4	9	22	20	243	73	0.40315	1	0.118	0.248	-0.13
XLOC_002921	ENSGALT00000027238	1	-	142029883	142029955	142028921	142029005	142033173	142033306	3946	29	18	71	32	130	73	0.756909	1	0.475	0.555	-0.08
XLOC_002922	ENSGALT00000027242	1	-	142058613	142058820	142057565	142057884	142060292	142060344	7625	18	3	24	2	238	45	0.657549	1	0.531	0.694	-0.163
XLOC_002922	ENSGALT00000027242	1	-	142058613	142058816	142057710	142057884	142060292	142060344	7626	18	3	28	2	234	45	0.553192	1	0.536	0.729	-0.193
XLOC_002923	ENSGALT00000027245	1	-	142118726	142118765	142112321	142112473	142120679	142120758	6424	2	2	2	14	63	72	0.241922	1	0.533	0.14	0.393
XLOC_001247		1	+	143154043	143154260	143151840	143151956	143158178	143158266	6973	52	0	81	1	276	73	1	1	1	0.955	0.045
XLOC_001247		1	+	143154180	143154260	143151840	143151956	143158178	143158266	6972	17	0	21	1	146	73	0.879071	1	1	0.913	0.087
XLOC_001247		1	+	143158178	143158266	143154043	143154260	143168690	143168788	6974	32	0	46	1	147	73	1	1	1	0.958	0.042
XLOC_002925		1	-	143400848	143400971	143399789	143399884	143404997	143405100	8896	1	9	0	25	182	73	1	1	0.043	0	0.043
XLOC_002928	ENSGALT00000027267	1	-	143740773	143740925	143739620	143739732	143742427	143742587	8670	145	0	527	3	211	73	1	1	1	0.984	0.016
XLOC_001250		1	+	143841672	143842537	143835024	143837154	143846200	143848287	1859	25	26	30	22	924	73	1	1	0.071	0.097	-0.026
XLOC_001252	ENSGALT00000027273	1	+	143990968	143991048	143989785	143989908	143991128	143991316	9748	53	1	74	0	146	73	1	1	0.964	1	-0.036
XLOC_001252	ENSGALT00000027273	1	+	144018784	144018828	144018207	144018275	144024126	144024242	9747	1	6	10	21	62	61	0.517481	1	0.141	0.319	-0.178
XLOC_001252	ENSGALT00000027273	1	+	144034519	144034555	144033745	144033859	144035341	144035488	9745	5	9	1	18	58	73	0.07009	0.908333	0.411	0.065	0.346
XLOC_001254		1	+	144117496	144117633	144106280	144106511	144131223	144131280	10349	19	2	14	8	173	50	0.0773352	0.957931	0.733	0.336	0.397
XLOC_001254		1	+	144119664	144119800	144117496	144117633	144131223	144131280	10348	5	3	2	2	172	50	0.882084	1	0.326	0.225	0.101
XLOC_002935		1	-	144592761	144592856	144576521	144579554	144597390	144597544	2557	3	3	7	3	154	73	0.599121	1	0.322	0.525	-0.203
XLOC_001259	ENSGALT00000027302	1	+	145225974	145226118	145225532	145225570	145229964	145230040	13077	1	0	1	1	157	27	0.617481	1	1	0.147	0.853
XLOC_001259	ENSGALT00000027302	1	+	145241222	145241367	145240490	145240553	145241781	145241922	13079	3	19	0	34	187	56	1	1	0.045	0	0.045
XLOC_001261		1	+	145386198	145386448	145383360	145383486	145389263	145389368	12052	77	0	107	1	309	73	1	1	1	0.962	0.038
XLOC_001261		1	+	145486654	145486760	145476860	145477033	145500692	145500827	12053	29	2	51	0	165	73	0.361468	1	0.865	1	-0.135
XLOC_001261		1	+	145486659	145486760	145476860	145477033	145500692	145500827	12051	17	2	36	0	160	73	0.216512	1	0.795	1	-0.205
XLOC_001262	ENSGALT00000027315	1	+	145693748	145693817	145693296	145693363	145695861	145695952	9675	2	1	70	1	111	60	0.199969	1	0.519	0.974	-0.455
XLOC_001270	ENSGALT00000027331	1	+	152348118	152348247	152345131	152345203	152350276	152350351	6566	22	36	68	71	175	60	0.648708	1	0.173	0.247	-0.074
XLOC_001272	ENSGALT00000027336	1	+	152719314	152719396	152718485	152718728	152720392	152720641	2324	0	30	3	31	146	73	1	1	0	0.046	-0.046
XLOC_002951		1	-	153275421	153275496	153274054	153274163	153277775	153277865	9539	40	2	169	2	136	73	0.870917	1	0.915	0.978	-0.063
XLOC_002951		1	-	153280781	153280838	153279246	153279306	153282004	153282064	9537	11	0	90	1	60	33	1	1	1	0.98	0.02
XLOC_002951		1	-	153301373	153301439	153297556	153297622	153303289	153303358	9538	64	1	206	0	93	48	1	1	0.971	1	-0.029
XLOC_002951		1	-	153303289	153303358	153297556	153297622	153308601	153308670	9540	26	4	66	2	99	48	0.214029	1	0.759	0.941	-0.182
XLOC_001275		1	+	153500261	153500369	153489813	153489915	153506981	153507101	9462	230	30	230	20	167	73	0.779475	1	0.77	0.834	-0.064
XLOC_001275		1	+	153509472	153509597	153507530	153507612	153513800	153513918	9460	7	48	3	36	184	73	1	1	0.055	0.032	0.023
XLOC_001275		1	+	153559126	153559243	153554335	153554433	153569864	153569997	9467	48	7	55	6	176	73	1	1	0.74	0.792	-0.052
XLOC_001275		1	+	153560009	153560150	153559126	153559243	153569864	153569997	9470	64	0	61	1	200	73	1	1	1	0.957	0.043
XLOC_001275		1	+	153566126	153566201	153560009	153560150	153568731	153568956	9458	10	13	10	15	136	73	1	1	0.292	0.264	0.028
XLOC_001275		1	+	153566126	153566201	153554335	153554433	153568731	153568956	9459	9	8	12	17	136	73	0.7237	1	0.377	0.275	0.102
XLOC_001275		1	+	153568731	153568956	153560009	153560150	153569864	153569997	9463	253	10	152	7	284	73	1	1	0.867	0.848	0.019
XLOC_001275		1	+	153568731	153568956	153554335	153554433	153569864	153569997	9464	248	7	154	6	284	73	1	1	0.901	0.868	0.033
XLOC_001275		1	+	153568731	153568848	153560009	153560150	153569864	153569997	9469	33	10	25	7	176	73	1	1	0.578	0.597	-0.019
XLOC_001275		1	+	153576649	153576811	153571820	153571946	153585949	153587590	9466	91	30	119	25	221	73	0.423747	1	0.5	0.611	-0.111
XLOC_001275		1	+	153583148	153583250	153571820	153571946	153585949	153587590	9465	1	30	1	25	161	73	1	1	0.015	0.018	-0.003
XLOC_001275		1	+	153589498	153589743	153588778	153588948	153590867	153591035	9461	160	0	169	1	304	73	1	1	1	0.976	0.024
XLOC_002954	ENSGALT00000027355	1	-	154065782	154065891	154064518	154064621	154067210	154067483	13369	52	0	62	2	168	73	0.948778	1	1	0.931	0.069
XLOC_002954	ENSGALT00000027355	1	-	154097897	154097927	154095093	154095211	154102394	154102647	13363	7	0	29	6	46	73	0.467965	1	1	0.885	0.115
XLOC_002954	ENSGALT00000027355	1	-	154099454	154100174	154097897	154097927	154102394	154102647	13364	84	6	23	14	729	23	0.00129058	0.0834659	0.306	0.049	0.257
XLOC_002954	ENSGALT00000027355	1	-	154101003	154101294	154099454	154100174	154102394	154102647	13373	19	0	8	1	350	73	0.35658	1	1	0.625	0.375
XLOC_002954	ENSGALT00000027355	1	-	154101620	154101920	154101003	154101294	154102394	154102647	13366	38	1	18	0	359	73	0.849913	1	0.885	1	-0.115
XLOC_002954	ENSGALT00000027355	1	-	154104522	154104636	154103839	154104038	154105033	154105064	13368	45	0	64	2	124	24	0.500005	1	1	0.861	0.139
XLOC_002955		1	-	154226805	154226853	154201590	154201666	154227726	154227812	1081	31	0	177	1	78	69	1	1	1	0.994	0.006
XLOC_002955		1	-	154226816	154226853	154201590	154201666	154227726	154227812	1082	18	0	103	1	56	69	1	1	1	0.992	0.008
XLOC_001279	ENSGALT00000027361	1	+	154343667	154343772	154339290	154339380	154345927	154346060	4472	36	1	32	0	164	73	1	1	0.941	1	-0.059
XLOC_001279	ENSGALT00000027361	1	+	154356526	154356676	154354305	154354532	154364074	154364235	4471	12	28	9	33	209	73	1	1	0.13	0.087	0.043
XLOC_001280		1	+	154986814	154986874	154973874	154974010	155028245	155028403	717	9	20	11	11	106	73	0.353742	1	0.237	0.408	-0.171
XLOC_002958	ENSGALT00000027367	1	-	155317439	155317524	155298591	155298771	155324683	155324814	4819	23	2	14	1	146	73	1	1	0.852	0.875	-0.023
XLOC_002959	ENSGALT00000027371	1	-	155445054	155445232	155442014	155443406	155446601	155446733	6040	8	0	71	5	237	73	0.644993	1	1	0.814	0.186
XLOC_002969	ENSGALT00000023466	1	-	161033300	161033398	161032377	161032473	161038363	161038505	13016	6	4	7	0	157	73	0.0912815	1	0.411	1	-0.589
XLOC_002969	ENSGALT00000023466	1	-	161043952	161044072	161042825	161042971	161049737	161049931	13012	173	1	114	0	179	73	1	1	0.986	1	-0.014
XLOC_002969	ENSGALT00000023466	1	-	161050569	161050867	161049737	161049931	161052450	161052642	13017	158	0	94	1	357	73	1	1	1	0.951	0.049
XLOC_002969	ENSGALT00000023466	1	-	161050581	161050867	161049737	161049931	161052450	161052642	13014	170	0	97	1	345	73	1	1	1	0.954	0.046
XLOC_002969	ENSGALT00000023466	1	-	161054228	161054473	161052450	161052642	161055729	161055948	13013	34	0	53	1	304	73	0.991784	1	1	0.927	0.073
XLOC_001296	ENSGALT00000027377	1	+	161708142	161708175	161696599	161697060	161720544	161720718	4242	2	4	4	1	52	73	0.220451	1	0.412	0.849	-0.437
XLOC_002978	ENSGALT00000036497	1	-	165052877	165052948	165049590	165049644	165053305	165053375	1854	17	0	222	1	92	37	1	1	1	0.989	0.011
XLOC_002979	ENSGALT00000027391	1	-	165072287	165072480	165070687	165071155	165075496	165075580	3142	88	1	140	0	252	73	1	1	0.962	1	-0.038
XLOC_002979	ENSGALT00000027391	1	-	165098265	165098344	165097857	165098162	165098557	165099094	3143	5	0	4	1	144	73	0.5083	1	1	0.67	0.33
XLOC_002979	ENSGALT00000027391	1	-	165121649	165121751	165097857	165098162	165123270	165123352	3141	2	0	2	3	161	73	0.268938	1	1	0.232	0.768
XLOC_002980	ENSGALT00000027399	1	-	165173109	165173208	165172542	165172765	165174515	165174652	12800	62	7	94	6	158	73	0.768506	1	0.804	0.879	-0.075
XLOC_002980	ENSGALT00000027399	1	-	165174515	165174652	165172600	165172765	165176346	165176464	12801	58	1	64	0	196	73	1	1	0.956	1	-0.044
XLOC_001304	ENSGALT00000027401	1	+	165220255	165220284	165218979	165219099	165221255	165221351	10735	1	14	8	11	44	73	0.0399862	0.705898	0.106	0.547	-0.441
XLOC_001304	ENSGALT00000027401	1	+	165223934	165224035	165220321	165221351	165224715	165224822	10732	4	23	1	50	160	73	0.763544	1	0.074	0.009	0.065
XLOC_001304	ENSGALT00000027401	1	+	165223934	165224039	165221255	165221351	165224715	165224822	10733	2	23	0	50	164	73	1	1	0.037	0	0.037
XLOC_001304	ENSGALT00000027401	1	+	165223991	165224035	165221255	165221351	165224715	165224822	10737	2	23	1	50	74	73	0.939554	1	0.079	0.019	0.06
XLOC_002981		1	-	165459357	165459488	165457117	165457228	165470061	165470139	11596	77	1	54	0	188	71	1	1	0.967	1	-0.033
XLOC_001307		1	+	165669131	165669262	165667610	165667719	165674922	165674980	1007	1	15	0	11	168	51	1	1	0.02	0	0.02
XLOC_001311	ENSGALT00000036494	1	+	165732924	165733038	165728143	165728299	165733764	165733811	21	18	2	41	14	140	40	0.243641	1	0.72	0.456	0.264
XLOC_001311	ENSGALT00000036494	1	+	165732954	165733038	165728143	165728299	165733764	165734003	20	77	2	107	14	146	73	0.0919925	1	0.951	0.793	0.158
XLOC_001311	ENSGALT00000036494	1	+	165732954	165733042	165728143	165728299	165733764	165733811	22	66	2	70	14	114	40	0.0182359	0.449285	0.921	0.637	0.284
XLOC_001313		1	+	166040716	166040768	166031301	166031620	166042673	166042747	10931	29	0	85	6	84	67	0.552238	1	1	0.919	0.081
XLOC_001313		1	+	166054433	166054680	166052324	166052395	166055368	166056686	10930	5	1	7	16	297	64	0.0740679	0.934673	0.519	0.086	0.433
XLOC_002986		1	-	166110152	166110209	166094786	166095081	166114759	166114867	5292	18	0	26	3	100	73	0.37328	1	1	0.864	0.136
XLOC_002990	ENSGALT00000046228	1	-	166719738	166719790	166717803	166719159	166719919	166720109	444	41	0	49	1	90	73	1	1	1	0.975	0.025
XLOC_002992		1	-	166917305	166917398	166913300	166913566	166924744	166924821	2917	44	0	153	1	149	70	1	1	1	0.986	0.014
XLOC_001319	ENSGALT00000027426	1	+	166973169	166973188	166972603	166972677	166974515	166974660	9956	2	2	8	10	18	67	1	1	0.788	0.749	0.039
XLOC_001319	ENSGALT00000027426	1	+	166983058	166983097	166974515	166974660	167005244	167005326	9957	3	0	21	1	64	73	1	1	1	0.96	0.04
XLOC_001321		1	+	167115634	167115762	167113929	167114005	167116707	167116806	5028	16	0	52	1	183	69	1	1	1	0.951	0.049
XLOC_003034	ENSGALT00000027439	1	-	167274128	167274302	167270954	167271265	167275647	167275845	6779	106	0	137	2	233	73	1	1	1	0.955	0.045
XLOC_003034	ENSGALT00000027439	1	-	167274128	167274221	167270954	167271265	167275647	167275845	6782	31	0	44	2	152	73	0.719651	1	1	0.914	0.086
XLOC_003034	ENSGALT00000027439	1	-	167282437	167282495	167281373	167281482	167288306	167288429	6783	8	66	1	56	102	73	0.62887	1	0.08	0.013	0.067
XLOC_003034	ENSGALT00000027439	1	-	167293611	167293721	167288306	167288418	167294160	167295077	6781	107	5	74	0	169	73	0.343069	1	0.902	1	-0.098
XLOC_003034	ENSGALT00000027439	1	-	167293639	167293721	167288306	167288418	167294160	167294353	6776	31	5	24	0	146	73	0.101697	1	0.756	1	-0.244
XLOC_003037	ENSGALT00000027446	1	-	167416103	167416236	167415703	167415846	167416616	167416659	10574	17	1	18	0	155	36	0.576005	1	0.798	1	-0.202
XLOC_001337	ENSGALT00000027449	1	+	167580486	167580576	167578377	167578464	167580679	167580716	9498	11	0	13	7	106	30	0.0344147	0.653726	1	0.345	0.655
XLOC_001337	ENSGALT00000027449	1	+	167608506	167608764	167600498	167600576	167618984	167619147	9509	12	4	9	7	315	71	0.454659	1	0.403	0.225	0.178
XLOC_003038	ENSGALT00000027451	1	-	167631412	167631488	167630825	167630914	167631800	167631833	1878	109	1	124	0	91	26	1	1	0.969	1	-0.031
XLOC_003040	ENSGALT00000027453	1	-	167960723	167960907	167951700	167951800	167962580	167962710	3121	279	0	719	2	243	73	1	1	1	0.991	0.009
XLOC_003074		1	-	168140475	168140666	168138115	168138242	168142403	168142546	7466	23	3	40	0	250	73	0.0855124	1	0.691	1	-0.309
XLOC_003074		1	-	168147733	168147884	168146418	168146585	168148356	168148515	7467	76	0	62	1	210	73	1	1	1	0.956	0.044
XLOC_003074		1	-	168150856	168151209	168149811	168149872	168151559	168151653	7469	7	4	6	13	393	54	0.360113	1	0.194	0.06	0.134
XLOC_003075		1	-	168487022	168487233	168478427	168478578	168501323	168501523	8692	36	0	38	1	270	73	0.849644	1	1	0.911	0.089
XLOC_001347	ENSGALT00000030139	1	+	168531614	168531722	168529943	168530218	168533124	168533258	1183	9	0	19	1	167	73	0.871833	1	1	0.893	0.107
XLOC_001347	ENSGALT00000030139	1	+	168535470	168535517	168533124	168533258	168537154	168537213	1182	1	0	28	1	59	52	1	1	1	0.961	0.039
XLOC_003076	ENSGALT00000027473	1	-	168560267	168560446	168558990	168559141	168563032	168563090	9993	15	6	33	13	216	51	1	1	0.371	0.375	-0.004
XLOC_003076	ENSGALT00000027473	1	-	168560267	168560446	168558990	168559141	168562650	168562777	9994	15	17	33	13	238	73	0.0907692	1	0.213	0.438	-0.225
XLOC_003076	ENSGALT00000027473	1	-	168562650	168562836	168558990	168559141	168563032	168563134	9995	25	6	39	13	245	73	0.834438	1	0.554	0.472	0.082
XLOC_003077	ENSGALT00000027475	1	-	168587939	168587984	168584787	168584919	168588714	168588884	11220	38	1	42	0	76	73	1	1	0.973	1	-0.027
XLOC_003084	ENSGALT00000027488	1	-	169400752	169400897	169400478	169400621	169401828	169401955	12166	2	49	3	38	204	73	1	1	0.014	0.027	-0.013
XLOC_003084	ENSGALT00000027488	1	-	169402063	169402279	169401828	169401955	169403893	169404004	12167	87	7	96	3	275	73	0.422058	1	0.767	0.895	-0.128
XLOC_003089	ENSGALT00000027507	1	-	169692907	169693024	169692776	169692820	169693531	169695494	2542	3	0	2	2	140	37	0.268458	1	1	0.209	0.791
XLOC_001360	ENSGALT00000027510	1	+	169716272	169716343	169712404	169712473	169717976	169718091	7916	7	0	69	1	117	62	1	1	1	0.973	0.027
XLOC_001361		1	+	169744458	169744546	169740773	169740818	169746468	169746615	9167	0	5	1	0	112	38	0.212044	1	0	1	-1
XLOC_001361		1	+	169761237	169761396	169752721	169753706	169764939	169768378	9166	22	0	10	3	218	73	0.0550942	0.827152	1	0.527	0.473
XLOC_001362		1	+	169801518	169801614	169801101	169801199	169802082	169802153	5432	11	0	118	3	146	64	1	1	1	0.945	0.055
XLOC_003099		1	-	169814967	169815226	169810232	169810370	169818848	169818978	103	18	0	108	1	318	73	1	1	1	0.961	0.039
XLOC_001374	ENSGALT00000036466	1	+	171315383	171315431	171313528	171313574	171317918	171318014	11978	27	16	113	93	48	39	0.721438	1	0.578	0.497	0.081
XLOC_001374	ENSGALT00000036466	1	+	171315383	171315431	171313528	171313574	171318613	171318703	11979	2	4	16	52	48	39	0.853699	1	0.289	0.2	0.089
XLOC_001374	ENSGALT00000036466	1	+	171317918	171318014	171313528	171313574	171318613	171318703	11974	126	4	444	52	121	39	0.0330001	0.641498	0.91	0.733	0.177
XLOC_001374	ENSGALT00000036466	1	+	171317918	171318014	171315383	171315431	171318613	171318703	11975	137	2	456	8	123	41	1	1	0.958	0.95	0.008
XLOC_001374	ENSGALT00000036466	1	+	171320598	171320679	171320211	171320289	171322706	171322793	11980	74	1	176	3	144	71	1	1	0.973	0.967	0.006
XLOC_001374	ENSGALT00000036466	1	+	171320598	171320679	171320211	171320289	171324761	171324803	11981	43	10	138	88	106	33	0.0275709	0.58499	0.572	0.328	0.244
XLOC_001374	ENSGALT00000036466	1	+	171322706	171322793	171320598	171320679	171324761	171324803	11976	49	5	103	36	108	35	0.0300601	0.614857	0.761	0.481	0.28
XLOC_001374	ENSGALT00000036466	1	+	171322706	171322793	171320211	171320289	171324761	171324803	11977	14	10	32	88	106	33	0.0455468	0.760168	0.304	0.102	0.202
XLOC_001375	ENSGALT00000036465	1	+	171595874	171595907	171594109	171594267	171597787	171597905	714	4	0	16	1	52	73	1	1	1	0.957	0.043
XLOC_001378		1	+	171925141	171925246	171923967	171924165	171926905	171927035	3542	8	9	15	26	164	73	0.809335	1	0.283	0.204	0.079
XLOC_001378		1	+	171928773	171928864	171928535	171928694	171931129	171933129	3544	37	2	42	0	150	73	0.565568	1	0.9	1	-0.1
XLOC_001378		1	+	171929816	171929875	171928773	171928864	171931129	171933099	3543	0	22	1	21	104	73	1	1	0	0.032	-0.032
XLOC_001380		1	+	172201868	172202015	172195699	172195819	172206186	172206320	9249	1	0	55	1	206	73	1	1	1	0.951	0.049
XLOC_003114	ENSGALT00000027556	1	-	172319596	172319776	172317810	172317882	172321335	172321425	12645	11	0	10	1	231	65	0.537605	1	1	0.738	0.262
XLOC_003114	ENSGALT00000027556	1	-	172319596	172319789	172317810	172317882	172321335	172321425	12646	13	0	14	1	244	65	0.597008	1	1	0.789	0.211
XLOC_003114	ENSGALT00000027556	1	-	172456499	172456538	172445529	172445666	172459547	172459691	12641	1	8	1	2	64	73	0.607667	1	0.125	0.363	-0.238
XLOC_003114	ENSGALT00000027556	1	-	172597249	172597345	172584586	172585025	172598720	172598889	12648	24	9	14	6	155	73	1	1	0.557	0.524	0.033
XLOC_003122		1	-	173658245	173658347	173655717	173655859	173658440	173658883	7788	2	8	41	11	161	73	0.00167674	0.104424	0.102	0.628	-0.526
XLOC_003122		1	-	173684750	173684819	173680078	173680215	173685950	173686109	7787	70	0	97	1	124	73	1	1	1	0.983	0.017
XLOC_003122		1	-	173699098	173699210	173698591	173698705	173700262	173700414	7789	1	35	1	48	171	73	1	1	0.012	0.009	0.003
XLOC_001502	ENSGALT00000027574	1	+	173776422	173776547	173765431	173766849	173780411	173780500	308	45	1	62	1	184	73	1	1	0.947	0.961	-0.014
XLOC_003126	ENSGALT00000027584	1	-	174216536	174216606	174212630	174212744	174217532	174217664	12772	49	0	25	1	126	73	1	1	1	0.935	0.065
XLOC_003126	ENSGALT00000027584	1	-	174228774	174228886	174223840	174223977	174231709	174231786	12773	42	1	14	0	168	70	1	1	0.946	1	-0.054
XLOC_001506	ENSGALT00000027586	1	+	174279623	174279755	174278499	174278856	174280497	174280635	9457	89	8	242	3	191	73	0.0495282	0.798866	0.81	0.969	-0.159
XLOC_003127	ENSGALT00000044379	1	-	174340256	174340356	174339099	174339170	174344639	174344859	624	8	0	11	1	150	64	0.679925	1	1	0.824	0.176
XLOC_001510		1	+	174715902	174716027	174713798	174713973	174717552	174717775	8995	13	0	55	1	184	73	1	1	1	0.956	0.044
XLOC_003135	ENSGALT00000027609	1	-	175200382	175200512	175197338	175197403	175201410	175201550	3115	147	3	134	1	174	58	1	1	0.942	0.978	-0.036
XLOC_003135	ENSGALT00000027609	1	-	175206593	175206753	175201410	175201550	175207248	175207336	3116	4	32	12	55	219	73	1	1	0.04	0.068	-0.028
XLOC_003135	ENSGALT00000027609	1	-	175229045	175229145	175224058	175224209	175232645	175232802	3112	5	51	2	36	159	73	1	1	0.043	0.025	0.018
XLOC_003135	ENSGALT00000027609	1	-	175241944	175242007	175232645	175232807	175244191	175244262	3114	32	1	52	3	103	64	1	1	0.952	0.915	0.037
XLOC_003138	ENSGALT00000027621	1	-	175514669	175514899	175514539	175514593	175515284	175515472	12735	88	0	180	2	263	47	1	1	1	0.941	0.059
XLOC_003140	ENSGALT00000045278	1	-	175575409	175575471	175574386	175574499	175576040	175576119	4589	4264	0	17954	1	109	72	1	1	1	1	0
XLOC_003143		1	-	175774765	175774932	175773725	175774060	175782459	175782577	8306	27	0	9	1	226	73	0.37134	1	1	0.744	0.256
XLOC_003143		1	-	175774765	175774932	175773725	175774060	175776628	175776804	8307	17	0	6	1	226	73	0.342406	1	1	0.66	0.34
XLOC_003143		1	-	175776628	175776804	175773172	175774060	175782459	175782577	8303	2	0	9	1	235	73	0.869446	1	1	0.737	0.263
XLOC_003143		1	-	175776628	175776804	175774765	175774932	175782459	175782577	8304	2	10	8	3	235	73	0.0241541	0.541536	0.058	0.453	-0.395
XLOC_003143		1	-	175814386	175814511	175812922	175813023	175831509	175831517	8302	5	0	12	1	112	1	0.737132	1	1	0.097	0.903
XLOC_003144	ENSGALT00000027628	1	-	175897991	175898049	175895082	175895214	175915329	175915470	13100	2	0	5	2	102	73	0.570256	1	1	0.641	0.359
XLOC_001521		1	+	176007935	176008080	175998261	175998387	176021236	176021336	12320	4	0	52	1	204	73	1	1	1	0.949	0.051
XLOC_003148	ENSGALT00000027647	1	-	176312090	176312189	176309202	176309298	176318114	176318316	8029	12	2	65	4	158	73	0.557515	1	0.735	0.882	-0.147
XLOC_001522		1	+	176339433	176339761	176338676	176338728	176343040	176343157	7368	9	0	54	2	359	45	0.775873	1	1	0.772	0.228
XLOC_001527	ENSGALT00000027655	1	+	176703125	176703363	176698843	176698963	176716259	176716381	196	3	32	4	44	297	73	1	1	0.023	0.022	0.001
XLOC_003151		1	-	176931808	176931928	176924492	176924565	176943671	176943759	2369	44	0	68	2	172	66	0.874053	1	1	0.929	0.071
XLOC_001530		1	+	177792538	177792632	177792258	177792446	177792753	177794651	3900	1	42	1	52	153	73	1	1	0.011	0.009	0.002
XLOC_001532	ENSGALT00000036444	1	+	177838792	177838911	177837590	177837680	177839324	177839402	1363	126	1	109	0	176	71	1	1	0.981	1	-0.019
XLOC_001532	ENSGALT00000036444	1	+	177838792	177838911	177837590	177837680	177841599	177846973	1364	38	0	82	1	178	73	1	1	1	0.971	0.029
XLOC_001532	ENSGALT00000036444	1	+	177839324	177839402	177837590	177837680	177841599	177848581	1366	106	0	38	1	142	73	1	1	1	0.951	0.049
XLOC_001532	ENSGALT00000036444	1	+	177849554	177849619	177848352	177848581	177850473	177850639	1369	4	0	48	3	116	73	1	1	1	0.91	0.09
XLOC_003156	ENSGALT00000027671	1	-	177865705	177865803	177865065	177865188	177866243	177866353	9517	2	162	4	451	157	73	1	1	0.006	0.004	0.002
XLOC_003156	ENSGALT00000027671	1	-	177865705	177865898	177865065	177865188	177866243	177866353	9519	14	162	8	451	252	73	1	1	0.024	0.005	0.019
XLOC_003160		1	-	178081155	178081306	178079879	178080048	178083223	178083332	6609	31	0	80	2	210	73	0.983461	1	1	0.933	0.067
XLOC_003160		1	-	178081190	178081306	178079932	178080048	178083223	178083332	6608	23	0	31	2	175	73	0.504563	1	1	0.866	0.134
XLOC_001536	ENSGALT00000027680	1	+	178142433	178142539	178133319	178133514	178151795	178151902	6348	49	1	60	0	165	73	1	1	0.956	1	-0.044
XLOC_003162	ENSGALT00000027684	1	-	178282647	178282799	178279133	178279248	178283726	178283895	4170	87	0	172	1	211	73	1	1	1	0.983	0.017
XLOC_003162	ENSGALT00000027684	1	-	178299146	178299319	178292916	178293082	178310938	178311089	4171	24	4	99	2	232	73	0.0649804	0.87863	0.654	0.94	-0.286
XLOC_003162	ENSGALT00000027684	1	-	178317383	178317499	178311666	178311783	178329990	178330203	4169	7	6	13	17	175	73	0.817653	1	0.327	0.242	0.085
XLOC_003162	ENSGALT00000027684	1	-	178318299	178318450	178317383	178317499	178329990	178330203	4168	20	0	32	1	210	73	0.932972	1	1	0.918	0.082
XLOC_001539	ENSGALT00000036438	1	+	178411035	178411232	178409265	178409361	178415200	178415285	6100	193	4	292	9	256	73	1	1	0.932	0.902	0.03
XLOC_001539	ENSGALT00000036438	1	+	178415200	178415285	178411035	178411232	178416773	178416882	6099	185	0	300	1	146	73	1	1	1	0.993	0.007
XLOC_003164		1	-	178505280	178505476	178504981	178505052	178506054	178506192	1683	131	1	174	0	246	64	1	1	0.971	1	-0.029
XLOC_003164		1	-	178528039	178528235	178526665	178526789	178529800	178529933	1684	119	0	188	1	255	73	1	1	1	0.982	0.018
XLOC_001543		1	+	178868880	178868944	178861542	178861607	178874501	178874597	1603	10	1	64	0	99	58	0.567141	1	0.854	1	-0.146
XLOC_001543		1	+	178868880	178868964	178861542	178861607	178874501	178874597	1604	117	1	380	0	131	58	1	1	0.981	1	-0.019
XLOC_001543		1	+	178875868	178876143	178874501	178874597	178878496	178878580	1602	608	0	1197	2	334	73	1	1	1	0.992	0.008
XLOC_003168		1	-	178921284	178922051	178911393	178911533	178940208	178940498	3246	237	1	113	0	826	73	1	1	0.954	1	-0.046
XLOC_003173		1	-	179593308	179593373	179592540	179592698	179593782	179593896	6821	43	1	137	0	116	73	1	1	0.964	1	-0.036
XLOC_001549	ENSGALT00000027727	1	+	179690768	179690925	179689338	179689498	179691720	179691773	7535	19	0	64	4	189	46	0.411369	1	1	0.796	0.204
XLOC_001549	ENSGALT00000027727	1	+	179690768	179690833	179689338	179689498	179691720	179691773	7536	13	0	32	4	89	46	0.33431	1	1	0.805	0.195
XLOC_003178		1	-	179772957	179772986	179771367	179771465	179773128	179773274	9075	1	0	49	2	44	73	1	1	1	0.976	0.024
XLOC_001559		1	+	181236241	181236283	181235418	181235599	181258825	181258885	11025	3	9	1	39	50	53	0.118239	1	0.261	0.026	0.235
XLOC_001560		1	+	181595068	181595160	181594806	181594877	181600102	181600211	1240	51	0	122	1	142	64	1	1	1	0.982	0.018
XLOC_001562	ENSGALT00000027766	1	+	181687460	181687620	181686608	181686905	181688451	181688555	3787	4566	4	2737	0	219	73	1	1	0.997	1	-0.003
XLOC_003186	ENSGALT00000036426	1	-	181835590	181835690	181834339	181834418	181835796	181837797	6884	85	2	146	1	158	72	1	1	0.951	0.985	-0.034
XLOC_003187		1	-	181892581	181892623	181884266	181884397	181894112	181894306	11311	66	62	28	34	70	73	0.864351	1	0.526	0.462	0.064
XLOC_003187		1	-	181892581	181892623	181884266	181884397	181894124	181894306	11312	65	152	30	101	70	73	0.665596	1	0.308	0.237	0.071
XLOC_003187		1	-	181907033	181907147	181894112	181894306	181915270	181915399	11310	278	16	314	21	173	73	1	1	0.88	0.863	0.017
XLOC_001569	ENSGALT00000036419	1	+	182047871	182048019	182045780	182046010	182048904	182049008	12394	10	3	18	7	207	73	0.962381	1	0.54	0.476	0.064
XLOC_001571		1	+	182297784	182297955	182261069	182261479	182319618	182320393	12340	0	3	1	6	230	73	1	1	0	0.05	-0.05
XLOC_003190		1	-	182498766	182498926	182496230	182496375	182503726	182503832	6181	56	0	59	1	219	73	1	1	1	0.952	0.048
XLOC_003190		1	-	182552361	182552433	182535683	182535785	182585495	182585557	6182	69	1	108	0	112	55	1	1	0.971	1	-0.029
XLOC_001578	ENSGALT00000030068	1	+	184175106	184175130	184174097	184174635	184175437	184175651	10222	0	6	2	12	34	73	0.495902	1	0	0.264	-0.264
XLOC_001582	ENSGALT00000027800	1	+	184441944	184442050	184422407	184422960	184457931	184458007	10164	23	0	35	2	161	69	0.575562	1	1	0.882	0.118
XLOC_003195		1	-	184493236	184493317	184492673	184492918	184493469	184493574	5248	21	0	103	10	146	73	0.242451	1	1	0.837	0.163
XLOC_001583	ENSGALT00000027807	1	+	184508641	184508722	184508393	184508441	184509386	184509519	11355	6	0	14	1	114	41	0.793271	1	1	0.834	0.166
XLOC_001583	ENSGALT00000027807	1	+	184508641	184508722	184508393	184508441	184509383	184509519	11356	2	4	8	2	114	41	0.13122	1	0.152	0.59	-0.438
XLOC_001583	ENSGALT00000027807	1	+	184509197	184509255	184508641	184508722	184509383	184509519	11357	0	2	2	4	102	73	0.540013	1	0	0.264	-0.264
XLOC_001584		1	+	184683482	184683719	184682906	184683089	184685271	184685419	4166	247	1	254	2	296	73	1	1	0.984	0.969	0.015
XLOC_001589		1	+	185010869	185011018	185010234	185010390	185011487	185011631	3921	55	0	183	2	208	73	1	1	1	0.97	0.03
XLOC_001589		1	+	185011487	185011631	185010869	185011018	185012632	185012786	3920	32	0	100	1	203	73	1	1	1	0.973	0.027
XLOC_001590		1	+	185032692	185032817	185031598	185031736	185037602	185037685	11609	6	0	27	1	184	73	1	1	1	0.915	0.085
XLOC_003205		1	-	185095525	185095632	185093499	185094011	185096593	185096818	8699	58	2	100	0	166	73	0.713893	1	0.927	1	-0.073
XLOC_001601		1	+	186977420	186977672	186971746	186971827	186979368	186979533	9282	259	9	59	3	311	73	1	1	0.871	0.822	0.049
XLOC_001601		1	+	186977420	186977649	186971746	186971827	186979368	186979533	9283	265	9	63	3	288	73	1	1	0.882	0.842	0.04
XLOC_001601		1	+	186996607	186996668	186979678	186979741	187017988	187018070	9284	24	3	8	0	91	56	0.517933	1	0.831	1	-0.169
XLOC_003212		1	-	187682362	187682787	187679408	187680551	187691122	187691184	3527	2	0	49	1	466	55	1	1	1	0.853	0.147
XLOC_003213	ENSGALT00000027871	1	-	187908395	187908523	187903778	187903871	187920961	187921142	4695	59	0	86	5	187	73	0.208891	1	1	0.87	0.13
XLOC_003220	ENSGALT00000030050	1	-	188722607	188722763	188694794	188694863	188739030	188739172	2017	1	0	0	4	204	62	0.230549	1	1	0	1
XLOC_003224	ENSGALT00000022794	1	-	189518954	189519399	189507967	189508116	189529668	189529781	7329	44	0	59	1	504	73	0.805817	1	1	0.895	0.105
XLOC_003225	ENSGALT00000025550	1	-	189565256	189565280	189563082	189563142	189566653	189566753	12315	18	11	18	75	17	53	0.000190659	0.0213729	0.836	0.428	0.408
XLOC_003225	ENSGALT00000025550	1	-	189572665	189572815	189568562	189568670	189577540	189577641	12314	36	48	17	69	209	73	0.0505625	0.803979	0.208	0.079	0.129
XLOC_001618	ENSGALT00000022764	1	+	189680459	189680551	189678827	189678909	189681439	189681573	8075	23	3	64	5	151	73	0.866037	1	0.788	0.861	-0.073
XLOC_003227	ENSGALT00000002817	1	-	189704773	189704882	189704294	189704532	189705176	189705290	3275	14	43	12	255	168	73	0.0681078	0.902332	0.124	0.02	0.104
XLOC_001621		1	+	191230961	191231103	191136976	191137095	191338264	191338362	7210	18	5	28	11	201	73	0.832447	1	0.567	0.48	0.087
XLOC_001621		1	+	191528848	191528947	191523403	191523656	191530933	191531169	7209	26	0	47	2	158	73	0.773229	1	1	0.916	0.084
XLOC_003230		1	-	192028982	192029116	192027892	192028586	192035064	192035219	3075	9	3	3	0	193	73	0.465864	1	0.532	1	-0.468
XLOC_003230		1	-	192029602	192029693	192028982	192029116	192035064	192035219	3076	5	2	3	0	150	73	0.448159	1	0.549	1	-0.451
XLOC_003230		1	-	192035064	192035219	192029602	192029693	192036661	192036828	3073	4	1	2	0	214	73	0.701522	1	0.577	1	-0.423
XLOC_003230		1	-	192035064	192035198	192029602	192029693	192036661	192036768	3074	6	1	2	0	193	73	0.791485	1	0.694	1	-0.306
XLOC_001625	ENSGALT00000030044	1	+	192057504	192057644	192056574	192056714	192058064	192058162	2341	24	0	46	1	199	73	1	1	1	0.944	0.056
XLOC_001625	ENSGALT00000030044	1	+	192057538	192057644	192056574	192056714	192058064	192058162	2340	12	0	24	1	165	73	0.943331	1	1	0.914	0.086
XLOC_003232	ENSGALT00000044923	1	-	192130872	192131036	192130718	192130783	192131873	192131968	534	1	0	4	7	208	58	0.428426	1	1	0.137	0.863
XLOC_001631	ENSGALT00000044375	1	+	192152611	192152715	192132244	192132458	192156869	192156962	10816	12	4	13	1	163	73	0.316212	1	0.573	0.853	-0.28
XLOC_001631	ENSGALT00000044375	1	+	192152623	192152715	192132252	192132458	192156869	192156962	10815	13	4	35	1	151	73	0.0683595	0.902332	0.611	0.944	-0.333
XLOC_001635		1	+	192792242	192792321	192781427	192781599	192796741	192800402	5777	56	5	47	3	144	73	1	1	0.85	0.888	-0.038
XLOC_003238	ENSGALT00000001212	1	-	192888713	192888868	192885565	192887494	192891709	192891868	13000	11	0	8	5	214	73	0.034601	0.653726	1	0.353	0.647
XLOC_003238	ENSGALT00000001212	1	-	192889915	192889975	192888129	192888868	192891709	192891865	12998	0	3	9	2	106	73	0.0300755	0.614857	0	0.756	-0.756
XLOC_003238	ENSGALT00000001212	1	-	192894062	192894236	192892944	192893143	192895701	192895838	13002	53	2	51	2	233	73	1	1	0.893	0.889	0.004
XLOC_003238	ENSGALT00000001212	1	-	192899578	192899728	192897910	192898084	192901852	192901904	13001	10	8	6	2	181	45	0.53294	1	0.237	0.427	-0.19
XLOC_003238	ENSGALT00000001212	1	-	192915482	192916040	192914135	192914311	192916624	192916699	12999	30	4	16	3	612	68	0.897314	1	0.455	0.372	0.083
XLOC_003241	ENSGALT00000036390	1	-	193308427	193308502	193304631	193304717	193309411	193309573	4571	32	0	47	1	136	73	1	1	1	0.962	0.038
XLOC_003241	ENSGALT00000036390	1	-	193323185	193323376	193312135	193312253	193325477	193325864	4572	6	0	2	7	250	73	0.00811569	0.289266	1	0.077	0.923
XLOC_001647	ENSGALT00000029931	1	+	193590644	193590749	193589381	193589544	193591331	193591569	10536	0	37	2	83	164	73	1	1	0	0.011	-0.011
XLOC_003273	ENSGALT00000028004	1	-	194347948	194348020	194343474	194343591	194349349	194349445	12990	1	27	3	27	130	73	1	1	0.02	0.059	-0.039
XLOC_003273	ENSGALT00000028004	1	-	194349349	194349445	194343474	194343591	194352673	194352796	12991	90	2	66	1	155	73	1	1	0.955	0.969	-0.014
XLOC_003276	ENSGALT00000027997	1	-	194569653	194569779	194565417	194565560	194578449	194578530	2561	67	2	40	0	185	73	0.891233	1	0.93	1	-0.07
XLOC_001673	ENSGALT00000027987	1	+	194809423	194809574	194808557	194808836	194811666	194811861	7649	19	5	43	0	210	73	0.00823556	0.291018	0.569	1	-0.431
XLOC_001673	ENSGALT00000027987	1	+	194809464	194809574	194808737	194808836	194811666	194811861	7648	9	5	10	0	169	73	0.0521547	0.807152	0.437	1	-0.563
XLOC_003288		1	-	195051333	195051373	195049485	195049618	195053478	195053581	663	31	0	65	1	66	73	1	1	1	0.986	0.014
XLOC_039659		10	-	364627	364765	362072	362244	366148	366559	5122	4	2	15	8	197	73	1	1	0.426	0.41	0.016
XLOC_039375		10	+	439137	439315	434018	434222	442671	442746	8761	10	0	47	2	232	68	0.810799	1	1	0.873	0.127
XLOC_039375		10	+	444741	444909	444021	444173	448534	448660	8762	0	8	1	10	227	73	1	1	0	0.031	-0.031
XLOC_039377	ENSGALT00000003886	10	+	503727	503877	501375	501485	508202	508322	6282	392	3	1026	6	209	73	1	1	0.979	0.984	-0.005
XLOC_039671	ENSGALT00000040332	10	-	606495	606658	599897	599967	609239	609388	6569	7	7	2	14	212	63	0.124621	1	0.229	0.041	0.188
XLOC_039677	ENSGALT00000003455	10	-	812603	812697	810709	810853	812828	812942	12530	42	0	278	3	153	73	1	1	1	0.978	0.022
XLOC_039677	ENSGALT00000003455	10	-	812828	812942	810709	810853	815960	816004	12534	3	0	51	1	137	37	1	1	1	0.932	0.068
XLOC_039677	ENSGALT00000003455	10	-	813496	813572	812828	812942	815960	816004	12532	69	0	434	1	102	37	1	1	1	0.994	0.006
XLOC_039686	ENSGALT00000003234	10	-	905207	905261	903091	903294	906249	906373	9243	0	5	1	3	94	73	0.526243	1	0	0.206	-0.206
XLOC_039686	ENSGALT00000003234	10	-	922149	922362	917115	917228	922874	922956	9245	33	1	21	2	272	73	0.582128	1	0.899	0.738	0.161
XLOC_039686	ENSGALT00000003234	10	-	943964	944105	940084	940160	948458	948654	9242	8	1	18	0	196	69	0.408201	1	0.738	1	-0.262
XLOC_039686	ENSGALT00000003234	10	-	943964	944084	940084	940160	948458	948654	9244	27	1	33	0	175	69	0.843782	1	0.914	1	-0.086
XLOC_039686	ENSGALT00000003234	10	-	1002040	1002097	998917	999015	1004638	1004738	9246	9	0	13	2	100	73	0.465626	1	1	0.826	0.174
XLOC_039394	ENSGALT00000034761	10	+	1496126	1496159	1495255	1495450	1499435	1499504	13138	7	2	1	15	41	62	0.000995275	0.0752159	0.841	0.092	0.749
XLOC_039693		10	-	1706380	1706475	1699161	1699295	1710563	1710735	6968	278	1	407	0	154	73	1	1	0.992	1	-0.008
XLOC_039693		10	-	1714576	1714924	1710563	1710735	1734302	1734399	6967	18	8	2	24	407	73	0.000247431	0.0248391	0.288	0.015	0.273
XLOC_039693		10	-	1723274	1724024	1710563	1710735	1734302	1734399	6969	25	8	24	24	809	73	0.174796	1	0.22	0.083	0.137
XLOC_039400	ENSGALT00000044585	10	+	1837463	1837811	1837187	1837325	1837897	1837993	654	263	1	284	0	407	73	1	1	0.979	1	-0.021
XLOC_039400	ENSGALT00000044585	10	+	1837654	1837811	1837187	1837325	1837897	1837993	653	364	1	340	0	216	73	1	1	0.992	1	-0.008
XLOC_039698	ENSGALT00000022849	10	-	1861266	1861366	1858973	1860637	1864998	1865167	9202	0	1	4	20	159	73	1	1	0	0.084	-0.084
XLOC_039698	ENSGALT00000022849	10	-	1882596	1882753	1882278	1882380	1883527	1883656	9203	8	2	73	1	216	73	0.0886668	1	0.575	0.961	-0.386
XLOC_039403		10	+	1897985	1898034	1897611	1897689	1898267	1899245	4369	0	3	7	4	82	71	0.0968092	1	0	0.602	-0.602
XLOC_039405	ENSGALT00000040038	10	+	1915853	1915894	1915700	1915779	1915974	1916022	6822	1	0	3	1	35	40	0.833223	1	1	0.774	0.226
XLOC_039703	ENSGALT00000002079	10	-	1978397	1978491	1978061	1978128	1980604	1980818	3523	20	0	75	5	140	60	0.440612	1	1	0.865	0.135
XLOC_039410		10	+	2048898	2048941	2048641	2048820	2049024	2049133	13101	4	37	3	48	72	73	1	1	0.099	0.06	0.039
XLOC_039411	ENSGALT00000002159	10	+	2059207	2059363	2058855	2058974	2059959	2060159	11805	1006	5	917	3	215	73	1	1	0.986	0.99	-0.004
XLOC_039710	ENSGALT00000002461	10	-	2143469	2143579	2142820	2142900	2143667	2143811	8167	14	1	40	0	169	73	0.546549	1	0.858	1	-0.142
XLOC_039717		10	-	2399224	2399416	2389993	2390138	2411256	2411423	3585	1	1	0	1	251	73	0.673997	1	0.225	0	0.225
XLOC_039717		10	-	2494996	2495163	2475720	2475813	2495781	2495861	3578	0	2	10	1	226	73	0.0409354	0.713294	0	0.764	-0.764
XLOC_039717		10	-	2495052	2495163	2475720	2475813	2495781	2495861	3581	1	2	22	1	170	73	0.0412678	0.717228	0.177	0.904	-0.727
XLOC_039717		10	-	2495052	2495163	2475720	2475813	2496068	2496106	3582	1	1	22	0	128	31	0.117513	1	0.195	1	-0.805
XLOC_039422	ENSGALT00000004346	10	+	2535612	2535735	2496199	2496422	2559118	2562378	1657	49	1	22	6	182	73	0.0199647	0.4813	0.952	0.595	0.357
XLOC_039422	ENSGALT00000004346	10	+	2535612	2535735	2496199	2496422	2550302	2550449	1658	32	0	22	1	182	73	0.742421	1	1	0.898	0.102
XLOC_039422	ENSGALT00000004346	10	+	2550302	2550449	2535612	2535735	2559118	2562378	1654	4	17	8	0	206	73	0.000339256	0.031258	0.077	1	-0.923
XLOC_039422	ENSGALT00000004346	10	+	2550302	2550449	2496199	2496422	2559118	2562378	1655	4	1	9	6	206	73	0.573784	1	0.586	0.347	0.239
XLOC_039422	ENSGALT00000004346	10	+	2569683	2569800	2559118	2562378	2571670	2572118	1653	84	147	29	41	176	73	1	1	0.192	0.227	-0.035
XLOC_039422	ENSGALT00000004346	10	+	2571670	2571867	2559118	2562378	2578442	2579191	1656	364	1	137	0	256	73	1	1	0.99	1	-0.01
XLOC_039426	ENSGALT00000004664	10	+	2987343	2987508	2986964	2987051	2987938	2989344	6588	2	7	0	9	224	73	0.738745	1	0.085	0	0.085
XLOC_039724	ENSGALT00000004776	10	-	3172680	3172750	3170721	3171508	3173851	3174073	4282	49	1	123	0	126	73	1	1	0.966	1	-0.034
XLOC_039429	ENSGALT00000034634	10	+	3229652	3229680	3229516	3229560	3231027	3231133	8809	5	0	17	3	21	37	0.750911	1	1	0.909	0.091
XLOC_039429	ENSGALT00000034634	10	+	3235250	3235343	3234459	3234553	3235884	3235963	8808	31	0	102	1	151	72	1	1	1	0.98	0.02
XLOC_039726	ENSGALT00000005141	10	-	3241346	3241527	3240339	3240444	3242949	3243187	6717	246	1	730	15	240	73	1	1	0.987	0.937	0.05
XLOC_039727		10	-	3283875	3284009	3283178	3283281	3284289	3284477	5458	74	0	151	3	193	73	1	1	1	0.95	0.05
XLOC_039431		10	+	3297446	3297481	3289485	3290494	3307256	3307368	11375	3	0	11	1	56	73	1	1	1	0.935	0.065
XLOC_039431		10	+	3325178	3325318	3321262	3324255	3326148	3326630	11376	0	2	2	0	199	73	0.135852	1	0	1	-1
XLOC_039432		10	+	3345926	3346092	3342426	3342580	3349238	3349396	5570	126	1	231	0	225	73	1	1	0.976	1	-0.024
XLOC_039432		10	+	3405500	3408213	3404573	3404619	3410451	3410541	5568	158	1	55	4	2738	39	0.03582	0.66554	0.692	0.164	0.528
XLOC_039728		10	-	3547541	3547612	3545255	3545402	3548121	3548494	5732	2	8	2	30	128	73	0.705866	1	0.125	0.037	0.088
XLOC_039729		10	-	3617275	3618156	3614963	3615834	3618285	3618310	4510	925	0	1229	1	885	18	1	1	1	0.962	0.038
XLOC_039729		10	-	3624678	3624739	3623724	3623802	3625375	3625436	4511	101	1	310	0	87	52	1	1	0.984	1	-0.016
XLOC_039733	ENSGALT00000006394	10	-	3675542	3675618	3674938	3675126	3676425	3676496	9008	591	8	986	3	129	64	1	1	0.973	0.994	-0.021
XLOC_039733	ENSGALT00000006394	10	-	3676102	3676178	3675063	3675126	3676425	3676496	9009	494	8	449	3	112	47	1	1	0.963	0.984	-0.021
XLOC_039734		10	-	3786366	3786533	3784074	3784258	3787783	3787926	1824	89	1	87	0	226	73	1	1	0.966	1	-0.034
XLOC_039734		10	-	3813237	3813372	3812529	3812658	3814676	3814790	1826	68	0	57	1	194	73	1	1	1	0.955	0.045
XLOC_039734		10	-	3852367	3852484	3847000	3847171	3859289	3859373	1825	11	0	9	4	176	73	0.073672	0.934673	1	0.483	0.517
XLOC_039445	ENSGALT00000006011	10	+	4880543	4880587	4879165	4879330	4881155	4881332	6164	0	114	1	181	74	73	1	1	0	0.005	-0.005
XLOC_039445	ENSGALT00000006011	10	+	4884936	4884972	4883314	4883413	4886310	4886390	6165	8	1	17	0	58	73	0.808045	1	0.91	1	-0.09
XLOC_039445	ENSGALT00000006011	10	+	4884936	4884972	4883314	4883413	4887403	4889771	6166	9	91	28	87	58	73	0.0294756	0.609823	0.111	0.288	-0.177
XLOC_039450		10	+	5258941	5259088	5258471	5258562	5260989	5261167	8882	9	27	23	57	206	73	1	1	0.106	0.125	-0.019
XLOC_039745	ENSGALT00000006194	10	-	5283168	5283320	5281766	5281907	5285520	5286957	8788	0	5	9	4	211	73	0.018058	0.449204	0	0.438	-0.438
XLOC_039452		10	+	5331224	5331302	5307056	5307159	5356026	5357033	6419	7	9	5	13	142	73	0.601698	1	0.286	0.165	0.121
XLOC_039452		10	+	5374048	5374084	5373000	5373146	5375662	5375749	6420	3	4	6	16	58	73	0.636237	1	0.486	0.321	0.165
XLOC_039746	ENSGALT00000006290	10	-	5400633	5400705	5398236	5399763	5403802	5404396	7545	9	1	7	0	130	73	0.681012	1	0.835	1	-0.165
XLOC_039747	ENSGALT00000034518	10	-	5539838	5540090	5538866	5539045	5540490	5540844	6314	120	65	109	99	311	73	0.233438	1	0.302	0.205	0.097
XLOC_039454		10	+	5775949	5776097	5770347	5770409	5783217	5783301	3939	19	1	38	6	189	55	0.460953	1	0.847	0.648	0.199
XLOC_039455		10	+	5850093	5850198	5833895	5833923	5853270	5853340	2709	52	0	37	1	102	11	0.520165	1	1	0.8	0.2
XLOC_039754	ENSGALT00000006632	10	-	6330007	6330100	6328949	6329045	6336025	6336152	11150	54	6	97	3	152	73	0.30371	1	0.812	0.939	-0.127
XLOC_039754	ENSGALT00000006632	10	-	6356373	6357269	6347027	6347154	6365118	6365195	11149	427	0	517	1	952	70	1	1	1	0.974	0.026
XLOC_039472	ENSGALT00000034458	10	+	6460852	6460956	6453994	6454153	6462345	6462495	78	602	2	475	1	163	73	1	1	0.993	0.995	-0.002
XLOC_039472	ENSGALT00000034458	10	+	6464664	6464780	6464313	6464497	6466600	6466764	79	10	97	8	62	175	73	1	1	0.041	0.051	-0.01
XLOC_039760	ENSGALT00000034424	10	-	6777261	6777375	6776251	6776404	6779666	6779759	3751	41	0	49	2	173	73	0.681399	1	1	0.912	0.088
XLOC_039760	ENSGALT00000034424	10	-	6798221	6798359	6789846	6789936	6801027	6801156	3750	3	4	1	1	197	73	1	1	0.217	0.27	-0.053
XLOC_039760	ENSGALT00000034424	10	-	6828749	6828920	6827195	6827357	6829461	6829614	3748	321	4	322	6	230	73	1	1	0.962	0.945	0.017
XLOC_039760	ENSGALT00000034424	10	-	6855614	6855709	6854543	6854637	6856307	6857906	3749	145	0	195	2	154	73	1	1	1	0.979	0.021
XLOC_039761	ENSGALT00000034417	10	-	6919945	6920017	6919009	6919216	6920926	6921000	2497	35	196	59	265	124	67	1	1	0.088	0.107	-0.019
XLOC_039761	ENSGALT00000034417	10	-	6919945	6920017	6919009	6919213	6920926	6921000	2498	5	26	15	19	124	67	0.0671562	0.894441	0.094	0.299	-0.205
XLOC_039474	ENSGALT00000023225	10	+	7098819	7098885	7094926	7095072	7099003	7099374	2581	3	13	15	31	118	73	0.588211	1	0.125	0.23	-0.105
XLOC_039474	ENSGALT00000023225	10	+	7122223	7122321	7119477	7119514	7133711	7137592	2582	26	13	51	6	114	30	0.0220973	0.510744	0.345	0.691	-0.346
XLOC_039474	ENSGALT00000023225	10	+	7122223	7122321	7119477	7119514	7133718	7137800	2583	0	1	25	0	114	30	0.0685532	0.902332	0	1	-1
XLOC_039762	ENSGALT00000039174	10	-	7171454	7171515	7171168	7171342	7172433	7172516	6141	1	2	4	4	108	73	0.801276	1	0.253	0.403	-0.15
XLOC_039762	ENSGALT00000039174	10	-	7177325	7177374	7176327	7176413	7180743	7180814	6140	1	0	13	1	75	64	1	1	1	0.917	0.083
XLOC_039484	ENSGALT00000007014	10	+	7445214	7445362	7444547	7444747	7446065	7446199	1438	8	0	19	1	207	73	0.841452	1	1	0.87	0.13
XLOC_039484	ENSGALT00000007014	10	+	7449562	7449716	7448761	7448871	7450337	7450443	1437	6	0	7	2	213	73	0.336284	1	1	0.545	0.455
XLOC_039484	ENSGALT00000007014	10	+	7449594	7449716	7448485	7448871	7450337	7450443	1439	1	0	4	2	181	73	0.692649	1	1	0.446	0.554
XLOC_039484	ENSGALT00000007014	10	+	7463775	7463871	7462563	7462771	7466718	7466973	1440	1	54	5	131	155	73	1	1	0.009	0.018	-0.009
XLOC_039764	ENSGALT00000007043	10	-	7474805	7474986	7470424	7474264	7475763	7477012	8666	28	0	66	1	240	73	1	1	1	0.953	0.047
XLOC_039764	ENSGALT00000007043	10	-	7480588	7480719	7479855	7479996	7480888	7480993	8665	11	0	26	3	190	73	0.403441	1	1	0.769	0.231
XLOC_039485		10	+	7492715	7492833	7484145	7484218	7504870	7505043	2670	66	1	102	2	170	66	1	1	0.962	0.952	0.01
XLOC_039488	ENSGALT00000007264	10	+	8213722	8213831	8212875	8212955	8214661	8214820	13437	38	0	122	2	168	73	1	1	1	0.964	0.036
XLOC_039490		10	+	8314657	8314666	8313321	8313549	8316752	8317434	12910	1	41	1	14	4	73	0.63737	1	0.308	0.566	-0.258
XLOC_039490		10	+	8317405	8317486	8316752	8316853	8319301	8319500	12907	20	14	9	14	146	73	0.313327	1	0.417	0.243	0.174
XLOC_039490		10	+	8321560	8321635	8319301	8319500	8323234	8323328	12909	6	6	9	19	136	73	0.522079	1	0.349	0.203	0.146
XLOC_039492		10	+	8379764	8379897	8378222	8378300	8383566	8383710	6311	45	10	84	1	190	71	0.00193204	0.113984	0.627	0.969	-0.342
XLOC_039773		10	-	8512020	8512158	8508342	8511376	8513318	8513463	4911	1	73	0	74	197	73	1	1	0.005	0	0.005
XLOC_039494		10	+	8585982	8586320	8581241	8581439	8590770	8591911	394	189	0	310	2	397	73	1	1	1	0.966	0.034
XLOC_039495	ENSGALT00000007624	10	+	8627310	8627599	8626420	8626544	8628702	8628776	12537	16	3	31	14	342	67	0.35516	1	0.511	0.303	0.208
XLOC_039777	ENSGALT00000039005	10	-	8720561	8720738	8719802	8719917	8721930	8722085	13449	151	0	3966	3	236	73	1	1	1	0.998	0.002
XLOC_039778	ENSGALT00000007674	10	-	8771925	8771988	8771444	8771531	8772815	8772933	9620	18	1	26	0	112	73	0.887597	1	0.921	1	-0.079
XLOC_039499	ENSGALT00000034335	10	+	9411612	9413660	9411202	9411264	9415753	9419568	11088	102	0	79	6	2089	55	0.0114994	0.346838	1	0.257	0.743
XLOC_039499	ENSGALT00000034335	10	+	9411612	9411669	9411172	9411264	9415753	9419492	11091	4	0	11	6	100	73	0.226029	1	1	0.572	0.428
XLOC_039499	ENSGALT00000034335	10	+	9411612	9411671	9411172	9411264	9415753	9419492	11093	2	0	9	6	104	73	0.390796	1	1	0.513	0.487
XLOC_039499	ENSGALT00000034335	10	+	9413492	9413527	9411612	9411669	9415753	9419543	11089	0	2	1	2	33	50	0.573633	1	0	0.431	-0.431
XLOC_039499	ENSGALT00000034335	10	+	9413492	9413660	9411612	9411669	9415753	9419492	11094	0	2	7	2	204	50	0.107323	1	0	0.462	-0.462
XLOC_039782	ENSGALT00000007847	10	-	9557324	9557396	9556239	9556442	9559760	9559859	8869	78	0	199	5	130	73	1	1	1	0.957	0.043
XLOC_039782	ENSGALT00000007847	10	-	9557324	9557396	9556239	9556442	9560116	9560185	8870	46	3	77	4	119	62	1	1	0.889	0.909	-0.02
XLOC_039782	ENSGALT00000007847	10	-	9559760	9559859	9556239	9556442	9560116	9560185	8867	54	3	186	4	147	62	0.815923	1	0.884	0.951	-0.067
XLOC_039782	ENSGALT00000007847	10	-	9559760	9559859	9557324	9557396	9560116	9560185	8868	90	4	304	1	139	54	0.345965	1	0.897	0.992	-0.095
XLOC_039782	ENSGALT00000007847	10	-	9560260	9560311	9560116	9560185	9560503	9560605	8871	42	7	74	22	77	62	0.549375	1	0.829	0.73	0.099
XLOC_039782	ENSGALT00000007847	10	-	9565208	9565261	9563944	9563952	9566459	9566686	8866	56	1	99	0	46	1	0.38646	1	0.549	1	-0.451
XLOC_039785	ENSGALT00000007955	10	-	9849513	9849693	9849015	9849097	9850874	9851040	1705	10	0	22	2	239	73	0.524812	1	1	0.771	0.229
XLOC_039512	ENSGALT00000000716	10	+	9966062	9966209	9963190	9963281	9978535	9978634	3360	32	0	49	2	206	73	0.631143	1	1	0.897	0.103
XLOC_039512	ENSGALT00000000716	10	+	10002085	10002258	9994842	9995044	10002354	10004800	3359	0	5	3	26	232	73	1	1	0	0.035	-0.035
XLOC_039789	ENSGALT00000009147	10	-	10189995	10190142	10186200	10186354	10194708	10195117	6627	88	0	76	1	206	73	1	1	1	0.964	0.036
XLOC_039518	ENSGALT00000009213	10	+	10211111	10211165	10210445	10210616	10212839	10213034	2372	16	2	34	0	94	73	0.343175	1	0.861	1	-0.139
XLOC_039520	ENSGALT00000009244	10	+	10238098	10238218	10235328	10235448	10239385	10239568	2717	216	0	598	1	179	73	1	1	1	0.996	0.004
XLOC_039520	ENSGALT00000009244	10	+	10251544	10251598	10251330	10251387	10252023	10252123	2715	11	6	29	46	71	50	0.132965	1	0.564	0.307	0.257
XLOC_039520	ENSGALT00000009244	10	+	10255692	10255726	10253413	10253574	10260196	10263085	2716	32	237	89	434	54	73	0.697937	1	0.154	0.217	-0.063
XLOC_039792		10	-	10336894	10336984	10336186	10336267	10338195	10338774	1503	16	5	28	15	149	73	0.594052	1	0.611	0.478	0.133
XLOC_039792		10	-	10345609	10345695	10342936	10343081	10346301	10346446	1502	154	0	301	1	146	73	1	1	1	0.993	0.007
XLOC_039525	ENSGALT00000009637	10	+	10542377	10542426	10539770	10539935	10542552	10542688	9947	89	2	97	0	84	73	1	1	0.975	1	-0.025
XLOC_039795	ENSGALT00000009693	10	-	10693654	10693782	10689549	10691650	10694586	10695975	5151	14	0	41	1	187	73	1	1	1	0.941	0.059
XLOC_039795	ENSGALT00000009693	10	-	10696822	10696969	10694586	10695975	10700193	10700281	5152	215	1	344	0	206	73	1	1	0.987	1	-0.013
XLOC_039530	ENSGALT00000009702	10	+	10720558	10720662	10719493	10719591	10721519	10721602	3780	48	0	120	2	163	73	1	1	1	0.964	0.036
XLOC_039798	ENSGALT00000009815	10	-	10959198	10959269	10953626	10956401	10959394	10959502	8926	12	12	13	78	128	73	0.00703849	0.267462	0.363	0.087	0.276
XLOC_039798	ENSGALT00000009815	10	-	10965237	10965363	10963821	10963992	10966280	10966437	8925	35	1	181	1	185	73	1	1	0.932	0.986	-0.054
XLOC_039532		10	+	11084777	11084904	11070481	11070718	11094358	11094433	6173	112	0	182	1	181	68	1	1	1	0.986	0.014
XLOC_039533	ENSGALT00000038669	10	+	11184870	11185022	11176597	11176697	11185691	11185870	7443	98	0	229	1	211	73	1	1	1	0.988	0.012
XLOC_039542		10	+	11719992	11720789	11719560	11719598	11721318	11721770	9951	114	0	75	1	814	31	0.462077	1	1	0.741	0.259
XLOC_039804		10	-	11835544	11835714	11834528	11834738	11836153	11836342	1298	70	1	22	0	229	73	1	1	0.957	1	-0.043
XLOC_039807	ENSGALT00000010400	10	-	11966203	11966248	11963353	11963567	11969120	11969579	4993	3	5	4	8	76	73	1	1	0.366	0.324	0.042
XLOC_039809	ENSGALT00000010512	10	-	12074414	12074461	12073882	12074332	12074935	12075049	11035	0	44	2	124	80	73	1	1	0	0.015	-0.015
XLOC_039809	ENSGALT00000010512	10	-	12081109	12081210	12074935	12075049	12083373	12083485	11036	168	2	468	0	160	73	1	1	0.975	1	-0.025
XLOC_039809	ENSGALT00000010512	10	-	12104985	12105080	12084696	12084866	12122694	12122886	11034	31	0	110	2	154	73	1	1	1	0.963	0.037
XLOC_039553	ENSGALT00000010834	10	+	12531883	12532023	12531619	12531775	12532796	12534611	7072	376	2	352	0	199	73	1	1	0.986	1	-0.014
XLOC_039558	ENSGALT00000010984	10	+	12838509	12839159	12816253	12816442	12863617	12863748	1416	32	4	57	5	709	73	0.851179	1	0.452	0.54	-0.088
XLOC_039559		10	+	13449632	13449764	13447601	13447641	13454699	13456526	2662	4	4	1	9	151	33	0.273999	1	0.179	0.024	0.155
XLOC_039832	ENSGALT00000045995	10	-	13502385	13502511	13498645	13498688	13507027	13508317	9834	1	2	1	6	148	36	0.949753	1	0.108	0.039	0.069
XLOC_039832	ENSGALT00000045995	10	-	13510612	13510675	13508133	13508317	13516729	13517100	9833	1	11	3	17	112	73	1	1	0.056	0.103	-0.047
XLOC_039832	ENSGALT00000045995	10	-	13513983	13514037	13510612	13510675	13516729	13517100	9835	3	1	11	0	77	56	0.33616	1	0.686	1	-0.314
XLOC_039832	ENSGALT00000045995	10	-	13612381	13612426	13596544	13596692	13625345	13625433	9836	4	0	18	2	76	73	0.864741	1	1	0.896	0.104
XLOC_039564		10	+	14006628	14006691	13994579	13995305	14008561	14008690	11812	3	0	10	3	112	73	0.507459	1	1	0.685	0.315
XLOC_039565	ENSGALT00000011260	10	+	14105024	14105081	14101044	14101124	14110568	14113752	10576	32	0	89	1	100	73	1	1	1	0.985	0.015
XLOC_039565	ENSGALT00000011260	10	+	14110568	14113752	14105024	14105081	14114088	14114222	10577	658	0	791	1	3220	50	0.946621	1	1	0.925	0.075
XLOC_039570	ENSGALT00000011310	10	+	14481518	14481627	14480619	14480679	14491040	14491183	7828	4	1	6	0	148	53	0.454876	1	0.589	1	-0.411
XLOC_039570	ENSGALT00000011310	10	+	14528793	14528913	14527977	14528052	14551074	14551197	7829	41	0	67	3	174	68	0.505769	1	1	0.897	0.103
XLOC_039854	ENSGALT00000038512	10	-	16144347	16144447	16138876	16138962	16147253	16147387	913	4	1	1	2	159	73	0.328636	1	0.647	0.187	0.46
XLOC_039855	ENSGALT00000011398	10	-	16208169	16208296	16207159	16207398	16210299	16210514	13166	291	1	149	0	186	73	1	1	0.991	1	-0.009
XLOC_039589	ENSGALT00000011431	10	+	16403199	16403428	16399890	16400606	16433347	16433554	9731	113	0	195	2	288	73	1	1	1	0.961	0.039
XLOC_039589	ENSGALT00000011431	10	+	16409872	16409910	16407334	16407375	16410656	16410794	9729	1	0	19	1	31	34	1	1	1	0.954	0.046
XLOC_039589	ENSGALT00000011431	10	+	16410470	16410566	16409872	16409910	16410656	16410794	9730	1	1	1	19	113	31	0.4866	1	0.215	0.014	0.201
XLOC_039589	ENSGALT00000011431	10	+	16440599	16440702	16433347	16433554	16443854	16444030	9728	15	2	81	0	162	73	0.133815	1	0.772	1	-0.228
XLOC_039589	ENSGALT00000011431	10	+	16443854	16444030	16433347	16433554	16445513	16445673	9727	21	1	63	2	235	73	1	1	0.867	0.907	-0.04
XLOC_039590		10	+	16547259	16547397	16546911	16547194	16550482	16550702	1583	58	35	20	33	197	73	0.031999	0.637781	0.38	0.183	0.197
XLOC_039858	ENSGALT00000011448	10	-	16654572	16654693	16645896	16646802	16663820	16663948	5896	8	1	6	0	180	73	0.635479	1	0.764	1	-0.236
XLOC_039858	ENSGALT00000011448	10	-	16746646	16746799	16739904	16740077	16753187	16753353	5897	18	29	14	31	212	73	1	1	0.176	0.135	0.041
XLOC_039858	ENSGALT00000011448	10	-	16753736	16753748	16753187	16753353	16762521	16762868	5895	2	9	1	14	10	73	0.52909	1	0.619	0.343	0.276
XLOC_039859	ENSGALT00000023574	10	-	16834009	16834150	16833159	16833679	16834285	16834400	4669	1	0	1	1	200	73	0.614167	1	1	0.267	0.733
XLOC_039859	ENSGALT00000023574	10	-	16834285	16834400	16833159	16833679	16836807	16836854	4670	0	2	1	1	141	40	0.550843	1	0	0.221	-0.221
XLOC_039862	ENSGALT00000011612	10	-	17117829	17117909	17116768	17116844	17118437	17118540	9514	57	0	200	9	142	69	0.417406	1	1	0.915	0.085
XLOC_039865	ENSGALT00000044545	10	-	17216504	17216645	17216131	17216240	17216746	17216892	4795	0	77	1	62	200	73	1	1	0	0.006	-0.006
XLOC_039865	ENSGALT00000044545	10	-	17222713	17222961	17221077	17221166	17223446	17223515	4797	4	44	6	62	296	62	1	1	0.019	0.02	-0.001
XLOC_039598	ENSGALT00000038419	10	+	17236814	17236856	17235137	17235297	17237325	17237502	4996	8	36	37	62	70	73	0.0819449	0.985977	0.188	0.384	-0.196
XLOC_039599	ENSGALT00000033800	10	+	17248392	17249190	17248046	17248134	17252306	17252462	6261	80	0	231	1	857	73	1	1	1	0.952	0.048
XLOC_039875		10	-	17557659	17557815	17556376	17556495	17559623	17559731	4756	28	0	70	1	215	73	1	1	1	0.96	0.04
XLOC_039876	ENSGALT00000012122	10	-	17620526	17620611	17615674	17616004	17628253	17628407	8466	13	5	19	23	146	73	0.12899	1	0.565	0.292	0.273
XLOC_039608	ENSGALT00000012541	10	+	18011738	18011821	18010830	18010933	18012031	18012188	13062	28	0	37	3	146	73	0.342142	1	1	0.86	0.14
XLOC_039608	ENSGALT00000012541	10	+	18011741	18011821	18010830	18010933	18012031	18012188	13061	35	0	56	3	146	73	0.536494	1	1	0.903	0.097
XLOC_039617		10	+	18613533	18613607	18611963	18612069	18618764	18619172	11732	19	0	11	2	134	73	0.218462	1	1	0.75	0.25
XLOC_039889	ENSGALT00000043922	10	-	18665250	18665365	18664140	18664268	18667320	18667430	11842	130	1	97	0	174	73	1	1	0.982	1	-0.018
XLOC_039889	ENSGALT00000043922	10	-	18665660	18665752	18665250	18665365	18667320	18667430	11841	310	1	146	0	151	73	1	1	0.993	1	-0.007
XLOC_039890	ENSGALT00000013068	10	-	18734758	18734845	18733098	18733196	18735063	18735262	13097	70	0	45	1	146	73	1	1	1	0.957	0.043
XLOC_039890	ENSGALT00000013068	10	-	18734758	18734857	18733098	18733196	18735063	18735262	13099	225	0	304	1	158	73	1	1	1	0.993	0.007
XLOC_039621		10	+	18750804	18750906	18750238	18750403	18751995	18752070	2305	1	1	17	3	156	68	0.441397	1	0.304	0.712	-0.408
XLOC_039623		10	+	18808190	18808306	18807741	18808116	18811221	18811467	4743	25	0	47	1	175	73	1	1	1	0.951	0.049
XLOC_039625	ENSGALT00000013141	10	+	18834474	18834516	18833419	18833590	18834933	18835046	7169	10	0	61	37	70	73	0.0164436	0.44012	1	0.632	0.368
XLOC_039625	ENSGALT00000013141	10	+	18840291	18840573	18839730	18839910	18843320	18843403	7167	20	0	87	2	341	73	0.872073	1	1	0.903	0.097
XLOC_039625	ENSGALT00000013141	10	+	18840291	18840573	18839730	18839910	18842474	18842705	7168	20	5	89	44	341	73	0.390722	1	0.461	0.302	0.159
XLOC_039625	ENSGALT00000013141	10	+	18842474	18842705	18839730	18839910	18843320	18843403	7165	27	0	227	2	290	73	1	1	1	0.966	0.034
XLOC_039625	ENSGALT00000013141	10	+	18842474	18842705	18840291	18840573	18843320	18843403	7166	22	0	187	2	290	73	1	1	1	0.959	0.041
XLOC_039893		10	-	19110590	19110623	19109999	19110098	19111442	19111550	9271	5	11	12	25	52	73	1	1	0.39	0.403	-0.013
XLOC_039894	ENSGALT00000045386	10	-	19156783	19156849	19156283	19156370	19158568	19158636	8024	0	84	1	339	106	61	1	1	0	0.002	-0.002
XLOC_039629	ENSGALT00000013266	10	+	19172035	19172207	19168175	19168528	19175617	19175814	5678	482	1	204	0	231	73	1	1	0.993	1	-0.007
XLOC_039629	ENSGALT00000013266	10	+	19185883	19186029	19185296	19185389	19187560	19187730	5677	116	0	88	1	205	73	1	1	1	0.969	0.031
XLOC_039895	ENSGALT00000013283	10	-	19222341	19222391	19220933	19221278	19223797	19223962	6772	12	0	50	1	86	73	1	1	1	0.977	0.023
XLOC_039630	ENSGALT00000038202	10	+	19231960	19232088	19231477	19231549	19232779	19232958	15	28	2	36	0	179	65	0.336669	1	0.836	1	-0.164
XLOC_039630	ENSGALT00000038202	10	+	19237624	19237691	19236726	19236888	19238192	19238358	13	29	0	39	2	120	73	0.789925	1	1	0.922	0.078
XLOC_039630	ENSGALT00000038202	10	+	19242566	19242674	19242045	19242246	19243746	19243909	16	32	0	66	1	167	73	1	1	1	0.966	0.034
XLOC_039630	ENSGALT00000038202	10	+	19247752	19247890	19246856	19247055	19248151	19248285	14	24	0	37	1	197	73	1	1	1	0.932	0.068
XLOC_039898	ENSGALT00000013365	10	-	19316144	19316312	19311106	19312023	19321217	19321391	9571	137	126	229	222	227	73	1	1	0.259	0.249	0.01
XLOC_039905	ENSGALT00000033574	10	-	19499892	19500005	19498504	19498612	19500366	19500438	5879	0	24	5	66	164	65	1	1	0	0.029	-0.029
XLOC_039906	ENSGALT00000036142	10	-	19520084	19520177	19519614	19519947	19520284	19520382	10781	169	0	368	1	152	73	1	1	1	0.994	0.006
XLOC_039907	ENSGALT00000013516	10	-	19538491	19538645	19538156	19538275	19538849	19538952	12329	111	6	130	0	213	73	0.0854853	1	0.864	1	-0.136
XLOC_039907	ENSGALT00000013516	10	-	19538491	19538645	19538156	19538275	19539493	19539574	12330	58	1	82	0	213	73	1	1	0.952	1	-0.048
XLOC_039907	ENSGALT00000013516	10	-	19538849	19538952	19538491	19538645	19539493	19539574	12324	55	0	55	2	162	73	0.840077	1	1	0.925	0.075
XLOC_039907	ENSGALT00000013516	10	-	19538849	19538952	19538156	19538275	19539244	19539279	12325	9	4	67	4	117	28	0.0393097	0.697407	0.35	0.8	-0.45
XLOC_039907	ENSGALT00000013516	10	-	19538849	19538952	19538156	19538275	19539493	19539574	12326	8	1	5	0	162	73	0.684419	1	0.783	1	-0.217
XLOC_039907	ENSGALT00000013516	10	-	19539244	19539279	19538849	19538952	19539493	19539574	12327	4	2	84	1	56	73	0.116499	1	0.723	0.991	-0.268
XLOC_039907	ENSGALT00000013516	10	-	19539244	19539279	19538156	19538275	19539493	19539574	12328	5	1	25	0	56	73	0.616317	1	0.867	1	-0.133
XLOC_039642	ENSGALT00000033572	10	+	19543895	19544026	19543260	19543379	19544972	19545129	9925	3	0	4	1	190	73	0.613322	1	1	0.606	0.394
XLOC_039642	ENSGALT00000033572	10	+	19546610	19546696	19544972	19545129	19546837	19547063	9926	0	2	2	1	146	73	0.272793	1	0	0.5	-0.5
XLOC_039644	ENSGALT00000020937	10	+	19559017	19559092	19558710	19558801	19559404	19559469	7353	57	0	87	4	121	58	0.510158	1	1	0.912	0.088
XLOC_039912	ENSGALT00000013580	10	-	19590370	19590490	19590169	19590292	19590580	19590967	1230	14	0	14	1	179	73	0.653425	1	1	0.851	0.149
XLOC_039649		10	+	19671479	19671602	19666804	19666889	19683386	19683524	3715	0	1	8	4	182	73	0.378485	1	0	0.445	-0.445
XLOC_039650	ENSGALT00000038024	10	+	19747344	19747476	19744093	19744118	19747545	19747697	9948	7	11	16	3	136	18	0.0216695	0.504495	0.078	0.414	-0.336
XLOC_044324		11	-	300864	300960	297193	297297	306614	306738	390	39	11	21	15	155	73	0.136614	1	0.625	0.397	0.228
XLOC_044324		11	-	314112	314703	310358	310484	318886	318940	387	443	0	454	1	624	47	1	1	1	0.972	0.028
XLOC_044324		11	-	314112	314685	310203	310484	318886	318940	389	469	0	486	1	606	47	1	1	1	0.974	0.026
XLOC_044324		11	-	317766	317912	314112	314685	318886	318940	385	9	30	8	34	179	47	1	1	0.073	0.058	0.015
XLOC_044324		11	-	317766	318940	314112	314685	319630	319850	386	147	9	119	8	1233	73	1	1	0.492	0.468	0.024
XLOC_044324		11	-	318886	318940	314112	314685	319630	319774	384	33	9	59	8	94	73	0.494477	1	0.74	0.851	-0.111
XLOC_044093		11	+	418419	418479	414318	414369	419754	419838	1461	15	0	43	1	77	44	1	1	1	0.961	0.039
XLOC_044093		11	+	420978	421089	419754	419838	421304	421406	1462	56	0	72	1	170	73	1	1	1	0.969	0.031
XLOC_044330	ENSGALT00000044152	11	-	447350	447434	447089	447103	447906	448012	9327	82	2	157	0	80	7	0.207263	1	0.782	1	-0.218
XLOC_044098		11	+	486397	486426	485984	486084	486604	487695	2998	0	9	1	3	44	73	0.346562	1	0	0.356	-0.356
XLOC_044099	ENSGALT00000040439	11	+	521602	521669	520633	520661	521836	522004	3755	505	78	172	25	68	21	1	1	0.667	0.68	-0.013
XLOC_044099	ENSGALT00000040439	11	+	521836	522004	520633	520661	522442	522665	3754	1248	1	388	0	175	21	1	1	0.993	1	-0.007
XLOC_044099	ENSGALT00000040439	11	+	522442	522665	521836	522004	523023	523184	3752	1162	0	374	1	282	73	1	1	1	0.99	0.01
XLOC_044099	ENSGALT00000040439	11	+	522459	522665	521836	522004	523023	523184	3753	2224	0	547	1	265	73	1	1	1	0.993	0.007
XLOC_044336	ENSGALT00000001768	11	-	560137	560212	558597	559427	563276	563445	1955	73	1	185	0	136	73	1	1	0.975	1	-0.025
XLOC_044337	ENSGALT00000001797	11	-	571371	571507	570886	571029	572012	572184	3222	26	0	84	2	195	73	1	1	1	0.94	0.06
XLOC_044106	ENSGALT00000001852	11	+	617516	617540	617097	617203	617711	618784	8970	0	17	4	22	34	73	0.148695	1	0	0.281	-0.281
XLOC_044109	ENSGALT00000043709	11	+	753297	753449	753094	753191	753820	756309	6725	4	19	5	16	211	73	1	1	0.068	0.098	-0.03
XLOC_044114	ENSGALT00000002429	11	+	901586	901743	898460	898559	905923	907196	4078	1	36	1	126	216	73	1	1	0.009	0.003	0.006
XLOC_044346	ENSGALT00000002737	11	-	1019661	1019759	1014708	1014841	1023112	1023256	12913	1	2	4	0	157	73	0.133986	1	0.189	1	-0.811
XLOC_044120	ENSGALT00000002797	11	+	1086475	1086616	1086172	1086302	1087217	1088030	9385	1	3	0	4	200	73	0.758015	1	0.108	0	0.108
XLOC_044120	ENSGALT00000002797	11	+	1091391	1091456	1091120	1091211	1092191	1097481	9384	2	13	3	22	116	73	1	1	0.088	0.079	0.009
XLOC_044125	ENSGALT00000003262	11	+	1197683	1197810	1197292	1197343	1198416	1198518	13221	2	3	8	0	157	44	0.0379943	0.68655	0.157	1	-0.843
XLOC_044354	ENSGALT00000042441	11	-	1239730	1239814	1237673	1238759	1240341	1240538	3028	7	2	18	3	146	73	0.808901	1	0.636	0.75	-0.114
XLOC_044354	ENSGALT00000042441	11	-	1302715	1302913	1293588	1295915	1313789	1314455	3027	42	0	99	2	257	73	0.979061	1	1	0.934	0.066
XLOC_044356	ENSGALT00000003500	11	-	1386732	1386798	1382852	1383024	1388564	1388694	5438	1	32	7	82	118	73	1	1	0.019	0.05	-0.031
XLOC_044358		11	-	1410474	1410592	1409905	1410007	1410866	1411030	1509	131	1	211	0	177	73	1	1	0.982	1	-0.018
XLOC_044358		11	-	1437529	1437652	1437138	1437290	1438487	1438607	1510	130	0	222	1	182	73	1	1	1	0.989	0.011
XLOC_044366	ENSGALT00000040057	11	-	1716384	1716528	1715621	1715726	1716974	1717073	10014	79	0	337	1	203	73	1	1	1	0.992	0.008
XLOC_044366	ENSGALT00000040057	11	-	1725535	1725658	1723922	1724077	1726571	1726715	10013	77	0	193	1	182	73	1	1	1	0.987	0.013
XLOC_044366	ENSGALT00000040057	11	-	1732144	1732176	1728382	1728534	1733815	1733888	10015	6	69	10	71	43	66	0.902501	1	0.118	0.178	-0.06
XLOC_044136	ENSGALT00000004100	11	+	1749626	1749760	1748054	1748113	1750198	1750317	4469	85	0	161	1	172	52	1	1	1	0.98	0.02
XLOC_044369	ENSGALT00000004174	11	-	1759376	1759476	1758621	1758845	1759633	1759821	7722	10	0	17	1	159	73	0.819923	1	1	0.886	0.114
XLOC_044370		11	-	1786658	1786764	1785688	1785838	1787114	1787232	110	0	9	2	38	165	73	1	1	0	0.023	-0.023
XLOC_044375		11	-	1921897	1921977	1919648	1919781	1923890	1924047	6275	14	0	29	1	146	73	1	1	1	0.935	0.065
XLOC_044141	ENSGALT00000004875	11	+	2151022	2151086	2149593	2149794	2151747	2151837	12896	48	0	188	3	114	73	1	1	1	0.976	0.024
XLOC_044144		11	+	2362491	2362587	2357762	2357879	2375641	2377802	12774	214	0	290	1	155	73	1	1	1	0.993	0.007
XLOC_044144		11	+	2362491	2362618	2357762	2357879	2375641	2377854	12775	249	0	294	1	186	73	1	1	1	0.991	0.009
XLOC_044151		11	+	2639516	2639951	2639222	2639325	2642227	2642277	9632	120	0	55	3	464	43	0.0519859	0.807152	1	0.629	0.371
XLOC_044151		11	+	2639516	2639672	2639171	2639325	2639805	2639951	9635	78	42	32	15	215	73	1	1	0.387	0.42	-0.033
XLOC_044151		11	+	2639805	2639951	2639171	2639325	2642227	2642277	9633	77	0	36	3	175	43	0.0770814	0.957931	1	0.747	0.253
XLOC_044151		11	+	2639805	2639938	2639171	2639325	2642227	2642277	9634	49	0	25	3	162	43	0.0723214	0.925378	1	0.689	0.311
XLOC_044395		11	-	2805592	2805694	2795662	2799232	2814059	2814146	9694	109	22	47	17	161	73	0.330473	1	0.692	0.556	0.136
XLOC_044395		11	-	2805592	2805690	2795864	2799232	2814059	2815106	9696	57	22	20	17	157	73	0.165105	1	0.546	0.354	0.192
XLOC_044395		11	-	2835144	2835247	2833337	2833500	2840244	2842580	9693	0	52	2	52	162	73	1	1	0	0.017	-0.017
XLOC_044157	ENSGALT00000005597	11	+	2943081	2943349	2937445	2937738	2944060	2944187	2229	67	12	47	13	327	73	0.611939	1	0.555	0.447	0.108
XLOC_044157	ENSGALT00000005597	11	+	2947366	2947454	2946698	2946875	2948112	2948188	2234	65	0	50	1	143	69	1	1	1	0.96	0.04
XLOC_044157	ENSGALT00000005597	11	+	2989704	2989919	2987662	2987904	2990562	2990727	2230	421	2	604	0	274	73	1	1	0.982	1	-0.018
XLOC_044164		11	+	4364672	4364816	4363784	4363884	4370196	4370302	4938	4	0	9	3	203	73	0.378995	1	1	0.519	0.481
XLOC_044406	ENSGALT00000039692	11	-	4485186	4485316	4484189	4484350	4487341	4487406	6990	5	0	30	1	174	58	1	1	1	0.909	0.091
XLOC_044407		11	-	4568655	4568744	4562543	4564147	4570320	4570403	8274	16	2	51	2	148	73	0.576146	1	0.798	0.926	-0.128
XLOC_044415	ENSGALT00000034245	11	-	6137098	6137397	6135569	6136846	6137714	6137788	2339	25	0	59	2	352	67	0.601978	1	1	0.849	0.151
XLOC_044177		11	+	6234529	6234610	6230880	6231081	6288072	6291296	6639	3	24	10	19	146	73	0.177119	1	0.059	0.208	-0.149
XLOC_044484	ENSGALT00000034194	11	-	7218498	7218539	7218111	7218172	7218974	7219185	8732	0	1	15	3	49	54	0.239977	1	0	0.846	-0.846
XLOC_044187	ENSGALT00000006871	11	+	7290108	7290156	7289437	7289642	7292454	7293020	11	1	3	1	7	82	73	0.836449	1	0.229	0.113	0.116
XLOC_044187	ENSGALT00000006871	11	+	7301354	7301507	7300219	7300348	7302831	7302964	12	29	1	57	0	212	73	0.785117	1	0.909	1	-0.091
XLOC_044188	ENSGALT00000006976	11	+	7323926	7324074	7323775	7323859	7324323	7324433	3018	3	11	1	52	207	73	0.626137	1	0.088	0.007	0.081
XLOC_044191		11	+	7856200	7856340	7855275	7855306	7859141	7862178	5974	14	2	22	1	150	24	0.522467	1	0.528	0.779	-0.251
XLOC_044494		11	-	7886174	7886218	7884489	7884666	7888475	7888600	7695	1	13	13	13	74	73	0.0134297	0.387673	0.071	0.497	-0.426
XLOC_044494		11	-	7886174	7886218	7884489	7884666	7888415	7888459	7696	1	0	11	1	38	37	1	1	1	0.915	0.085
XLOC_044495	ENSGALT00000007149	11	-	7923336	7923517	7917964	7918115	7931545	7931628	6479	1	0	14	24	240	73	0.412499	1	1	0.151	0.849
XLOC_044499		11	-	8902055	8902553	8901511	8901610	8905200	8905482	11463	2	0	4	1	557	73	0.690064	1	1	0.344	0.656
XLOC_044219	ENSGALT00000007898	11	+	10367280	10367349	10366804	10366981	10367872	10368052	10385	35	93	36	73	124	73	1	1	0.181	0.225	-0.044
XLOC_044219	ENSGALT00000007898	11	+	10367285	10367349	10366321	10366981	10367872	10368052	10387	33	93	36	73	114	73	0.928729	1	0.185	0.24	-0.055
XLOC_044219	ENSGALT00000007898	11	+	10367286	10367349	10366804	10366981	10367872	10368052	10386	43	93	51	73	112	73	0.54783	1	0.232	0.313	-0.081
XLOC_044516		11	-	10414709	10414824	10403110	10404435	10420119	10420236	10719	25	8	22	45	174	73	0.000527004	0.0448687	0.567	0.17	0.397
XLOC_044222		11	+	10469650	10469726	10468963	10469092	10469809	10469876	3125	199	1	386	0	125	60	1	1	0.99	1	-0.01
XLOC_044519	ENSGALT00000029547	11	-	10609618	10609715	10608906	10609013	10610306	10610462	9432	118	0	191	1	156	73	1	1	1	0.989	0.011
XLOC_044520	ENSGALT00000008207	11	-	10634724	10634775	10634140	10634281	10634902	10635007	211	8	0	25	10	88	73	0.10821	1	1	0.675	0.325
XLOC_044520	ENSGALT00000008207	11	-	10645897	10646045	10645123	10645273	10646885	10646966	210	12	0	20	1	207	73	0.789268	1	1	0.876	0.124
XLOC_044520	ENSGALT00000008207	11	-	10645897	10645990	10645123	10645273	10646885	10646966	212	3	0	8	1	152	73	0.796371	1	1	0.793	0.207
XLOC_044227	ENSGALT00000008370	11	+	10787616	10787704	10786609	10786695	10787823	10787927	12743	0	17	3	52	147	73	1	1	0	0.028	-0.028
XLOC_044228	ENSGALT00000008376	11	+	10803166	10803289	10802799	10803052	10803796	10803952	10549	2	0	0	1	182	73	0.268322	1	1	0	1
XLOC_044231	ENSGALT00000008447	11	+	10912268	10912402	10910802	10910876	10912959	10913048	11738	2	8	5	11	187	67	0.974237	1	0.082	0.14	-0.058
XLOC_044231	ENSGALT00000008447	11	+	10913353	10913433	10912959	10913048	10913939	10914020	11737	37	5	35	0	146	73	0.0824311	0.987877	0.787	1	-0.213
XLOC_044232	ENSGALT00000008465	11	+	11583053	11583207	11577540	11577671	11622056	11622187	9413	243	9	335	4	213	73	0.714697	1	0.902	0.966	-0.064
XLOC_044232	ENSGALT00000008465	11	+	11614973	11615071	11582883	11583207	11641277	11641671	9410	18	69	26	61	157	73	0.874615	1	0.108	0.165	-0.057
XLOC_044232	ENSGALT00000008465	11	+	11614973	11615071	11582883	11583207	11622056	11622187	9411	27	106	38	164	157	73	1	1	0.106	0.097	0.009
XLOC_044232	ENSGALT00000008465	11	+	11614973	11615071	11577547	11577671	11622056	11622187	9412	21	9	21	4	157	73	0.39056	1	0.52	0.709	-0.189
XLOC_044232	ENSGALT00000008465	11	+	11622056	11622187	11583053	11583207	11641277	11641671	9408	708	69	434	61	190	73	0.650108	1	0.798	0.732	0.066
XLOC_044232	ENSGALT00000008465	11	+	11622056	11622187	11614973	11615071	11641277	11641671	9409	611	0	284	2	190	73	1	1	1	0.982	0.018
XLOC_044232	ENSGALT00000008465	11	+	11647525	11647713	11644496	11644664	11649165	11649419	9414	2124	2	1257	0	247	73	1	1	0.997	1	-0.003
XLOC_044536	ENSGALT00000042668	11	-	14829045	14829081	14827171	14827243	14829632	14829762	12169	0	26	2	35	50	65	0.9153	1	0	0.069	-0.069
XLOC_044536	ENSGALT00000042668	11	-	14833430	14833516	14829632	14829762	14833607	14833751	12170	1	0	11	10	146	73	0.535096	1	1	0.355	0.645
XLOC_044248	ENSGALT00000008685	11	+	14928485	14928662	14928214	14928362	14929554	14929812	2821	6	0	12	1	236	73	0.729127	1	1	0.788	0.212
XLOC_044248	ENSGALT00000008685	11	+	14928485	14928706	14928214	14928362	14929554	14929812	2822	17	0	23	1	280	73	0.714188	1	1	0.857	0.143
XLOC_044541		11	-	15268758	15268849	15267680	15267778	15270384	15270497	6553	439	0	1158	2	150	73	1	1	1	0.996	0.004
XLOC_044255	ENSGALT00000008808	11	+	15844516	15844732	15843385	15843619	15857872	15863295	12429	506	1	428	0	275	73	1	1	0.993	1	-0.007
XLOC_044548	ENSGALT00000008821	11	-	16019566	16019706	16018270	16018427	16020067	16020180	4347	1	15	3	16	199	73	1	1	0.024	0.064	-0.04
XLOC_044257	ENSGALT00000008832	11	+	16200395	16200470	16200120	16200162	16201409	16203598	1539	199	2	61	0	98	35	1	1	0.973	1	-0.027
XLOC_044259	ENSGALT00000033740	11	+	16302237	16302330	16301761	16301901	16302448	16302833	546	2	7	3	8	152	73	1	1	0.121	0.153	-0.032
XLOC_044560		11	-	17060134	17060182	17059625	17060012	17060527	17060639	5722	25	1	43	0	82	73	1	1	0.957	1	-0.043
XLOC_044567	ENSGALT00000012758	11	-	17402761	17402903	17400961	17401098	17404071	17404170	6945	2	4	8	27	201	73	0.982046	1	0.154	0.097	0.057
XLOC_044568	ENSGALT00000033691	11	-	17428561	17428665	17427931	17428028	17437337	17437382	9185	6	0	89	1	128	38	1	1	1	0.964	0.036
XLOC_044272	ENSGALT00000009439	11	+	17497676	17497748	17497041	17497186	17498022	17498117	712	0	35	9	57	130	73	0.411626	1	0	0.081	-0.081
XLOC_044272	ENSGALT00000009439	11	+	17541591	17541759	17524938	17525178	17550545	17550676	713	37	5	52	0	227	73	0.0297431	0.61178	0.704	1	-0.296
XLOC_044272	ENSGALT00000009439	11	+	17554116	17554179	17550545	17550676	17555985	17556030	711	3	4	13	0	77	38	0.00929246	0.308659	0.27	1	-0.73
XLOC_044276		11	+	17857766	17858020	17856810	17856895	17859113	17859262	5660	0	9	1	23	313	73	1	1	0	0.01	-0.01
XLOC_044571	ENSGALT00000043860	11	-	17894109	17894191	17893778	17893960	17894270	17894354	8008	88	1	73	0	146	73	1	1	0.978	1	-0.022
XLOC_044571	ENSGALT00000043860	11	-	17894759	17894829	17894449	17894524	17895345	17895490	8007	94	0	109	11	121	68	0.0173098	0.446955	1	0.848	0.152
XLOC_044575	ENSGALT00000044339	11	-	17937982	17938116	17937784	17937863	17938928	17939032	13055	23	1	98	0	192	72	0.815735	1	0.896	1	-0.104
XLOC_044576	ENSGALT00000010149	11	-	17979710	17979854	17977970	17978037	17982643	17982746	809	60	1	96	0	190	60	1	1	0.95	1	-0.05
XLOC_044281		11	+	18061100	18061356	18056005	18056118	18064161	18064288	9524	3	5	6	6	315	73	0.930273	1	0.122	0.188	-0.066
XLOC_044281		11	+	18061103	18061356	18056005	18056118	18064161	18064288	9523	1	5	3	6	312	73	0.972317	1	0.045	0.105	-0.06
XLOC_044281		11	+	18064992	18065077	18064161	18064288	18074866	18075001	9522	1	9	2	11	146	73	1	1	0.053	0.083	-0.03
XLOC_044579	ENSGALT00000010046	11	-	18089897	18090040	18089307	18089455	18091047	18091251	11503	74	1	38	0	202	73	1	1	0.964	1	-0.036
XLOC_044292	ENSGALT00000000179	11	+	18279479	18279573	18278201	18278301	18280622	18280715	9749	31	0	39	1	153	73	1	1	1	0.949	0.051
XLOC_044306	ENSGALT00000000991	11	+	18443835	18443897	18431793	18431919	18444361	18444920	12697	19	18	3	13	110	73	0.0668239	0.891781	0.412	0.133	0.279
XLOC_044306	ENSGALT00000000991	11	+	18507774	18507864	18503829	18504043	18509453	18509724	12696	3	0	26	3	149	73	0.788045	1	1	0.809	0.191
XLOC_044604	ENSGALT00000001181	11	-	19171940	19172121	19171564	19171652	19172772	19172872	11347	51	1	256	0	240	73	1	1	0.939	1	-0.061
XLOC_044312		11	+	19177662	19177753	19175519	19175611	19179428	19180283	10328	20	0	31	1	150	73	1	1	1	0.938	0.062
XLOC_044312		11	+	19177662	19177856	19175519	19175611	19181693	19181819	10329	27	1	28	4	253	73	0.366088	1	0.886	0.669	0.217
XLOC_044312		11	+	19177662	19177793	19175519	19175611	19179428	19180281	10330	24	0	27	1	190	73	0.862108	1	1	0.912	0.088
XLOC_044313		11	+	19219616	19219625	19218380	19218457	19220832	19220928	11518	1	0	0	2	2	70	0.468638	1	1	0	1
XLOC_044313		11	+	19222553	19222609	19221731	19221830	19223676	19223790	11521	80	1	244	0	98	73	1	1	0.983	1	-0.017
XLOC_044313		11	+	19229415	19229543	19228828	19228918	19230150	19230255	11520	140	0	253	1	187	73	1	1	1	0.99	0.01
XLOC_048286	ENSGALT00000002196	12	+	141567	141708	124767	124866	155349	155627	6659	27	0	93	13	200	73	0.0614339	0.864444	1	0.723	0.277
XLOC_048294	ENSGALT00000002271	12	+	565289	565406	564370	564484	569451	569573	3009	27	2	21	3	176	73	0.759206	1	0.848	0.744	0.104
XLOC_048294	ENSGALT00000002271	12	+	565289	565398	564370	564484	569451	569573	3010	37	2	27	3	168	73	0.76609	1	0.889	0.796	0.093
XLOC_048294	ENSGALT00000002271	12	+	575668	575822	572648	572823	576395	576524	3011	27	0	21	1	213	73	0.677013	1	1	0.878	0.122
XLOC_048295	ENSGALT00000002333	12	+	616614	616628	616183	616231	616837	616954	10454	7	1	3	0	7	41	1	1	0.976	1	-0.024
XLOC_048532	ENSGALT00000043944	12	-	674637	674784	672280	672351	682817	683019	5018	19	4	12	3	197	64	1	1	0.607	0.565	0.042
XLOC_048532	ENSGALT00000043944	12	-	678591	678750	674637	674784	682817	683019	5016	1	9	0	8	218	73	1	1	0.036	0	0.036
XLOC_048532	ENSGALT00000043944	12	-	716139	716238	714031	714123	719067	719153	5017	2	8	2	20	158	73	0.956711	1	0.104	0.044	0.06
XLOC_048534	ENSGALT00000002560	12	-	760257	760455	759361	759469	761494	761761	7531	41	0	57	1	257	73	1	1	1	0.942	0.058
XLOC_048540	ENSGALT00000003010	12	-	1205331	1205543	1205081	1205160	1205910	1206045	1	1	16	10	23	270	72	0.376766	1	0.016	0.104	-0.088
XLOC_048541	ENSGALT00000003276	12	-	1359438	1359598	1353329	1356054	1362065	1362130	12133	3	7	12	35	204	58	1	1	0.109	0.089	0.02
XLOC_048541	ENSGALT00000003276	12	-	1362065	1362130	1353320	1356054	1365329	1365392	12132	11	0	59	3	99	56	0.890041	1	1	0.918	0.082
XLOC_048541	ENSGALT00000003276	12	-	1373623	1373845	1372580	1372647	1374872	1374985	12131	3	9	2	35	268	60	0.941018	1	0.069	0.013	0.056
XLOC_048554		12	-	1733427	1733486	1729180	1732176	1734930	1735060	8943	3	0	0	3	104	73	0.0442388	0.743528	1	0	1
XLOC_048311		12	+	1872239	1872366	1871308	1871388	1873884	1873960	3362	27	0	72	1	182	69	1	1	1	0.965	0.035
XLOC_048311		12	+	1876215	1876301	1874128	1874253	1879077	1879158	3363	11	0	42	2	146	73	0.894002	1	1	0.913	0.087
XLOC_048311		12	+	1879077	1879158	1874128	1874253	1880646	1882398	3365	34	0	27	1	146	73	0.972409	1	1	0.931	0.069
XLOC_048314		12	+	2150051	2151036	2148635	2148806	2152551	2152744	6980	3	2	1	0	1044	73	0.668469	1	0.095	1	-0.905
XLOC_048316	ENSGALT00000003723	12	+	2210533	2210602	2209955	2210064	2211666	2211794	9520	8	82	14	169	124	73	1	1	0.054	0.047	0.007
XLOC_048562	ENSGALT00000003959	12	-	2395930	2396048	2394245	2394588	2415888	2415988	8793	2	6	1	2	177	73	1	1	0.121	0.171	-0.05
XLOC_048562	ENSGALT00000003959	12	-	2395930	2396045	2394245	2394588	2415888	2415988	8795	2	6	1	2	174	73	1	1	0.123	0.173	-0.05
XLOC_048323	ENSGALT00000036282	12	+	2642452	2642542	2641590	2641680	2643141	2643405	9999	68	1	86	0	149	73	1	1	0.971	1	-0.029
XLOC_048323	ENSGALT00000036282	12	+	2645906	2646018	2644629	2644727	2647627	2648508	10000	31	0	71	1	171	73	1	1	1	0.968	0.032
XLOC_048577		12	-	2762272	2762401	2761954	2762070	2762910	2763027	13249	4	0	14	1	188	73	0.87912	1	1	0.845	0.155
XLOC_048578	ENSGALT00000006026	12	-	2811202	2811336	2808369	2808561	2816070	2816165	8834	4	14	4	23	193	73	1	1	0.098	0.062	0.036
XLOC_048330		12	+	2939516	2939672	2938362	2938569	2939762	2940040	3719	563	2	587	1	215	73	1	1	0.99	0.995	-0.005
XLOC_048332		12	+	2995578	2995768	2994564	2994676	2996775	2997163	7171	12	0	29	2	249	73	0.571077	1	1	0.81	0.19
XLOC_048589	ENSGALT00000007127	12	-	3123698	3123761	3122352	3122472	3123965	3124294	11488	1	1	10	0	112	73	0.197768	1	0.395	1	-0.605
XLOC_048335	ENSGALT00000007370	12	+	3149116	3149190	3148572	3148642	3151522	3151606	5712	16	3	118	6	124	63	0.304342	1	0.73	0.909	-0.179
XLOC_048335	ENSGALT00000007370	12	+	3152761	3152827	3152572	3152633	3153245	3153406	5714	43	0	227	1	99	54	1	1	1	0.992	0.008
XLOC_048336	ENSGALT00000035766	12	+	3179417	3179507	3178423	3178543	3181614	3181708	8155	8	8	3	10	149	73	0.287815	1	0.329	0.128	0.201
XLOC_048342		12	+	3325064	3325183	3324903	3324976	3326019	3326299	6888	2	10	3	7	171	66	0.882867	1	0.072	0.142	-0.07
XLOC_048343		12	+	3352921	3352997	3351919	3352192	3356079	3356393	12936	69	0	84	7	138	73	0.0893892	1	1	0.864	0.136
XLOC_048348	ENSGALT00000007684	12	+	3504494	3504585	3502409	3502447	3506552	3506672	392	33	1	87	6	108	31	0.73466	1	0.905	0.806	0.099
XLOC_048350	ENSGALT00000007715	12	+	3990455	3990627	3983950	3984133	4000651	4003447	11339	127	3	36	4	231	73	0.188435	1	0.93	0.74	0.19
XLOC_048350	ENSGALT00000007715	12	+	3990455	3990625	3983950	3984133	4000651	4003351	11341	121	3	36	4	229	73	0.205322	1	0.928	0.742	0.186
XLOC_048350	ENSGALT00000007715	12	+	3990455	3990564	3983950	3984133	4000651	4003456	11343	99	3	30	4	168	73	0.234282	1	0.935	0.765	0.17
XLOC_048350	ENSGALT00000007715	12	+	3990455	3990542	3983950	3984133	4000651	4003454	11344	78	3	23	4	146	73	0.210796	1	0.929	0.742	0.187
XLOC_048350	ENSGALT00000007715	12	+	3996324	3996380	3990455	3990627	4000651	4003447	11342	9	6	8	0	98	73	0.0552803	0.828096	0.528	1	-0.472
XLOC_048355		12	+	4391992	4392224	4389423	4389514	4392462	4392607	7590	4	19	13	28	291	73	0.955329	1	0.05	0.104	-0.054
XLOC_048355		12	+	4391992	4392238	4389423	4389514	4392462	4392607	7591	4	19	9	28	305	73	1	1	0.048	0.071	-0.023
XLOC_048604	ENSGALT00000044326	12	-	4489668	4489789	4485286	4488056	4492541	4492764	2760	235	0	211	2	180	73	1	1	1	0.977	0.023
XLOC_048607		12	-	4587494	4587757	4586101	4586225	4589944	4590110	1522	11	19	3	18	322	73	0.534127	1	0.116	0.036	0.08
XLOC_048607		12	-	4594456	4594607	4592200	4592346	4598319	4598412	1521	22	1	33	1	210	73	1	1	0.884	0.92	-0.036
XLOC_048359		12	+	4869801	4870252	4866452	4866968	4877316	4878221	2669	1063	2	759	0	510	73	1	1	0.987	1	-0.013
XLOC_048612	ENSGALT00000033956	12	-	4958654	4958753	4957077	4957231	4959702	4959860	9651	26	17	107	17	158	73	0.00384104	0.178412	0.414	0.744	-0.33
XLOC_048612	ENSGALT00000033956	12	-	4971095	4971151	4963531	4963747	4980939	4981107	9650	19	0	73	4	98	73	0.880792	1	1	0.931	0.069
XLOC_048365	ENSGALT00000036274	12	+	5065099	5065316	5061760	5061838	5065416	5065626	2980	4	3	4	0	274	71	0.206948	1	0.257	1	-0.743
XLOC_048365	ENSGALT00000036274	12	+	5068944	5068978	5067415	5067509	5069860	5070035	2979	0	6	1	9	54	73	0.764437	1	0	0.131	-0.131
XLOC_048368	ENSGALT00000008043	12	+	5187714	5187899	5186795	5186961	5189691	5189896	2491	1	0	0	1	244	73	0.396481	1	1	0	1
XLOC_048617	ENSGALT00000008070	12	-	5229933	5230035	5226876	5226983	5232465	5232559	4	58	0	215	1	161	73	1	1	1	0.99	0.01
XLOC_048617	ENSGALT00000008070	12	-	5387067	5387112	5285892	5286175	5411050	5411137	5	4	8	17	7	76	73	0.0754436	0.946362	0.324	0.7	-0.376
XLOC_048617	ENSGALT00000008070	12	-	5387067	5387112	5285892	5286175	5490991	5491021	7	4	0	14	4	38	23	0.41729	1	1	0.679	0.321
XLOC_048617	ENSGALT00000008070	12	-	5411050	5411137	5285892	5286175	5490991	5491021	3	9	0	15	4	96	23	0.190151	1	1	0.473	0.527
XLOC_048370		12	+	5792850	5793143	5783473	5783718	5798351	5799817	48	1	15	0	168	352	73	1	1	0.014	0	0.014
XLOC_048370		12	+	5848608	5848749	5846612	5846714	5854335	5854470	47	3	65	4	139	200	73	1	1	0.017	0.01	0.007
XLOC_048622	ENSGALT00000008287	12	-	6288634	6288896	6282466	6286326	6290023	6290133	8616	8	5	7	4	321	73	1	1	0.267	0.285	-0.018
XLOC_048623	ENSGALT00000008313	12	-	6384833	6384971	6383252	6383394	6385879	6386063	9917	370	33	253	20	197	73	1	1	0.806	0.824	-0.018
XLOC_048625	ENSGALT00000044454	12	-	6633887	6633962	6632693	6632847	6634233	6634376	2471	4	47	0	57	136	73	1	1	0.044	0	0.044
XLOC_048630		12	-	6940210	6940343	6939672	6939795	6942120	6942214	5051	2	145	2	187	192	73	1	1	0.005	0.004	0.001
XLOC_048631	ENSGALT00000008538	12	-	6976052	6976079	6975818	6975884	6976875	6977628	3882	0	16	1	33	26	59	1	1	0	0.064	-0.064
XLOC_048380		12	+	7117939	7118043	7106938	7107135	7129577	7129747	8329	14	1	22	0	163	73	0.611596	1	0.862	1	-0.138
XLOC_048380		12	+	7118532	7118636	7106938	7107135	7129577	7129747	8332	12	1	2	0	163	73	0.965144	1	0.843	1	-0.157
XLOC_048380		12	+	7167620	7167704	7162022	7162133	7176527	7176656	8334	2	1	6	0	146	73	0.33572	1	0.5	1	-0.5
XLOC_048380		12	+	7189510	7189641	7183788	7183890	7195385	7195502	8330	39	1	30	0	190	73	1	1	0.937	1	-0.063
XLOC_048634	ENSGALT00000008659	12	-	7234486	7234577	7233382	7233463	7234991	7235079	137	86	0	412	6	150	73	1	1	1	0.971	0.029
XLOC_048385		12	+	8370669	8370773	8370379	8370515	8371642	8371767	12087	35	1	38	0	163	73	1	1	0.94	1	-0.06
XLOC_048639		12	-	8387991	8388114	8387322	8387482	8388813	8389757	406	17	1	62	0	182	73	0.589048	1	0.872	1	-0.128
XLOC_048639		12	-	8392459	8392516	8388813	8389757	8393741	8393883	407	19	16	40	15	100	73	0.19412	1	0.464	0.661	-0.197
XLOC_048639		12	-	8392459	8392516	8388553	8389634	8393741	8393883	408	11	7	19	0	100	73	0.00513859	0.218134	0.534	1	-0.466
XLOC_048639		12	-	8396572	8396753	8396310	8396489	8398400	8399114	405	57	3	70	3	240	73	1	1	0.852	0.877	-0.025
XLOC_048639		12	-	8402734	8402766	8401919	8402025	8403395	8403523	409	33	1	30	0	50	73	1	1	0.98	1	-0.02
XLOC_048388	ENSGALT00000036257	12	+	8788705	8788756	8788453	8788622	8799020	8799077	3985	7	1	54	3	65	50	0.82905	1	0.843	0.933	-0.09
XLOC_048388	ENSGALT00000036257	12	+	8788705	8788756	8788453	8788622	8789327	8789378	3986	10	16	72	16	59	44	0.000298369	0.0290845	0.318	0.77	-0.452
XLOC_048388	ENSGALT00000036257	12	+	8789327	8789378	8788705	8788756	8799020	8799077	3988	4	0	31	1	36	21	1	1	1	0.948	0.052
XLOC_048388	ENSGALT00000036257	12	+	8789327	8789378	8788705	8788756	8802271	8802352	3989	18	0	50	7	59	44	0.212696	1	1	0.842	0.158
XLOC_048388	ENSGALT00000036257	12	+	8789327	8789378	8788453	8788622	8799020	8799077	3991	17	1	28	3	65	50	1	1	0.929	0.878	0.051
XLOC_048388	ENSGALT00000036257	12	+	8793324	8793387	8789327	8789378	8799020	8799077	3994	0	1	6	12	60	21	0.762366	1	0	0.149	-0.149
XLOC_048388	ENSGALT00000036257	12	+	8793324	8793387	8788453	8788622	8799020	8799077	3995	0	1	5	3	89	50	0.428461	1	0	0.484	-0.484
XLOC_048388	ENSGALT00000036257	12	+	8799020	8799077	8788705	8788756	8802271	8802352	3978	18	0	38	7	71	44	0.115077	1	1	0.771	0.229
XLOC_048388	ENSGALT00000036257	12	+	8799020	8799077	8789327	8789378	8802271	8802352	3979	19	15	49	31	71	44	0.971834	1	0.44	0.495	-0.055
XLOC_048388	ENSGALT00000036257	12	+	8809680	8809755	8808817	8808940	8813722	8814043	3982	117	1	218	0	136	73	1	1	0.984	1	-0.016
XLOC_048388	ENSGALT00000036257	12	+	8820601	8820691	8817120	8817255	8821672	8821795	3984	119	3	151	18	149	73	0.0605308	0.860123	0.951	0.804	0.147
XLOC_048390	ENSGALT00000036256	12	+	8896537	8896627	8896170	8896338	8897439	8897563	9319	42	663	40	431	149	73	1	1	0.03	0.043	-0.013
XLOC_048390	ENSGALT00000036256	12	+	8899161	8899351	8897768	8897925	8901038	8901286	9325	1845	3	1629	0	249	73	1	1	0.994	1	-0.006
XLOC_048390	ENSGALT00000036256	12	+	8902207	8902283	8901038	8901286	8903009	8903112	9318	124	131	96	309	138	73	1.70068e-06	0.000571938	0.334	0.141	0.193
XLOC_048390	ENSGALT00000036256	12	+	8902208	8902283	8901038	8901286	8903009	8903112	9322	212	131	151	309	136	73	5.30103e-11	4.45684e-08	0.465	0.208	0.257
XLOC_048390	ENSGALT00000036256	12	+	8911744	8911877	8909831	8909947	8912915	8913092	9323	643	0	701	1	192	73	1	1	1	0.996	0.004
XLOC_048390	ENSGALT00000036256	12	+	8915300	8915519	8912915	8913092	8916404	8916608	9317	551	88	827	88	278	73	0.265768	1	0.622	0.712	-0.09
XLOC_048391	ENSGALT00000009138	12	+	8930823	8930925	8930111	8930218	8932594	8932658	10283	1	4	3	5	145	57	0.794816	1	0.089	0.191	-0.102
XLOC_048391	ENSGALT00000009138	12	+	8932594	8932658	8930168	8930218	8934184	8934327	10282	12	0	18	1	84	43	0.852689	1	1	0.902	0.098
XLOC_048393	ENSGALT00000009165	12	+	8993232	8993374	8992042	8992130	8994181	8994810	13158	1	9	0	9	201	73	1	1	0.039	0	0.039
XLOC_048398	ENSGALT00000009434	12	+	9100311	9100407	9099648	9099837	9101871	9102115	12856	158	1	260	0	155	73	1	1	0.987	1	-0.013
XLOC_048655		12	-	9454863	9455028	9430344	9430983	9457643	9457740	4611	33	0	65	1	224	73	1	1	1	0.955	0.045
XLOC_048655		12	-	9454863	9455057	9430344	9430983	9457643	9457740	4612	26	0	47	1	253	73	1	1	1	0.931	0.069
XLOC_048408	ENSGALT00000009633	12	+	9616584	9616691	9599475	9599614	9639822	9639959	8614	167	3	73	0	166	73	1	1	0.961	1	-0.039
XLOC_048409	ENSGALT00000009740	12	+	9741628	9741773	9738593	9738835	9742772	9742974	5638	3	19	6	6	204	73	0.119773	1	0.053	0.264	-0.211
XLOC_048411		12	+	9893772	9893955	9887587	9888937	9915635	9915776	2873	280	0	272	1	242	73	1	1	1	0.988	0.012
XLOC_048695	ENSGALT00000010275	12	-	10783395	10783437	10782939	10783133	10783600	10783690	3178	0	24	1	26	70	73	1	1	0	0.039	-0.039
XLOC_048423		12	+	10788867	10788963	10787774	10787885	10789279	10789825	6580	77	0	486	1	155	73	1	1	1	0.996	0.004
XLOC_048425		12	+	10950981	10951017	10946626	10946795	10969337	10969577	3561	17	3	21	0	58	73	0.319696	1	0.877	1	-0.123
XLOC_048425		12	+	10953479	10953545	10950981	10951017	10969337	10969577	3560	4	16	2	21	74	29	1	1	0.089	0.036	0.053
XLOC_048425		12	+	10964665	10964747	10950981	10951017	10969337	10969577	3559	1	16	3	21	102	29	1	1	0.017	0.039	-0.022
XLOC_048425		12	+	10983506	10983631	10983289	10983393	10987850	10987963	3558	60	2	45	0	184	73	0.789476	1	0.922	1	-0.078
XLOC_048703	ENSGALT00000010411	12	-	11049455	11049558	11048826	11048962	11051608	11051689	8573	0	6	1	22	162	73	1	1	0	0.02	-0.02
XLOC_048706		12	-	11341622	11341976	11337644	11338519	11344732	11344808	4860	13	1	13	0	409	69	0.538242	1	0.687	1	-0.313
XLOC_048706		12	-	11341622	11341976	11337644	11338519	11345128	11345182	4861	13	3	14	0	387	47	0.14296	1	0.345	1	-0.655
XLOC_048430		12	+	11371408	11371514	11367191	11367806	11372347	11372559	6138	64	1	86	4	165	73	0.912138	1	0.966	0.905	0.061
XLOC_048430		12	+	11374530	11374569	11373259	11373518	11376125	11376368	6137	11	1	19	0	64	73	0.932448	1	0.926	1	-0.074
XLOC_048431	ENSGALT00000010655	12	+	11441664	11441820	11433743	11433920	11444378	11444558	4926	14	6	18	18	215	73	0.309083	1	0.442	0.253	0.189
XLOC_048434	ENSGALT00000010758	12	+	11462710	11462889	11462463	11462643	11462952	11463094	32	10	0	20	1	238	73	0.792546	1	1	0.86	0.14
XLOC_048442	ENSGALT00000011032	12	+	11559812	11559869	11557721	11558191	11560979	11561108	11773	12	14	2	26	100	73	0.00528222	0.21931	0.385	0.053	0.332
XLOC_048446		12	+	11615479	11615554	11615108	11615171	11616019	11616226	3368	22	0	140	1	119	56	1	1	1	0.985	0.015
XLOC_048446		12	+	11622484	11622556	11621042	11621138	11624699	11624843	3367	0	10	8	53	130	73	0.636774	1	0	0.078	-0.078
XLOC_048714		12	-	11680813	11681160	11669504	11669572	11684507	11684678	8364	140	1	297	1	394	61	1	1	0.956	0.979	-0.023
XLOC_048714		12	-	11682138	11682269	11680813	11681160	11684507	11684774	8365	45	44	37	45	190	73	1	1	0.282	0.24	0.042
XLOC_048449	ENSGALT00000044814	12	+	11692536	11692646	11691907	11691980	11694081	11694206	6984	157	0	339	1	162	66	1	1	1	0.993	0.007
XLOC_048460		12	+	13111001	13111076	13106230	13106354	13113759	13118722	11693	2	1	7	0	136	73	0.311905	1	0.518	1	-0.482
XLOC_048465	ENSGALT00000036231	12	+	13557115	13557220	13536661	13536730	13581570	13581829	3724	15	1	26	0	153	62	0.589992	1	0.859	1	-0.141
XLOC_048726	ENSGALT00000011955	12	-	13775822	13775956	13766284	13766571	13777244	13777404	8412	59	37	83	78	193	73	0.508128	1	0.376	0.287	0.089
XLOC_048729	ENSGALT00000012029	12	-	13985221	13985310	13982897	13983708	13987319	13987458	9660	2	14	13	12	148	73	0.0322396	0.63788	0.066	0.348	-0.282
XLOC_048729	ENSGALT00000012029	12	-	13995265	13995469	13989729	13989820	13999497	13999791	9658	23	8	14	4	263	73	1	1	0.444	0.493	-0.049
XLOC_048729	ENSGALT00000012029	12	-	13995265	13995433	13989729	13989820	13999497	13999791	9659	22	8	14	4	227	73	0.972131	1	0.469	0.53	-0.061
XLOC_048729	ENSGALT00000012029	12	-	14036926	14037019	14034482	14034665	14037845	14037937	9655	1	36	0	13	152	73	1	1	0.013	0	0.013
XLOC_048729	ENSGALT00000012029	12	-	14120890	14120986	14062908	14063028	14133571	14133688	9656	0	12	2	7	155	73	0.464731	1	0	0.119	-0.119
XLOC_048730		12	-	14442282	14442354	14440944	14441016	14446854	14446935	1524	10	1	16	0	122	65	0.568134	1	0.842	1	-0.158
XLOC_048468	ENSGALT00000012239	12	+	14602229	14603344	14601514	14601725	14606021	14606598	9843	367	2	908	3	1174	73	1	1	0.919	0.95	-0.031
XLOC_048731		12	-	14770065	14770162	14764842	14765004	14772748	14772838	2766	201	0	321	2	156	73	1	1	1	0.987	0.013
XLOC_048731		12	-	14806915	14807057	14778183	14778283	14825804	14825897	2765	580	4	356	2	201	73	1	1	0.981	0.985	-0.004
XLOC_048734		12	-	15263385	15263505	15262332	15262435	15264926	15264988	9986	72	0	74	1	161	55	1	1	1	0.962	0.038
XLOC_048734		12	-	15266284	15266353	15264926	15264988	15267480	15267567	9988	23	1	68	1	106	55	1	1	0.923	0.972	-0.049
XLOC_048734		12	-	15269337	15269436	15268649	15268742	15270397	15270501	9983	0	16	2	41	158	73	1	1	0	0.022	-0.022
XLOC_048472	ENSGALT00000046173	12	+	15540468	15540552	15539144	15539372	15541923	15542019	6934	6	8	9	3	146	73	0.185276	1	0.273	0.6	-0.327
XLOC_048751	ENSGALT00000012692	12	-	16597079	16597196	16594062	16596148	16598264	16598366	4821	158	4	113	0	176	73	1	1	0.942	1	-0.058
XLOC_048486	ENSGALT00000012841	12	+	17262559	17262607	17260846	17261017	17264504	17265011	10479	2	0	17	1	82	73	1	1	1	0.938	0.062
XLOC_048486	ENSGALT00000012841	12	+	17290547	17290709	17285337	17285517	17291375	17291507	10480	0	4	4	2	221	73	0.08	0.979214	0	0.398	-0.398
XLOC_048489	ENSGALT00000013444	12	+	18043050	18043178	18025683	18025834	18060723	18060899	10738	94	1	29	0	187	73	1	1	0.973	1	-0.027
XLOC_048758		12	-	18369495	18369578	18367932	18368055	18378965	18379040	6998	22	1	29	2	141	68	1	1	0.914	0.875	0.039
XLOC_048493	ENSGALT00000013506	12	+	18433037	18433082	18431580	18431676	18435429	18435581	8908	2	2	0	1	76	73	0.567952	1	0.49	0	0.49
XLOC_048493	ENSGALT00000013506	12	+	18433037	18433082	18431580	18431676	18435426	18435581	8909	11	6	2	15	76	73	0.00440181	0.197554	0.638	0.114	0.524
XLOC_048762	ENSGALT00000013650	12	-	19325590	19325918	19318976	19323508	19326241	19326391	7037	15	4	45	0	387	73	0.00931575	0.308659	0.414	1	-0.586
XLOC_048763		12	-	19443247	19443363	19442675	19442827	19444168	19444213	5843	127	0	487	1	140	38	1	1	1	0.992	0.008
XLOC_048764	ENSGALT00000013725	12	-	19461524	19461706	19460961	19461140	19461977	19462078	13108	4351	0	12614	1	241	73	1	1	1	1	0
XLOC_048766	ENSGALT00000033241	12	-	19464915	19464990	19464476	19464611	19465473	19466113	2181	9	0	30	1	136	73	1	1	1	0.942	0.058
XLOC_048508		12	+	19493779	19493891	19492689	19492855	19494321	19494470	146	20	0	80	1	171	73	1	1	1	0.972	0.028
XLOC_048512		12	+	19711798	19711869	19710803	19711045	19713674	19713761	2215	21	0	63	1	128	73	1	1	1	0.973	0.027
XLOC_048770	ENSGALT00000013856	12	-	19721468	19721575	19721116	19721204	19721662	19721878	5606	111	0	267	3	166	73	1	1	1	0.975	0.025
XLOC_048772	ENSGALT00000013922	12	-	19825072	19825300	19816478	19816537	19827401	19827531	3215	10	12	11	7	266	52	0.672937	1	0.14	0.235	-0.095
XLOC_048772	ENSGALT00000013922	12	-	19846452	19849360	19827401	19827531	19859753	19859849	3216	1316	0	904	4	2967	73	0.119384	1	1	0.848	0.152
XLOC_053146		13	-	397504	397621	396624	396999	398141	398227	4034	6	1	12	0	176	73	0.419709	1	0.713	1	-0.287
XLOC_053150	ENSGALT00000001396	13	-	943411	943496	926062	928414	957191	957358	10569	533	5	835	3	146	73	1	1	0.982	0.993	-0.011
XLOC_052925	ENSGALT00000045090	13	+	1038190	1038250	1032774	1032884	1046585	1046673	13178	18	6	18	17	106	73	0.151963	1	0.674	0.422	0.252
XLOC_052925	ENSGALT00000045090	13	+	1057558	1058302	1048353	1048456	1065805	1065951	13174	113	5	163	11	803	73	0.720788	1	0.673	0.574	0.099
XLOC_052925	ENSGALT00000045090	13	+	1078528	1078639	1076945	1077092	1080068	1080218	13176	55	4	96	2	170	73	0.525955	1	0.855	0.954	-0.099
XLOC_052925	ENSGALT00000045090	13	+	1086623	1086803	1080518	1082131	1087880	1088135	13177	86	3	89	0	239	73	0.424863	1	0.897	1	-0.103
XLOC_052925	ENSGALT00000045090	13	+	1086671	1086803	1080518	1082131	1087880	1088135	13179	41	3	56	0	191	73	0.196937	1	0.839	1	-0.161
XLOC_052936		13	+	1788963	1789052	1788527	1788673	1789467	1789653	8362	0	28	7	102	148	73	1	1	0	0.033	-0.033
XLOC_052936		13	+	1788979	1789052	1788527	1788673	1789467	1789653	8363	0	28	4	102	132	73	1	1	0	0.021	-0.021
XLOC_053167		13	-	1816363	1816502	1814613	1815514	1816726	1816906	12620	1	113	4	306	198	73	1	1	0.003	0.005	-0.002
XLOC_053168		13	-	1827940	1828062	1823829	1826382	1828652	1829046	4422	890	9	1067	14	181	73	1	1	0.976	0.968	0.008
XLOC_053168		13	-	1828652	1829046	1827940	1828062	1830555	1830946	4420	1874	2	2048	0	453	73	1	1	0.993	1	-0.007
XLOC_053168		13	-	1836867	1836909	1836448	1836552	1837566	1837758	4421	56	0	288	2	70	73	1	1	1	0.993	0.007
XLOC_053168		13	-	1840885	1841220	1837566	1837628	1842325	1848831	4423	92	38	71	76	376	55	0.0171564	0.446955	0.262	0.12	0.142
XLOC_052938	ENSGALT00000003874	13	+	1870004	1870124	1867088	1867113	1890054	1890169	5870	11	0	16	5	124	18	0.107621	1	1	0.317	0.683
XLOC_053182	ENSGALT00000043134	13	-	1989113	1989206	1979612	1979769	2002348	2002501	8339	267	0	314	1	152	73	1	1	1	0.993	0.007
XLOC_052942	ENSGALT00000003545	13	+	2200637	2200711	2192761	2192819	2208006	2208108	6620	0	3	16	1	112	51	0.00483566	0.211199	0	0.879	-0.879
XLOC_052942	ENSGALT00000003545	13	+	2203156	2203265	2200637	2200711	2225454	2225517	6617	3	0	2	23	145	50	0.0120418	0.356797	1	0.029	0.971
XLOC_052942	ENSGALT00000003545	13	+	2203156	2203265	2200637	2200711	2208006	2208108	6618	3	0	1	1	162	67	0.368678	1	1	0.293	0.707
XLOC_052942	ENSGALT00000003545	13	+	2208006	2208108	2200637	2200711	2225454	2225517	6621	3	0	13	23	138	50	0.0800922	0.979214	1	0.17	0.83
XLOC_052942	ENSGALT00000003545	13	+	2208006	2208108	2203156	2203265	2225454	2225517	6622	3	0	12	1	144	56	0.885686	1	1	0.824	0.176
XLOC_052942	ENSGALT00000003545	13	+	2208006	2208108	2192761	2192819	2225454	2225517	6623	6	0	13	22	122	34	0.011416	0.345872	1	0.141	0.859
XLOC_052950		13	+	3912505	3912577	3902986	3903058	3923905	3924049	8064	26	0	57	1	122	65	1	1	1	0.968	0.032
XLOC_052955	ENSGALT00000002909	13	+	4098345	4098464	4078138	4078526	4098944	4099026	1931	3	0	12	1	178	73	0.891452	1	1	0.831	0.169
XLOC_052955	ENSGALT00000002909	13	+	4098345	4098417	4078113	4078526	4098944	4099026	1932	6	0	25	1	130	73	1	1	1	0.934	0.066
XLOC_053198	ENSGALT00000002866	13	-	4121527	4121627	4119002	4119137	4122762	4122810	10426	11	25	22	64	127	41	1	1	0.124	0.1	0.024
XLOC_053199	ENSGALT00000029075	13	-	4141523	4141703	4139573	4140121	4142436	4142526	11630	12	3	3	21	239	73	0.000276005	0.0273001	0.55	0.042	0.508
XLOC_053202	ENSGALT00000002683	13	-	6051072	6051185	6050520	6050714	6052920	6053073	1866	0	114	10	155	172	73	1	1	0	0.027	-0.027
XLOC_053202	ENSGALT00000002683	13	-	6063968	6064127	6062185	6062338	6064718	6064806	1867	34	1	305	6	218	73	1	1	0.919	0.945	-0.026
XLOC_053203		13	-	6079561	6079776	6076401	6079197	6079856	6080051	3154	129	52	148	68	274	73	1	1	0.398	0.367	0.031
XLOC_052960		13	+	6818963	6819014	6808408	6808653	6822486	6822610	7539	0	5	1	5	88	73	0.682719	1	0	0.142	-0.142
XLOC_053209		13	-	7162479	7162582	7162012	7162188	7163292	7163355	9041	69	0	835	19	145	56	1	1	1	0.944	0.056
XLOC_052964	ENSGALT00000041066	13	+	7167783	7167831	7166308	7166374	7168295	7168427	12503	23	42	65	26	68	59	0.000114776	0.0137855	0.322	0.684	-0.362
XLOC_052965	ENSGALT00000045818	13	+	7184032	7184281	7179899	7180031	7185287	7187416	377	70	0	106	7	308	73	0.0606438	0.860123	1	0.782	0.218
XLOC_052966		13	+	7200694	7200905	7192599	7193251	7208455	7208755	1606	30	0	118	1	270	73	1	1	1	0.97	0.03
XLOC_053210		13	-	7215484	7215574	7204589	7204688	7217401	7217577	3817	16	1	12	0	149	73	0.782689	1	0.887	1	-0.113
XLOC_053211		13	-	7309820	7309881	7307892	7308005	7321006	7321357	2585	50	0	94	1	108	73	1	1	1	0.985	0.015
XLOC_052970		13	+	7525810	7525909	7523609	7524244	7526572	7526714	12542	6	17	13	16	158	73	0.401402	1	0.14	0.273	-0.133
XLOC_052970		13	+	7544463	7544567	7543472	7543618	7544794	7544908	12543	63	0	111	1	163	73	1	1	1	0.98	0.02
XLOC_053218		13	-	7688571	7688679	7687647	7688301	7692247	7692303	311	13	0	44	1	143	49	1	1	1	0.938	0.062
XLOC_053218		13	-	7691468	7691543	7688571	7688679	7692247	7692295	310	6	0	14	3	104	41	0.382631	1	1	0.648	0.352
XLOC_052973	ENSGALT00000041028	13	+	7806101	7806185	7803638	7803737	7809514	7809654	2807	98	361	85	431	146	73	1	1	0.12	0.09	0.03
XLOC_053224		13	-	7837145	7837265	7832897	7835634	7842699	7842965	11202	201	14	231	34	179	73	0.177151	1	0.854	0.735	0.119
XLOC_052980		13	+	8234079	8234105	8225867	8225959	8241163	8241268	12797	3	0	8	1	38	73	1	1	1	0.939	0.061
XLOC_052980		13	+	8239541	8239676	8234079	8234105	8241163	8241268	12799	36	0	91	1	140	19	1	1	1	0.925	0.075
XLOC_052990		13	+	8438272	8438345	8431805	8431867	8447992	8448087	6587	60	1	306	5	114	55	1	1	0.967	0.967	0
XLOC_052992		13	+	8491322	8491426	8487003	8487138	8494645	8494823	1303	4	15	5	38	163	73	1	1	0.107	0.056	0.051
XLOC_052992		13	+	8504363	8504437	8503745	8503935	8504572	8504695	1302	53	0	35	1	134	73	1	1	1	0.95	0.05
XLOC_052994		13	+	8793592	8793707	8792600	8792719	8793922	8794104	3836	32	0	65	1	174	73	1	1	1	0.965	0.035
XLOC_052994		13	+	8793922	8794104	8793592	8793707	8797375	8799900	3835	63	1	71	0	241	73	1	1	0.95	1	-0.05
XLOC_052999	ENSGALT00000005039	13	+	9401337	9401553	9400773	9400910	9402786	9402931	7505	68	3	164	2	275	73	0.560255	1	0.857	0.956	-0.099
XLOC_052999	ENSGALT00000005039	13	+	9404159	9404369	9402786	9402931	9404754	9405035	7508	22	0	92	4	269	73	0.544092	1	1	0.862	0.138
XLOC_052999	ENSGALT00000005039	13	+	9406259	9406353	9405447	9405903	9406564	9406611	7503	26	9	55	8	120	40	0.241205	1	0.491	0.696	-0.205
XLOC_052999	ENSGALT00000005039	13	+	9406259	9406301	9405447	9405903	9406564	9406611	7506	22	9	27	8	37	40	0.945539	1	0.725	0.785	-0.06
XLOC_052999	ENSGALT00000005039	13	+	9410948	9411125	9410325	9410370	9411513	9411907	7504	25	8	26	42	201	38	0.00651497	0.252929	0.371	0.105	0.266
XLOC_053243	ENSGALT00000043107	13	-	9500934	9501713	9492192	9492251	9502029	9502181	7161	70	0	62	1	817	52	0.557356	1	1	0.798	0.202
XLOC_053243	ENSGALT00000043107	13	-	9501682	9501713	9492192	9492251	9502029	9502181	7157	12	0	14	1	27	52	1	1	1	0.964	0.036
XLOC_053244	ENSGALT00000004733	13	-	9530585	9530664	9529863	9530146	9530882	9530996	61	448	0	1369	1	144	73	1	1	1	0.999	0.001
XLOC_053008	ENSGALT00000045865	13	+	9645066	9645249	9644043	9644122	9645636	9645757	7242	2	5	6	7	241	72	0.750091	1	0.107	0.204	-0.097
XLOC_053024	ENSGALT00000005847	13	+	9959236	9959421	9951427	9951548	9968665	9968774	886	19	0	54	1	244	73	1	1	1	0.942	0.058
XLOC_053024	ENSGALT00000005847	13	+	9959236	9959450	9951324	9951548	9968665	9968774	887	33	0	78	1	273	73	1	1	1	0.954	0.046
XLOC_053026	ENSGALT00000029074	13	+	10008594	10008743	10006811	10006867	10015686	10015760	11851	4	0	0	15	178	43	0.00258306	0.136149	1	0	1
XLOC_053033	ENSGALT00000028046	13	+	10781066	10781117	10780150	10780495	10782842	10782919	6071	2	3	3	4	85	70	1	1	0.354	0.382	-0.028
XLOC_053266		13	-	10874992	10875065	10846112	10846236	10889067	10889187	459	115	4	63	3	132	73	1	1	0.941	0.921	0.02
XLOC_053272	ENSGALT00000042934	13	-	11466691	11466799	11460660	11465969	11467903	11468002	2894	6	34	14	56	167	73	1	1	0.072	0.099	-0.027
XLOC_053049	ENSGALT00000006950	13	+	12352813	12352861	12350518	12350616	12354596	12354681	5675	21	0	216	1	82	73	1	1	1	0.995	0.005
XLOC_053049	ENSGALT00000006950	13	+	12360994	12361012	12359681	12359735	12361329	12361426	5674	2	4	46	17	11	47	0.21241	1	0.681	0.92	-0.239
XLOC_053050	ENSGALT00000007164	13	+	12372922	12372937	12372344	12372413	12373186	12373378	6859	1	13	0	16	8	62	0.480374	1	0.373	0	0.373
XLOC_053290		13	-	12435221	12435324	12431932	12434723	12435972	12436082	3295	85	1	177	0	162	73	1	1	0.975	1	-0.025
XLOC_053052	ENSGALT00000007299	13	+	12460723	12460885	12460369	12460520	12461369	12461446	4413	2188	0	5285	1	218	70	1	1	1	0.999	0.001
XLOC_053053		13	+	12469040	12469229	12468569	12468660	12469374	12469446	3244	263	388	225	324	240	65	1	1	0.155	0.158	-0.003
XLOC_053053		13	+	12469040	12469229	12468569	12468660	12469604	12470130	3245	211	9	196	24	248	73	0.0549871	0.827152	0.873	0.706	0.167
XLOC_053053		13	+	12469374	12469446	12468569	12468660	12469604	12470118	3242	473	9	636	24	130	73	1	1	0.967	0.937	0.03
XLOC_053053		13	+	12469374	12469446	12469040	12469229	12469604	12470118	3243	137	0	342	1	130	73	1	1	1	0.995	0.005
XLOC_053284	ENSGALT00000040514	13	-	12476123	12476297	12475619	12475863	12478165	12478311	6149	26	10	55	32	233	73	0.650879	1	0.449	0.35	0.099
XLOC_053294		13	-	12623603	12623779	12623220	12623318	12624145	12624558	5986	16	1	12	0	235	73	0.678945	1	0.833	1	-0.167
XLOC_053294		13	-	12625710	12625889	12624145	12624558	12627831	12627963	5985	0	19	1	24	238	73	1	1	0	0.013	-0.013
XLOC_053062		13	+	12781360	12781541	12780470	12781249	12783198	12786234	6992	4	1	20	0	240	73	0.246689	1	0.549	1	-0.451
XLOC_053296	ENSGALT00000009500	13	-	12784293	12784383	12783546	12783791	12784832	12784989	3532	87	8	240	9	149	73	0.499542	1	0.842	0.929	-0.087
XLOC_053296	ENSGALT00000009500	13	-	12784293	12784380	12783546	12783791	12784832	12784989	3533	69	8	175	9	146	73	0.489155	1	0.812	0.907	-0.095
XLOC_053067		13	+	12903685	12903745	12896772	12897090	12904735	12904873	13374	240	186	380	152	106	73	0.000796983	0.061615	0.471	0.633	-0.162
XLOC_053067		13	+	12907577	12907716	12905928	12906072	12908723	12908902	13375	1171	17	1709	5	198	73	1	1	0.962	0.992	-0.03
XLOC_053067		13	+	12907577	12907757	12905928	12906072	12908723	12908902	13376	745	17	1258	5	239	73	0.720412	1	0.93	0.987	-0.057
XLOC_053300	ENSGALT00000009631	13	-	12920990	12921056	12920411	12920481	12921617	12922036	8890	3	0	88	1	108	63	1	1	1	0.981	0.019
XLOC_053071		13	+	13266271	13266505	13265657	13265832	13269874	13270004	7206	4	59	10	73	293	73	1	1	0.017	0.033	-0.016
XLOC_053075		13	+	13448293	13448519	13447094	13447252	13450206	13450273	2343	276	0	300	5	272	60	0.69243	1	1	0.93	0.07
XLOC_053075		13	+	13449712	13449803	13448293	13448519	13450206	13450273	2344	102	0	150	4	137	60	1	1	1	0.943	0.057
XLOC_053075		13	+	13451796	13451891	13451527	13451694	13452064	13452194	2342	209	1	160	0	154	73	1	1	0.99	1	-0.01
XLOC_053303	ENSGALT00000023233	13	-	13608732	13608832	13604785	13607908	13625738	13625823	5124	22	0	63	1	159	73	1	1	1	0.967	0.033
XLOC_053078		13	+	13618770	13618931	13618026	13618101	13619025	13619142	11968	49	0	19	2	215	68	0.158159	1	1	0.75	0.25
XLOC_053078		13	+	13618843	13618931	13618026	13618101	13619025	13619142	11969	45	0	16	2	142	68	0.186136	1	1	0.793	0.207
XLOC_053078		13	+	13620803	13620893	13620126	13620281	13621100	13621231	11967	55	1	32	0	149	73	1	1	0.964	1	-0.036
XLOC_053081		13	+	13715117	13715183	13712677	13712825	13716351	13716563	8138	7	16	7	38	118	73	0.479657	1	0.213	0.102	0.111
XLOC_053081		13	+	13720942	13721038	13719674	13719758	13723213	13723297	8139	59	17	103	23	155	73	0.932559	1	0.62	0.678	-0.058
XLOC_053309		13	-	13749642	13750242	13747148	13747299	13751936	13752082	4192	0	2	85	17	659	73	0.0377677	0.684705	0	0.356	-0.356
XLOC_053086		13	+	14533410	14533543	14532759	14532856	14534502	14534654	9087	6	0	456	1	192	73	1	1	1	0.994	0.006
XLOC_053088	ENSGALT00000010281	13	+	14767063	14767163	14762253	14762361	14772495	14772585	8068	26	3	92	2	159	73	0.293905	1	0.799	0.955	-0.156
XLOC_053088	ENSGALT00000010281	13	+	14767063	14767163	14762253	14762361	14768608	14768699	8069	12	7	56	9	159	73	0.0880667	1	0.44	0.741	-0.301
XLOC_053088	ENSGALT00000010281	13	+	14767063	14768699	14762250	14762361	14772495	14772585	8074	167	3	182	2	1695	73	0.842609	1	0.706	0.797	-0.091
XLOC_053088	ENSGALT00000010281	13	+	14768608	14768695	14762253	14762361	14771918	14771956	8067	7	0	9	2	104	31	0.355249	1	1	0.573	0.427
XLOC_053088	ENSGALT00000010281	13	+	14768608	14768699	14762250	14762361	14772495	14772585	8071	12	3	18	2	150	73	0.621177	1	0.661	0.814	-0.153
XLOC_053088	ENSGALT00000010281	13	+	14768608	14768699	14762250	14762361	14771918	14772020	8072	7	0	9	2	150	73	0.371049	1	1	0.687	0.313
XLOC_053088	ENSGALT00000010281	13	+	14768608	14768699	14767063	14767163	14772495	14772585	8073	5	14	9	36	150	73	1	1	0.148	0.108	0.04
XLOC_053088	ENSGALT00000010281	13	+	14771918	14772020	14768608	14768699	14772495	14772585	8070	4	5	8	9	161	73	1	1	0.266	0.287	-0.021
XLOC_053327		13	-	15019343	15019460	15019002	15019085	15020231	15020280	9446	2	0	0	4	145	42	0.071506	0.919597	1	0	1
XLOC_053327		13	-	15019343	15020280	15019002	15019085	15020911	15020990	9447	89	6	64	16	995	72	0.0275515	0.58499	0.518	0.224	0.294
XLOC_053328		13	-	15045754	15045873	15045123	15045179	15046636	15046749	7481	164	1	243	0	154	49	1	1	0.981	1	-0.019
XLOC_053329	ENSGALT00000010368	13	-	15093881	15094343	15091709	15091827	15099552	15099669	6217	152	0	164	1	521	73	1	1	1	0.958	0.042
XLOC_053333		13	-	15799614	15799926	15795300	15798095	15803619	15804131	10355	142	3	148	0	371	73	0.465418	1	0.903	1	-0.097
XLOC_053333		13	-	15815465	15815489	15812995	15813216	15817467	15817591	10356	2	20	0	16	34	73	0.420589	1	0.177	0	0.177
XLOC_053333		13	-	15823836	15823851	15822103	15822344	15824901	15825059	10354	10	8	6	10	16	73	0.577346	1	0.851	0.732	0.119
XLOC_053336	ENSGALT00000010610	13	-	15927271	15927355	15926252	15926324	15929510	15929602	4090	3	2	3	6	138	65	0.51903	1	0.414	0.191	0.223
XLOC_053339	ENSGALT00000010797	13	-	16066847	16066907	16066679	16066779	16069248	16069302	2851	10	0	7	9	80	47	0.00495321	0.213858	1	0.314	0.686
XLOC_053339	ENSGALT00000010797	13	-	16072839	16072983	16070197	16070268	16073079	16073256	2847	6	37	2	76	194	64	1	1	0.051	0.009	0.042
XLOC_053105	ENSGALT00000039928	13	+	16255887	16256014	16255082	16255272	16256267	16256461	7405	88	2	161	0	186	73	1	1	0.945	1	-0.055
XLOC_053342	ENSGALT00000011105	13	-	16288811	16288968	16287719	16287900	16290027	16291065	10120	20	2	30	0	216	73	0.245996	1	0.772	1	-0.228
XLOC_053345	ENSGALT00000011543	13	-	16495883	16496037	16493076	16493203	16510010	16510448	2899	6	23	12	14	213	73	0.209373	1	0.082	0.227	-0.145
XLOC_053120		13	+	16798250	16798306	16798063	16798138	16803486	16803574	11607	0	7	1	16	93	68	1	1	0	0.044	-0.044
XLOC_053124	ENSGALT00000012154	13	+	17290546	17290696	17288768	17288903	17292243	17292391	3198	73	3	58	0	209	73	0.442253	1	0.895	1	-0.105
XLOC_053125	ENSGALT00000012177	13	+	17329671	17329914	17326713	17326948	17335081	17335282	1908	101	7	139	0	302	73	0.0123491	0.364299	0.777	1	-0.223
XLOC_053125	ENSGALT00000012177	13	+	17333703	17333766	17326713	17326948	17335081	17335282	1910	5	7	2	0	112	73	0.228624	1	0.318	1	-0.682
XLOC_053125	ENSGALT00000012177	13	+	17333703	17333766	17329671	17329914	17335081	17335282	1911	6	20	7	15	112	73	0.872556	1	0.164	0.233	-0.069
XLOC_053125	ENSGALT00000012177	13	+	17346334	17346482	17344421	17344572	17349235	17349400	1907	18	45	0	69	207	73	0.0095444	0.311629	0.124	0	0.124
XLOC_053130	ENSGALT00000012413	13	+	17624557	17624663	17621674	17621842	17628010	17628135	12599	49	1	62	1	165	73	1	1	0.956	0.965	-0.009
XLOC_056061	ENSGALT00000004425	14	+	68646	68743	68471	68564	69869	69974	10708	98	0	174	1	156	73	1	1	1	0.988	0.012
XLOC_056312	ENSGALT00000034401	14	-	74173	74271	73524	73638	74560	74614	5308	62	0	87	1	131	47	1	1	1	0.969	0.031
XLOC_056312	ENSGALT00000034401	14	-	75368	76796	74560	74614	77947	78056	5306	172	0	148	1	1461	47	0.580918	1	1	0.826	0.174
XLOC_056312	ENSGALT00000034401	14	-	75368	75422	74560	74614	77947	78056	5307	6	0	18	1	68	47	1	1	1	0.926	0.074
XLOC_056312	ENSGALT00000034401	14	-	78820	78923	78671	78737	80322	80468	5313	138	3	115	4	148	59	1	1	0.948	0.92	0.028
XLOC_056312	ENSGALT00000034401	14	-	84641	84794	84124	84212	85245	85354	5309	59	0	101	3	212	73	0.691665	1	1	0.921	0.079
XLOC_056312	ENSGALT00000034401	14	-	92998	93058	91615	91679	93531	93661	5311	10	0	18	1	90	57	0.959863	1	1	0.919	0.081
XLOC_056062	ENSGALT00000004615	14	+	215361	215530	207265	207405	218782	218901	978	3	6	11	14	228	73	0.939563	1	0.138	0.201	-0.063
XLOC_056314	ENSGALT00000004641	14	-	274617	275040	262294	262896	291705	291924	10074	150	4	342	14	482	73	0.894984	1	0.85	0.787	0.063
XLOC_056066		14	+	742078	742234	739622	740648	744875	745034	5963	50	2	58	3	215	73	1	1	0.895	0.868	0.027
XLOC_056321	ENSGALT00000004886	14	-	810894	811005	810739	810809	812595	812671	11714	54	0	91	2	156	59	1	1	1	0.945	0.055
XLOC_056071	ENSGALT00000004992	14	+	892478	892608	889727	889825	896080	896174	303	18	1	57	6	189	73	0.838129	1	0.874	0.786	0.088
XLOC_056073	ENSGALT00000005357	14	+	962864	962896	961989	962126	963365	963465	11235	5	2	37	0	50	73	0.186753	1	0.785	1	-0.215
XLOC_056074	ENSGALT00000005427	14	+	983060	983145	982681	982781	983621	983774	7480	29	0	71	5	146	73	0.344185	1	1	0.877	0.123
XLOC_056331		14	-	1114184	1114359	1112811	1112947	1115810	1115867	8143	12	0	17	1	211	50	0.661528	1	1	0.801	0.199
XLOC_056331		14	-	1128072	1128255	1127445	1127568	1129455	1129688	8146	59	0	51	1	242	73	1	1	1	0.939	0.061
XLOC_056336		14	-	1585846	1585915	1584882	1585022	1586128	1586203	6886	5	0	0	1	119	68	0.15883	1	1	0	1
XLOC_056341	ENSGALT00000034276	14	-	1990420	1991605	1989750	1990300	1993056	1993183	5989	132	0	59	1	1244	73	0.423022	1	1	0.776	0.224
XLOC_056087	ENSGALT00000006001	14	+	2145451	2145647	2142292	2142354	2152039	2152136	7426	2	0	5	2	237	55	0.556634	1	1	0.367	0.633
XLOC_056087	ENSGALT00000006001	14	+	2145451	2145647	2142292	2142354	2157678	2157873	7427	3	0	8	2	237	55	0.555959	1	1	0.481	0.519
XLOC_056087	ENSGALT00000006001	14	+	2152039	2152136	2145768	2145822	2157678	2157873	7421	81	17	71	32	130	47	0.0990744	1	0.633	0.445	0.188
XLOC_056087	ENSGALT00000006001	14	+	2152039	2152136	2142331	2142354	2157678	2157873	7422	74	0	57	2	99	16	0.30961	1	1	0.822	0.178
XLOC_056087	ENSGALT00000006001	14	+	2152039	2152136	2145451	2145647	2157678	2157873	7423	74	1	55	3	156	73	0.732771	1	0.972	0.896	0.076
XLOC_056087	ENSGALT00000006001	14	+	2159417	2159444	2158191	2158382	2159543	2159738	7420	13	0	79	3	40	73	1	1	1	0.98	0.02
XLOC_056087	ENSGALT00000006001	14	+	2161327	2161450	2159543	2159738	2162440	2162524	7431	50	1	102	6	182	73	0.719985	1	0.953	0.872	0.081
XLOC_056087	ENSGALT00000006001	14	+	2161327	2161450	2159543	2159738	2165069	2165163	7432	19	0	45	2	182	73	0.735789	1	1	0.9	0.1
XLOC_056087	ENSGALT00000006001	14	+	2162440	2162524	2159543	2159738	2165069	2165163	7433	1	0	16	2	146	73	0.974974	1	1	0.8	0.2
XLOC_056087	ENSGALT00000006001	14	+	2162440	2162524	2161327	2161450	2165069	2165163	7434	31	0	70	3	146	73	0.739603	1	1	0.921	0.079
XLOC_056087	ENSGALT00000006001	14	+	2162840	2162951	2162428	2162524	2165069	2165163	7429	35	0	75	10	170	73	0.0467476	0.77149	1	0.763	0.237
XLOC_056087	ENSGALT00000006001	14	+	2164315	2164414	2162440	2162524	2165069	2165163	7424	14	0	19	10	158	73	0.0136313	0.391813	1	0.467	0.533
XLOC_056087	ENSGALT00000006001	14	+	2164315	2164414	2162840	2162951	2165069	2165163	7425	34	0	58	2	158	73	0.904106	1	1	0.931	0.069
XLOC_056344	ENSGALT00000045850	14	-	2235683	2235819	2234623	2235333	2235895	2236026	13291	45	0	62	14	195	73	0.00201924	0.117081	1	0.624	0.376
XLOC_056344	ENSGALT00000045850	14	-	2235683	2235795	2234673	2235333	2235895	2236026	13292	77	0	120	14	171	73	0.00586031	0.232746	1	0.785	0.215
XLOC_056348	ENSGALT00000006473	14	-	2532461	2532713	2531840	2531916	2532781	2532957	8209	4	104	4	31	307	69	1	1	0.009	0.028	-0.019
XLOC_056355		14	-	3100817	3100899	3094181	3094372	3101721	3101794	10942	6	13	65	49	139	66	0.116472	1	0.18	0.386	-0.206
XLOC_056359	ENSGALT00000006863	14	-	3248087	3248189	3242658	3242741	3250240	3250316	9389	4	14	7	36	157	69	1	1	0.112	0.079	0.033
XLOC_056104	ENSGALT00000007042	14	+	3832736	3832796	3830760	3830896	3834736	3834838	939	0	8	10	3	106	73	0.00116999	0.0802996	0	0.697	-0.697
XLOC_056367	ENSGALT00000007259	14	-	4090130	4090206	4089702	4089811	4090489	4090607	601	148	0	75	1	138	73	1	1	1	0.975	0.025
XLOC_056367	ENSGALT00000007259	14	-	4108117	4108246	4106233	4106408	4108704	4108841	603	294	9	212	7	188	73	1	1	0.927	0.922	0.005
XLOC_056367	ENSGALT00000007259	14	-	4113943	4114149	4113619	4113766	4114241	4114344	602	91	1	84	0	265	73	1	1	0.962	1	-0.038
XLOC_056371	ENSGALT00000007417	14	-	4266086	4266288	4265194	4265279	4267758	4267879	4520	257	1	254	0	261	73	1	1	0.986	1	-0.014
XLOC_056374	ENSGALT00000007484	14	-	4372690	4372782	4370683	4370788	4375922	4375961	10799	59	2	420	0	110	32	0.386135	1	0.896	1	-0.104
XLOC_056374	ENSGALT00000007484	14	-	4372696	4372782	4370683	4370788	4375922	4375968	10800	16	2	165	0	112	39	0.103155	1	0.736	1	-0.264
XLOC_056119		14	+	4542662	4542740	4540193	4541384	4546128	4546327	3711	3	0	6	1	142	73	0.724835	1	1	0.755	0.245
XLOC_056120	ENSGALT00000007615	14	+	4596808	4596853	4596155	4596269	4601395	4601497	7294	33	17	150	36	76	73	0.173229	1	0.651	0.8	-0.149
XLOC_056120	ENSGALT00000007615	14	+	4625269	4625417	4619128	4619298	4632167	4632273	7295	116	1	241	0	207	73	1	1	0.976	1	-0.024
XLOC_056120	ENSGALT00000007615	14	+	4625307	4625417	4619128	4619298	4632167	4632273	7293	52	1	103	0	169	73	1	1	0.957	1	-0.043
XLOC_056121	ENSGALT00000007656	14	+	4685883	4686150	4685636	4685796	4691407	4691549	8568	21	59	26	83	326	73	1	1	0.074	0.066	0.008
XLOC_056121	ENSGALT00000007656	14	+	4685916	4686150	4685636	4685796	4691407	4691549	8569	18	59	24	83	293	73	1	1	0.071	0.067	0.004
XLOC_056121	ENSGALT00000007656	14	+	4685993	4686150	4685636	4685796	4691407	4691549	8570	13	59	15	83	216	73	1	1	0.069	0.058	0.011
XLOC_056121	ENSGALT00000007656	14	+	4702651	4706521	4699591	4699708	4708314	4708462	8562	399	115	300	77	3929	73	1	1	0.061	0.068	-0.007
XLOC_056121	ENSGALT00000007656	14	+	4702651	4706546	4699591	4699708	4708314	4708462	8567	390	115	291	77	3954	73	1	1	0.059	0.065	-0.006
XLOC_056121	ENSGALT00000007656	14	+	4712899	4712965	4711697	4711783	4715066	4715108	8565	58	7	90	6	80	35	0.704991	1	0.784	0.868	-0.084
XLOC_056121	ENSGALT00000007656	14	+	4712899	4712961	4711697	4711783	4715066	4715189	8566	63	7	89	6	110	73	1	1	0.857	0.908	-0.051
XLOC_056387		14	-	4740795	4740969	4739726	4739813	4741762	4741903	13466	337	0	540	1	233	73	1	1	1	0.994	0.006
XLOC_056397	ENSGALT00000008050	14	-	5079738	5079868	5079213	5079327	5080334	5080520	4885	13	2	27	0	189	73	0.172438	1	0.715	1	-0.285
XLOC_056134	ENSGALT00000008119	14	+	5115056	5115173	5112712	5112819	5115765	5115916	11280	68	29	86	98	176	73	0.00384623	0.178412	0.493	0.267	0.226
XLOC_056134	ENSGALT00000008119	14	+	5122506	5122562	5118906	5119022	5124849	5124998	11281	72	0	138	2	98	73	1	1	1	0.981	0.019
XLOC_056136		14	+	5207645	5207738	5205856	5206030	5208698	5208914	8753	87	2	146	0	152	73	1	1	0.954	1	-0.046
XLOC_056141		14	+	5771525	5771536	5758582	5759080	5797919	5798068	6493	0	6	5	0	8	73	0.00478847	0.210505	0	1	-1
XLOC_056411	ENSGALT00000008510	14	-	5972568	5972613	5972177	5972288	5973362	5973507	11331	0	1	1	6	76	73	0.991011	1	0	0.138	-0.138
XLOC_056414		14	-	6031212	6031289	6028410	6030929	6031484	6031586	133	9	0	18	2	140	73	0.540374	1	1	0.824	0.176
XLOC_056414		14	-	6031212	6031292	6027791	6030929	6031484	6031586	134	17	0	41	2	146	73	0.795188	1	1	0.911	0.089
XLOC_056415		14	-	6036301	6036410	6036010	6036114	6037440	6037558	1335	182	1	267	0	168	73	1	1	0.988	1	-0.012
XLOC_056415		14	-	6039342	6039424	6039046	6039228	6041985	6042027	1339	0	11	4	25	108	35	1	1	0	0.049	-0.049
XLOC_056415		14	-	6041985	6042027	6039046	6039228	6042196	6042404	1336	13	7	42	34	70	73	0.720412	1	0.659	0.563	0.096
XLOC_056415		14	-	6041985	6042027	6039046	6039228	6042310	6042404	1337	11	0	25	5	70	73	0.274996	1	1	0.839	0.161
XLOC_056422	ENSGALT00000008981	14	-	6198864	6199401	6198606	6198788	6199832	6199950	8605	39	59	9	111	596	73	0.284653	1	0.075	0.01	0.065
XLOC_056160	ENSGALT00000009056	14	+	6275936	6276068	6273287	6273382	6277791	6277956	3744	10	2	8	3	191	73	0.723558	1	0.656	0.505	0.151
XLOC_056160	ENSGALT00000009056	14	+	6275939	6276068	6273287	6273382	6277791	6277956	3745	9	2	12	3	188	73	1	1	0.636	0.608	0.028
XLOC_056160	ENSGALT00000009056	14	+	6281797	6281866	6280461	6280677	6283751	6283912	3743	3	10	5	10	124	73	0.865397	1	0.15	0.227	-0.077
XLOC_056424	ENSGALT00000009168	14	-	6327075	6327207	6325870	6326046	6328300	6329050	11141	115	1	60	1	191	73	1	1	0.978	0.958	0.02
XLOC_056424	ENSGALT00000009168	14	-	6340737	6340962	6339632	6339802	6341475	6341547	11138	7	18	3	11	276	65	1	1	0.084	0.06	0.024
XLOC_056424	ENSGALT00000009168	14	-	6340746	6341017	6339632	6339802	6341475	6341547	11142	9	18	8	11	322	65	1	1	0.092	0.128	-0.036
XLOC_056162	ENSGALT00000009263	14	+	6423088	6423205	6419240	6419332	6424492	6424585	6132	37	0	93	5	176	73	0.374357	1	1	0.885	0.115
XLOC_056162	ENSGALT00000009263	14	+	6423088	6423278	6419240	6419332	6424492	6424585	6133	20	0	58	5	249	73	0.279804	1	1	0.773	0.227
XLOC_056163	ENSGALT00000009446	14	+	6477824	6477939	6476566	6476642	6478648	6478801	7388	2	34	1	60	170	69	1	1	0.023	0.007	0.016
XLOC_056430	ENSGALT00000009586	14	-	6571317	6571560	6569215	6569379	6572776	6572933	7093	97	13	143	8	302	73	0.192534	1	0.643	0.812	-0.169
XLOC_056430	ENSGALT00000009586	14	-	6577691	6577773	6575534	6575662	6577930	6577999	7092	100	0	104	1	135	62	1	1	1	0.979	0.021
XLOC_056174	ENSGALT00000043663	14	+	6770044	6770083	6768064	6768164	6770735	6770772	11148	0	6	7	26	32	30	0.318943	1	0	0.202	-0.202
XLOC_056174	ENSGALT00000043663	14	+	6775389	6775434	6770735	6770772	6777835	6777924	11147	6	1	2	0	38	30	0.844707	1	0.826	1	-0.174
XLOC_056174	ENSGALT00000043663	14	+	6785096	6785198	6783876	6784738	6786575	6788324	11146	27	10	26	3	161	73	0.184281	1	0.55	0.797	-0.247
XLOC_056175	ENSGALT00000009788	14	+	6837741	6837789	6835152	6835500	6841518	6844110	9891	19	11	28	21	82	73	0.923044	1	0.606	0.543	0.063
XLOC_056175	ENSGALT00000009788	14	+	6844515	6844527	6841518	6844110	6844938	6845103	9886	1	13	0	30	10	73	0.359292	1	0.36	0	0.36
XLOC_056175	ENSGALT00000009788	14	+	6848419	6848566	6847933	6848076	6848734	6848872	9887	1	27	6	29	206	73	0.939521	1	0.013	0.068	-0.055
XLOC_056175	ENSGALT00000009788	14	+	6850452	6850485	6849678	6849889	6852032	6852167	9885	1	19	0	68	52	73	0.595698	1	0.069	0	0.069
XLOC_056181		14	+	6982549	6982638	6981552	6982098	6983754	6983847	2863	16	1	36	0	148	73	0.664249	1	0.888	1	-0.112
XLOC_056189	ENSGALT00000010366	14	+	7372679	7372796	7369512	7369608	7377072	7377198	11350	10	89	10	113	176	73	1	1	0.045	0.035	0.01
XLOC_056193	ENSGALT00000010414	14	+	7430900	7431034	7427846	7428023	7432989	7433125	1833	29	0	83	4	193	73	0.496471	1	1	0.887	0.113
XLOC_056193	ENSGALT00000010414	14	+	7441395	7441584	7439580	7439693	7443680	7443743	1832	48	1	72	0	231	56	0.878303	1	0.921	1	-0.079
XLOC_056444	ENSGALT00000010534	14	-	7561115	7561147	7558069	7558306	7562255	7562428	12055	64	705	95	716	50	73	1	1	0.117	0.162	-0.045
XLOC_056196	ENSGALT00000010749	14	+	7640680	7640818	7639787	7639913	7641921	7642047	11510	73	0	199	1	197	73	1	1	1	0.987	0.013
XLOC_056196	ENSGALT00000010749	14	+	7656219	7656346	7655366	7655436	7657412	7657589	11511	128	1	278	0	176	63	1	1	0.979	1	-0.021
XLOC_056446		14	-	7697192	7697323	7696924	7697086	7697510	7697688	10566	4	4	1	2	190	73	0.83743	1	0.278	0.161	0.117
XLOC_056450		14	-	8375673	8375837	8371653	8371809	8383153	8383266	9178	66	1	128	3	223	73	1	1	0.956	0.933	0.023
XLOC_056455	ENSGALT00000011158	14	-	8475563	8475703	8473897	8474967	8476086	8476165	12239	2	0	4	4	198	72	0.321281	1	1	0.267	0.733
XLOC_056202	ENSGALT00000011200	14	+	8502832	8502886	8502571	8502671	8503302	8503393	2110	0	2	1	2	94	73	0.600797	1	0	0.28	-0.28
XLOC_056456	ENSGALT00000039934	14	-	8520859	8521131	8519941	8520034	8521211	8521837	6290	11	18	17	37	331	73	1	1	0.119	0.092	0.027
XLOC_056204	ENSGALT00000011230	14	+	8558985	8559518	8544435	8544707	8567208	8567966	4522	27	13	19	6	592	73	0.820002	1	0.204	0.281	-0.077
XLOC_056204	ENSGALT00000011230	14	+	8558985	8559198	8544489	8544707	8567208	8567393	4524	23	13	23	6	272	73	0.339105	1	0.322	0.507	-0.185
XLOC_056204	ENSGALT00000011230	14	+	8561473	8562233	8558985	8559198	8567208	8567967	4521	22	1	31	6	819	73	0.254319	1	0.662	0.315	0.347
XLOC_056204	ENSGALT00000011230	14	+	8562137	8562233	8558985	8559198	8567208	8567965	4523	5	1	6	6	155	73	0.275372	1	0.702	0.32	0.382
XLOC_056207		14	+	8643656	8643707	8641978	8642303	8645509	8645610	5762	10	6	21	11	88	73	1	1	0.58	0.613	-0.033
XLOC_056211	ENSGALT00000011449	14	+	8756227	8756443	8754425	8755856	8756957	8757125	1872	4	0	7	1	275	73	0.666689	1	1	0.65	0.35
XLOC_056211	ENSGALT00000011449	14	+	8759314	8759450	8758744	8759103	8761381	8761572	1870	2	1	5	0	195	73	0.364596	1	0.428	1	-0.572
XLOC_056211	ENSGALT00000011449	14	+	8772838	8772991	8772540	8772638	8774411	8774601	1875	0	2	1	0	212	73	0.28198	1	0	1	-1
XLOC_056211	ENSGALT00000011449	14	+	8772953	8772991	8772540	8772638	8774411	8774604	1873	0	2	1	0	62	73	0.270469	1	0	1	-1
XLOC_056462		14	-	8901081	8901188	8897298	8899466	8902676	8902876	6626	3	1	4	2	166	73	0.932844	1	0.569	0.468	0.101
XLOC_056464	ENSGALT00000011608	14	-	8990763	8991962	8985336	8985429	9001260	9001407	2249	466	0	511	1	1258	73	1	1	1	0.967	0.033
XLOC_056464	ENSGALT00000011608	14	-	8993223	8993304	8990763	8991962	9001260	9001407	2247	6	14	0	9	146	73	0.141101	1	0.176	0	0.176
XLOC_056464	ENSGALT00000011608	14	-	8996348	8996472	8990763	8991962	9001260	9001407	2248	8	14	8	9	183	73	0.842279	1	0.186	0.262	-0.076
XLOC_056221		14	+	9103481	9103518	9098743	9098849	9106155	9106281	9684	0	1	2	2	60	73	0.566067	1	0	0.549	-0.549
XLOC_056223	ENSGALT00000042714	14	+	9199841	9199935	9197568	9197680	9200912	9201059	7149	110	0	201	2	153	73	1	1	1	0.98	0.02
XLOC_056223	ENSGALT00000042714	14	+	9200912	9201059	9197568	9197680	9201629	9204188	7150	145	0	233	1	206	73	1	1	1	0.988	0.012
XLOC_056224		14	+	9357823	9358059	9355979	9356105	9365031	9365192	5956	107	1	42	0	295	73	1	1	0.964	1	-0.036
XLOC_056224		14	+	9357829	9358059	9355979	9356105	9365031	9365192	5957	144	1	51	0	289	73	1	1	0.973	1	-0.027
XLOC_056224		14	+	9388539	9388778	9376618	9376806	9390261	9392574	5955	137	1	40	0	298	73	1	1	0.971	1	-0.029
XLOC_056510	ENSGALT00000000404	14	-	10114153	10114269	10113432	10113756	10114385	10114456	12275	2	0	0	1	166	64	0.268131	1	1	0	1
XLOC_056514		14	-	11922807	11923069	11920170	11920320	11926048	11926183	3904	8	0	30	2	321	73	0.665799	1	1	0.773	0.227
XLOC_056514		14	-	11922807	11923093	11920170	11920320	11926048	11926183	3905	8	0	20	2	345	73	0.533381	1	1	0.679	0.321
XLOC_056516		14	-	11990728	11990833	11987720	11987934	11992743	11992874	6364	4	9	3	22	164	73	0.525629	1	0.165	0.057	0.108
XLOC_056516		14	-	11990728	11990830	11987720	11987934	11992743	11992874	6365	4	9	3	22	161	73	0.519435	1	0.168	0.058	0.11
XLOC_056242	ENSGALT00000044116	14	+	12110804	12110938	12110506	12110714	12111336	12111602	5673	11	1	14	0	193	73	0.553399	1	0.806	1	-0.194
XLOC_056244	ENSGALT00000012090	14	+	12222166	12222343	12219557	12220111	12223515	12223761	11677	42	2	43	0	236	73	0.43937	1	0.867	1	-0.133
XLOC_056536		14	-	12260246	12260344	12256987	12257296	12262784	12262814	2809	0	17	10	24	107	23	0.452912	1	0	0.082	-0.082
XLOC_056537	ENSGALT00000012185	14	-	12275087	12275189	12273322	12273421	12278199	12278294	1565	1	35	2	42	161	73	1	1	0.013	0.021	-0.008
XLOC_056538	ENSGALT00000012226	14	-	12299229	12299301	12298282	12298354	12303291	12303716	338	5	1	21	0	122	65	0.334207	1	0.727	1	-0.273
XLOC_056543		14	-	12347434	12347695	12345683	12346691	12347849	12348118	914	165	3	434	8	320	73	1	1	0.926	0.925	0.001
XLOC_056544		14	-	12349362	12349407	12348862	12348957	12350080	12350188	8550	0	5	3	28	76	73	0.847038	1	0	0.093	-0.093
XLOC_056544		14	-	12355217	12355283	12352864	12353088	12356112	12356222	8551	1	21	3	44	118	73	1	1	0.029	0.04	-0.011
XLOC_056551	ENSGALT00000039566	14	-	12523926	12524106	12523508	12523695	12524756	12525173	1305	148	58	83	29	239	73	1	1	0.438	0.466	-0.028
XLOC_056551	ENSGALT00000039566	14	-	12599956	12600078	12598405	12598554	12601409	12601569	1306	1	24	0	32	181	73	1	1	0.017	0	0.017
XLOC_056551	ENSGALT00000039566	14	-	12614923	12615028	12611197	12611415	12619799	12619972	1307	85	7	105	13	164	73	0.892688	1	0.844	0.782	0.062
XLOC_056255	ENSGALT00000012696	14	+	12734867	12735020	12733621	12733828	12736289	12736437	10517	81	0	188	1	212	73	1	1	1	0.985	0.015
XLOC_056255	ENSGALT00000012696	14	+	12742086	12742191	12739604	12739702	12743009	12743768	10518	21	39	32	61	164	73	1	1	0.193	0.189	0.004
XLOC_056559		14	-	12835102	12835258	12834764	12835009	12836165	12836338	4800	2	5	14	19	215	73	0.826723	1	0.12	0.2	-0.08
XLOC_056258		14	+	12854180	12854327	12852781	12852920	12855094	12855160	7684	2	0	62	1	192	59	1	1	1	0.95	0.05
XLOC_056260	ENSGALT00000004283	14	+	12993186	12993302	12991876	12992065	12994682	12994797	1642	43	0	79	1	175	73	1	1	1	0.971	0.029
XLOC_056260	ENSGALT00000004283	14	+	12993186	12993342	12991876	12992065	12994682	12994797	1643	80	0	143	1	215	73	1	1	1	0.98	0.02
XLOC_056263	ENSGALT00000004199	14	+	13035552	13035585	13034105	13034293	13036087	13036261	11321	2	16	6	77	52	73	1	1	0.149	0.099	0.05
XLOC_056263	ENSGALT00000004199	14	+	13039747	13039882	13036087	13036261	13042432	13042468	11322	1	3	3	20	150	29	1	1	0.061	0.028	0.033
XLOC_056264		14	+	13057210	13057252	13055454	13056303	13059818	13059992	6581	1	1	0	1	70	73	0.619356	1	0.51	0	0.51
XLOC_056267		14	+	13111351	13111389	13111140	13111274	13111842	13111962	4071	4	2	2	0	62	73	0.530795	1	0.702	1	-0.298
XLOC_056566	ENSGALT00000039392	14	-	13220225	13220348	13219143	13219249	13221083	13221176	9474	3	0	7	2	182	73	0.529606	1	1	0.584	0.416
XLOC_056566	ENSGALT00000039392	14	-	13220225	13220347	13219143	13219249	13221083	13221176	9476	4	0	13	2	181	73	0.623378	1	1	0.724	0.276
XLOC_056275	ENSGALT00000044951	14	+	13231112	13231162	13230051	13230135	13231518	13231653	8847	9	2	10	0	86	73	0.333757	1	0.793	1	-0.207
XLOC_056275	ENSGALT00000044951	14	+	13231112	13231208	13230051	13230135	13231518	13231653	8856	32	2	24	0	155	73	0.551069	1	0.883	1	-0.117
XLOC_056275	ENSGALT00000044951	14	+	13239436	13239565	13238832	13238951	13240522	13240666	8844	27	5	23	4	188	73	1	1	0.677	0.691	-0.014
XLOC_056275	ENSGALT00000044951	14	+	13239436	13239565	13238832	13238951	13244797	13244840	8846	16	0	14	1	151	36	0.542075	1	1	0.769	0.231
XLOC_056275	ENSGALT00000044951	14	+	13240522	13240666	13238832	13238951	13244797	13244840	8854	8	0	11	1	166	36	0.616148	1	1	0.705	0.295
XLOC_056275	ENSGALT00000044951	14	+	13248311	13248401	13247735	13247988	13250667	13252351	8848	3	2	7	10	149	73	0.654806	1	0.424	0.255	0.169
XLOC_056278	ENSGALT00000003218	14	+	13380391	13380540	13379745	13379849	13381602	13381692	8763	18	1	41	2	208	73	1	1	0.863	0.878	-0.015
XLOC_056278	ENSGALT00000003218	14	+	13383103	13383225	13382060	13382171	13383478	13383517	8766	45	0	56	1	140	32	0.972902	1	1	0.928	0.072
XLOC_056278	ENSGALT00000003218	14	+	13383103	13383517	13382060	13382171	13384079	13384139	8767	55	1	64	0	453	53	0.651833	1	0.865	1	-0.135
XLOC_056278	ENSGALT00000003218	14	+	13383147	13383225	13382060	13382171	13383478	13383517	8765	2	0	13	1	101	32	0.949642	1	1	0.805	0.195
XLOC_056278	ENSGALT00000003218	14	+	13383478	13383517	13382060	13382171	13384079	13384139	8764	0	1	10	0	44	53	0.130867	1	0	1	-1
XLOC_056281	ENSGALT00000003142	14	+	13412548	13412868	13403263	13403922	13435446	13436944	6101	12	0	8	5	379	73	0.0289602	0.603054	1	0.236	0.764
XLOC_056287	ENSGALT00000000053	14	+	13563899	13563978	13563685	13563789	13565612	13565740	154	10	0	31	2	144	73	0.750798	1	1	0.887	0.113
XLOC_056578		14	-	13850990	13851084	13850129	13850332	13851494	13851698	10944	18	1	35	3	153	73	1	1	0.896	0.848	0.048
XLOC_056580	ENSGALT00000015029	14	-	13898899	13898954	13898348	13898518	13899311	13899451	7201	2	1	42	0	96	73	0.221587	1	0.603	1	-0.397
XLOC_056582	ENSGALT00000015002	14	-	13937840	13937861	13934346	13934505	13940131	13941154	4782	1	5	3	16	28	73	1	1	0.343	0.328	0.015
XLOC_056587		14	-	14283208	14283293	14282636	14282736	14283955	14284104	1043	15	5	21	5	146	73	0.890595	1	0.6	0.677	-0.077
XLOC_056293	ENSGALT00000002721	14	+	14337625	14337649	14333741	14333833	14340412	14340464	8547	2	1	1	0	17	45	0.816351	1	0.841	1	-0.159
XLOC_056293	ENSGALT00000002721	14	+	14357057	14357069	14350769	14350888	14360388	14360446	8541	2	10	2	25	5	51	0.562368	1	0.671	0.449	0.222
XLOC_056293	ENSGALT00000002721	14	+	14378326	14378365	14376936	14377050	14381904	14382084	8538	3	14	4	16	64	73	1	1	0.196	0.222	-0.026
XLOC_056295		14	+	14402452	14402695	14401708	14401847	14405653	14405740	6059	233	5	369	7	302	73	1	1	0.918	0.927	-0.009
XLOC_056594		14	-	14761581	14761728	14757807	14758676	14768126	14768245	6901	89	0	234	1	206	73	1	1	1	0.988	0.012
XLOC_056594		14	-	14814201	14814370	14812437	14812537	14815627	14815649	6900	48	0	94	41	170	15	5.61784e-06	0.00164285	1	0.168	0.832
XLOC_056305		14	+	14971201	14971284	14967432	14967673	14972895	14973054	1675	2	0	12	1	146	73	0.978773	1	1	0.857	0.143
XLOC_056305		14	+	14971201	14971925	14967228	14967673	14972895	14973054	1676	26	0	29	1	783	73	0.569342	1	1	0.73	0.27
XLOC_056305		14	+	14971457	14971607	14971260	14971284	14972895	14973054	1677	5	0	6	9	153	17	0.0544489	0.824828	1	0.069	0.931
XLOC_056308	ENSGALT00000003923	14	+	15088751	15088816	15087071	15087221	15089576	15089633	5798	36	2	159	0	93	50	0.541755	1	0.906	1	-0.094
XLOC_059866	ENSGALT00000001983	15	-	37502	37523	34597	34673	38241	38463	2122	0	35	1	79	24	69	1	1	0	0.035	-0.035
XLOC_059866	ENSGALT00000001983	15	-	50124	50305	49661	49825	50719	50884	2124	61	2	134	0	240	73	0.612728	1	0.903	1	-0.097
XLOC_059641	ENSGALT00000002108	15	+	135999	136120	135562	135688	138164	138254	5567	126	1	162	0	180	73	1	1	0.981	1	-0.019
XLOC_059641	ENSGALT00000002108	15	+	136747	136907	135999	136120	138164	138254	5566	240	0	276	1	219	73	1	1	1	0.989	0.011
XLOC_059646		15	+	516662	516763	515571	515688	517515	517630	8350	4	185	5	72	160	73	1	1	0.01	0.031	-0.021
XLOC_059881		15	-	623968	624014	623284	623347	624134	624184	3023	4	0	14	1	31	26	1	1	1	0.922	0.078
XLOC_059650	ENSGALT00000002464	15	+	674202	674269	673361	673438	675449	679203	9840	4	0	66	1	117	70	1	1	1	0.975	0.025
XLOC_059651	ENSGALT00000001634	15	+	713343	713478	710116	710240	713925	714043	8535	558	0	1223	1	194	73	1	1	1	0.998	0.002
XLOC_059887	ENSGALT00000002979	15	-	939704	939920	932949	934951	944528	944627	8923	36	0	76	1	275	73	1	1	1	0.953	0.047
XLOC_059887	ENSGALT00000002979	15	-	948314	948477	944528	944627	950162	950288	8924	22	0	30	1	222	73	0.863228	1	1	0.908	0.092
XLOC_059890		15	-	1052160	1052274	1049118	1050764	1054792	1054884	1186	3	17	17	8	173	73	0.00172487	0.106436	0.069	0.473	-0.404
XLOC_059890		15	-	1129470	1129509	1121865	1122024	1187801	1187867	1184	4	24	4	23	50	59	1	1	0.164	0.17	-0.006
XLOC_059890		15	-	1174054	1174299	1121865	1122024	1178491	1178593	1189	34	6	21	0	304	73	0.0788435	0.97303	0.576	1	-0.424
XLOC_059890		15	-	1174054	1174299	1121865	1122024	1187801	1187867	1190	35	24	22	23	290	59	0.811958	1	0.229	0.163	0.066
XLOC_059890		15	-	1178491	1178593	1174054	1174299	1187801	1187867	1187	8	2	13	1	147	59	0.53838	1	0.616	0.839	-0.223
XLOC_059890		15	-	1178491	1178593	1121865	1122024	1187801	1187867	1188	13	24	13	23	147	59	1	1	0.179	0.185	-0.006
XLOC_059890		15	-	1237517	1237586	1187801	1187867	1253515	1253617	1191	35	5	41	7	110	59	1	1	0.79	0.759	0.031
XLOC_059890		15	-	1253515	1253574	1237517	1237586	1253875	1254180	1185	24	4	23	1	93	62	0.461873	1	0.8	0.939	-0.139
XLOC_059661	ENSGALT00000003199	15	+	1258280	1258398	1255678	1255739	1267348	1267419	243	6	0	90	2	149	45	1	1	1	0.931	0.069
XLOC_059661	ENSGALT00000003199	15	+	1263304	1263419	1263006	1263126	1267348	1267419	242	51	0	192	2	165	64	1	1	1	0.974	0.026
XLOC_059892	ENSGALT00000003358	15	-	1427126	1427144	1426158	1426352	1427171	1427363	3738	3	99	1	72	22	73	1	1	0.091	0.044	0.047
XLOC_059893		15	-	1439774	1439783	1439362	1439517	1440353	1440518	2485	1	44	2	71	4	73	1	1	0.293	0.34	-0.047
XLOC_059893		15	-	1455118	1455400	1454177	1454290	1457780	1458133	2486	154	0	287	2	341	73	1	1	1	0.968	0.032
XLOC_059893		15	-	1455241	1455400	1454177	1454290	1457780	1458133	2484	106	0	272	2	218	73	1	1	1	0.979	0.021
XLOC_059897	ENSGALT00000003452	15	-	1563435	1563531	1560065	1560137	1564451	1564502	7380	4	2	11	0	118	36	0.117306	1	0.379	1	-0.621
XLOC_059900	ENSGALT00000003682	15	-	2579294	2579342	2578144	2578281	2579580	2579754	10097	1	10	8	11	82	73	0.110741	1	0.082	0.393	-0.311
XLOC_059900	ENSGALT00000003682	15	-	2604897	2605005	2603805	2604185	2605412	2605500	10096	4	7	4	6	167	73	1	1	0.2	0.226	-0.026
XLOC_059900	ENSGALT00000003682	15	-	2609255	2609366	2605400	2605500	2611343	2612668	10095	4	47	3	27	170	73	1	1	0.035	0.046	-0.011
XLOC_059902		15	-	2634257	2634401	2631415	2631736	2634987	2635103	7544	25	1	51	0	203	73	0.72646	1	0.9	1	-0.1
XLOC_059905	ENSGALT00000003918	15	-	2784174	2784330	2782788	2782914	2788691	2788966	3874	62	9	79	15	215	73	0.940247	1	0.701	0.641	0.06
XLOC_059905	ENSGALT00000003918	15	-	2803109	2803180	2801413	2801588	2803853	2803950	3875	4	61	4	57	128	73	1	1	0.036	0.038	-0.002
XLOC_059907		15	-	3161436	3161532	3158802	3158925	3164954	3165038	1342	17	18	11	7	155	73	0.642723	1	0.308	0.425	-0.117
XLOC_059679	ENSGALT00000034743	15	+	3198489	3198617	3197767	3197878	3200027	3202073	7094	36	60	47	74	187	73	1	1	0.19	0.199	-0.009
XLOC_059679	ENSGALT00000034743	15	+	3198489	3198538	3197767	3197878	3200027	3200215	7095	11	60	11	74	84	73	1	1	0.137	0.114	0.023
XLOC_059911	ENSGALT00000034720	15	-	3741116	3741350	3740278	3740427	3746654	3746830	12289	2	0	3	2	293	73	0.448494	1	1	0.272	0.728
XLOC_059911	ENSGALT00000034720	15	-	3741116	3741353	3740278	3740427	3746654	3746898	12292	1	0	3	2	296	73	0.636958	1	1	0.27	0.73
XLOC_059914	ENSGALT00000004577	15	-	4465907	4466005	4463068	4463183	4473218	4473332	6106	56	0	90	2	157	73	1	1	1	0.954	0.046
XLOC_059686	ENSGALT00000004770	15	+	4509689	4509838	4508302	4508497	4511400	4511529	7499	0	1	1	1	208	73	0.657499	1	0	0.26	-0.26
XLOC_059692	ENSGALT00000046182	15	+	4835625	4835798	4833481	4833577	4847204	4847351	3726	4	0	19	3	232	73	0.588208	1	1	0.666	0.334
XLOC_059919	ENSGALT00000039540	15	-	4916431	4916582	4915643	4915783	4917055	4917268	2466	135	1	210	0	210	73	1	1	0.979	1	-0.021
XLOC_059919	ENSGALT00000039540	15	-	4925276	4925402	4924849	4924938	4925863	4926011	2465	23	1	45	0	185	73	0.733478	1	0.901	1	-0.099
XLOC_059919	ENSGALT00000039540	15	-	4931142	4931243	4930696	4930893	4931483	4931679	2463	28	0	34	1	160	73	1	1	1	0.939	0.061
XLOC_059919	ENSGALT00000039540	15	-	4931142	4931240	4930696	4930893	4931483	4931679	2464	22	0	29	1	157	73	1	1	1	0.931	0.069
XLOC_059920	ENSGALT00000005240	15	-	4953013	4953206	4950575	4950683	4954402	4954637	12129	646	0	1168	3	252	73	1	1	1	0.991	0.009
XLOC_059695	ENSGALT00000005250	15	+	4971487	4971575	4967875	4967968	4974008	4976849	9932	4	54	1	100	147	73	1	1	0.035	0.005	0.03
XLOC_059697	ENSGALT00000005363	15	+	5005924	5005969	5004131	5004441	5006345	5006446	7363	1	57	6	78	76	73	1	1	0.017	0.069	-0.052
XLOC_059701	ENSGALT00000005779	15	+	5089885	5089985	5080126	5080347	5130855	5131028	4392	23	5	52	1	159	73	0.0492113	0.798866	0.679	0.96	-0.281
XLOC_059701	ENSGALT00000005779	15	+	5160462	5160567	5157277	5157373	5161477	5161548	4390	42	1	80	0	155	64	1	1	0.945	1	-0.055
XLOC_059701	ENSGALT00000005779	15	+	5178355	5178520	5171262	5171433	5181753	5181902	4391	40	1	31	10	224	73	0.00837011	0.291018	0.929	0.503	0.426
XLOC_059701	ENSGALT00000005779	15	+	5179824	5180028	5178355	5178520	5181753	5181902	4393	35	0	26	5	263	73	0.0271788	0.582023	1	0.591	0.409
XLOC_059702	ENSGALT00000005860	15	+	5202724	5202801	5202390	5202584	5203400	5203512	8088	3	21	0	35	140	73	0.522391	1	0.069	0	0.069
XLOC_059930	ENSGALT00000039252	15	-	5436608	5436704	5436058	5436187	5436947	5437035	13238	1	9	3	8	155	73	0.675128	1	0.05	0.15	-0.1
XLOC_059931	ENSGALT00000006725	15	-	5471478	5471580	5470936	5471155	5471836	5471998	982	35	26	20	76	161	73	0.00020497	0.0221676	0.379	0.107	0.272
XLOC_059931	ENSGALT00000006725	15	-	5477335	5477605	5474043	5474717	5478125	5478212	983	76	8	153	11	329	73	0.801171	1	0.678	0.755	-0.077
XLOC_059931	ENSGALT00000006725	15	-	5477335	5477596	5474043	5474717	5478125	5478212	985	76	8	135	11	320	73	0.992411	1	0.684	0.737	-0.053
XLOC_059931	ENSGALT00000006725	15	-	5523561	5523618	5521713	5521840	5527098	5527214	984	0	8	8	12	100	73	0.0513828	0.807152	0	0.327	-0.327
XLOC_059931	ENSGALT00000006725	15	-	5527098	5527214	5521713	5521840	5537576	5537730	986	16	0	39	1	175	73	1	1	1	0.942	0.058
XLOC_059933	ENSGALT00000039226	15	-	5612988	5613510	5612365	5612415	5614412	5614547	11897	4	6	13	6	551	43	0.523653	1	0.049	0.145	-0.096
XLOC_059719	ENSGALT00000006984	15	+	5710419	5710528	5705934	5706204	5714099	5714181	10952	0	5	4	17	168	73	0.655195	1	0	0.093	-0.093
XLOC_059719	ENSGALT00000006984	15	+	5712275	5712322	5705934	5706204	5714099	5714181	10949	0	5	1	17	80	73	1	1	0	0.051	-0.051
XLOC_059938	ENSGALT00000007031	15	-	5797217	5797344	5796704	5796836	5797713	5797773	9690	13	0	37	4	166	53	0.345002	1	1	0.747	0.253
XLOC_059938	ENSGALT00000007031	15	-	5797217	5797338	5796704	5796836	5797713	5797773	9691	18	0	49	4	160	53	0.355132	1	1	0.802	0.198
XLOC_059939	ENSGALT00000007064	15	-	5808021	5808138	5807191	5807366	5808858	5809085	10959	45	1	101	0	176	73	1	1	0.949	1	-0.051
XLOC_059940	ENSGALT00000043449	15	-	5839500	5839605	5835645	5836572	5844847	5844908	758	25	37	19	27	145	54	1	1	0.201	0.208	-0.007
XLOC_059940	ENSGALT00000043449	15	-	5843706	5843739	5835855	5836572	5844847	5844908	754	1	37	0	27	33	54	1	1	0.042	0	0.042
XLOC_059940	ENSGALT00000043449	15	-	5843706	5843739	5839500	5839605	5844847	5844908	755	1	10	0	2	33	54	0.956194	1	0.141	0	0.141
XLOC_059940	ENSGALT00000043449	15	-	5848068	5848163	5847349	5847547	5849569	5849786	753	2	52	0	46	154	73	1	1	0.018	0	0.018
XLOC_059941	ENSGALT00000007145	15	-	5881055	5881139	5880243	5880355	5881738	5881854	12985	24	0	101	3	146	73	1	1	1	0.944	0.056
XLOC_059942	ENSGALT00000007158	15	-	5897118	5897190	5896593	5896737	5897732	5897923	11707	0	53	1	52	130	73	1	1	0	0.011	-0.011
XLOC_059942	ENSGALT00000007158	15	-	5899534	5899612	5897732	5897923	5900505	5900549	11708	5	14	16	76	106	37	1	1	0.111	0.068	0.043
XLOC_059725	ENSGALT00000007191	15	+	5915320	5915424	5914821	5914920	5915578	5915684	10830	14	0	80	1	163	73	1	1	1	0.973	0.027
XLOC_059943	ENSGALT00000039111	15	-	5940447	5940459	5938469	5938661	5940870	5940908	10509	0	26	34	55	5	31	0.000102109	0.0127182	0	0.793	-0.793
XLOC_059950	ENSGALT00000007367	15	-	6138529	6138600	6137506	6137814	6139402	6139510	1806	103	0	125	2	128	73	1	1	1	0.973	0.027
XLOC_059950	ENSGALT00000007367	15	-	6144218	6144428	6141998	6142181	6145937	6146116	1807	30	40	34	28	269	73	0.631477	1	0.169	0.248	-0.079
XLOC_059950	ENSGALT00000007367	15	-	6144218	6144428	6141998	6142181	6146628	6146826	1808	17	2	16	0	269	73	0.312664	1	0.698	1	-0.302
XLOC_059950	ENSGALT00000007367	15	-	6145937	6146116	6142121	6142181	6146628	6146826	1811	161	2	103	0	218	53	1	1	0.951	1	-0.049
XLOC_059951	ENSGALT00000007407	15	-	6178082	6178186	6176168	6177464	6180081	6180171	3102	89	1	166	0	163	73	1	1	0.976	1	-0.024
XLOC_059951	ENSGALT00000007407	15	-	6180081	6180171	6178082	6178186	6181831	6181941	3103	32	1	156	0	149	73	1	1	0.94	1	-0.06
XLOC_059731		15	+	6190698	6190847	6190128	6190298	6191643	6191838	8548	12	1	13	0	208	73	0.584188	1	0.808	1	-0.192
XLOC_059732	ENSGALT00000007523	15	+	6203841	6203946	6202945	6203139	6205102	6205243	7056	210	1	972	0	164	73	1	1	0.989	1	-0.011
XLOC_059733		15	+	6226684	6226872	6223522	6223603	6229104	6229225	8353	41	0	146	1	247	73	1	1	1	0.977	0.023
XLOC_059954	ENSGALT00000007633	15	-	6265593	6265717	6265250	6265316	6265938	6266182	6730	25	0	68	1	169	59	1	1	1	0.96	0.04
XLOC_059736	ENSGALT00000007665	15	+	6292325	6292400	6290911	6291314	6292666	6292933	2197	1	48	1	45	136	73	1	1	0.011	0.012	-0.001
XLOC_059736	ENSGALT00000007665	15	+	6293729	6293800	6292666	6292933	6293992	6294205	2195	21	3	20	5	128	73	0.741787	1	0.8	0.695	0.105
XLOC_059955		15	-	6324383	6324519	6323529	6323712	6324700	6324903	7997	146	1	129	0	195	73	1	1	0.982	1	-0.018
XLOC_059961		15	-	6546593	6546793	6540620	6540743	6560175	6560293	3069	264	0	261	1	259	73	1	1	1	0.987	0.013
XLOC_059749		15	+	6742057	6742143	6741631	6741728	6742828	6742911	4594	35	1	41	0	146	73	1	1	0.946	1	-0.054
XLOC_059967		15	-	6790900	6790960	6787083	6790534	6791359	6791424	530	21	2	38	0	91	58	0.380707	1	0.87	1	-0.13
XLOC_059751	ENSGALT00000022468	15	+	6794215	6794363	6793994	6794144	6795001	6795252	2640	35	4	108	1	207	73	0.0759218	0.947403	0.755	0.974	-0.219
XLOC_059752	ENSGALT00000008642	15	+	6925700	6925763	6924816	6924941	6926193	6926261	7826	0	2	2	2	100	61	0.380627	1	0	0.379	-0.379
XLOC_059753	ENSGALT00000008845	15	+	6987357	6987532	6986366	6986622	6988418	6988546	9078	202	1	207	0	234	73	1	1	0.984	1	-0.016
XLOC_059968	ENSGALT00000008976	15	-	7155372	7155447	7154056	7154669	7155540	7155684	7694	0	1	5	3	136	73	0.428623	1	0	0.472	-0.472
XLOC_059973		15	-	7531825	7531910	7529558	7531016	7534280	7534403	4064	26	87	58	94	146	73	0.163349	1	0.13	0.236	-0.106
XLOC_059974		15	-	7558594	7558618	7557663	7557793	7560676	7560753	10325	1	31	6	17	31	70	0.0354823	0.661091	0.068	0.444	-0.376
XLOC_059976	ENSGALT00000009136	15	-	7680827	7680984	7679132	7679213	7683543	7683629	7752	11	12	8	40	216	73	0.0766015	0.954114	0.237	0.063	0.174
XLOC_059976	ENSGALT00000009136	15	-	7684065	7684229	7683708	7683898	7684944	7685031	7755	13	0	47	1	223	73	1	1	1	0.939	0.061
XLOC_059763	ENSGALT00000009152	15	+	7692628	7692767	7692169	7692314	7692960	7693008	3607	5	33	11	122	166	41	1	1	0.036	0.022	0.014
XLOC_059977	ENSGALT00000038558	15	-	7701918	7702079	7701420	7701545	7702328	7702427	9005	8	0	27	1	220	73	0.964428	1	1	0.9	0.1
XLOC_059991	ENSGALT00000038506	15	-	8013505	8013599	8012236	8012432	8013968	8014042	8599	13	0	75	4	147	67	0.720467	1	1	0.895	0.105
XLOC_059991	ENSGALT00000038506	15	-	8013968	8014042	8013505	8013599	8014507	8014570	8602	16	0	54	2	117	56	0.976126	1	1	0.928	0.072
XLOC_059781		15	+	8095183	8095293	8094931	8095003	8095549	8095658	10085	0	1	22	0	161	65	0.0778503	0.962539	0	1	-1
XLOC_059781		15	+	8095183	8095290	8094677	8095003	8095549	8095658	10086	0	1	32	0	166	73	0.0739544	0.934673	0	1	-1
XLOC_059781		15	+	8095264	8095290	8094438	8095003	8095549	8095658	10084	0	1	10	0	38	73	0.160676	1	0	1	-1
XLOC_059785		15	+	8215946	8216111	8205630	8205922	8217995	8218222	1601	56	0	44	3	224	73	0.189824	1	1	0.827	0.173
XLOC_059996		15	-	8334697	8334787	8331711	8331857	8337859	8337931	4875	3	0	30	9	141	65	0.464892	1	1	0.606	0.394
XLOC_059791		15	+	8436381	8436530	8435732	8435817	8437276	8437442	152	1	19	2	20	208	73	1	1	0.018	0.034	-0.016
XLOC_059791		15	+	8436413	8436530	8435732	8435817	8437276	8437442	150	0	19	1	20	176	73	1	1	0	0.02	-0.02
XLOC_060002		15	-	8671639	8673193	8626873	8627058	8673535	8673626	102	947	0	695	1	1613	73	1	1	1	0.969	0.031
XLOC_060009	ENSGALT00000010946	15	-	8859610	8859727	8858739	8858848	8859845	8859978	342	6	3	2	16	176	73	0.0184518	0.451297	0.453	0.049	0.404
XLOC_060009	ENSGALT00000010946	15	-	8862810	8862873	8861116	8861268	8865713	8865822	343	2	3	4	30	112	73	0.347409	1	0.303	0.08	0.223
XLOC_059797	ENSGALT00000011126	15	+	8946061	8946227	8941883	8943843	8948180	8948417	10038	32	2	68	0	225	73	0.27231	1	0.838	1	-0.162
XLOC_059798	ENSGALT00000011172	15	+	8990975	8991155	8990512	8990648	8993203	8993433	8806	57	0	139	51	239	73	1.33346e-06	0.000472046	1	0.454	0.546
XLOC_059798	ENSGALT00000011172	15	+	8996103	8996183	8995246	8995430	8996550	8996690	8805	37	1	128	0	146	73	1	1	0.949	1	-0.051
XLOC_060014		15	-	9005549	9005719	9004954	9005085	9006216	9006286	10663	14	0	43	1	219	63	1	1	1	0.925	0.075
XLOC_060014		15	-	9007119	9007243	9006485	9006661	9007366	9007477	10662	42	0	121	1	183	73	1	1	1	0.98	0.02
XLOC_059799	ENSGALT00000011231	15	+	9017893	9018038	9016145	9017425	9019729	9019793	10125	0	2	4	17	188	57	1	1	0	0.067	-0.067
XLOC_059799	ENSGALT00000011231	15	+	9023140	9023212	9019729	9019793	9025564	9025736	10124	1	6	10	10	114	57	0.186605	1	0.077	0.333	-0.256
XLOC_060019		15	-	9185296	9185460	9182873	9183561	9185679	9185762	10276	68	0	128	1	223	73	1	1	1	0.977	0.023
XLOC_060019		15	-	9185296	9185416	9183411	9183561	9185679	9185762	10277	42	0	78	1	179	73	1	1	1	0.97	0.03
XLOC_059807	ENSGALT00000011539	15	+	9256832	9256982	9256621	9256764	9257165	9257249	13230	9	0	67	2	209	73	1	1	1	0.921	0.079
XLOC_060029	ENSGALT00000011661	15	-	9298034	9298174	9297229	9297490	9298380	9298519	4333	467	0	1048	22	199	73	1	1	1	0.946	0.054
XLOC_059816	ENSGALT00000044217	15	+	9420960	9421096	9420259	9420461	9431259	9431433	12333	130	0	192	2	195	73	1	1	1	0.973	0.027
XLOC_059816	ENSGALT00000044217	15	+	9431565	9431633	9431259	9431433	9431777	9431951	12334	1	73	2	103	122	73	1	1	0.008	0.011	-0.003
XLOC_059817		15	+	9438676	9438794	9438382	9438568	9438995	9439136	11185	4	736	7	817	177	73	1	1	0.002	0.004	-0.002
XLOC_059820		15	+	9594222	9594590	9592069	9592189	9595898	9596069	3915	0	4	1	21	427	73	1	1	0	0.008	-0.008
XLOC_059820		15	+	9610783	9610837	9608377	9608575	9618562	9618760	3914	2	0	21	3	94	73	0.862192	1	1	0.845	0.155
XLOC_059821	ENSGALT00000011968	15	+	9869336	9869543	9866515	9866683	9876759	9876894	5077	71	4	74	0	266	73	0.140673	1	0.83	1	-0.17
XLOC_059826	ENSGALT00000038225	15	+	9987472	9987543	9986006	9986158	9990076	9990119	1435	28	0	23	2	91	36	0.325998	1	1	0.82	0.18
XLOC_059826	ENSGALT00000038225	15	+	9987472	9987642	9985803	9986158	9990076	9990717	1436	91	0	76	2	229	73	0.845783	1	1	0.924	0.076
XLOC_059826	ENSGALT00000038225	15	+	9995953	9996043	9994783	9994894	9996365	9996474	1434	0	1	1	13	149	73	1	1	0	0.036	-0.036
XLOC_060048	ENSGALT00000044969	15	-	10089099	10089200	10086358	10086499	10089399	10089560	1942	93	1	257	0	160	73	1	1	0.977	1	-0.023
XLOC_060063		15	-	10928317	10928344	10923730	10926464	10929612	10929701	3701	0	13	1	22	40	73	0.976629	1	0	0.077	-0.077
XLOC_060063		15	-	10930171	10930282	10929612	10929701	10931994	10933396	3699	18	1	40	1	170	73	0.996333	1	0.885	0.945	-0.06
XLOC_060063		15	-	10968901	10969053	10966649	10966727	10971020	10971098	3700	6	4	3	14	207	69	0.0976725	1	0.333	0.067	0.266
XLOC_060063		15	-	10968901	10969086	10966649	10966727	10971020	10971098	3702	6	4	4	14	240	69	0.163956	1	0.301	0.076	0.225
XLOC_059844	ENSGALT00000013103	15	+	11043609	11043721	11038969	11039050	11045893	11045903	3117	34	0	73	2	101	3	0.463061	1	1	0.52	0.48
XLOC_060066		15	-	11066822	11066867	11060099	11061133	11068666	11068826	6582	6	6	10	28	76	73	0.26723	1	0.49	0.255	0.235
XLOC_060070	ENSGALT00000044651	15	-	11173842	11173933	11172143	11172453	11174277	11174362	1930	1	2	8	3	150	73	0.355255	1	0.196	0.565	-0.369
XLOC_059851	ENSGALT00000013355	15	+	11334123	11334256	11333184	11333361	11336730	11336921	9189	25	3	71	0	192	73	0.0645949	0.87863	0.76	1	-0.24
XLOC_060074	ENSGALT00000013375	15	-	11426190	11426291	11423567	11423721	11427778	11427855	12285	1	0	3	4	157	70	0.481346	1	1	0.251	0.749
XLOC_060079	ENSGALT00000013542	15	-	12580980	12581052	12580734	12580887	12581290	12581386	461	129	0	91	1	130	73	1	1	1	0.981	0.019
XLOC_060080		15	-	12614875	12615052	12613139	12613253	12617053	12617178	8148	43	0	52	2	236	73	0.5545	1	1	0.889	0.111
XLOC_062302	ENSGALT00000044830	16	-	45076	45160	44637	44770	45766	45856	2875	11	9	20	10	146	73	0.647618	1	0.379	0.5	-0.121
XLOC_062302	ENSGALT00000044830	16	-	45076	45552	44637	44770	45766	45856	2879	33	9	70	10	535	73	0.403789	1	0.333	0.489	-0.156
XLOC_062302	ENSGALT00000044830	16	-	45462	45552	45076	45160	45766	45856	2876	24	1	63	0	149	73	0.82399	1	0.922	1	-0.078
XLOC_062302	ENSGALT00000044830	16	-	45462	45552	44637	44770	45766	45856	2877	13	9	38	10	149	73	0.18944	1	0.414	0.651	-0.237
XLOC_062302	ENSGALT00000044830	16	-	46206	46281	45960	46063	46615	46706	2878	93	0	122	5	136	73	0.88113	1	1	0.929	0.071
XLOC_062275	ENSGALT00000043207	16	+	61461	61494	61269	61302	61650	61856	1212	4	1	3	0	26	26	0.672686	1	0.8	1	-0.2
XLOC_062276	ENSGALT00000045907	16	+	71877	72014	71646	71806	72191	74461	30	13	1	16	0	196	73	0.584107	1	0.829	1	-0.171
XLOC_062277	ENSGALT00000000212	16	+	90370	90467	89698	89999	90831	90969	12154	12	47	20	69	156	73	1	1	0.107	0.119	-0.012
XLOC_062315		16	-	137222	137382	136309	136362	138916	139034	12592	9	0	15	2	192	46	0.419942	1	1	0.642	0.358
XLOC_062610	ENSGALT00000034164	17	-	241984	242302	241043	241215	242782	242853	2104	7	0	21	2	368	64	0.577708	1	1	0.646	0.354
XLOC_062610	ENSGALT00000034164	17	-	241984	242099	241040	241215	242782	242853	2106	7	0	18	2	165	64	0.573571	1	1	0.777	0.223
XLOC_062610	ENSGALT00000034164	17	-	242782	242853	241984	242099	242939	243085	2103	1	0	4	2	128	73	0.697374	1	1	0.533	0.467
XLOC_062610	ENSGALT00000034164	17	-	243861	243927	242939	243085	244214	244246	2101	1	0	8	1	70	25	0.956224	1	1	0.741	0.259
XLOC_062610	ENSGALT00000034164	17	-	243861	243927	241043	241215	244214	244246	2102	2	3	2	0	70	25	0.271303	1	0.192	1	-0.808
XLOC_062616	ENSGALT00000034208	17	-	412435	412567	411602	411851	412787	412871	6519	42	2	147	3	191	73	0.93517	1	0.889	0.949	-0.06
XLOC_062618		17	-	441911	442097	441594	441813	442566	442668	7974	5	5	7	1	245	73	0.168818	1	0.23	0.676	-0.446
XLOC_062618		17	-	442874	443002	442566	442668	443161	443328	7975	12	0	18	2	187	73	0.429816	1	1	0.778	0.222
XLOC_062626		17	-	539929	540091	537723	537798	546623	546722	7929	6	12	29	32	216	68	0.662946	1	0.136	0.222	-0.086
XLOC_062407	ENSGALT00000014657	17	+	550725	550777	550446	550548	551592	551753	8194	162	0	463	4	90	73	1	1	1	0.989	0.011
XLOC_062633	ENSGALT00000014570	17	-	683534	683915	665321	665415	757496	757628	7523	7	3	1	18	440	73	0.0131776	0.382037	0.279	0.009	0.27
XLOC_062633	ENSGALT00000014570	17	-	683534	683903	665321	665415	757496	757628	7524	9	3	1	18	428	73	0.0023847	0.131818	0.338	0.009	0.329
XLOC_062633	ENSGALT00000014570	17	-	807189	807243	806564	806704	816515	816683	7521	15	0	17	1	94	73	0.984959	1	1	0.93	0.07
XLOC_062633	ENSGALT00000014570	17	-	818972	819069	817955	818126	822236	822301	7519	1	1	1	1	141	58	1	1	0.291	0.291	0
XLOC_062633	ENSGALT00000014570	17	-	818972	819069	817955	818123	822236	822301	7520	1	2	0	6	141	58	0.530502	1	0.171	0	0.171
XLOC_062633	ENSGALT00000014570	17	-	822236	822301	817955	818123	845510	845623	7522	5	2	16	0	116	73	0.111849	1	0.611	1	-0.389
XLOC_062412	ENSGALT00000014501	17	+	957511	957881	956671	956793	958570	959276	5936	0	4	4	2	429	73	0.113204	1	0	0.254	-0.254
XLOC_062412	ENSGALT00000014501	17	+	958570	958791	956671	956793	959168	959276	5932	13	1	25	1	280	73	0.892488	1	0.772	0.867	-0.095
XLOC_062412	ENSGALT00000014501	17	+	958570	959012	956671	956793	959168	959387	5933	11	1	20	1	501	73	0.861216	1	0.616	0.745	-0.129
XLOC_062640	ENSGALT00000014440	17	-	1068415	1068493	1063524	1063626	1075803	1075860	2769	7	1	11	2	119	50	1	1	0.746	0.698	0.048
XLOC_062640	ENSGALT00000014440	17	-	1075803	1075860	1068415	1068493	1076932	1077013	2767	14	0	16	1	98	71	0.918583	1	1	0.921	0.079
XLOC_062640	ENSGALT00000014440	17	-	1080331	1080520	1076932	1077013	1088096	1088186	2770	72	8	53	3	248	73	0.604431	1	0.726	0.839	-0.113
XLOC_062640	ENSGALT00000014440	17	-	1080331	1085880	1076932	1077013	1088096	1088186	2772	628	8	286	3	5608	73	1	1	0.505	0.554	-0.049
XLOC_062640	ENSGALT00000014440	17	-	1080331	1080490	1076932	1077013	1088096	1088186	2773	60	8	54	3	218	73	0.421407	1	0.715	0.858	-0.143
XLOC_062640	ENSGALT00000014440	17	-	1090000	1090036	1089166	1089244	1091396	1091486	2776	2	9	4	13	56	71	0.983819	1	0.22	0.281	-0.061
XLOC_062640	ENSGALT00000014440	17	-	1107061	1107100	1091396	1091486	1114874	1114952	2768	3	6	15	8	62	71	0.197221	1	0.364	0.682	-0.318
XLOC_062640	ENSGALT00000014440	17	-	1117526	1117622	1114874	1114952	1121120	1121377	2775	7	19	8	25	153	71	1	1	0.146	0.129	0.017
XLOC_062648		17	-	1488748	1488822	1484125	1484278	1501298	1501320	12684	10	0	74	6	76	15	0.486811	1	1	0.709	0.291
XLOC_062422	ENSGALT00000014359	17	+	1523395	1523488	1522896	1523049	1523778	1523889	9030	51	2	72	4	152	73	1	1	0.925	0.896	0.029
XLOC_062423	ENSGALT00000014314	17	+	1556088	1556162	1555904	1556003	1556289	1556388	10347	967	2	1555	9	134	73	1	1	0.996	0.989	0.007
XLOC_062423	ENSGALT00000014314	17	+	1556289	1556388	1556088	1556162	1556876	1556958	10346	1139	0	1921	1	152	67	1	1	1	0.999	0.001
XLOC_062428		17	+	1694452	1694537	1689657	1689768	1698738	1698842	8244	17	0	77	3	146	73	0.936162	1	1	0.928	0.072
XLOC_062429	ENSGALT00000014129	17	+	1725265	1725327	1717657	1717810	1734094	1734574	9252	8	0	21	2	110	73	0.683545	1	1	0.875	0.125
XLOC_062429	ENSGALT00000014129	17	+	1741089	1741158	1738428	1738504	1744909	1744962	9253	0	1	1	11	93	42	1	1	0	0.039	-0.039
XLOC_062433	ENSGALT00000014039	17	+	1834929	1835067	1826167	1826301	1839263	1839366	11747	12	0	43	2	197	73	0.785323	1	1	0.888	0.112
XLOC_062657		17	-	1890392	1890543	1889503	1889663	1891939	1892057	1605	29	1	27	0	210	73	0.844016	1	0.91	1	-0.09
XLOC_062440	ENSGALT00000040177	17	+	2025625	2025713	1984353	1984386	2032941	2033498	177	145	0	194	4	100	26	0.77158	1	1	0.927	0.073
XLOC_062440	ENSGALT00000040177	17	+	2036015	2036057	2032941	2033498	2042352	2042530	175	28	9	31	5	70	73	0.587567	1	0.764	0.866	-0.102
XLOC_062440	ENSGALT00000040177	17	+	2043770	2043907	2042352	2042530	2044765	2044954	178	181	0	201	1	196	73	1	1	1	0.987	0.013
XLOC_062440	ENSGALT00000040177	17	+	2044765	2044954	2043770	2043907	2045610	2045691	176	184	5	228	9	248	73	1	1	0.915	0.882	0.033
XLOC_062440	ENSGALT00000040177	17	+	2054307	2054451	2051504	2051650	2055974	2056201	179	63	18	75	10	203	73	0.209328	1	0.557	0.73	-0.173
XLOC_062448		17	+	2405316	2405502	2405076	2405157	2405668	2405872	10156	1	0	7	1	245	73	0.925147	1	1	0.676	0.324
XLOC_062662		17	-	2453674	2453749	2453293	2453444	2454240	2454732	3240	4	1	6	0	136	73	0.473184	1	0.682	1	-0.318
XLOC_062667		17	-	2653983	2654256	2649762	2649885	2674037	2674301	9359	51	36	188	42	332	73	0.000782375	0.061189	0.238	0.496	-0.258
XLOC_062667		17	-	2667259	2667679	2664279	2664552	2674037	2674301	9358	17	6	10	19	479	73	0.0381759	0.68655	0.302	0.074	0.228
XLOC_062667		17	-	2679941	2681255	2677922	2678186	2682170	2682763	9354	45	1	142	3	1373	73	1	1	0.705	0.716	-0.011
XLOC_062667		17	-	2681027	2681255	2677922	2678186	2682170	2682763	9355	40	1	98	3	287	73	1	1	0.911	0.893	0.018
XLOC_062667		17	-	2696353	2696458	2682170	2682763	2707201	2707460	9360	0	97	24	208	164	73	1	1	0	0.049	-0.049
XLOC_062672	ENSGALT00000011292	17	-	4520071	4520188	4517704	4518299	4521515	4521783	10128	34	1	99	0	176	73	1	1	0.934	1	-0.066
XLOC_062672	ENSGALT00000011292	17	-	4557715	4557864	4555537	4555700	4559909	4560033	10127	72	0	144	1	208	73	1	1	1	0.981	0.019
XLOC_062472	ENSGALT00000043723	17	+	4783220	4783286	4782990	4783017	4783560	4783729	3276	29	0	93	1	65	20	1	1	1	0.966	0.034
XLOC_062476		17	+	4792725	4792829	4791946	4792057	4793428	4793577	3145	11	0	4	2	163	73	0.120988	1	1	0.472	0.528
XLOC_062681	ENSGALT00000007972	17	-	4964655	4964726	4953202	4953284	4967283	4967358	5980	48	1	342	0	123	68	1	1	0.964	1	-0.036
XLOC_062681	ENSGALT00000007972	17	-	4965441	4965564	4964655	4964726	4967283	4967354	5981	26	17	29	130	164	55	8.46685e-05	0.0111663	0.339	0.07	0.269
XLOC_062486		17	+	4987923	4987998	4987734	4987854	4988151	4988213	1321	14	0	35	1	118	55	1	1	1	0.942	0.058
XLOC_062487	ENSGALT00000007792	17	+	4997193	4997274	4996737	4996860	4999429	4999564	2619	30	52	48	84	146	73	1	1	0.224	0.222	0.002
XLOC_062487	ENSGALT00000007792	17	+	4997193	4997274	4996737	4996860	5000151	5000195	2620	17	0	27	3	110	37	0.286746	1	1	0.752	0.248
XLOC_062487	ENSGALT00000007792	17	+	4999429	4999564	4996737	4996860	5000151	5000195	2621	70	0	140	3	158	37	0.669273	1	1	0.916	0.084
XLOC_062487	ENSGALT00000007792	17	+	4999429	4999564	4997193	4997274	5000151	5000195	2622	32	1	78	1	158	37	0.955447	1	0.882	0.948	-0.066
XLOC_062487	ENSGALT00000007792	17	+	4999471	4999564	4997193	4997274	5000151	5000195	2624	16	1	37	1	116	37	0.88218	1	0.836	0.922	-0.086
XLOC_062487	ENSGALT00000007792	17	+	5001365	5001446	5000855	5000915	5003184	5003223	2623	11	0	69	1	85	12	1	1	1	0.907	0.093
XLOC_062684	ENSGALT00000007750	17	-	5027264	5027276	5025989	5026160	5028366	5028478	13272	1	0	3	1	10	73	1	1	1	0.956	0.044
[truncated: 4,728 more rows]
