# Supplementary material for: Identification of DNA-Methylated CpG Islands Associated With Gene Silencing in the Adult Body Tissues of the Ogye Chicken Using RNA-Seq and Reduced Representation Bisulfite Sequencing
Source: Front Genet. 2019 Apr 16;10:346. doi: 10.3389/fgene.2019.00346 (PMC6476954; doi:10.3389/fgene.2019.00346)
Supplement: Supplementary file 3 [file Data_Sheet_2.xlsx]

## Sheet: sheet
Data Sheet S2 The results of gene silencing associated DNA methylations.
CGI information			DNA methylation levels																				Gene information				Gene expression values(FPKM)
chrom	start	end	brisket	liver	bone_marrow	fascia	cerebrum	gizzard	immatured_egg	cockscomb	spleen	matured_egg	cerebellum	gallbladder	kidney	heart	uterus	pancreas	lung	skin	eye	shin_skin	chrom	start	end	gene symbol	brisket	liver	bone_marrow	fascia	cerebrum	gizzard	immatured_egg	cockscomb	spleen	matured_egg	cerebellum	gallbladder	kidney	heart	uterus	pancreas	lung	skin	eye	shin_skin	Rvalue	Pvalue
chr1	105933	106965	0.0304414	0	0.03663	0.0286041	0.019305	0	0.0321285	0	0.111857	0.0493166	0.0510204	0.0205592	0.10995	0.0338238	0.0772059	0.0765931	0.0452716	0.120664	0.0696201	0.0307125	chr1	104371	106371	RABL2B	0.292693	0.696841	0.492493	0.423539	2.66343	0.597302	0.863338	0.670564	0.764229	0.318217	2.46328	0.723421	0.334946	0.997221	1.11676	0.302048	1.17346	0.702516	0.990679	0.663845	-0.105496	0.658018
chr1	105933	106965	0.0304414	0	0.03663	0.0286041	0.019305	0	0.0321285	0	0.111857	0.0493166	0.0510204	0.0205592	0.10995	0.0338238	0.0772059	0.0765931	0.0452716	0.120664	0.0696201	0.0307125	chr1	104371	106371	ENSGALG00000023986	0.123133	0.151295	0.0783963	0.147591	0	0.204924	0.114193	0.206156	0.283713	0.069374	0.358737	0.161408	0.110415	0.137363	0	1.16338	0.234106	0.217187	0.0623518	0.13199	0.211029	0.371803
chr1	428581	430155	39.785	34.7191	43.017	23.5294	50.6121	33.9143	50.1117	55.8836	30.8349	41.6667	52.0407	36.3774	21.7089	50.375	16.2432	26.2626	47.4488	37.4306	41.7808	43.3908	chr1	427083	429083	GCC1	3.26755	5.39554	5.39541	3.53627	3.54911	3.13277	4.70483	3.08722	5.02724	2.42528	3.56616	3.52502	3.22009	3.9823	4.69747	3.80321	4.83016	3.0851	4.08076	1.81786	-0.103009	0.665623
chr1	455112	461449	10.8696	14.5976	0.881643	3.627	15.7374	22.5534	6.9585	9.60493	9.90383	13.0319	7.07672	20.9669	21.9753	24.6032	2.2537	14.0625	0.12987	16.8367	9.66184	13.2143	chr1	458365	460365	PPP6R2	73.4872	19.2513	18.5703	26.1191	10.044	14.3269	8.70375	7.66838	19.5857	9.80696	12.2182	15.1671	7.53556	12.9304	11.4356	13.4204	7.14329	12.7692	11.5265	12.1649	-0.0732599	0.758885
chr1	707679	711768	40.3642	27.4431	40.2303	40.2781	41.0834	37.8968	38.7141	34.6641	36.0117	36.9067	40.9605	41.1092	38.0477	33.4102	39.3432	40.0423	36.8689	41.4145	38.6566	35.1843	chr1	708116	710116	STRIP2	1.8927	1.19041	0.643972	0.586337	1.16099	0.111938	10.7229	0.0996407	0.615171	6.3501	1.38088	0.161554	0.954272	7.72987	0.0681584	0.4968	0.456446	0.153243	1.71824	0.260183	-0.15602	0.511274
chr1	848940	849715	0.137931	9.25253	4.7619	7.02326	0.137741	0	0.900901	4.41176	11.9697	9.33333	5.34826	5.47504	5.21739	0.0386997	0.0881834	0.898998	7.69231	12.8205	5.86567	2.28758	chr1	847991	849991	ZC3HC1	3.22062	4.44195	2.35342	4.63944	4.34474	2.96656	6.12016	2.87538	3.43997	2.71254	3.41896	2.68674	3.48506	3.82476	1.712	4.11551	2.07014	2.62778	2.38167	0.807724	-0.104779	0.660207
chr1	1906985	1907624	0.163655	0	0	0.161708	0.120773	0	0	0	0	0.0402901	0.10661	0	0.746269	0	0	0	0	0	0.220858	0.0392773	chr1	1905278	1907278	CHCHD3	197.359	110.173	55.615	144.188	70.4413	132.647	62.2703	74.7406	48.1963	49.5486	81.8149	54.9097	86.6721	644.604	62.9129	60.1598	47.7365	55.7953	80.1894	34.4316	-0.0317461	0.894301
chr1	1906985	1907624	0.163655	0	0	0.161708	0.120773	0	0	0	0	0.0402901	0.10661	0	0.746269	0	0	0	0	0	0.220858	0.0392773	chr1	1905278	1907278	ENSGALG00000026341	2.91469	2.00402	5.68083	2.80435	1.24928	4.57707	1.78701	2.65632	3.0878	3.56554	1.63191	5.76892	2.25582	4.12494	2.10428	3.71469	1.71398	3.04924	4.69042	3.96518	-0.183527	0.43862
chr1	2987289	2987819	0	0	0	0	0	0	0	0	3.84615	0.416667	0	0	3.33333	3.02198	0	0	0	0.412088	0	3.7037	chr1	2985399	2987399	PODXL	14.9811	2.31483	1.81221	12.4942	3.62603	3.72662	15.6212	5.5224	5.952	35.5165	5.05117	17.924	10.791	28.4677	2.61451	3.3539	20.9949	4.75116	11.0458	5.47051	0.102434	0.667389
chr1	3411355	3411934	0	0	0.0749625	0	0.0265252	0.0397564	0.145243	0.0186254	0.1	0	0.0205128	0	0	0.746269	0	0.1386	0	0.080289	0	0	chr1	3409567	3411567	RBM17	5.26397	6.38219	4.24936	3.76116	5.86512	4.76731	8.1851	4.77171	6.27684	3.88261	5.15617	3.44776	3.48067	6.69749	4.96763	3.27826	4.83887	3.54466	3.31698	2.46854	0.407678	0.0743841
chr1	3979282	3979830	80.5784	71.0431	73.7311	70.4084	77.5227	81.0054	79.9501	77.9739	78.7485	67.0947	78.6251	71.1574	79.4903	59.4433	63.314	70.5765	73.6243	76.5974	75.0682	71.9023	chr1	3978296	3980296	ENSGALG00000006941	0	0	0	0	0	0	0	0	0.100488	0	0	0.117163	0	0	0	0	0	0	0	0	0.0445849	0.85194
chr1	4144181	4144788	0	0	0	0.138889	0	0	0.202429	0	0	0.0150263	0	0.0745157	0	0.0716146	0.162338	0.0574548	0.142248	0	0.0238493	0.0783441	chr1	4142465	4144465	ATP5C1	123.724	192.486	34.7736	104.584	61.8681	70.7311	81.6603	49.4072	40.8456	41.7889	62.4066	47.0144	89.325	379.566	52.7597	53.2825	24.2893	43.7538	54.7829	37.0927	0.0211696	0.92941
chr1	6030550	6031382	0.108364	0	0	0.154553	0	0	0	0.609756	0	0.0771605	0.363108	0	0	0.03663	0.078125	0	0.118064	0	0.066667	0.03003	chr1	6028819	6030819	ECHDC3	29.5426	77.7463	5.02694	21.9305	2.94226	16.4338	14.9292	4.97232	13.4414	11.5935	3.13582	10.572	47.0181	61.9881	32.9549	113.064	7.79678	8.22561	8.24889	4.84201	-0.269095	0.251275
chr1	6052994	6053785	0.10352	0	0.294505	0.15625	1.02504	0.163399	0.040016	0	0.221239	0	1.17319	0.216039	0.149232	0.280311	0.177134	0.152013	0.105263	0.232334	2.92556	0.0688705	chr1	6051191	6053191	PROSER2	10.5763	13.4003	0.286724	6.17154	0.936435	2.14308	3.68535	7.31497	1.89711	5.49667	1.33958	8.05265	9.70718	8.77997	8.52771	3.2871	4.16372	4.25493	4.16255	7.07444	-0.312603	0.179625
chr1	6167260	6167834	0	0	0	0.819672	0	0	0	2.27273	0	0	0	0	0	0	0	0	0	0	0	0	chr1	6165336	6167336	SEC61A2	34.2776	9.84823	2.18098	15.8256	15.1944	4.15175	13.1931	4.683	3.12024	16.5387	19.7286	4.95515	1.96537	12.7738	5.211	2.64388	2.92969	5.68484	9.97203	7.1763	-0.0752901	0.752401
chr1	6167260	6167834	0	0	0	0.819672	0	0	0	2.27273	0	0	0	0	0	0	0	0	0	0	0	0	chr1	6165336	6167336	NUDT5	1.11291	560.579	4.02651	2.00261	1.29842	4.37595	4.52395	3.17155	3.75822	5.27668	2.05762	11.787	5.56058	2.55966	6.50874	10.6158	2.26517	2.99611	2.54579	3.30884	-0.0717994	0.763559
chr1	6195269	6195773	0.0346861	0.0324675	0.0355492	0.107759	0.0251699	0	0.0450755	0	0	0.123666	0	0.0754148	0.0222222	0	0.0237192	0.0478927	0.0549451	0.0370782	0.198712	0.15015	chr1	6193404	6195404	CDC123	8.01363	28.7418	5.21653	6.25089	16.4236	5.38288	10.4916	10.283	8.37944	5.73387	15.3527	5.85947	6.08648	6.53409	8.35011	5.70607	3.61426	5.0245	6.25371	8.09698	-0.227833	0.334004
chr1	7156502	7156929	9.76191	10.6667	31.9444	13.5848	13.058	4.86111	3.53832	11.9792	9.42982	5.47464	5.98039	24.8843	29.1667	11.9918	10.4167	15.1425	28.3333	12.5	14.2047	16.6171	chr1	7155686	7157686	FAM107B	3.039	11.4303	28.9522	4.84532	2.03707	6.40024	4.35795	8.56081	34.3296	3.12616	1.39468	11.1757	2.51502	5.04432	37.5385	2.57948	6.36695	7.66461	4.91299	9.56003	0.141291	0.552391
chr1	7305615	7306171	0.0388957	0.127551	0.04914	0	0.155557	0	0.0407331	0	0.19802	0.0249875	0.0343007	0.0164609	0.0484256	0.0658417	0.0188324	0.0327139	0.0660232	0.0134953	0.0153563	0.125775	chr1	7303880	7305880	HSPA14	8.55281	4.98373	3.58518	5.04613	4.27563	3.80353	7.25719	5.25646	5.77614	3.44095	3.94268	3.28854	2.57076	3.84166	3.79712	2.61954	2.93819	3.6634	3.07771	5.60177	0.229458	0.330474
chr1	7338696	7339103	0.025	0.0725689	0	0.155843	0.0740741	0	0.200321	0.181159	0	0.0221043	0	0.0576384	0	0.0182017	0	0.0714286	0.08	0	0.107527	0	chr1	7337035	7339035	MEIG1	0	0.0949909	0	0	0.309907	0	0.903557	0	0	0.0646741	0.193373	0	0.101321	0	0.927206	0.493831	0.679909	0	0.110972	0	0.284115	0.224748
chr1	8176844	8177539	0.665938	2.18038	5.04274	1.59404	4.4557	2.56752	2.32116	7.59494	3.98214	1.00592	0.955671	0.553948	4.92749	1.53871	0.990676	0.210546	1.31676	1.88095	2.81314	2.27196	chr1	8175103	8177103	SEMA3D	2.60962	0.420787	4.04302	20.3402	4.83798	2.58004	2.11691	3.56305	7.89074	6.12907	4.24344	9.50495	2.61729	4.23504	0.721047	0.833314	4.20192	22.27	7.14171	8.19536	-0.09848	0.679559
chr1	10043747	10045330	0.170721	1.74492	0.849673	0.194769	0.215882	0.675676	0.0908678	5.49828	2.35684	0.501534	1.80225	1.2349	0	0.734692	0.363095	0.999503	0.28169	4.22374	0.714428	2.84483	chr1	10042459	10044459	CACNA2D1	52.7683	1.04756	1.06109	17.6099	30.8264	11.101	4.16395	2.66298	4.14558	7.34456	33.2972	4.91207	4.86448	18.1179	2.51608	1.25879	1.57614	6.73968	13.5362	4.40806	-0.251356	0.285069
chr1	12312987	12314965	0.152207	0.254002	0	0	0.116279	0.132979	4.8	0	0	0.0681311	1.03725	0	0	0.0284091	1.62037	2.35294	0.123457	0	0.0205679	0.077282	chr1	12312477	12314477	TMEM60	13.2047	14.5023	6.06999	10.8767	7.36019	7.96757	12.7573	7.08853	9.19242	5.25679	7.66948	5.07691	6.6846	11.2383	20.5465	5.88617	4.68685	8.93491	7.44347	8.54241	0.325051	0.161997
chr1	12486635	12487459	0	0.0242954	0.119048	0	0	0	0.0477783	0.843882	0	0.277008	0.117925	0.0711238	0	0	0	0	0	0	0	0.113379	chr1	12484893	12486893	GSAP	2.32756	9.66653	5.07234	2.68898	3.32334	2.43443	4.0612	1.47368	7.86304	3.25406	3.37205	5.17367	2.51022	5.49622	4.78378	6.53506	6.50835	2.3354	2.8826	2.24583	-0.326663	0.159804
chr1	12486635	12487459	0	0.0242954	0.119048	0	0	0	0.0477783	0.843882	0	0.277008	0.117925	0.0711238	0	0	0	0	0	0	0	0.113379	chr1	12484893	12486893	ENSGALG00000028239	1.46125	1.76238	1.12095	0.46112	0.646432	0.34564	0.365362	0.356137	1.54494	0.723016	0.952212	0.635838	0.538629	1.61996	2.45676	0.615683	1.01106	0.510159	0.955425	0.869447	-0.280008	0.231811
chr1	12606704	12607793	0	0.0467391	0	0.834202	0	0	0.260417	0	0	0	0	0.925926	0	0	0	0	0	0	0	0	chr1	12605289	12607289	FAM185A	12.2075	4.14211	1.51946	8.06692	2.41225	4.56754	4.70297	3.55086	2.55445	6.30182	2.49088	4.30833	1.94671	6.86838	9.31724	2.31208	4.66032	5.39722	2.74392	7.12525	0.14577	0.539731
chr1	12606704	12607793	0	0.0467391	0	0.834202	0	0	0.260417	0	0	0	0	0.925926	0	0	0	0	0	0	0	0	chr1	12605289	12607289	P37NB	0.360986	0.636387	0.761453	1.90186	0.788737	0.806088	31.9846	1.44548	0.330825	35.0202	0.558863	6.63878	0.0418841	20.5324	0.363953	0.0504165	0.334005	9.05901	4.07587	2.33789	0.0710167	0.766068
chr1	12606704	12607793	0	0.0467391	0	0.834202	0	0	0.260417	0	0	0	0	0.925926	0	0	0	0	0	0	0	0	chr1	12605289	12607289	ENSGALG00000008288	0.913562	1.35611	0.454297	1.18998	0.891436	0.893828	0.931951	1.6021	1.6917	0.983635	0.554734	0.886928	0.573412	0.901563	1.17178	0.507248	0.872849	1.4195	1.06162	3.52085	-0.0565543	0.812795
chr1	12606704	12607793	0	0.0467391	0	0.834202	0	0	0.260417	0	0	0	0	0.925926	0	0	0	0	0	0	0	0	chr1	12605289	12607289	FBXL13	0.0707834	0	0	0.0645748	0.234277	0.0273455	0.0273601	0.0578829	0.056686	0.159694	0.515354	0.0306267	0.0579017	0.087736	2.0856	0	0.246261	0.0332399	0.0856654	0.0985321	-0.1334	0.575011
chr1	12777770	12778493	0.495976	0	0.2331	0	0	0	0.263158	0	0.124069	0	0	0.403226	0.135552	0.0773994	0	0.0923645	0.078125	0	0.0721501	0	chr1	12775876	12777876	PMPCB	25.0665	30.8992	14.3198	16.6646	12.1297	14.2932	20.7835	13.04	17.9776	12.3171	12.1571	14.4859	16.2262	28.9872	18.9969	13.3543	10.5111	8.70927	11.4524	8.20882	0.290249	0.214462
chr1	13572879	13575150	0.0356506	0.157729	0	0.78081	0.0206697	0.262467	0	1.43594	0	0	0.0233437	0.0170707	0.0507014	0	0.0287356	0.0566893	0.0289813	0.0127877	0.0154117	0.21097	chr1	13572915	13574915	KMT2E	20.1956	13.7856	22.9781	10.7021	9.27014	15.135	7.92645	11.6134	30.1047	14.9738	9.6724	21.7169	12.3704	17.9722	24.3805	17.6563	19.5922	17.6019	13.1076	30.4801	-0.256608	0.274784
chr1	13572879	13575150	0.0356506	0.157729	0	0.78081	0.0206697	0.262467	0	1.43594	0	0	0.0233437	0.0170707	0.0507014	0	0.0287356	0.0566893	0.0289813	0.0127877	0.0154117	0.21097	chr1	13572915	13574915	SRPK2	3.95913	3.90585	6.93146	3.06853	14.5256	6.11968	5.77093	5.18104	7.47768	7.777	14.3471	4.61036	3.01583	5.11448	5.22653	3.70918	3.74365	5.2954	5.81966	12.2019	-0.165413	0.48584
chr1	14180463	14181243	0	0.382775	2.22222	0	0	0	0	0	1.3924	0	0	0	0	0	0	0	0	1.38889	0	0	chr1	14178470	14180470	CCDC71L	4.34443	21.5741	17.0548	11.7009	6.23281	7.46917	58.1539	20.5331	10.4369	14.9174	6.22399	10.7324	20.7088	5.46286	23.7791	13.6997	4.89985	10.8505	10.5898	3.09979	-0.00215729	0.992798
chr1	14915618	14917331	1.26812	0.0771605	0.208333	0.0801282	0	0	0.0816994	0	0	0.257732	0.219298	0.413223	0	0	0	0	0	0	0	0	chr1	14914516	14916516	SLC2A13	2.65725	7.65669	1.96007	3.07618	32.2892	10.9718	3.95285	3.42553	5.0971	5.1607	31.5234	4.74273	7.28308	2.47609	4.94656	3.40295	2.79246	4.32638	2.96932	6.37967	-0.0837344	0.725606
chr1	15079491	15081199	32.2785	1.42163	8.62628	25.8939	23.3859	28.0244	29.8117	30.3698	4.03686	22.9887	24.5136	30.4309	20.336	8.9989	32.2569	35.1733	10.3834	17.9871	29.9808	19.268	chr1	15078339	15080339	ABCD2	9.91848	49.0835	7.99251	9.89985	9.27466	5.75872	5.94123	5.34879	16.5845	9.15147	11.6215	18.6643	3.01946	31.0777	9.57934	6.06258	5.43837	9.82652	11.4146	5.51281	-0.556601	0.0108056
chr1	15149052	15150638	7.63001	8.13024	30.2497	12.2158	15.4658	7.59875	5.23183	18.8498	10.588	0.36635	12.5604	11.2287	18.2807	12.114	13.6455	11.3314	12.612	12.2853	9.58919	26.8333	chr1	15147869	15149869	KIF21A	16.9778	28.9107	1.27019	6.62232	53.2971	6.12375	3.72242	7.30923	1.63073	1.88988	44.0868	5.36606	10.5748	19.8722	22.5172	11.4518	3.91888	8.43403	19.3734	10.1133	-0.00795827	0.973436
chr1	15305513	15306679	0.593931	0.105296	1.05995	0.621562	0.0423908	0.400801	0.0315704	0.912202	0.933415	0.372308	0.232091	0.0740741	0.193022	0.0713315	0.0740168	0.10533	0.0693055	1.50682	0.510204	0.806452	chr1	15303621	15305621	CPNE8	2.25323	15.1916	1.25326	3.48955	7.15504	4.93219	2.10775	10.1181	6.6264	1.89554	9.28676	8.49893	3.41735	6.0487	1.81069	2.90935	4.86046	8.51462	5.86557	17.4587	0.157252	0.507902
chr1	15997294	15997957	0	0	0	0	0	0	0	0	0	0.135135	0	0	0	0	0	0	0	0	0.19929	0.117509	chr1	15995491	15997491	TBC1D22A	9.43388	9.03811	3.45334	4.92741	6.71145	4.37962	4.55373	6.1266	5.61013	5.00189	6.18529	4.78827	2.81365	7.62687	2.85084	2.32759	4.19723	5.63672	3.81589	8.41674	-0.00571401	0.980926
chr1	18607539	18609090	0.0735294	0.12585	0.0405844	0	0	0.0355114	0.0544662	0.0152905	0.708617	0	0.0819001	0.462963	0.120192	0	0.0821058	0.0566893	0.109649	0.0600326	0.657895	0	chr1	18606980	18608980	ZBED4	15.4253	5.43358	5.80054	6.77819	2.33723	2.53365	5.40054	4.13768	6.83978	4.29158	2.58889	3.94754	3.10331	4.69075	4.89977	2.21021	2.9297	3.46811	3.40794	5.03416	0.0231514	0.92282
chr1	18656371	18658317	0.029935	0.132163	0.0510696	0.0423729	0.0659178	0	0.00777001	0	0	0.0291971	0.014881	0.0729569	0.0163319	0.0413761	0	0.0618957	0.0277778	0.0421407	0.0176616	0.0221043	chr1	18655757	18657757	CRELD2	3.07308	40.8258	8.19059	13.6683	6.46534	5.12767	20.8371	6.76063	10.9812	14.0203	7.65375	19.6787	5.49945	6.84199	19.8875	9.28467	6.07651	9.26862	3.93951	10.6912	0.583155	0.00695903
chr1	19992726	19993765	29.964	33.8903	42.7243	32.3347	37.0412	39.6433	34.9744	40.8734	51.0377	33.1393	32.0162	35.0442	23.4914	32.3231	36.3882	34.1367	39.1959	29.9358	50.2358	46.9456	chr1	19991998	19993998	TRABD	5.11002	6.77101	3.26064	3.22562	1.91797	2.40251	4.49641	4.36356	4.28035	3.38723	1.64813	3.83865	1.60185	2.34798	2.35392	5.99064	2.6406	2.89424	2.30486	4.63729	0.10033	0.673855
chr1	20070288	20072115	0.0143021	4.37341	4.28571	0.0512821	0.0295159	2.80374	0	4.71491	4.57162	1.8089	0.624278	6.19391	0	2.42074	0	0.767682	0.105042	13.7302	0.385108	8.6669	chr1	20069620	20071620	SELO	31.1215	20.676	7.75143	11.8098	4.74888	5.63252	6.377	7.54586	6.9798	3.50854	4.27784	3.06822	9.1104	9.13836	9.50446	7.06838	12.8702	4.75909	4.95517	8.59383	-0.204257	0.387693
chr1	20644224	20645951	4.29798	3.72588	2.95263	2.11901	1.15156	0.933417	2.36153	5.24592	4.50182	2.99989	0.801169	5.15411	1.93333	4.82951	0.763182	1.25466	3.1159	3.69475	3.30337	4.52623	chr1	20642894	20644894	ZNF800	2.02732	1.98427	0.545316	1.16166	1.30823	0.612984	0.671504	0.252549	1.40226	0.45315	1.42774	1.10097	0.727715	1.2816	1.75344	1.6057	0.736266	0.329122	0.839161	0.406861	-0.177348	0.454449
chr1	20693757	20696108	0	2.10634	2.89855	1.12994	9.78261	0	0.905797	0	9.2803	0	0.438597	1.6129	0	0.925926	0	5.43478	10	0	2.8169	0	chr1	20692672	20694672	GRM8	0.024615	0	0.277521	0.0126728	11.9946	0.0190333	0.0120496	0.0400653	0.0317148	0.0130159	9.43794	0.154409	0.0691078	0.0290189	0.0531524	0.136243	0.0414431	0.0438225	8.69296	0.025413	0.308913	0.185093
chr1	21979683	21980973	0	0.861678	8	0	0.428571	0	3.33333	0.438597	6.37151	11.8644	0.645161	1.49254	0.806452	0	0	1.26582	3.93519	0	3.44828	0	chr1	21978226	21980226	WASL	13.0288	4.68185	1.79819	5.01447	4.67145	7.12796	5.76685	5.26975	2.98363	9.98054	4.07317	7.93904	4.06876	9.06168	2.95474	4.38131	3.81053	5.82877	9.20998	9.44894	-0.0581342	0.807657
chr1	21979683	21980973	0	0.861678	8	0	0.428571	0	3.33333	0.438597	6.37151	11.8644	0.645161	1.49254	0.806452	0	0	1.26582	3.93519	0	3.44828	0	chr1	21978226	21980226	LMOD2	0.0365477	0	0.0475859	0.291366	0	0	0	0.010093	0.00821031	0.0383511	0	0	0	83.1753	0	0.139494	0.010291	2.9176	6.15087	0.0685593	-0.155585	0.512467
chr1	21979683	21980973	0	0.861678	8	0	0.428571	0	3.33333	0.438597	6.37151	11.8644	0.645161	1.49254	0.806452	0	0	1.26582	3.93519	0	3.44828	0	chr1	21978226	21980226	ASB15	30.1592	0.0454872	0	16.1753	0.0297344	0	0.019886	0	0.00434587	0	0.0192583	0	0.0311905	10.5302	0.0206207	0.0158683	0.0187259	0.124611	1.10122	0	-0.257667	0.272739
chr1	22603382	22611731	8.44371	9.17498	12.1046	12.9872	23.9849	6.85251	9.08542	16.7651	14.3645	8.87849	21.3751	14.9263	7.89698	14.8318	6.57698	13.6721	10.4455	16.4403	14.0284	11.9387	chr1	22606522	22608522	FEZF1	0	0	0	0	0	0	0	0	0	0	0	0.0632075	0	0	0	0.260211	0	0	0.22439	0	0.101573	0.670033
chr1	22637788	22638904	3.96792	1.87922	9.97952	2.82103	5.89012	3.70536	1.71463	10.2508	6.40867	1.89375	4.83968	5.08612	3.30887	1.41541	5.01475	1.78867	4.28734	4.14809	5.56647	11.4308	chr1	22636412	22638412	AASS	12.2554	37.4032	1.08446	9.54759	4.77335	1.99425	6.21789	4.31875	4.9596	6.00333	5.54888	4.64747	3.06518	45.7794	13.8384	17.0087	20.7953	5.14589	6.43479	4.59852	-0.48201	0.0313849
chr1	24324455	24325490	1.49425	2.69444	1.34503	5.26316	0.746269	1.83371	1.12387	3.84715	2.803	0	2.83019	4.11765	4.42304	0	32.0377	8.64583	0.515464	7.6087	6.15385	4.36893	chr1	24322712	24324712	ENSGALG00000029113	0.133122	0	0.0694553	0.345533	0.0739649	0.0283425	0.306119	0.175221	0.0560839	0.218807	0.0269818	0.327923	0.0388312	0.101575	0.695765	0	0.109012	1.86924	0.443166	0.775518	0.371316	0.106986
chr1	24324455	24325490	1.49425	2.69444	1.34503	5.26316	0.746269	1.83371	1.12387	3.84715	2.803	0	2.83019	4.11765	4.42304	0	32.0377	8.64583	0.515464	7.6087	6.15385	4.36893	chr1	24322712	24324712	CFTR	0.696364	0.128493	0.0330962	2.74617	0.177434	0.853803	0.690119	0.318059	0.265372	0.541772	0.268919	7.29583	0.387382	0.386987	10.5423	0.860583	0.816445	0.575249	0.415923	0.400302	0.787711	3.73643e-05
chr1	26613566	26615493	9.375	9.69186	48.2639	8.53333	8.57143	28.75	15.5164	32.8947	14.0062	23.756	11.7925	18.1818	27.027	0	17.2619	13.8667	23.5849	3.94737	10.1279	27.5	chr1	26612545	26614545	GPR85	0.234937	0.17901	0.0820263	0.419581	40.7668	0.278383	0.268487	0.17829	0.490118	0.656167	30.9755	0.512134	1.85727	0.540571	1.65597	0.499217	0.387603	0.786724	11.6598	0.519842	-0.263414	0.261805
chr1	26741871	26742894	0	0	0	0	0	0	0	0	0.248447	0	0	0	0	0	0	0	0	0	0	0	chr1	26740014	26742014	TMEM168	8.0139	10.5336	5.36396	4.43744	3.50696	6.83767	5.86335	9.42369	11.6354	3.76781	3.27886	5.86656	3.36183	5.6056	4.86136	3.5244	5.35369	6.52819	4.16263	9.29007	0.522891	0.0180014
chr1	26959574	26961122	0	0.0350508	0.163934	0	0.121766	1.0452	0.0610128	0.153846	2.0201	0	0	0	0	0	0	0	2.61194	0.252525	0	1.88679	chr1	26958165	26960165	DOCK4	6.30432	2.62622	2.12431	3.06599	16.8427	2.54958	4.24084	3.46044	7.10631	7.95991	19.3218	5.84757	0.790326	6.92195	2.27454	0.854818	3.63105	5.5875	6.17383	4.19101	-0.105028	0.659445
chr1	28391880	28393222	2.5	0	0	0.113636	0	0.833333	0	0	0	0.0925926	0	0	0	0	0	0	0	0	0.0661376	0.110865	chr1	28390694	28392694	THAP5	11.7544	9.61238	7.69694	8.35676	7.21075	3.59359	13.0628	7.32731	9.50413	6.2156	6.53484	4.96693	3.59962	18.3288	4.20599	2.54403	5.68954	4.87607	5.14518	7.38812	0.186615	0.43082
chr1	28472021	28472935	0	0	0	0	0	0	0.295858	0	0	0	0.271003	0	0	0	0	0	0.37594	0	0.328947	0	chr1	28470304	28472304	PNPLA8	30.9753	12.1157	7.71992	11.8276	15.0241	8.64663	7.52506	17.075	8.53063	6.72466	14.2296	8.27249	8.84464	69.0884	13.0014	5.55277	14.0562	10.2383	9.00523	16.3854	-0.126527	0.595032
chr1	28524775	28526287	6.12245	0.882421	9.09091	0.649351	0	0.438597	0.931174	8.73016	0.909091	9.375	0	2.54237	9.09091	0	0.833333	0	4.54545	1.38889	0	4.08163	chr1	28523496	28525496	NRCAM	0.302437	0.0444439	0.00445396	0.516224	35.5107	0.390882	0.148999	7.49291	0.312306	0.046516	32.2809	0.465823	0.556373	0.211049	19.7277	1.87119	0.119507	3.19036	8.61425	9.22983	-0.313565	0.178219
chr1	28703319	28704570	0.102366	5.03506	1.97085	0.307863	0.397085	0.454312	0.333712	1.58282	2.31246	0.514467	0.265663	1.68875	1.13936	1.18977	0.249005	0.214188	1.74265	2.45429	2.46812	0.181804	chr1	28701793	28703793	CNTN1	0.957565	0.309924	2.43281	4.2887	84.813	2.41302	0.780646	33.2887	2.96577	0.801635	77.3577	5.4198	1.46435	1.95047	0.601187	0.846645	3.44639	22.0272	18.5252	17.6154	-0.176809	0.455845
chr1	30055929	30057031	3.51482	1.78571	1.30507	3.01757	0.324074	0	1.00893	5.11727	2.32068	0.796388	2.64239	5.16127	5.50115	0.9279	2.41758	3.70014	6.20408	1.09351	1.97865	1.40678	chr1	30054690	30056690	TMEM117	31.8363	0.380122	0	7.05798	3.80935	1.59347	6.10648	0.427644	0.0221047	0.971423	2.27286	0.253475	0.0360587	4.08094	0.0293343	0.12923	2.04194	0.587991	1.84596	0.349475	0.0542941	0.820157
chr1	30055929	30057031	3.51482	1.78571	1.30507	3.01757	0.324074	0	1.00893	5.11727	2.32068	0.796388	2.64239	5.16127	5.50115	0.9279	2.41758	3.70014	6.20408	1.09351	1.97865	1.40678	chr1	30054690	30056690	ENSGALG00000019367	3.84676	0	0.00565447	0.82918	0.138693	0.0603653	0.176168	0.0371061	0.00415707	0.0597242	0.276229	0.010651	0.00715812	0.149481	0	0	0.489357	0.0540668	0.140346	0.0931567	0.166834	0.482047
chr1	30472318	30473064	3.19679	6.48138	5.08749	7.24111	13.8317	16.7656	8.16109	10.2421	15.1394	4.6089	14.2017	16.7758	11.1464	4.30633	6.50439	4.02722	4.95883	9.10589	15.0649	4.05093	chr1	30470446	30472446	ENSGALG00000009603	0	0	0.135074	0.0410216	0.505289	0	0.175725	0	0	0	0.529203	0.0769634	0	0	0	0	0	0	0	0	0.347186	0.133667
chr1	30691799	30696109	0.0471921	0.380892	0.00958773	0.0106564	0.0573545	0	0.25641	0.0138176	1.9624	0.0589981	0.00452161	0.015397	0.0212585	0.052877	0.00888415	0.0437507	0	0.00576701	0.0138121	2.36562	chr1	30692885	30694885	ARID2	6.42309	8.3895	9.36559	4.4919	4.43079	6.17729	6.43093	6.61889	11.329	6.63575	4.34956	6.16578	4.70011	6.93103	10.9022	5.39734	6.37901	6.18168	6.40124	10.0092	0.626473	0.00312163
chr1	30691799	30696109	0.0471921	0.380892	0.00958773	0.0106564	0.0573545	0	0.25641	0.0138176	1.9624	0.0589981	0.00452161	0.015397	0.0212585	0.052877	0.00888415	0.0437507	0	0.00576701	0.0138121	2.36562	chr1	30692885	30694885	ARID2	6.53359	4.60634	11.6258	1.8924	1.94388	5.29307	1.90545	3.04719	5.29715	3.6728	1.65834	3.34933	3.58214	2.4766	5.64007	3.81458	6.47167	4.15348	3.02342	6.15691	0.192035	0.417308
chr1	31383898	31384785	0	0	0	0	0	0	0	0	0	1.08696	0	0	0	0	0	0	0	0.584795	0.0784929	0.0938086	chr1	31382445	31384445	XRCC6BP1	19.6934	33.1819	8.06914	17.5479	6.52993	11.4758	17.8746	9.62915	10.4308	9.88035	7.71164	5.88893	12.2845	18.3164	10.4576	8.32186	7.10842	8.19474	7.27606	5.85948	-0.149868	0.528267
chr1	33355601	33356085	0	0	0.462963	0.0936448	0.182648	0	0.104167	0	0	0.0452899	0	0.122325	0	0	0	0	0	0	0.0810234	0.0651744	chr1	33353624	33355624	TMEM5	3.66979	2.1284	0.622217	2.50012	2.96279	1.27602	0.92143	1.51965	0.823341	0.872693	2.49251	1.26203	0.819029	1.89999	0.711773	1.96598	0.831819	1.39089	1.44533	1.9986	-0.14821	0.532892
chr1	33675389	33676625	0.979736	0.278245	2.47748	0.918605	4.19452	0.156187	0.349294	1.12055	1.36934	0.198609	2.09488	1.51632	2.3117	0.548817	0.391865	0.646567	0.62264	2.76268	0.840729	2.75298	chr1	33674051	33676051	RASSF3	15.2719	32.0788	6.48164	12.7091	5.18853	23.2498	22.1616	13.714	13.0463	33.6181	4.12813	21.5451	14.6353	42.4185	58.2891	40.6584	63.8998	15.1742	8.391	14.9534	-0.591156	0.00605096
chr1	33945795	33947350	3.08826	2.15296	8.86568	1.49912	4.61174	2.14517	1.00153	6.04475	4.02303	2.10221	2.16912	12.488	3.91673	2.96889	1.32565	1.91707	2.90485	12.0358	9.161	2.71465	chr1	33945553	33947553	MSRB3	40.8752	11.9238	3.28714	20.206	3.35606	61.2288	13.5663	12.7447	7.46876	23.3196	3.88638	7.38679	5.73534	89.2855	10.573	1.2131	18.4008	32.3098	10.9297	22.6145	-0.142134	0.549999
chr1	34858286	34860068	0	0.22992	1.63858	0.392628	0.551023	0.353261	1.12045	9.84252	6.73171	0	0.345528	0.645161	5.05226	0.0938086	1.05263	0	0.561056	0	1.56617	2.01643	chr1	34857638	34859638	DYRK2	15.3123	4.09669	1.93549	6.9359	4.20285	7.15534	4.77813	5.48438	7.69106	7.18557	4.73025	4.46532	3.52155	17.5164	7.05596	3.42935	10.3933	4.45156	5.97744	5.10289	-0.166442	0.483091
chr1	35172125	35173504	0	0	0	0.434783	0	0	0	0	0	0	0	0.980392	0	2.94118	2.54237	0	0	0	0	0	chr1	35170362	35172362	NUP107,RAP1B	19.6981	25.6074	27.5537	19.731	22.8459	16.5504	36.9498	26.1108	30.119	26.3608	19.2237	26.9218	12.1508	19.8114	21.1741	30.89	21.1665	25.8036	12.4953	25.6989	-0.14098	0.553275
chr1	35233887	35235227	0.233465	0.114973	0.175541	0.308847	0.631415	0.0734594	0.034892	0.0503051	0.0697632	0.116713	0.747439	0.0795251	0.263976	0.120438	0.0602992	0.162021	0.0833249	0.112564	0.0856164	0	chr1	35232299	35234299	SLC35E3	8.46945	14.5932	9.53334	11.4801	23.9504	5.96746	21.3987	11.4968	13.9411	13.8509	26.3856	10.4581	5.71766	6.93927	12.7459	8.16355	14.1584	12.0737	7.66802	15.4253	0.561794	0.00994227
chr1	35386485	35388102	1.68269	2.17611	0.0868056	0	0.688366	4.61047	0	4.63529	6.70139	1.5873	0.0218007	0.8726	0.0379417	1.55556	0.0463397	0.0840336	1.17684	0	0.406504	3.68421	chr1	35385340	35387340	GAS41	2.33754	2.83128	2.69425	2.01847	2.33002	1.76872	4.70011	2.12578	3.17066	2.37984	2.1152	1.96303	1.40869	2.76927	12.4528	1.0563	1.7022	2.10326	1.69921	2.16189	-0.129436	0.586524
chr1	35461300	35461946	0.03367	0	0	0.124644	0.0529942	0	0	0	0.251142	0.0145075	0.080848	0.0895666	0.12987	0.0104756	0	0.0169895	0	0.273224	0.0721255	0.0133458	chr1	35459502	35461502	CCT2	37.4794	38.6937	17.2895	28.9965	25.5695	22.537	41.8539	16.3278	20.0357	25.5407	26.7868	24.1198	12.52	32.152	20.6562	22.2958	13.2675	15.3343	16.5757	14.6319	-0.269271	0.250951
chr1	35461300	35461946	0.03367	0	0	0.124644	0.0529942	0	0	0	0.251142	0.0145075	0.080848	0.0895666	0.12987	0.0104756	0	0.0169895	0	0.273224	0.0721255	0.0133458	chr1	35459502	35461502	CCT2	0.334199	0.469613	0.505826	0.390267	0.217499	0.44184	0.503051	0.280159	0.768471	0.5898	0.252878	0.509737	0.252176	0.313662	0.582863	0.301545	0.294687	0.439161	0.290514	0.638995	0.180911	0.445287
chr1	35461300	35461946	0.03367	0	0	0.124644	0.0529942	0	0	0	0.251142	0.0145075	0.080848	0.0895666	0.12987	0.0104756	0	0.0169895	0	0.273224	0.0721255	0.0133458	chr1	35459502	35461502	LRRC10	0.280762	0.297495	0	0	0	0	0.726418	0	0	2.38829	0	0.340502	0	18.9269	0	3.51161	0	0	0	0	-0.18323	0.439375
chr1	35522260	35523459	0	1.58009	0	0.168044	3.0303	0	0.808081	0.284091	0.595238	2.39605	0	0	0	0.297619	0	0	0	6.66667	0.188679	9.01786	chr1	35520548	35522548	ENSGALG00000009959	6.1032	13.6634	0.338233	3.07028	20.0338	4.75788	4.93661	0.782345	0.344799	6.75234	17.4583	2.82297	21.6841	29.2939	48.8101	11.9507	4.28451	0.842386	6.00378	1.20358	-0.223862	0.342726
chr1	36391818	36392513	0	0	0	0.0462963	0	0	0	0	0	0.0357782	0.352113	0	0	0	0	0	0	0	0	0.165003	chr1	36390190	36392190	RAB21,TBC1D15	71.1023	37.7164	23.7011	35.656	35.1463	23.9672	29.6403	31.7546	31.4678	17.5286	31.6679	19.0551	18.0138	42.6762	23.7243	13.602	26.9281	24.2974	19.5896	32.1535	0.0537871	0.82181
chr1	37703959	37704687	24.2424	11.5044	0	15.493	2.43902	6	22.6923	5.55556	2.63158	0	0	0	7.04225	13.7255	0	15.493	0	35.4167	11.6356	10.8696	chr1	37702464	37704464	ENSGALG00000010222	0	0.100978	0	0	0.178944	0	0.0512367	0.180951	0	0	0.0635814	0.0794388	0.0288522	0	0.0336618	0.0545818	0.0201803	0.0416595	0.0314058	0.0302257	-0.126298	0.595707
chr1	38320733	38323849	31.7633	15.0995	14.0688	10.3895	2.69039	36.2905	14.0457	22.4272	28.0608	30.2961	14.7906	27.3084	9.35601	16.5976	15.5205	14.722	17.8196	19.912	22.7418	24.8847	chr1	38319321	38321321	NAV3	2.47679	0.744803	2.97331	3.34414	18.0739	5.23182	6.21861	3.07419	6.68343	16.4897	17.2154	6.51253	0.642384	2.02743	0.217717	0.651929	1.25942	3.86765	3.72304	5.40227	-0.0278922	0.907076
chr1	39927341	39933506	11.8821	15.0926	21.0897	21.2606	19.3267	26.7899	28.188	33.0316	23.4174	31.4394	19.8511	32.6177	24.2027	24.9015	26.9684	17.4824	22.3093	27.7495	23.4448	37.4205	chr1	39929916	39931916	MYF5	0.859653	0	0	0.82606	0	0	0	0.0311191	0.00794001	0	0	0.0284653	0	0	0	0.0330187	0	0.0114694	0.385351	0	-0.4218	0.063966
chr1	41743374	41744788	2.19081	3.90474	6.55317	6.55104	7.22566	2.5641	10.5084	6.64021	13.5378	5.1957	8.88546	5.54033	2.80444	12.0505	5.73641	2.25837	5.71421	5.15131	9.12163	9.13811	chr1	41744096	41746096	ALX1	0.216864	0	0	0.754136	0.106613	0.0796903	7.69476	3.1462	0.00448346	8.5134	0.0632255	0.26772	3.49424	0.0119909	0.124475	0.0149111	0.116132	0.376966	2.61504	1.58392	0.0946584	0.691396
chr1	44273158	44274724	0.0408163	0.0108507	0.0792863	2.42053	0.103186	0.909091	0.0234705	0.735294	0	0.0550162	0.679158	0.0353607	0.443989	0.137794	0.12284	0.0438795	0.0660628	0	0.0613757	0	chr1	44272202	44274202	ENSGALG00000019338	0.661843	0	2.24192	0.372968	0	0	0	0	0.446994	0.437969	0.399228	0.542617	1.19785	1.4722	0.839331	0	0	0.702242	0	0.315947	-0.0954364	0.688981
chr1	45239226	45240426	0	0	0	0.0381243	0.113636	0	0.892857	0.442478	0.0801282	0	0.12987	0.14245	0	0	0	0.231481	0.211864	0	0.20612	0	chr1	45240358	45242358	FGD6	9.31808	9.51089	3.19346	5.18635	2.29317	9.12122	4.25801	11.9634	7.02298	7.53533	2.12602	6.38664	5.12285	43.0819	2.01799	3.46572	5.12552	5.35651	3.73711	7.15414	-0.141293	0.552386
chr1	46488474	46489233	0	0	0	0	0	0	0	0	0	0	0	1.26582	0	0	0	0	0	0	0	0	chr1	46486643	46488643	TMPO	55.0122	12.7329	37.0641	24.359	11.3503	20.5729	26.6106	14.0334	31.4427	14.354	8.72466	17.8218	12.3716	21.7901	34.9781	13.677	18.1798	16.3338	13.6511	23.3578	-0.0755059	0.751712
chr1	46514333	46515713	0	0	0	0.0542594	0	0	2.12766	0	0	0	0	0	0	0	0	0	0	0	0	0.282486	chr1	46512762	46514762	SLC25A3	326.644	382.746	111.495	214.534	153.875	166.98	165.635	168.019	107.884	98.2687	140.447	111.763	191.843	735.641	208.746	360.024	80.3829	103.383	137.508	95.9403	-0.0790799	0.740339
chr1	46514333	46515713	0	0	0	0.0542594	0	0	2.12766	0	0	0	0	0	0	0	0	0	0	0	0	0.282486	chr1	46512762	46514762	SNORA53	13.29	1030.14	65.4301	70.4558	18.1348	230.507	56.4511	146.789	89.3139	19.321	17.9353	35.9148	591.977	217.29	42.2517	31.2939	28.2753	379.345	39.32	156.715	-0.104158	0.662104
chr1	47072191	47072968	0.104167	0.748503	0	0.101112	0	0.0183824	0	0	1.00251	0.10142	0.227273	0.0716846	0.15625	0.0480769	0	0.148741	0	0	0.0367611	0.080781	chr1	47070405	47072405	SCYL2	14.4931	15.8824	4.77518	7.50281	5.86323	7.06799	6.67193	7.41692	9.01501	5.48403	4.92811	6.38356	5.51532	7.74886	10.8184	7.59074	4.4647	6.41044	5.39337	11.379	0.441066	0.0515764
chr1	47195696	47196227	0	0.265151	0	0.0663829	0.189036	0	0	0	1.81953	0.0413475	0.543478	0.0462963	0	0.0426257	0.666667	0.142045	0	0	0.120635	0.833333	chr1	47194102	47196102	GAS2L3	0.230454	0.0744135	1.10172	0.211282	0.0258427	0.254211	1.32185	1.26109	0.447272	0.460895	0.00788497	0.798696	0.0431585	0.182281	0.0922796	0.320619	0.152002	0.716599	0.544982	1.28531	-0.0294866	0.901788
chr1	47570306	47571244	0.735294	0	0.396825	0	0	0	0.0561512	0.0499501	0.0929223	0	0	0	0	0	0	0	0	0.180832	0	0	chr1	47570332	47572332	NUP205	11.2122	17.7927	11.4075	8.97313	4.79182	12.1349	16.2199	13.7327	12.7509	9.92921	4.58163	9.59674	9.74827	12.1707	23.2394	10.0156	7.28517	9.06198	7.73086	12.0647	0.0149744	0.950038
chr1	47632440	47633285	0.0614251	0	0.0408497	0	0.103442	0.106828	0.0750469	0	0.0824916	0.120773	0.0323206	0	0.0474383	0.0490196	0.0501253	0.221802	0.0459559	0.0691569	0	0	chr1	47630980	47632980	CNOT4,ENSGALG00000011717	21.6454	4.78903	3.84789	5.71773	2.75844	3.80845	3.91951	2.69184	4.02064	5.98098	2.34759	5.85386	2.01805	2.87548	3.6144	3.01361	3.78542	3.1502	7.1728	5.31736	-0.0824455	0.729677
chr1	47761331	47763068	0	6.4951	12.234	39.4718	0.0980392	24.1453	3.92157	16.9643	0	28.7454	0	36.6013	10.2273	14.1509	1.06383	17.7778	1.06383	23.6919	15.0908	36.6355	chr1	47760308	47762308	WDR91	10.006	5.24811	10.962	7.20713	9.41052	5.55161	11.3562	8.70954	10.394	4.62771	7.37182	7.69043	7.90613	7.19057	5.05157	8.82301	6.60898	7.52037	6.13933	5.73965	-0.36382	0.114821
chr1	47924268	47936957	4.30786	5.597	5.8917	4.37898	7.87387	4.86819	5.40702	6.56923	5.88848	6.74507	7.39653	8.14578	4.81047	6.11566	2.21983	4.54741	8.29119	2.39141	8.61372	5.78847	chr1	47924833	47926833	ENSGALG00000011747	30.5136	40.5857	117.789	15.2088	9.04039	20.2308	60.9582	98.6453	46.5904	16.5528	10.1249	26.7847	12.8093	15.9846	21.2505	56.9544	21.039	34.4688	16.7625	10.6512	-0.0815415	0.732536
chr1	47924268	47936957	4.30786	5.597	5.8917	4.37898	7.87387	4.86819	5.40702	6.56923	5.88848	6.74507	7.39653	8.14578	4.81047	6.11566	2.21983	4.54741	8.29119	2.39141	8.61372	5.78847	chr1	47924833	47926833	ENSGALG00000011747,HIST1H111L	7.53191	14.9683	93.9304	19.8324	9.93686	28.9975	49.3696	54.7673	39.0377	19.4111	13.8688	24.0617	23.0993	17.9584	40.0915	51.7857	26.0845	35.9237	15.7319	3.61688	-0.211274	0.371235
chr1	47924268	47936957	4.30786	5.597	5.8917	4.37898	7.87387	4.86819	5.40702	6.56923	5.88848	6.74507	7.39653	8.14578	4.81047	6.11566	2.21983	4.54741	8.29119	2.39141	8.61372	5.78847	chr1	47924833	47926833	ENSGALG00000011747	7.8726	73.8866	157.428	37.357	54.6783	73.1565	475.221	308.741	52.6829	12.2836	15.5337	25.8587	92.3011	39.1734	14.287	5.39276	21.6931	101.549	33.3545	9.39134	-0.0483686	0.839525
chr1	47924268	47936957	4.30786	5.597	5.8917	4.37898	7.87387	4.86819	5.40702	6.56923	5.88848	6.74507	7.39653	8.14578	4.81047	6.11566	2.21983	4.54741	8.29119	2.39141	8.61372	5.78847	chr1	47924833	47926833	ENSGALG00000027249	2.86913	6.24726	67.4169	9.07493	0.924263	8.73128	36.4231	36.5255	15.7913	8.5801	1.68393	15.9932	4.27409	6.66847	13.2786	1.9041	4.48386	20.2511	10.3588	2.25694	-0.0611244	0.797955
chr1	48648333	48649379	19.8623	7.55313	13.3537	4.52381	4.71945	3.57041	5.13087	27.5599	14.5079	7.11934	10.487	23.9715	6.59105	5.47672	4.48286	12.5188	14.6754	6.73543	8.13492	17.1021	chr1	48646492	48648492	ATF7IP	13.5981	15.2846	19.9735	8.14391	6.63918	10.6901	7.68701	9.20803	18.2073	10.014	6.53898	12.4794	6.54631	13.3664	11.1784	6.76739	15.6519	12.6324	9.17946	19.3979	0.325317	0.161633
chr1	48648333	48649379	19.8623	7.55313	13.3537	4.52381	4.71945	3.57041	5.13087	27.5599	14.5079	7.11934	10.487	23.9715	6.59105	5.47672	4.48286	12.5188	14.6754	6.73543	8.13492	17.1021	chr1	48646492	48648492	PLBD1	11.9345	28.3519	14.2297	12.7153	0.970357	4.07016	78.1796	38.2354	28.7472	247.533	0.846122	23.5948	17.2895	20.4967	4.33216	3.16775	26.5052	25.5975	12.8754	36.1653	-0.0617983	0.795773
chr1	48916104	48917234	0	0	0.0444444	0.14881	0	0	0	0	0	0	0	0	0	0	0	0	0.0323206	0.0336022	0.0574713	0.208333	chr1	48914532	48916532	UBN2	13.7522	4.77901	8.34894	5.27888	3.47206	6.12961	5.61172	4.90661	6.16802	7.01684	3.78633	5.67738	3.11848	7.1676	5.51085	5.10633	5.03689	6.10281	5.09174	8.76906	0.192593	0.415932
chr1	48916104	48917234	0	0	0.0444444	0.14881	0	0	0	0	0	0	0	0	0	0	0	0	0.0323206	0.0336022	0.0574713	0.208333	chr1	48914532	48916532	UBN2	0	0	11.7973	0	0	0	0	4.62723	2.33693	52.5177	0	3.91451	0	23.8047	0	53.8413	5.68787	1.84602	1.46732	1.67672	-0.177556	0.453913
chr1	48973513	48978171	0.155387	0.156675	1.26388	0.682699	0.279823	0.184317	0.593058	0.488178	0.374449	0.258779	0.0119474	0.469004	0.302681	0.097166	0.0256016	0.109326	0.450502	0.0335879	0.0244579	0	chr1	48975565	48977565	LUC7L2	38.2995	30.9856	31.3115	26.1636	16.4372	22.0455	26.0438	14.3593	33.5284	17.9788	14.3804	21.6291	16.6304	26.8044	25.2646	18.9833	19.6471	17.9618	15.3809	23.3039	0.271749	0.246448
chr1	49039191	49040200	0	0.0558037	0.0388396	0.219298	0.137518	0.0404546	0.0459139	0.0471862	0.149911	0	0.0423052	0.0452044	0.0294985	0.0697715	0.01924	0.0386289	0.02252	0.063136	0	0	chr1	49037798	49039798	POLDIP3	18.0872	15.3411	13.319	12.7383	16.2213	11.9752	16.892	18.1888	22.0512	13.2015	15.1938	11.5469	11.3584	18.7364	32.952	12.265	16.0974	11.7504	14.4455	14.8401	-0.0102862	0.965669
chr1	49039191	49040200	0	0.0558037	0.0388396	0.219298	0.137518	0.0404546	0.0459139	0.0471862	0.149911	0	0.0423052	0.0452044	0.0294985	0.0697715	0.01924	0.0386289	0.02252	0.063136	0	0	chr1	49037365	49039365	U12	0	65.4797	0	137.218	0	67.0967	0	0	297.099	0	0	0	39.5288	0	1794.98	0	0	13.6186	0	0	-0.0260415	0.913218
chr1	49083945	49085938	15.3614	13.5721	22.0836	12.0682	19.1897	33.4569	13.4565	21.6921	12.2351	17.6683	18.8265	16.0129	16.7555	22.5558	24.9184	18.3836	23.175	35.138	16.8849	18.0278	chr1	49082817	49084817	SOCS1B	1.30866	0.889562	2.8281	1.9388	0	1.48719	4.92504	2.10376	10.1154	2.02993	0.0844132	2.37292	1.96378	1.51682	0.375572	0.102281	2.14409	1.99096	0.714945	0.586828	-0.277107	0.236886
chr1	49274202	49284677	1.08098	0.779723	2.249	2.17294	2.23632	0.788104	2.48091	1.61701	1.72354	1.90741	1.61572	1.48716	1.78772	2.05788	3.51709	0.705231	2.25151	1.36692	1.35906	1.89104	chr1	49275066	49277066	SMDT1	40.0022	6.88233	9.10318	27.6124	18.061	12.8573	15.1596	11.3476	11.998	9.19328	19.7591	9.92105	13.1987	43.1068	10.0956	13.3531	9.0117	11.0637	15.3298	7.76636	-0.0274313	0.908605
chr1	49274202	49284677	1.08098	0.779723	2.249	2.17294	2.23632	0.788104	2.48091	1.61701	1.72354	1.90741	1.61572	1.48716	1.78772	2.05788	3.51709	0.705231	2.25151	1.36692	1.35906	1.89104	chr1	49280566	49282566	FAM109B	32.579	10.2908	15.9905	33.7695	3.71076	31.8071	26.4521	21.2453	12.3766	19.7145	2.88826	11.611	14.0664	39.5473	20.2415	12.3763	16.7786	32.6929	13.7287	5.96219	0.0221387	0.926187
chr1	49274202	49284677	1.08098	0.779723	2.249	2.17294	2.23632	0.788104	2.48091	1.61701	1.72354	1.90741	1.61572	1.48716	1.78772	2.05788	3.51709	0.705231	2.25151	1.36692	1.35906	1.89104	chr1	49282425	49284425	NAGA	3.59459	29.7448	17.1522	10.2309	2.73091	12.8596	14.8797	11.072	16.5047	14.6326	3.53222	16.6675	16.2464	8.30628	18.1584	19.798	14.2856	16.7376	8.82131	7.56447	-0.13454	0.571719
chr1	49317556	49318778	0.344537	0.412719	0	0.373626	1.81108	0	0.148148	0	0	0.202298	1.42857	0.118343	0.0833333	0.149492	0.173611	0.0339674	0.119048	1.18243	0.171552	0.189394	chr1	49316309	49318309	CENPM	0.058855	0.304894	7.9206	0.639535	0.0629201	0.0473491	16.1308	1.8331	1.62283	1.18594	0.184365	1.4214	0.290123	0.482778	0.0641769	0.755352	0.92692	0.737683	0.256157	0.409328	-0.203039	0.390591
chr1	49367049	49373397	21.1343	18.7448	23.4881	24.2168	18.6097	14.628	25.9766	16.5291	18.7648	19.7735	18.2427	21.2848	16.5541	22.3412	9.53677	11.5498	24.8889	13.0809	22.4964	17.4444	chr1	49372130	49374130	NHP2L1	63.0936	34.2069	37.6775	54.7386	38.5273	41.3712	59.9651	42.1584	45.0871	28.3464	43.6338	32.6845	39.4193	44.9819	21.4267	24.338	24.3716	26.5725	25.1872	22.4399	0.467781	0.0375367
chr1	49367049	49373397	21.1343	18.7448	23.4881	24.2168	18.6097	14.628	25.9766	16.5291	18.7648	19.7735	18.2427	21.2848	16.5541	22.3412	9.53677	11.5498	24.8889	13.0809	22.4964	17.4444	chr1	49367023	49369023	CCDC134	25.7534	22.7212	22.0238	28.3581	35.3999	12.0271	32.6366	16.2481	42.0358	16.2829	40.5024	20.7825	29.3794	13.7572	17.3453	18.4329	15.3214	20.0609	11.0041	4.064	0.151517	0.523688
chr1	49367049	49373397	21.1343	18.7448	23.4881	24.2168	18.6097	14.628	25.9766	16.5291	18.7648	19.7735	18.2427	21.2848	16.5541	22.3412	9.53677	11.5498	24.8889	13.0809	22.4964	17.4444	chr1	49372130	49374130	MEI1	0.209587	1.1072	0.0736445	0.123931	0.120185	0.307364	0.0901123	0.357872	0.550188	0.22416	0.190284	0.571538	0.715728	0.286339	0.378181	0.760578	0.129002	0.330983	0.378586	0.503853	-0.43095	0.0578291
chr1	49428250	49429461	1.99148	0	0	0	0	0.103308	0.0333778	0.13744	0.0337838	0	0.0227842	0	0	0	0	0	0.0322581	0	0	0	chr1	49426868	49428868	DESI1	18.3456	55.6916	10.2033	15.2229	39.15	15.2866	15.2321	18.6469	12.6655	12.8687	39.9038	17.5147	18.6752	16.9089	16.2794	12.1341	11.3261	14.0793	18.4858	17.4378	-0.0385735	0.871733
chr1	49428250	49429461	1.99148	0	0	0	0	0.103308	0.0333778	0.13744	0.0337838	0	0.0227842	0	0	0	0	0	0.0322581	0	0	0	chr1	49426868	49428868	DESI1	0.0788707	0.117986	0.667857	0	3.01666	0.103426	0.495697	0.58259	0	1.4559	1.92341	0.226092	1.93088	0	0.600863	1.0912	0.604838	0.59058	0.0267604	0	-0.182308	0.44172
chr1	49485472	49486748	0	0.0233427	0.144928	0	0	0	0	0	0	0	0	0.0295508	0	0	0	0	0	0	0.0171703	0	chr1	49484050	49486050	PHF5A	50.2972	20.8995	25.743	36.8209	15.8885	20.2548	46.3733	27.0091	18.1542	19.1257	12.6284	10.4811	20.3876	20.0279	33.7995	8.25778	20.2988	19.0287	16.5042	11.63	-0.00916046	0.969425
chr1	49510795	49512192	4.12605	6.00559	19.4771	3.68325	5.54068	1.27709	6.54765	16.6625	20.7291	9.43547	15.4554	9.66386	4.70653	3.85531	13.1739	8.24589	11.1001	12.4234	9.74987	10.6187	chr1	49512180	49514180	TEF	36.6856	18.6168	15.7596	24.4972	88.7997	34.3945	33.8657	109.524	20.8997	31.1317	80.7781	31.0942	21.4184	46.2645	33.9229	15.4016	27.1214	47.2312	66.3526	85.6248	0.157156	0.508163
chr1	49763416	49764567	0.0265816	0.068306	0.108225	0.064433	0.041958	0	0.0687143	0	0	0.0976744	0.0897129	0.0231481	0	0.115079	0.0560769	0.0584853	0.0204583	0	0.0521225	0.0346861	chr1	49761822	49763822	SLC25A17,ST13	69.2344	57.1412	19.8545	46.1613	42.2675	27.9078	50.345	52.8027	35.5753	22.7656	34.6073	33.6998	27.7333	30.2446	32.3572	20.1183	18.8801	40.9036	35.872	48.9521	-0.200893	0.395726
chr1	50651565	50652447	0	1.03914	0	1.75439	0	0.444444	1.85185	0	1.96078	2.89855	0.984849	0	0	0	0	1.06383	0	0	0	0	chr1	50649897	50651897	DNAL4	2.97985	10.8172	3.75511	7.04849	19.2415	7.57062	21.3008	22.6071	9.95816	9.76713	19.6566	6.66129	5.97641	5.53747	19.5195	4.03837	7.18689	10.6723	8.87405	7.5469	0.108511	0.648836
chr1	50664914	50666682	7.70071	2.57732	2.69618	18.1818	8.04843	6.17218	6.14001	4.32961	5.4375	1.38889	6.12543	0	9.93172	12.1212	8.75816	12.4865	3.56425	6.04725	12.5	2.08333	chr1	50663621	50665621	ENSGALG00000012217,SUN2	26.5584	16.4866	52.2286	29.7238	25.2979	53.1321	21.8304	45.4689	46.4789	16.5857	42.0005	24.106	13.3604	26.7451	22.2815	18.607	23.5149	40.1774	40.0189	22.0906	-0.0493731	0.836235
chr1	50664914	50666682	7.70071	2.57732	2.69618	18.1818	8.04843	6.17218	6.14001	4.32961	5.4375	1.38889	6.12543	0	9.93172	12.1212	8.75816	12.4865	3.56425	6.04725	12.5	2.08333	chr1	50663621	50665621	GTPBP1	23.1026	12.614	11.2633	12.3291	14.6273	12.1145	11.283	10.697	11.8889	10.6082	12.8515	10.6146	7.89966	15.1869	11.8671	11.3547	9.89068	10.1508	14.4678	11.2752	0.240184	0.307727
chr1	50719039	50719497	0.613027	0.35461	1.5625	0.505916	0.245098	0	0	0.45045	1.25	0.273034	0	0.463836	1.12782	7.28079	0	1.95136	0	5.71429	0.490951	0.671907	chr1	50717185	50719185	DMC1	1.96733	2.35014	0.145799	2.81828	0.608329	0.581	0.70148	0.569054	0.532138	0.220912	0.905466	0.193363	1.00129	0.731238	0.202725	0.888749	0.940601	0.298702	0.881211	0.492033	-0.150345	0.526941
chr1	50733543	50734551	0	0.552792	0	0.0560676	0	0	0	0	0	0	0.238095	0.381679	0	0	0	0.595238	0.340136	0	0	0.0410172	chr1	50731993	50733993	DDX17	89.005	69.5771	115.329	54.7699	46.8443	58.555	45.2813	24.8885	121.505	69.3575	52.7549	63.7184	37.4845	50.1015	87.5753	46.1011	49.6206	58.1389	54.9708	55.756	-0.142422	0.549184
chr1	50733543	50734551	0	0.552792	0	0.0560676	0	0	0	0	0	0	0.238095	0.381679	0	0	0	0.595238	0.340136	0	0	0.0410172	chr1	50731993	50733993	KDELR3	11.5304	12.1171	15.0736	13.494	6.26945	11.3018	14.9164	7.01647	16.6868	15.1281	8.76056	12.9343	4.89611	9.30581	14.6842	15.3503	6.05309	12.7714	9.11363	17.4018	0.0353515	0.882372
chr1	50784256	50785081	20.4598	11.1213	18.0985	14.4737	13.7819	11.343	5.77018	13.5869	9.52332	6.74603	12.9298	16.5848	12.8894	18.5659	13.9285	21.0955	12.2523	15.1045	9.44444	24.539	chr1	50782762	50784762	CSNK1E	26.6896	7.81516	11.205	17.8761	13.4616	12.5914	13.5093	12.9222	14.7843	17.5664	15.5145	19.7032	9.22777	18.2532	16.2134	11.2091	11.5623	12.3671	16.3772	13.3077	0.18422	0.436863
chr1	50806764	50807466	0	0	3.63636	0	0	0	0	0	0	0	0	3.22581	0	0	0	0	0	0	0	0.512821	chr1	50805004	50807004	TMEM184B	38.9267	17.4247	26.2129	25.8999	23.4619	11.7457	17.2592	25.0314	15.5838	20.7969	27.8779	17.279	17.5963	49.8448	16.1446	11.2881	53.5823	22.686	37.1773	18.9778	-0.0921683	0.699147
chr1	50835155	50837076	0	0.574713	0	0	0	4.83871	0	0	0	6.41026	0	14.375	0	1.85185	0	0	8.90625	0	0	0	chr1	50834273	50836273	PLA2G6	4.51079	6.60135	4.10486	4.91852	8.4028	3.20162	4.92088	2.72589	5.40289	2.26786	6.89282	4.06708	6.33508	12.6019	16.1102	4.47126	3.24802	3.2441	6.26256	2.29911	-0.24973	0.288301
chr1	50927305	50927829	0	0.37037	0	0.185185	0	0	0.0470323	0.847458	0.490196	0	0.029274	0	0.035461	0	0.0300481	0	0.0268817	0.0462535	0.0540541	0.138889	chr1	50925638	50927638	C22orf23	0.209867	0.0966085	0.16823	0.617906	2.35875	0.127908	0.501946	0.211581	0.395697	0.667975	2.52226	1.28047	0.734719	0.457204	11.557	0.246871	2.26949	0.223319	0.737056	0.585959	-0.172558	0.466921
chr1	50927305	50927829	0	0.37037	0	0.185185	0	0	0.0470323	0.847458	0.490196	0	0.029274	0	0.035461	0	0.0300481	0	0.0268817	0.0462535	0.0540541	0.138889	chr1	50925638	50927638	MICALL1	10.3435	1.85104	3.53323	4.57107	4.89294	3.21171	2.29564	9.25537	3.08644	6.19323	5.41124	6.96451	1.97343	5.6887	2.21158	2.51287	2.40046	7.66637	5.65397	10.1596	0.171031	0.470933
chr1	50962935	50963918	0	1.03093	0	0	0	0.02405	0	0	1.28205	0.151515	0	0	0.027972	0	0	0	0	0.0973277	0	1.34804	chr1	50961679	50963679	ANKRD54	12.8365	5.31161	4.97786	9.81425	3.39699	6.02228	5.33959	3.9387	5.856	3.9419	3.7225	3.7842	4.24158	5.68695	7.48931	6.22397	5.33141	4.98637	4.00825	3.7088	-0.132778	0.576811
chr1	50983441	50984263	78.6618	58.8587	40.2691	73.5099	63.9518	75	74.8664	78.6793	62.9032	65.5035	70.4559	72.2456	55.7861	68.357	81.0632	61.0088	37.4903	73.3304	74.0228	69.169	chr1	50981575	50983575	ENSGALG00000019312	0.513911	0	12.6853	0	0	0	8.78387	0	0.181052	18.8018	0	0.800244	0	0	0	0	0.43273	0	0	0	-0.253755	0.280343
chr1	50983441	50984263	78.6618	58.8587	40.2691	73.5099	63.9518	75	74.8664	78.6793	62.9032	65.5035	70.4559	72.2456	55.7861	68.357	81.0632	61.0088	37.4903	73.3304	74.0228	69.169	chr1	50984026	50986026	ENSGALG00000012312	18.3472	80.5289	17.9197	15.1971	8.03863	5.30552	19.8452	8.69209	1.10648	9.00023	8.98786	4.24472	8.6251	28.6859	23.12	152.194	2.51427	5.19524	8.43382	4.73659	-0.130254	0.584141
chr1	51029000	51030181	0.238052	0.364035	0.205696	0.348831	3.04525	0.628571	0.544872	5.70652	5.14196	0.313879	0.521432	0.640864	0.617977	6.49046	3.11697	0.209314	0.894932	1.18188	0.789988	0.698796	chr1	51027936	51029936	ENSGALG00000012422	1.01581	0.887813	8.8757	1.46417	0.538193	1.45644	0.294026	1.75249	12.6571	0.316358	1.0107	1.99717	0.821358	0.801517	0.430178	0.0801521	1.18098	3.04021	1.01245	1.8813	0.259928	0.268405
chr1	52521795	52523434	2.00059	1.18122	6.37242	3.10582	1.64343	1.46417	1.47492	5.00273	6.23724	1.32947	1.83086	3.99047	1.95232	2.29667	2.15549	2.17879	3.73528	7.86359	1.24719	6.14198	chr1	52520921	52522921	LARGE	52.3327	6.85273	4.44747	32.4804	73.5052	10.0745	13.2704	13.7184	8.03722	16.9662	104.799	17.328	10.0376	9.3074	7.08328	14.4202	6.50357	9.91153	47.7701	5.52814	-0.367061	0.111384
chr1	53587853	53589412	0.42735	0.158193	0	0.235849	0	0	0	0.228311	0	0	0.128205	0.819672	0	0	0	0	0	0	0	0	chr1	53588896	53590896	MTERF2	2.08793	5.97464	0.404185	1.24928	2.1492	0.846099	0.386438	1.47272	0.702722	0.769208	1.60544	1.34597	2.01684	2.96208	1.25131	1.86999	1.38999	1.10524	1.51589	2.35274	0.0920905	0.699389
chr1	54792076	54793384	0.020879	0.0639583	0.173445	0.185644	0.439299	0.153349	0.0122339	0.417811	0	0.166329	0.156968	0.696475	0.0163881	0.0485437	0.0406798	0.0065591	0	0.0954309	0.00911245	0	chr1	54790165	54792165	NFYB	13.4855	21.864	9.89094	10.4782	6.99679	7.22646	7.46866	8.28902	13.1069	7.57263	5.15162	8.00532	6.98033	19.432	7.62378	6.65528	6.98741	11.6196	5.0342	11.1357	-0.197577	0.403733
chr1	55601262	55601709	0	0	0	0.536131	0	0	0	0	0	0	0	0	0	0	0	0	0	0	0.520833	0	chr1	55599446	55601446	CCDC53	13.1712	17.1873	6.6492	16.0341	9.04281	11.1259	12.4475	15.7466	13.3927	10.0741	9.49962	12.7571	6.48953	25.0754	10.3421	5.9113	10.6978	11.8219	10.1357	19.6094	0.0563892	0.813332
chr1	55670825	55671833	0.0800475	0.0900901	0.0340136	0.0505835	0.00951837	0	0	0	0	0.0254647	0.0424166	0.0184264	0.020879	0	0.293586	0.00629247	0.043947	0	1.43822	0	chr1	55669157	55671157	GNPTAB	50.8703	15.9667	9.38867	24.6537	6.61429	13.955	15.4675	11.0184	15.7602	18.6769	5.7282	17.6674	12.5856	14.6995	12.3266	12.2377	16.4904	11.2415	10.8413	17.5822	-0.0937366	0.694262
chr1	56701556	56702653	1.65692	8.33303	21.1818	1.41161	13.4291	1.78571	5.94276	2.93388	5.02639	12.534	9.96656	7.11411	5	7.65572	0	2.33918	7.62712	11.1951	6.27794	7.80879	chr1	56699685	56701685	AKR1D1	0.441422	39.4868	0.905589	4.04354	3.48955	4.61627	22.5966	2.61776	1.68328	1.67718	1.70496	23.2011	0.359037	5.02139	0.167926	1.86875	3.33285	3.1475	2.93815	4.205	0.0332233	0.889411
chr1	57068719	57070035	1.42848	0	0.434229	0	0.384556	0.176481	0.241187	0.119048	0.950472	0	0.228869	0.0310559	0.159808	0	0.0928722	0.348165	0.0952381	0.133511	0	0.440346	chr1	57068704	57070704	BRAF	15.9687	22.0979	23.7271	13.7603	15.9799	16.4336	12.9646	16.2047	31.5036	16.3227	15.7097	16.2222	15.3379	20.1893	21.5388	20.9946	24.9174	18.6535	17.6984	24.3953	0.270235	0.249194
chr1	57502548	57503638	2.79296	1.22097	9.73303	2.35542	18.3325	4.55372	2.69682	16.132	8.54073	3.796	24.0513	4.20845	3.9552	5.84714	1.6229	2.04398	9.16909	8.90656	11.3974	6.35105	chr1	57500888	57502888	CREB3L2	10.7237	28.6085	9.70211	21.3275	6.1129	11.3006	23.6368	12.2566	18.1875	40.1283	5.44168	24.6137	8.49956	9.65104	38.8494	12.1087	7.65352	17.3115	13.1396	26.5957	-0.546811	0.0125983
chr1	59687658	59690214	12.6646	7.81568	6.93618	14.9431	22.7477	11.9135	7.45353	11.8253	2.72099	5.2416	23.695	13.836	10.9218	13.8762	6.9957	9.27168	11.8642	22.4931	11.3625	7.15732	chr1	59685897	59687897	FAM60A	2.29343	2.00773	5.38939	3.4907	1.10169	3.24952	22.3183	4.36668	16.2788	6.38819	1.43862	4.54726	1.68689	2.65793	4.21189	2.82437	4.69473	4.05035	3.10901	7.33669	-0.498425	0.0253004
chr1	59720636	59722102	13.0435	2.7988	5.74597	14.1544	0.438312	2.32241	1.41115	14.5128	7.16777	3.80853	0.190398	18.0971	0	16.4835	0.704225	0.0452899	4.83871	5	8.4958	12.5192	chr1	59719496	59721496	CAPRIN2	1.82234	1.41104	0.481729	1.04638	2.75098	1.11897	12.6953	0.884902	1.26846	1.64949	2.40829	0.914079	1.25593	4.26582	1.32369	3.96152	1.30105	0.850543	1.79641	1.57379	-0.214905	0.362878
chr1	60139491	60140779	3.48485	0.487222	2.54579	1.37228	1.37037	1.75	0.567955	1.15546	0	1.36224	0.712573	0.924807	1.06383	1.82027	2	0.701923	2.48352	3.8764	1.36517	1.58112	chr1	60137732	60139732	IQSEC3	0.042973	0.31952	0.00671521	0.11292	8.71141	0.0491555	0.687036	0.126309	0.0746911	0.878495	8.37004	0.0494815	0.0655227	0	0.0461436	0.260387	0	0.15608	7.72341	0.358342	-0.192514	0.416125
chr1	60572838	60574794	0.153294	7.44106	4.7619	0.0952953	0.0434783	4.79323	0	4.14079	8.88664	3.18829	1.86916	9.86403	0.796569	11.1794	2.59259	11.0806	9.41177	0.15625	7.81382	10.4776	chr1	60571791	60573791	WNK1	194.043	12.3422	13.9548	30.598	11.072	13.1744	13.5306	13.0131	15.1707	18.9387	10.2312	18.7022	47.0539	24.4606	5.6994	10.2068	8.73497	17.3114	19.2961	21.5557	-0.29486	0.206936
chr1	60572838	60574794	0.153294	7.44106	4.7619	0.0952953	0.0434783	4.79323	0	4.14079	8.88664	3.18829	1.86916	9.86403	0.796569	11.1794	2.59259	11.0806	9.41177	0.15625	7.81382	10.4776	chr1	60571791	60573791	RAD52	21.712	1.72657	1.80713	4.97055	2.52731	1.78154	3.51243	2.41685	2.70101	2.79994	2.28486	2.31547	5.49853	4.32895	0.926579	1.20765	1.25893	2.91331	3.04282	5.54125	-0.296631	0.204094
chr1	60688515	60688995	0	1.42157	0.961539	0.235266	1.85185	1.42857	0	0.384615	6.21622	3.05823	0	0.806452	2.63158	0	1.88679	0	0.833333	3.92157	0.520532	2.44856	chr1	60686652	60688652	ERC1	13.129	10.6166	3.75229	7.19032	9.97777	9.6738	7.72288	9.71135	3.55473	10.258	12.6202	8.06769	6.56021	7.4954	6.23219	4.99187	5.88775	9.73144	6.8032	10.4742	-0.214269	0.364333
chr1	61042955	61045237	42.8929	44.536	59.5633	50.0515	48.8054	38.5834	39.15	50.1354	40.6492	50.6001	55.3107	54.1816	56.8949	61.2751	42.3938	41.8119	63.3642	66.126	52.7709	55.5153	chr1	61042204	61044204	WNT5B	39.44	7.53436	0.72719	32.5031	1.83561	6.38625	5.3665	6.03186	3.74077	3.31642	1.68817	3.40861	5.53527	4.7741	35.2726	1.35263	0.99782	8.87402	8.29238	1.91204	-0.310783	0.182308
chr1	61067574	61068561	0.171248	0	0.0957384	0.107905	0.0651042	0	0	0	0.174216	0	0.0739671	0.0896057	0.136364	0	0	0.0474383	0.0507099	0.0287604	0.0439174	0	chr1	61065943	61067943	ADIPOR2	123.087	38.5766	43.5868	55.4912	17.6148	28.2484	34.8759	42.1441	29.3867	45.1425	16.5134	33.1304	25.1256	59.1757	30.5552	15.5002	31.7159	34.7366	35.9588	36.8138	0.308384	0.185885
chr1	62185203	62185934	0	0.0467508	0.97561	0.189394	0	0	0.221729	0	0.252101	0.245098	0.243902	0	0	0	0	0	2.08333	0	2.15517	0.260417	chr1	62183417	62185417	PEX26	7.22771	6.92795	2.85544	3.80005	7.51596	2.66501	4.20887	6.33719	2.83411	1.64362	7.42815	3.04902	4.27249	2.94507	4.52369	5.99722	2.86563	3.50414	4.49002	3.69974	-0.236484	0.315464
chr1	63429258	63429782	3.0303	0.135685	0	0.578704	0	0	0	0	6.11111	0.571429	0.703125	0	0	0	0	0.31746	0	0	0.18797	1.04167	chr1	63427326	63429326	MGST1	6.76221	508.79	46.941	25.4704	37.4639	17.9227	47.6368	35.8848	20.2853	32.3575	45.099	57.944	144.188	58.0629	39.2473	19.8276	27.8446	41.7293	29.7009	39.1507	-0.159638	0.501401
chr1	66734430	66735762	2.25155	0.410524	0.162243	0.305958	0.114286	0.357143	0.104657	0.805153	0.988701	0.0621118	0.0955338	0.67094	0.273556	0.524738	0.749153	2.38776	0.241546	0.655687	0.792208	0.144928	chr1	66732709	66734709	ST8SIA1	0.0932669	0.614214	7.85547	0.868256	19.5682	1.27188	3.9887	1.43922	9.81332	22.0467	19.1874	1.42907	0.442881	5.01333	1.6889	4.20963	2.15022	2.7466	10.3872	1.54671	-0.297429	0.202821
chr1	66734430	66735762	2.25155	0.410524	0.162243	0.305958	0.114286	0.357143	0.104657	0.805153	0.988701	0.0621118	0.0955338	0.67094	0.273556	0.524738	0.749153	2.38776	0.241546	0.655687	0.792208	0.144928	chr1	66732709	66734709	ENSGALG00000026487	0.0396839	0.0609024	0.663622	0.0479377	1.54787	0.0913072	0.216625	0.0634573	0.400436	0.832839	0.650299	0.148659	0.0590483	0.286695	0.0419324	0	0.450288	0.368974	0.847151	0.106162	-0.374055	0.104221
chr1	66734430	66735762	2.25155	0.410524	0.162243	0.305958	0.114286	0.357143	0.104657	0.805153	0.988701	0.0621118	0.0955338	0.67094	0.273556	0.524738	0.749153	2.38776	0.241546	0.655687	0.792208	0.144928	chr1	66732709	66734709	ST8SIA1	0.0760298	0.080499	0.61141	0.118782	0.254264	0.0968723	0.102211	0.095021	0.623802	1.15822	0.351271	0.241176	0.026641	0.179965	0.0575234	0.167585	0.0652764	0.247138	0.56137	0.245919	-0.193311	0.41416
chr1	66734430	66735762	2.25155	0.410524	0.162243	0.305958	0.114286	0.357143	0.104657	0.805153	0.988701	0.0621118	0.0955338	0.67094	0.273556	0.524738	0.749153	2.38776	0.241546	0.655687	0.792208	0.144928	chr1	66732709	66734709	ST8SIA1	0.165834	0.119551	0.806987	0.109618	0.474716	0.0971907	0.103797	0.094752	0.746245	2.64222	0.599307	0.292883	0.0364147	0.262059	0.137119	0.198535	0.158607	0.431598	0.79582	0.422756	-0.225333	0.339479
chr1	66734430	66735762	2.25155	0.410524	0.162243	0.305958	0.114286	0.357143	0.104657	0.805153	0.988701	0.0621118	0.0955338	0.67094	0.273556	0.524738	0.749153	2.38776	0.241546	0.655687	0.792208	0.144928	chr1	66732709	66734709	ST8SIA1	0	1.39296	3.48004	2.24326	29.6409	3.64564	9.2705	3.36019	6.03491	23.8083	20.6008	1.48588	0	4.05828	3.08418	7.32064	3.65688	2.37836	19.7769	4.01793	-0.27135	0.247169
chr1	67102478	67103683	3.0303	14.049	5.29412	15.2929	19.0145	8.24468	12.5917	16.7849	22.5015	22.7732	13.8095	15.2542	29.1667	37.9977	19.5652	25.8929	4.41176	26.2712	25.511	13.7814	chr1	67100584	67102584	KCNJ8	1.23565	1.68031	0.0833383	3.26243	1.43969	2.04787	5.24106	5.21957	13.0522	4.95566	1.95454	2.35796	1.3243	9.80306	0.490399	0.404864	5.31892	3.62269	2.29935	5.70911	0.318761	0.170749
chr1	67177846	67178720	0.0610501	0	0	0.0274123	0.0409165	0	0	0.0830565	0.943396	0.0679996	0.0495909	0.0187441	0.0269833	0.0169779	0.0658761	0.368802	0.141844	0	0.0713719	0.990826	chr1	67175977	67177977	LDHB	12.1491	805.041	44.826	116.884	308.927	89.4722	286.412	159.441	115.288	155.114	333.677	154.406	371.887	1186.63	146.501	60.5229	55.5484	102.924	204.961	88.619	-0.237007	0.314363
chr1	67331417	67331966	0.077714	0	0	0	0	0	0.0865801	0	0	0.0295508	0.117102	0	0.316456	0	0.0679348	0	0	0	0.0198455	0.0926407	chr1	67329583	67331583	LYRM5	3.85499	8.99343	1.91312	2.88189	2.04429	3.65196	2.32211	1.73309	2.68621	2.81769	1.70898	2.76076	6.09656	8.85848	3.47986	1.30948	1.88726	2.26072	2.22232	2.66434	0.180718	0.445781
chr1	67331417	67331966	0.077714	0	0	0	0	0	0.0865801	0	0	0.0295508	0.117102	0	0.316456	0	0.0679348	0	0	0	0.0198455	0.0926407	chr1	67329583	67331583	KRAS	8.56401	16.102	7.67858	8.59382	23.4582	9.94699	15.469	11.499	13.451	12.9215	20.0387	14.3165	13.3112	16.7751	8.26521	5.28002	16.2364	14.5806	11.8297	20.6647	0.116768	0.623949
chr1	67644712	67646128	11.259	3.24349	15.3139	10.5189	13.0803	7.24685	5.41728	8.37607	8.79929	23.608	21.4229	7.58478	9.87927	8.75982	0.69823	3.16156	10.7219	5.97481	14.3889	4.05762	chr1	67643210	67645210	RASSF8	31.7009	14.5041	4.2099	21.8675	9.17819	29.3269	24.9591	19.0488	8.86745	55.6988	8.78162	24.2016	14.378	66.8407	7.73448	9.57648	15.2057	22.8081	23.5383	20.3238	0.223364	0.343828
chr1	68133612	68134715	0.0258799	0.0393046	0	0.112554	0.119048	0	0.0578704	0	0.0694445	0.0537538	0	0	0	0.0675591	0	0	0	0.0718391	0.0471986	0.100575	chr1	68132345	68134345	FGFR1OP2	11.0727	13.9739	11.8953	7.0609	17.1131	6.95853	6.50933	13.1371	17.2681	4.72853	16.0839	5.84516	6.09839	12.5069	6.1543	4.11031	6.9239	8.16948	7.72242	11.1304	0.29379	0.208667
chr1	68225489	68226571	0.156986	0.0401946	0.0809061	0.0632511	0.0486573	0	0	0.396825	0.140579	0.0732004	0.0303048	0	0.238749	0.104085	0.060553	0.019992	0.036062	0.337213	0.0270856	0	chr1	68223781	68225781	STK38L	12.1685	6.10691	17.0441	11.5421	7.68524	9.80258	10.1634	9.89991	13.0553	4.84612	7.08714	11.2503	4.53582	22.1803	7.6828	3.78497	11.4184	13.4389	7.94442	26.0182	-0.0100336	0.966512
chr1	69266934	69268173	0	1.61392	1.53558	0.112045	2.79294	0	0	16.9753	1.17647	0.0277162	4.62963	14.9425	0	6.84931	7.11611	0	3.125	1.28205	0.498656	0	chr1	69265277	69267277	PARVB	22.1211	11.04	19.4901	9.02761	7.96558	1.40866	13.6934	4.28885	6.92615	15.339	6.93824	8.08888	0.503939	57.9799	1.02511	0.737561	4.29893	3.25015	6.71303	3.71278	0.0751375	0.752888
chr1	70373868	70375135	0.13369	0.0411167	0	0.105974	0.111664	0	0	0	0	0	0.0380518	0.0290698	0.0329598	0.107604	0.0653082	0.100441	0	0.0468384	0.0217373	0.126263	chr1	70372264	70374264	NUP50	26.9034	23.6484	9.00869	14.1558	12.6084	5.41658	26.4528	11.4263	16.2081	13.1062	12.0727	10.5478	10.0096	9.51789	15.8833	5.53288	8.19919	8.21948	7.64705	12.0302	0.144991	0.541924
chr1	71408282	71409858	3.28517	0.485818	2.24206	1.74335	0.954008	3.35935	1.13307	2.87039	4.15753	3.74998	1.45977	5.54678	2.6558	0.811303	0.569107	2.5862	1.36776	6.71436	1.65915	7.05524	chr1	71406477	71408477	PPAR	7.60443	91.7025	0.567038	3.75317	2.33079	5.30103	1.02121	12.2943	1.66514	2.49445	2.39996	2.70327	25.6594	18.8389	3.77095	6.65903	0.549938	6.19391	2.88806	7.03899	-0.256592	0.274815
chr1	71618920	71621505	0	0.737583	1.15822	0.042517	5.27094	0.0951826	0.0402901	0.951322	0.0143431	0	0.247619	0	0.643275	0.753683	0	0	0.0533333	0.239528	0.0151515	0.0135281	chr1	71618200	71620200	TEL	12.3531	10.3919	12.5767	14.923	2.22622	17.5423	9.2914	18.7456	20.0095	14.0358	2.39706	16.7514	9.76045	9.98027	18.3463	11.6681	13.5945	19.2455	10.5147	10.1588	-0.500729	0.0245269
chr1	72117198	72118804	0.783376	0.395422	4.64763	0	3.15798	0.680254	0.66824	1.97133	2.29853	0	0.904042	0.367647	3.10527	1.08173	0.406559	1.25761	1.83039	1.13772	0.714286	7.33333	chr1	72116419	72118419	ENSGALG00000014141	0.930284	0.872207	0.0403747	0.461363	0.53976	0	0.412025	0.293674	0.141433	0.492921	0.306836	0.291603	0.653552	0.508087	0.201538	1.45871	0.324973	0.288727	0.316716	0.852609	0.0893706	0.707888
chr1	72137508	72138196	0	0	0	0	0	0	0	0	0	0	0	0	0	0	0	0	1.72414	0	0	0	chr1	72135905	72137905	CREBL2	5.30408	4.56217	1.19644	1.92367	5.19603	2.60311	1.41178	1.13099	2.21053	1.39649	4.45963	1.50598	11.9305	1.82445	3.89747	2.72854	1.86069	1.72527	2.48433	2.38697	-0.116742	0.624026
chr1	72273476	72279005	0.0955764	0.259339	0.268305	0.0121448	0.367998	0.0497715	0.508446	0.14998	0.167446	0.0101774	0.320513	0.0629775	0.253497	0.551835	0.161812	0.0160927	2.17852	0.472335	0.0117256	0.303836	chr1	72271752	72273752	CDKN1B	58.6599	35.7654	75.665	45.2809	24.3289	47.8821	26.6875	56.6087	68.983	23.7922	22.9863	33.5196	36.2023	50.9366	53.3169	32.3904	66.6823	61.0542	50.2498	50.4081	0.28043	0.231078
chr1	72450495	72450989	0.163399	0	0	0	0.0517598	0.0408497	0	0	0.0520833	0	0.149738	0	0	0.032175	0	0.0243072	0.0280112	0.0657267	0.0313972	0.0740741	chr1	72448563	72450563	MRPS35	16.5744	17.8109	6.29369	12.3666	7.52183	10.7243	15.7829	6.67284	8.56309	6.87058	6.98802	7.43922	12.0121	43.3207	9.66423	8.78252	9.01085	7.78739	6.89155	5.74288	-0.00666933	0.977737
chr1	73666196	73666773	0	3.26595	7.69231	17.3077	0	2.5641	7.97102	28.7234	21.3415	5.43478	7.69231	10.2041	4.48718	0	12.5	0	3.84615	0	25.8621	16	chr1	73664832	73666832	KCNA1	0	0	0	0.0758303	13.3077	0.0626292	3.66167	0.419906	0.890266	1.91366	11.6601	0.174697	0	0	0.0243217	0.571123	0	0.196519	2.9593	0.0740923	-0.113758	0.632978
chr1	75323578	75324223	0.193234	0.509175	0.100652	0.0452899	0.0602773	0.019253	0.129336	0.0283688	0.0499867	0	0	0.158547	0.0786978	0.020903	0.376891	2.92075	0.140482	0.0476312	0.0363636	0	chr1	75321701	75323701	SLC2A3	17.7484	5.89451	33.6844	21.9569	39.4716	25.912	21.9573	28.372	27.0175	10.8171	32.8491	16.7968	11.2509	11.9448	5.41745	3.1801	14.4841	19.6006	14.1974	15.4965	-0.456614	0.0429899
chr1	75445023	75451041	0.129111	3.57447	3.01067	0.567021	0.255787	0.180246	0.228873	4.82323	4.4135	0.10764	0.0966584	3.85141	0	0.191027	0.301811	5.64274	0.166667	0.625	0.193453	1.34682	chr1	75448120	75450120	RIMKLB	2.36562	1.61147	4.12799	6.61891	17.7613	4.5922	10.0356	10.2539	7.05159	11.1009	19.514	7.04576	3.8832	4.09318	24.4493	2.29014	4.60295	11.0749	7.27638	26.4099	-0.263191	0.262226
chr1	75640511	75641688	0	0.746269	0	0	0	0	0	0	0.93633	0	0	3.77358	0	0	0	0	0	0	7.14286	0	chr1	75638947	75640947	PHC1	2.94972	10.4401	3.17178	2.24639	3.37829	2.75519	4.72557	2.27494	4.93158	3.35353	2.7794	4.40228	2.25925	2.72264	3.32621	2.9095	2.45209	2.7105	2.49638	4.23646	0.0399212	0.867289
chr1	75640511	75641688	0	0.746269	0	0	0	0	0	0	0.93633	0	0	3.77358	0	0	0	0	0	0	7.14286	0	chr1	75638947	75640947	M6PR	33.5922	61.803	22.3888	30.5497	42.7059	27.29	29.5046	27.4551	60.7332	25.186	36.5422	38.1624	34.2934	32.305	38.2617	35.9773	31.0733	26.852	29.0738	24.5643	0.0597555	0.802394
chr1	76247431	76247957	0	0	1.11111	0.289855	0	0	0	0	0.438597	0	0	0.35461	0	0	0	0	0.555556	4.7619	0.130719	0	chr1	76245534	76247534	CSTB	12.3888	21.6042	3.01779	23.1871	27.0002	16.322	19.8431	34.3442	12.1692	14.9271	23.1056	17.3153	24.766	21.9287	28.3947	9.14183	15.7685	26.4499	20.3481	45.2243	-0.00273254	0.990878
chr1	76431800	76433831	0.426397	0.89483	0.00979624	1.70118	0.776597	0.103306	0.947094	0	5.10411	10.0943	7.73709	2.70133	1.55644	1.14214	0.249705	2.56964	0.0730039	0.162372	6.70097	1.41066	chr1	76432205	76434205	GAPDH	34810.8	1138.77	409.53	16307.4	1398.94	456.35	987.729	901.989	267.935	486.672	1289.26	387.78	587.623	2245.03	236.981	121.82	191.752	549.689	1780.99	273.047	-0.142649	0.548538
chr1	76619236	76631267	11.8276	21.9513	32.349	10.9834	12.7486	7.92789	19.8002	24.9575	27.9345	19.2515	12.918	15.7871	11.6522	19.4301	11.6388	10.5768	26.6312	17.024	7.38945	15.9569	chr1	76628626	76630626	COPS7A	111.324	26.2288	21.3136	48.2215	32.9322	31.2718	29.4404	17.9496	20.153	25.4996	28.4686	21.116	26.4842	51.6774	23.112	17.8512	22.5125	21.6125	19.4912	20.6912	-0.243404	0.301088
chr1	76713263	76714183	17.8352	13.0268	64.5034	13.9883	32.0939	3.16222	5.76676	31.3362	51.9372	27.0408	24.862	18.4077	27.9238	26.5091	3.76087	14.0586	46.676	30.6548	24.2851	47.155	chr1	76711581	76713581	LEPREL2	1.18068	6.82518	0.753889	4.68374	2.00627	3.96196	8.47596	3.01343	2.58722	6.92304	2.78988	4.17908	5.44904	3.26908	0.873563	1.09333	1.87374	4.60484	4.20519	5.23376	-0.287499	0.219034
chr1	76753473	76758672	0	3.87857	9.51361	0.02	0.0598086	8.24491	5.84077	7.38761	2.5	0.00847458	0.0476191	2.52525	1.0101	0.5	3.24074	0.980392	13.0787	9.45312	0.214224	6.52058	chr1	76752053	76754053	TPI1	3441.91	185.947	80.7668	1403.48	249.587	56.2438	89.2322	62.7417	73.6049	47.6471	257.046	69.0976	119.921	167.056	64.4694	32.4769	31.5907	65.8023	186.868	37.2298	-0.332243	0.152374
chr1	76804539	76806347	6.87788	4.70419	0.0846647	2.89852	0.0506586	8.60656	5.70578	7.10849	7.90268	2.88743	3.86387	4.87329	0.74947	6.64225	2.73345	3.14604	0.0350336	9.91613	11.5981	0	chr1	76803324	76805324	C12ORF57	43.8118	109.346	54.8702	109.709	106.648	73.5096	66.9044	54.352	51.7354	40.3798	102.627	62.7345	180.107	147.88	97.892	43.4248	53.3524	94.8371	83.945	18.3593	-0.00193428	0.993543
chr1	76804539	76806347	6.87788	4.70419	0.0846647	2.89852	0.0506586	8.60656	5.70578	7.10849	7.90268	2.88743	3.86387	4.87329	0.74947	6.64225	2.73345	3.14604	0.0350336	9.91613	11.5981	0	chr1	76805819	76807819	PTPN6	5.66134	49.7253	48.0839	10.398	3.59675	12.4455	5.4902	17.338	136.147	7.1753	4.2894	33.4468	17.3671	9.96403	23.72	15.7731	11.6774	21.0113	7.77407	18.3513	0.132813	0.576711
chr1	76804539	76806347	6.87788	4.70419	0.0846647	2.89852	0.0506586	8.60656	5.70578	7.10849	7.90268	2.88743	3.86387	4.87329	0.74947	6.64225	2.73345	3.14604	0.0350336	9.91613	11.5981	0	chr1	76805819	76807819	PHB2	46.3778	102.119	35.4895	47.3266	18.4454	40.7154	38.9866	34.2804	33.8086	22.348	23.5963	28.8771	66.7371	104.798	38.2717	51.8485	22.9727	33.138	30.3654	15.6178	0.147455	0.535006
chr1	77813445	77814918	0	0.0355114	0.684932	0.0578439	0.062422	0	0	0	0.253093	2.38095	0.617284	0	0	0.0278707	0.211864	0	0	0.163399	0.025146	1.97635	chr1	77811955	77813955	STYK1,YBX3	252.522	11.8081	38.2134	112.307	1.75586	39.6366	33.4378	18.3481	9.62005	15.7982	1.94697	18.7501	26.9079	34.5403	11.0219	9.29011	13.8633	29.4717	34.6878	20.2989	-0.161941	0.495167
chr1	78133055	78149313	46.2488	8.93625	16.5826	35.788	14.8439	11.7554	11.8894	30.1382	15.4823	12.0712	13.7063	18.5012	10.6615	18.4028	14.069	9.89344	11.6659	27.2521	27.0669	14.5818	chr1	78142138	78144138	TBX15	44.5564	0.080154	0.709911	19.0643	0.109439	0	0.00914954	1.80241	0.0814926	0	0.076808	0.105733	0	0.0668721	0	0.205876	0	5.53245	10.3897	1.0726	0.864601	8.79395e-07
chr1	78555429	78556243	0	0	0	0.151515	0	0	0	0	1.14943	0.30303	0	0	0	0	0	0	0	0	0	0	chr1	78553952	78555952	GDAP2	7.00514	8.75288	4.97124	5.18517	5.76782	4.98119	8.51118	4.45926	6.37477	4.63152	5.00442	4.48624	3.29228	7.82432	5.78401	4.15938	4.30829	4.78277	3.65041	3.66342	0.113087	0.634997
chr1	78671107	78672051	0	0.111111	0	0	0	0	1.23457	0	0	0	0	0	0	0	0	0	0	0	0	0	chr1	78669302	78671302	KIAA2018	3.53402	1.65002	3.49454	1.82383	1.50875	1.85324	1.13613	1.26688	2.99208	2.20342	1.77562	2.4629	1.15357	1.93969	1.5258	1.41297	0.992145	2.17576	1.88066	4.08863	-0.256404	0.27518
chr1	78832731	78836469	0.132068	0.463125	0.394963	0.111656	0.0384937	0.0755248	0.183491	0.0411184	0.071347	0.0994132	0.176849	0.667237	0.1141	0.11329	0.251518	0.0289754	0.164766	0.0454011	0.930213	0.0825711	chr1	78833722	78835722	TNFRSF1A	5.80297	8.63157	4.1312	15.395	1.19651	5.31572	5.976	20.9977	10.222	6.74702	1.53343	16.5257	4.76595	9.77877	5.56801	5.16025	4.26219	16.0989	8.4902	15.6449	0.0401946	0.866388
chr1	78861393	78862112	2.76511	0	1.81884	0.534759	0	0.125	0	0.185983	0.0943396	0	0.436992	0	0.0343171	0.517752	0.165113	0.0600601	0.288248	0.138504	0	0	chr1	78859462	78861462	POLQ	0.181272	0.25852	2.16847	0.189658	0.467394	0.156841	1.59008	0.338089	0.737782	0.4163	0.741645	0.497538	0.131696	0.124905	0.0393167	0.176621	0.155036	0.349642	0.199601	0.184781	0.273956	0.24248
chr1	79373164	79374544	17.029	35.4	34.3077	15.8064	30.5411	16.9444	14.9668	37.8231	28.5088	20.1065	45.0798	32.5882	21.8254	19.3924	1.75439	23.643	36.9369	61.6667	38.0181	32.2061	chr1	79371785	79373785	GPR156	1.94076	0.305878	0.105651	0.920459	1.69826	0.182809	0.791424	0.662991	0.581625	0.717273	1.69444	0.287745	2.21114	0.522177	0.460937	0.2666	0.542599	0.369504	1.26739	0.185465	-0.0655601	0.783616
chr1	79401606	79404774	1.11573	1.33563	5.34276	2.2699	1.13926	2.93011	0.541117	2.04799	1.8366	0.646046	0.357038	0.826446	0.273083	0.384615	0.117242	0.0610501	1.45758	2.60206	1.12222	4.28922	chr1	79401483	79403483	GSK3B	39.3428	7.97097	16.7759	15.4717	24.9706	11.9301	12.96	10.5159	13.494	16.4033	22.5057	11.9132	8.30734	18.1967	9.39398	7.45251	12.1643	11.5695	14.2883	15.5904	0.0193612	0.935428
chr1	79401606	79404774	1.11573	1.33563	5.34276	2.2699	1.13926	2.93011	0.541117	2.04799	1.8366	0.646046	0.357038	0.826446	0.273083	0.384615	0.117242	0.0610501	1.45758	2.60206	1.12222	4.28922	chr1	79400637	79402637	ENSGALG00000022892	10.2342	2.05308	15.9746	12.1121	16.8856	6.92182	9.70901	0.699356	6.19035	19.0367	31.1458	8.94406	7.33229	13.2967	17.4844	2.30096	7.87323	5.67765	14.269	1.20525	-0.249539	0.288683
chr1	80031174	80036992	0.0914634	0.0766871	0.154321	0.121723	0.094697	0.993095	0.017507	0	0.0672043	0.0204707	0.0859107	0	0	0.73931	0.193798	0	0	0	0.222264	0.0126182	chr1	80033913	80035913	B4GALT4	3.70842	8.19671	4.31104	4.63306	4.42303	2.71532	8.47501	4.88571	5.72119	3.48579	4.3391	3.54962	5.61179	2.1415	8.29068	1.38024	2.71471	4.44192	3.89187	3.06188	-0.270936	0.247921
chr1	81871382	81872708	0	0	0	0	0	0	0	0	0	0	0	0	0	0	2	0	0	6.38298	2.94118	0	chr1	81870358	81872358	ZBTB20	131.987	96.7392	14.4273	51.9538	13.8402	52.0264	23.1851	53.241	13.938	63.5547	16.2691	40.6291	69.1235	24.9442	36.4018	38.7466	55.814	62.0953	46.5691	69.259	0.0610944	0.798053
chr1	82978689	82980035	0	0.0538793	0.173913	0.0139489	0	0.833333	0.188679	0	0.0634518	0.0445931	0.105932	0	0	0	0	0	0.208333	0	0.0191036	0	chr1	82977591	82979591	ATG3,F5	23.4794	285.44	15.3666	15.0189	20.9169	16.5816	20.6881	19.6441	18.3771	12.1911	16.1289	12.1727	25.95	27.3748	16.7099	17.0761	17.9437	12.6977	12.1113	10.855	-0.0426644	0.858255
chr1	83614595	83616343	0.10101	1.96878	0	0.0179211	1.09069	0	0	0.719425	1.56361	0.0242072	0.108783	0	0	0.0156937	0	0.0967586	0	0	0.0259277	0.0334074	chr1	83612755	83614755	ST3GAL6	46.9286	2.93473	11.3986	28.7272	6.67175	24.6698	23.3697	15.9885	11.9314	23.5291	6.06555	15.3108	12.5429	44.9033	11.4636	12.2954	14.1369	13.2749	15.3856	22.6657	-0.409905	0.072662
chr1	83614595	83616343	0.10101	1.96878	0	0.0179211	1.09069	0	0	0.719425	1.56361	0.0242072	0.108783	0	0	0.0156937	0	0.0967586	0	0	0.0259277	0.0334074	chr1	83612755	83614755	COL8A1	3.41543	0.409289	1.55434	30.1936	0.573615	8.83929	31.837	25.0042	5.12131	49.0281	0.722524	5.37581	0.561199	10.1552	2.50344	0.698432	10.6641	12.3986	8.01851	17.6657	-0.234161	0.320381
chr1	84710468	84715165	0.0778503	0.134348	0.0258465	0.0407829	0.0801095	0	0.0367282	0.0488422	0	0.0831523	0.00668986	0.105265	0.10946	0.00884173	0.06424	0.0515114	0.0810641	0.0585208	0.0294018	0.057237	chr1	84712810	84714810	PCNP	14.2749	17.497	13.2531	9.93696	27.0147	12.8542	16.5591	13.9031	15.4659	12.8025	25.5452	11.7873	9.68089	18.2766	10.6479	3.52652	11.5914	15.4282	10.9659	14.1795	-0.128384	0.589594
chr1	86979778	86980282	0.298507	0	0.954861	0.5485	1.87801	0.132275	2.02247	0	0	0.0406639	3.125	0.0835626	0	0.298297	0	0.0212585	0.0631313	0	3.90174	0.020429	chr1	86979139	86981139	SH2D1B	0.574723	3.48827	3.64841	1.08101	0.327059	0.39777	0.3835	1.61501	5.94302	0.13098	0.46887	2.89447	0.704348	0.986346	6.7243	0.747836	0.677521	3.82009	0.992035	1.93725	-0.320359	0.168495
chr1	87937383	87937809	0.0915751	0	0.480769	0.0961538	0.207605	0	0.113122	0	0	0.125086	0	0.0474834	0.113122	0.0362845	0.137363	0.104255	0.083612	0	0.223817	0.0362845	chr1	87935489	87937489	ABHD10	2.87879	5.78024	2.91735	4.04259	2.88103	3.52814	3.99609	5.1853	4.84454	2.43111	2.91646	2.90309	3.18275	3.70065	3.37259	1.12879	1.51171	2.85331	3.21068	4.45742	-0.325447	0.161456
chr1	88159270	88160979	2.14008	0.0442929	0.090777	0.0170068	0.0536975	0.0712251	0.896231	0.194175	1.03693	0.934211	0.12676	0.130369	0.0676916	0.0635728	0.114926	0.0467894	0.0905624	0.144278	0.0579422	0.735294	chr1	88158551	88160551	ZNF654	9.1301	6.82828	3.69246	4.99309	3.44909	4.21956	4.40229	5.14792	7.2121	3.99546	2.98571	3.96397	3.3149	5.49748	4.87968	3.09653	4.56637	4.96662	3.66649	7.78297	0.68175	0.000931205
chr1	88542874	88544412	5.77796	0.327607	1.83601	3.53111	3.19333	1.50316	1.88983	6.8988	0.780353	0.973167	1.51159	2.41573	1.9436	5.76122	0.497323	0.25141	3.98463	4.64297	3.50263	3.00224	chr1	88541352	88543352	EPHA3	1.48019	0.20132	1.50854	3.73509	35.2905	6.49416	15.4797	3.24341	1.79913	26.2297	43.0076	3.39212	1.99094	5.90064	1.76976	2.16941	2.17146	5.7581	3.88054	8.94558	-0.132657	0.577161
chr1	89077593	89078637	0	0.292383	0	0	0	0	0	0	0	0	0	0	0	0	0	0	0	0	0	0	chr1	89076321	89078321	ARL13B	4.25536	3.68448	1.79128	3.71952	2.95929	3.78743	4.29359	4.06518	3.83976	3.26786	3.26368	3.61181	2.69915	5.13034	4.50033	1.36203	2.66403	3.82361	3.71591	6.10362	0.0127937	0.957307
chr1	89077593	89078637	0	0.292383	0	0	0	0	0	0	0	0	0	0	0	0	0	0	0	0	0	0	chr1	89076321	89078321	STX19	0.369636	0.618665	0.360662	0.334699	1.47221	2.83733	0.432693	1.85026	0.726106	0.383304	1.35596	0.491084	0.319589	0.302609	0.674469	3.36367	4.98711	0.77263	2.19827	1.18202	-0.119222	0.616626
chr1	90584240	90584945	0	0	0	0.0523286	0	0	0	0.205761	1.25786	0.0604912	0	0.292955	0	0.026455	0.15625	0	0.462963	0	0.0270307	0.235156	chr1	90582373	90584373	ARL6,CRYBG3,ENSGALG00000015429	4.80759	18.2288	18.7114	11.1701	14.8834	29.0569	11.0735	13.1529	17.403	6.29731	11.1225	14.955	27.6394	32.9027	42.702	10.182	12.0048	12.6337	20.4156	21.4137	-0.00144522	0.995175
chr1	90584240	90584945	0	0	0	0.0523286	0	0	0	0.205761	1.25786	0.0604912	0	0.292955	0	0.026455	0.15625	0	0.462963	0	0.0270307	0.235156	chr1	90582373	90584373	MINA	4.25626	7.23254	4.8974	4.97344	3.1106	15.9949	4.19224	6.40746	7.29179	2.55792	2.77696	5.13494	7.0656	11.8609	7.88361	3.82869	2.81919	5.54667	4.28221	7.91946	0.0313301	0.895679
chr1	90861160	90863283	0	0.215517	0	0	0	0	0	0	0	0	0	0	0	0	0	0	0.990099	0	0.102459	1.11111	chr1	90860251	90862251	BRP44	174.432	546.056	35.6401	107.651	67.6504	53.6874	93.7811	41.3162	29.5764	56.9173	69.9221	57.4022	190.529	522.225	67.3378	138.653	21.3299	30.9221	60.976	21.5009	-0.130665	0.582944
chr1	90907956	90911424	0	2.40128	3.22917	0.332226	0	0	0	0.990099	3.48069	1.28205	0	2.41379	0	0	0	0	0	5.15464	2.27273	3.88889	chr1	90909418	90911418	RCSD1	4.92113	9.66617	22.1859	5.59572	1.23028	4.60827	3.11007	4.39791	36.3347	3.07501	1.41973	10.2874	2.69635	15.5132	1.14177	1.65943	7.79189	7.32824	5.85773	3.04904	0.472196	0.0355356
chr1	90954850	90955776	0.110579	0.0481347	0.0773851	0	0.111643	0.0724737	0.0124008	0.114069	0.0125141	0.0282636	0.0605154	0.0706215	0.0785976	0.0426837	0.148761	0.0744863	0.0408679	0.0779029	0.0351327	0	chr1	90953205	90955205	CREG1	42.4743	58.6407	72.3078	32.4496	9.89591	27.107	12.372	45.4049	65.2943	15.5411	9.46212	26.94	29.2999	80.6306	15.0693	21.615	97.7561	25.9151	29.6112	40.8238	-0.219432	0.352609
chr1	91358067	91359821	0	3.5101	8.7766	3.61395	1.56028	0	0	1.0929	16.048	0	23.1735	0	22.449	7.27273	1.92308	0	18	22.4138	8.87097	0	chr1	91356684	91358684	PTGFRN	3.27162	4.99526	1.77691	8.47683	0.897637	36.7912	16.1639	17.23	5.11743	6.20568	0.698469	10.5515	2.38501	7.06214	9.42076	13.4023	3.66838	15.0137	6.60542	11.7911	-0.364812	0.113761
chr1	91724359	91725539	26.3414	17.6335	38.6683	14.1828	32.3244	25.359	22.5224	22.473	16.2451	38.5009	31.2748	9.1181	25.8848	32.4806	4.25593	9.53663	37.817	28.3748	21.0778	10.9091	chr1	91723241	91725241	BCL9	2.19664	2.52952	0.521954	1.54564	2.72211	2.32955	2.87025	1.40724	0.613712	4.10619	2.82287	3.14752	1.13433	1.45812	3.07991	0.822486	1.85632	2.05462	2.09457	2.69056	-0.0213189	0.928914
chr1	91724359	91725539	26.3414	17.6335	38.6683	14.1828	32.3244	25.359	22.5224	22.473	16.2451	38.5009	31.2748	9.1181	25.8848	32.4806	4.25593	9.53663	37.817	28.3748	21.0778	10.9091	chr1	91723241	91725241	BCL9	0.687496	0.797213	0.0838145	0.348292	0.343008	0.527974	0.460584	0.34288	0.261846	1.0766	0.272169	0.761091	0.422775	0.370461	0.822679	0.268847	0.432757	0.479925	0.322338	1.23087	-0.286632	0.220487
chr1	98637523	98638870	0.246269	0.439588	6.87793	3.68469	0	0.800525	0.177305	5.16768	5.07223	0.369048	0.0398089	3.54428	1.69025	5.87708	0	2.02114	1.10957	7.1134	2.1003	5.91483	chr1	98635751	98637751	ENSGALG00000015701	0.310631	49.6968	4.4004	2.14364	5.34819	18.2007	15.444	27.9133	0.639648	7.97027	7.63831	16.1377	14.1773	92.4245	17.5463	18.1443	8.00194	9.08871	6.99373	11.6669	0.171307	0.470206
chr1	98864836	98865605	0.398671	6.48331	1.35582	0.481928	0.62994	0.28201	1.39728	2.90807	6.72241	0.27972	0.940775	1.50152	1.20236	0.909091	0.759274	1.26376	0.987385	2.32006	0	5.76923	chr1	98862911	98864911	CHODL	0.407293	0	0	2.14742	0.879571	1.89544	0.162102	0.155787	0	0.0252826	1.77204	0.0267048	0	0.117943	0	0	0.202665	0.0577895	0.426348	0.0236027	-0.365757	0.112758
chr1	100030509	100032362	3.11554	2.76307	9.72687	1.71296	1.87738	1.5189	2.26785	3.47863	5.96507	1.24589	1.23941	8.52841	2.52278	2.7971	0.503291	0.503421	3.22741	6.9207	0.505146	6.50794	chr1	100028848	100030848	NCAM2	0.0599314	0.0332773	0	0.0125973	20.1634	0.218505	0.475929	0.051075	0.0476129	0.517384	17.9311	0.199353	0.0202051	0.436329	0.0221329	0.115011	0.0672462	0.220954	4.34007	0.14035	-0.265149	0.258559
chr1	100346629	100415221	27.5951	15.3776	20.5674	21.5134	20.145	27.6936	23.9431	28.8276	20.5225	37.3164	38.1747	32.7424	27.5849	23.0771	33.9271	22.3111	26.3284	38.0919	31.9579	24.803	chr1	100349581	100351581	5_8S_rRNA	3102.32	14036.2	33728.8	4177.3	10142.2	33537.8	10776.3	22487.6	10528.9	60142.6	15579.9	44313.2	21242.2	14619.5	95958.7	136775	14796.3	7998.02	12883.5	14412	0.133693	0.574165
chr1	100346629	100415221	27.5951	15.3776	20.5674	21.5134	20.145	27.6936	23.9431	28.8276	20.5225	37.3164	38.1747	32.7424	27.5849	23.0771	33.9271	22.3111	26.3284	38.0919	31.9579	24.803	chr1	100360919	100362919	5_8S_rRNA	2.14606	4.11033	1.62118	1.6089	0	5.27537	0.51	13.8542	2.01694	0.455396	0	19.7208	15.1254	0	0	122.299	0.643552	3.23389	2.06879	0	-0.141694	0.551247
chr1	100346629	100415221	27.5951	15.3776	20.5674	21.5134	20.145	27.6936	23.9431	28.8276	20.5225	37.3164	38.1747	32.7424	27.5849	23.0771	33.9271	22.3111	26.3284	38.0919	31.9579	24.803	chr1	100360919	100362919	5_8S_rRNA	0	0	0	0	0	0	0	0	0	0	0	0	0	0	0	4144.71	0	0	0	0	-0.173367	0.464803
chr1	104059746	104061566	0	1.00137	0	0.0744048	0	0	0	1.72414	0	0	0.641026	0	0	2.12766	1.51515	0.490196	0	0	4.63458	4.52107	chr1	104058635	104060635	HUNK	0.708561	1.28026	0.379656	2.29269	7.46101	1.57324	2.88052	2.2849	1.00261	3.12984	6.64746	4.44322	0.694903	5.88435	0.354947	7.66321	10.3864	2.5067	6.92262	3.50172	0.176673	0.456197
chr1	104618409	104619389	0.833333	0.042735	0	0	0	0	0	0.277778	0	0	0	0	0	0	0	0	0	0	0.15873	0.105042	chr1	104616732	104618732	IFNAR2	7.67353	17.8997	13.9682	9.82568	9.06101	9.18073	10.4045	10.9386	20.1604	10.668	8.26831	14.0614	6.1101	13.1858	11.6166	7.30503	11.1251	12.2663	7.93805	14.4223	-0.233562	0.321655
chr1	104632500	104633061	0	0	0.900901	0.073828	0.324675	0.396825	0.0661376	0	0.201613	0.113333	1.21173	0.0884434	0.15625	0.11943	0	0.437876	0.297619	0	0.702844	0.0297692	chr1	104630501	104632501	IL10R2	6.16213	11.1917	5.55316	8.25831	2.51831	9.0468	3.88798	14.4362	15.699	3.98871	3.47772	9.09385	9.407	9.84841	15.9585	34.2756	21.8206	12.0439	4.62847	8.25564	-0.149774	0.52853
chr1	104683396	104684209	0	0.274725	0.304498	0	0	0.269986	0.148059	1.06425	0.123183	0	0	22	1.09879	0	2.7114	0	0	0	0	0	chr1	104681686	104683686	IFNGR2	38.3777	26.6052	14.9223	30.8403	12.1699	26.4944	19.2401	22.4927	20.351	25.0854	12.2487	23.6617	9.54017	22.348	15.2611	7.2473	14.7913	28.5277	12.9637	19.9182	0.0770182	0.746894
chr1	104683396	104684209	0	0.274725	0.304498	0	0	0.269986	0.148059	1.06425	0.123183	0	0	22	1.09879	0	2.7114	0	0	0	0	0	chr1	104681686	104683686	DNAJC28	22.4308	45.1337	17.9556	21.7684	24.5991	17.3287	14.9528	32.2876	25.3453	13.434	23.5838	17.9471	17.4615	36.4108	43.7597	13.8491	21.9724	26.6904	14.944	27.8777	-0.0888181	0.709619
chr1	104841561	104843266	0	0.380952	0	0	0.263158	0	0	0	0	1.92308	0	0	0.320513	1.31579	0.877193	0	0	0	0.109649	0	chr1	104840389	104842389	ITSN1	26.345	22.0958	7.08271	16.4069	25.8706	11.5184	17.6916	9.42677	19.6754	15.6157	21.8406	17.8158	7.62693	20.2177	16.6224	6.70213	7.50762	15.5765	12.7604	11.4906	0.162443	0.493812
chr1	105342718	105344187	12.2076	6.52484	10.5246	6.50271	9.99832	6.2672	5.15849	10.57	12.9884	18.7038	4.47273	3.88128	4.15692	3.42875	0.646427	10.2235	10.2208	6.47142	21.6667	5.63875	chr1	105342000	105344000	CLIC6	0	0.139592	0	0.0856544	0.13301	0.882887	0.0634221	0	0.0138186	0.0744463	0.525841	0.954748	14.7837	0.154475	102.884	1.25787	0.99706	0	9.01637	0	-0.336942	0.146306
chr1	106011377	106012448	0.135501	0.561404	0	0	0	0	0.243902	0	0	0.0370782	0.406504	0	0	0.187617	0	0	0	0	0	0.0773017	chr1	106009588	106011588	MORC3	19.2071	21.6641	22.5403	12.1388	9.08093	13.1679	8.3858	13.6712	28.1626	8.48752	7.61069	8.93759	9.74448	16.2984	17.3632	5.66079	20.5204	14.8423	10.2485	17.4849	0.0619127	0.795402
chr1	106039572	106040242	0	0	0	0.0439952	0	0.0680272	0	0	0	0.0725593	0.327108	0	0	0.0771605	0	0	0	0.297619	0.103164	0.0291206	chr1	106037784	106039784	CHAF1B	1.8997	1.91852	5.67556	1.45814	1.97523	1.69484	4.42605	4.24859	5.3249	1.55546	2.74587	2.3668	0.909579	2.10445	2.74639	0.514555	1.58729	2.70331	2.49423	4.4993	-0.0558245	0.81517
chr1	106174611	106186106	9.40038	9.91577	13.1075	19.8332	10.299	9.02568	8.13939	20.3105	12.0722	13.8304	12.5332	16.8973	7.67603	20.0799	7.16341	10.4972	10.8276	23.0028	16.3643	13.9095	chr1	106176800	106178800	SIM2	46.7959	0.0870226	0.116652	5.0517	0.0315888	0.111075	0.0536066	0.0717058	0.151495	0.133336	0.121751	0.104839	4.2224	0.0856494	0.13432	0.0469494	0.0613308	0.483424	0.212865	0.475031	-0.17749	0.454085
chr1	106174611	106186106	9.40038	9.91577	13.1075	19.8332	10.299	9.02568	8.13939	20.3105	12.0722	13.8304	12.5332	16.8973	7.67603	20.0799	7.16341	10.4972	10.8276	23.0028	16.3643	13.9095	chr1	106176800	106178800	HLCS	7.79171	17.9048	9.42614	8.30828	5.63936	4.38673	7.63307	7.10093	13.0485	6.57121	5.43278	9.7965	5.83899	7.11488	6.28304	3.93362	8.51187	9.79588	5.54513	12.405	0.0945955	0.691592
chr1	107368312	107369453	0.0623855	0	0.0390625	0	0.0912234	0.171821	0.0638604	0	0	0.018615	0.0319125	0.0398724	0.0600962	0	0.0490196	0.0440826	0.0159642	0	0.0484665	0.045372	chr1	107367074	107369074	WRB	8.0224	14.8646	3.57145	6.93516	18.064	5.81124	10.9548	5.85355	6.95079	5.46122	15.1025	4.72094	6.74516	11.6214	8.49048	4.4938	4.70402	5.36418	8.96233	7.49462	0.0669896	0.779008
chr1	109359750	109360594	0	0.0984252	0	0.173611	1.04167	0	0	0.5	0	0	7.01754	0	0	1.6129	0	0	0	0	0	1.47059	chr1	109358239	109360239	RRP1B	12.1208	10.3381	6.40895	8.54918	5.82774	6.22705	11.1675	8.83804	13.0546	7.05682	5.89926	7.77649	6.07268	8.86355	8.08127	6.88233	6.24294	6.34192	4.9746	10.6621	-0.167439	0.480437
chr1	109396095	109396734	0.0200481	0.0730838	0.0957854	0.0598239	0	0	0.125108	0	0.357143	0.0442096	0.0372024	0	0	0.0149925	0	0	0	0	0.0238418	0.0333333	chr1	109394194	109396194	PDXK	11.0099	100.473	11.4196	29.9818	74.9905	19.4243	37.7435	24.7751	20.5057	28.0696	71.6523	44.7249	52.4818	35.5396	92.9695	39.0252	30.1673	23.0731	28.2059	41.1744	-0.180605	0.446072
chr1	109643099	109643726	0	0.22227	0	0.0544662	0	0	0	0	0	0.197628	0	0	0	0.127877	0	0	0	0	0.0258799	0.113122	chr1	109641317	109643317	ENSGALG00000022802	5.09201	6.20154	4.92657	5.85377	3.98835	2.85552	6.98746	7.63917	5.98173	3.3595	4.57864	4.81049	2.17755	3.61298	3.44788	2.98358	2.50599	4.66667	3.52176	7.80285	0.157385	0.507538
chr1	109661397	109661853	0	0	0	0	0	0	0	0	0	0.185185	0	0	0.362319	0	0	0.292398	0	0	0.197628	0	chr1	109659534	109661534	C1H21ORF33	95.1038	41.6222	9.52727	39.3976	19.1099	14.0507	13.5127	8.04388	8.87494	20.4756	15.5108	18.8892	40.7862	128.654	9.92126	20.9347	6.67591	15.3337	21.3812	22.9553	-0.0106089	0.964593
chr1	111403710	111404258	0	0	0	0.174593	0	0	0	0	0.384615	0	0	0.130378	0	0.595238	0	0	0	0	0	0	chr1	111401800	111403800	RPL8	798.381	660.373	654.768	952.753	304.046	1027.78	873.609	881.737	1076.63	666.083	308.473	488.14	642.076	903.188	1028.94	1483.87	494.702	676.309	422.245	291.481	0.264837	0.259142
chr1	111724645	111737776	52.7041	56.7624	62.9023	58.0657	59.3806	53.3174	55.7683	60.0924	56.5954	54.716	53.4773	59.5375	50.4484	52.992	51.7689	46.8196	55.6429	55.4465	54.9492	58.0969	chr1	111729503	111731503	BCOR	5.68201	2.46674	6.11778	2.56263	2.40535	4.63615	2.80566	2.09421	3.94204	3.49505	2.5927	4.86114	3.21628	4.79395	2.719	3.09437	3.22821	3.71834	4.33134	3.36682	0.0978112	0.681626
chr1	113256101	113257052	0	0.709087	0.231481	1.15567	2.2	0.423694	0.464417	3.25043	2.91868	0.883899	0.173611	0.54054	5	0	0	0.326797	0	2.9533	0.105263	4.59486	chr1	113254479	113256479	TMEM47	5.49474	1.67359	0.533372	4.34198	12.1893	5.75524	2.78448	0.773353	7.40971	2.64134	12.2113	1.73812	0.281027	17.8479	0.565493	0.704341	7.3138	1.98804	9.09046	4.48969	-0.232561	0.323793
chr1	117677952	117678995	0	0	0	0.431034	0.0176367	1.38746	0	0.00755858	0.719425	5.55556	0.340136	5	1.22007	0	0	0	0	0.0680556	0	0.980392	chr1	117676667	117678667	KLHL15	17.3229	12.762	15.9445	10.9448	21.205	12.8185	11.2512	12.341	19.6555	9.65444	18.0986	9.66415	9.26603	13.9161	16.1513	8.57709	15.2736	11.3398	12.1804	16.2723	-0.388713	0.0903021
chr1	119272724	119273728	3.35225	2.48183	6.19114	5.09748	1.70087	3.89897	2.7883	9.97494	9.92177	7.0028	1.80992	10.0898	2.34942	12.2779	1.15969	1.43765	4.59274	4.8466	4.53609	26.7261	chr1	119270907	119272907	MAP7D2	0.024644	24.4475	0.125851	0.108578	81.5274	4.98871	9.56464	15.9434	0.0405468	8.42943	70.4247	2.76094	7.3401	0.109367	8.19216	2.75425	1.56953	7.06841	9.34134	14.0859	-0.212994	0.367262
chr1	119396899	119398956	9.09091	1.00935	4.05405	0	0	0	0.480769	0	0	8.82353	2.73973	0	0	0	22.7273	0	1.49254	3.50877	0	0	chr1	119396129	119398129	SH3KBP1	30.1973	15.2459	18.9396	20.6015	5.67661	9.84057	10.0647	14.6982	70.8527	15.0201	6.59787	18.2172	9.5229	6.32994	7.30111	5.57339	23.1807	17.1637	8.60488	15.6616	-0.069977	0.769403
chr1	120800941	120801520	0.0779665	0	0.0759084	0	0.0371057	0	0	0.0398724	0	0.0281294	0.0378788	0.0850519	0.091627	0	0.015006	0.0294855	0.0298066	0.0314099	0.0223015	0	chr1	120799372	120801372	RBBP7	0.825648	1.62555	3.51407	1.75366	1.14358	4.03561	8.26145	7.33784	5.0089	5.18024	1.25196	2.32897	2.68928	2.36194	1.86489	2.97202	3.16821	2.91005	1.98516	5.51057	-0.273885	0.242608
chr1	121231909	121233216	0	0.101626	0	0	0	0	0	0	0.0400962	0	0	0	0	0	0	0	3.27869	0	0	0	chr1	121230734	121232734	AP1S2	14.0642	31.43	16.5746	10.1185	5.1917	18.6878	26.8047	14.7842	25.5726	10.0941	5.48367	13.4933	7.49548	10.8591	2.75379	6.40775	10.3579	13.9879	23.7373	20.3819	-0.100928	0.672016
chr1	125535217	125535708	2.73125	2.47542	0.399267	0	1.84347	0.54917	0.078064	10.3583	2.71318	0	0.236856	0.898165	0.307989	7.3132	2.25148	4.44801	1.4114	0.419891	0.195695	2.98507	chr1	125533613	125535613	PNPLA4	1.31316	1.5861	1.57989	1.15149	1.31634	0.783861	1.28556	1.75481	1.56927	1.05607	1.10937	1.87363	1.15835	1.12313	1.56228	0.441309	1.21544	1.4699	1.03146	1.71345	0.163439	0.491132
chr1	125535217	125535708	2.73125	2.47542	0.399267	0	1.84347	0.54917	0.078064	10.3583	2.71318	0	0.236856	0.898165	0.307989	7.3132	2.25148	4.44801	1.4114	0.419891	0.195695	2.98507	chr1	125533613	125535613	PNPLA4	0.536831	0.642722	10.6701	0.804686	0.248592	0.785164	0.278178	1.26351	2.61605	0.464954	0.300198	1.39544	0.262009	0.500115	0.199331	0.230323	1.33751	2.06119	0.429469	1.31434	-0.112173	0.637753
chr1	127484246	127484760	0	0.452381	1.40845	0.141243	2.71429	0.574713	0	0	0	0	0.135501	0	0.348432	0	0.431034	0	0	0	0.039185	0	chr1	127482249	127484249	PRKX	1.30167	2.31281	4.29006	1.74542	2.61139	2.8798	2.59189	10.1942	5.22781	2.45339	2.55322	4.64406	2.49029	6.35658	3.35968	1.26228	3.35213	5.94255	2.71972	13.5217	-0.174824	0.461
chr1	127679536	127680751	1.05105	1.30841	1.81792	2.79221	2.09884	1.70989	0.430403	9.89671	2.31801	1.05933	1.61276	7.90626	3.07744	1.81641	1.75999	1.04498	3.85805	2.15868	2.15103	1.82736	chr1	127677909	127679909	MXRA5	8.3018	0.0951298	0.21304	28.7633	0.60921	7.38476	1.45167	16.5258	0.95493	7.15014	0.750137	12.3696	1.0684	20.0118	0.449863	0.457506	2.34448	17.7464	12.8142	39.1438	0.213072	0.367083
chr1	128034818	128036112	0.0672043	0.742457	0.26519	0	0.0718391	0.099359	0	0.0640628	0	0	0.230748	0	0	0	0	0	0.173611	0.0566893	0	0	chr1	128033463	128035463	DHRSX,ZBED1	8.63389	5.75264	6.68963	10.3154	7.75941	10.9988	6.25772	11.8215	5.1789	9.62872	7.95106	10.0079	4.5756	6.54625	5.35876	6.11873	10.029	19.9187	10.4037	22.0077	-0.181665	0.44336
chr1	129085527	129099278	14.411	11.0315	11.4481	23.5816	13.082	9.89174	9.73383	29.001	14.8586	9.24568	15.5237	8.66759	16.4646	12.9578	10.6662	10.4212	11.0164	19.1763	21.8669	13.9967	chr1	129084062	129086062	SHOX	0.394842	0	0.363989	0.571308	0	0	0	0	0	0	0	0.0906035	0	0	0	0.208556	0	0.436062	0.894911	0.945333	0.36387	0.114768
chr1	129302867	129303442	0	0	0	0	0	0	0	0	1.20968	0	0	0	0	0	0	0	0	0	0	0	chr1	129300921	129302921	PPP2R3B	7.1278	1.7741	1.48657	3.57718	2.81499	1.27244	2.84862	1.48382	1.16896	1.67076	2.39747	0.902151	0.816814	12.8797	1.46766	1.17898	1.02283	1.24769	3.42608	1.93792	-0.122022	0.608312
chr1	129302867	129303442	0	0	0	0	0	0	0	0	1.20968	0	0	0	0	0	0	0	0	0	0	0	chr1	129300921	129302921	STAG3	5.08501	4.58012	3.28452	2.8797	2.21705	3.00547	3.71288	3.49511	4.97401	2.51833	2.31506	3.09839	2.06751	2.90916	3.48886	1.85442	2.74807	2.30592	3.34174	4.28383	0.442184	0.0509184
chr1	129591687	129592470	0	2.11422	0	0.030248	0	0	0.256082	2.16895	0.179856	1.4014	1.42222	0.181159	5.90278	0	0	8.4507	7.14286	0.568182	0.1153	0.0566893	chr1	129590231	129592231	SLC9A7	1.35664	6.37826	10.6651	1.91303	17.6088	2.32039	5.20074	3.57736	14.5674	8.29157	15.6855	4.40861	2.64418	2.23451	21.1816	3.39239	5.23357	2.67192	5.67199	2.52731	-0.215823	0.36078
chr1	131441074	131441744	0.5	0	0.0571755	1.63934	0.967645	0.044603	0.0965099	0.421995	0.0868643	0.191026	0.0526316	0.118191	0	0	2.41316	0.036036	0.152152	0.0654966	0.097561	0	chr1	131440852	131442852	TMEM131	17.6207	22.3633	12.6336	7.92924	6.93116	4.58338	4.67814	6.8755	19.7322	7.39572	5.56079	8.09001	4.25269	7.05668	5.63138	7.17684	4.55195	8.17708	4.51022	13.8961	-0.149476	0.529359
chr1	132725672	132726115	0	0	0	0.188125	0	0	0	0	0	0.0822368	0	0.0443066	0	0.031348	0	0.0522466	0.114943	0	0.041859	0.0626566	chr1	132723767	132725767	RPL31	181.029	358.777	260.684	376.151	162.429	363.077	312.97	251.969	491.182	226.457	194.593	224.68	199.235	354.946	535.119	568.828	154.77	303.113	169.435	234.414	-0.0271973	0.909381
chr1	132725672	132726115	0	0	0	0.188125	0	0	0	0	0	0.0822368	0	0.0443066	0	0.031348	0	0.0522466	0.114943	0	0.041859	0.0626566	chr1	132723767	132725767	TBC1D8	15.5136	4.93289	1.84131	7.18384	1.41405	7.30073	1.49984	2.36597	9.79576	1.26868	1.06792	3.77121	10.4182	5.97275	23.6253	10.532	5.92598	3.59555	3.10042	5.26222	-0.0755572	0.751549
chr1	132802634	132803891	0	0.119904	0	0	0	0	0	5.64516	0	0	0	1.25	0	0	2.08333	0	0	0	0	0.847458	chr1	132801061	132803061	CNOT11	29.8645	5.419	5.6354	14.8478	5.66571	5.04138	6.34282	5.76403	5.49315	5.35686	6.39792	6.45259	4.31666	7.48527	6.64795	5.82206	4.46142	5.10219	5.37023	6.76332	-0.089332	0.708009
chr1	133354495	133355414	0	3.18985	0.877193	4.46405	0	0	0.137363	1.77432	8.92014	6.47059	9.85863	0	0	1.31579	0	0.37594	0.531915	0	3.57143	1.08932	chr1	133352848	133354848	SLC9A2	11.6646	0.0621295	0.0632861	2.4197	0.807445	9.1665	0.0549992	0.109967	0.0441845	0.0791755	0.470343	0.769071	16.9494	0.024017	0.196126	0.0356951	9.7407	0.367384	1.40138	0.145668	-0.309895	0.183627
chr1	134479574	134480237	0.343359	0.0441537	0.552894	0.114351	0.128776	0	0.101585	0.625	0	0.0856922	0.222343	0.250407	0.152294	0.249906	0.090009	0.0967896	0.485847	0.230892	0.297947	0.0631313	chr1	134479594	134481594	C1H2ORF49	9.19615	4.968	2.48012	4.77404	3.78587	3.34538	3.34808	2.41035	4.49957	4.01142	3.15362	2.2869	2.26364	13.1777	3.19991	1.2998	2.55911	2.5406	2.4426	3.19149	-0.0286543	0.904548
chr1	134479574	134480237	0.343359	0.0441537	0.552894	0.114351	0.128776	0	0.101585	0.625	0	0.0856922	0.222343	0.250407	0.152294	0.249906	0.090009	0.0967896	0.485847	0.230892	0.297947	0.0631313	chr1	134479594	134481594	FHL2	4.58008	3.68636	1.25756	76.4793	3.99476	26.5241	138.362	2.5409	4.50338	129.901	4.59872	2.30356	5.54873	885.284	8.77773	2.24064	5.33892	22.8044	9.67099	0.85796	-0.00443878	0.985182
chr1	134633405	134634774	1.93149	3.81441	0.521191	0.50505	5.65833	0.102881	0.482993	0.288012	0.223502	0.360358	4.46388	0.656288	0.519871	0.550144	0.0668449	0.643443	0.197379	0.577351	1.35948	1.38889	chr1	134631919	134633919	NCK2	18.3415	7.60786	18.6691	12.7212	8.25783	16.357	20.2752	17.2295	35.3881	19.0925	6.14692	15.5135	11.3001	21.9696	22.1418	10.048	12.3678	15.076	14.1279	14.7721	-0.578281	0.00756492
chr1	135569196	135570311	0.354342	0.545271	0.156128	0.0757576	0.199223	0.15873	0	0.15873	0.144928	0	0.143215	0.358926	0.260542	0.0391926	0.0541126	0	0.428055	0.180914	0.131363	0.254125	chr1	135567606	135569606	LIMS1	11.5895	12.7077	17.9744	11.973	13.9383	14.7216	21.5377	15.181	24.1934	22.7255	12.3278	12.4835	7.16765	34.7909	7.76331	9.33648	15.5752	12.8171	11.9484	29.3418	-0.228793	0.331915
chr1	135634585	135635630	28.4821	1.56861	7.31884	3.89372	8.03629	0.702703	2.73333	14.9541	3.76707	16.9213	8.97487	1.72832	8.28143	3.38164	2.64423	4.93984	21.7711	0.596491	12.4529	2.54942	chr1	135633034	135635034	RANBP2	41.2834	27.0658	27.0329	21.7417	20.6893	15.2328	24.5811	25.8032	27.7459	16.6525	21.441	18.9306	15.5665	20.8084	19.285	16.2893	19.5108	20.0161	17.2776	35.6384	0.301531	0.196364
chr1	135925570	135926329	3.7037	0.459419	0.357143	0.84119	1.00275	1.70576	0.357143	1.62037	0.588235	0.867538	0.532213	1.21951	0.255102	0.669643	2.38095	0	0.704225	0.892857	2.15307	2.75024	chr1	135923769	135925769	SH3RF3	0.975053	0.306409	0.798868	1.92557	3.14186	1.19942	3.60449	0.7785	0.74664	6.09279	3.14621	3.09798	0.650065	0.905364	0.203836	3.80481	2.90014	2.87657	1.54932	2.0379	-0.276028	0.238792
chr1	136196682	136197854	7.92079	14.0604	7.00855	4.92882	22.3144	37.6504	1.75392	13.0826	9.70745	3.28058	0.308642	18.2878	1.82648	6.29877	3.04233	5.71429	0.75	0.147275	4.85223	10.4653	chr1	136194811	136196811	SOWAHC	1.94004	4.84808	8.71318	6.87968	10.1815	7.79305	5.19051	7.14903	12.5024	4.78508	14.6313	11.903	1.46833	3.20916	3.33972	3.32211	7.52256	12.9175	19.4998	14.9355	0.0707427	0.766946
chr1	136278698	136279459	0.0219587	0.0376036	0	0.029146	0.0341764	0	0.108466	0	0.78675	0	0.0305998	0.0179211	0.0520833	0.0229621	0.0517598	0.0407647	0	0.0854582	0.045356	0	chr1	136278220	136280220	CDC16	4.24986	3.49995	2.67933	3.04338	2.74963	1.99011	4.37495	2.92167	4.42145	2.38694	2.8413	3.00473	1.47883	3.33973	2.23166	1.42937	1.46225	2.89708	2.24704	4.62906	0.385109	0.0935897
chr1	136301169	136301591	0	0	0	0	0	0	0	0	0	0	0	0	0	0	0	0.297619	0	0	0	0	chr1	136300479	136302479	RASA3	11.2323	3.78407	18.9849	9.61116	4.9432	10.3211	9.62933	9.38225	25.7807	9.75234	5.27586	7.96616	1.46117	11.675	1.87845	1.07803	4.49821	8.86585	7.56266	10.603	-0.307571	0.187108
chr1	136801517	136801924	2.19219	0.0621375	0.582276	0.5	2.97435	0.377989	0.0857633	0.542301	0.369995	0.0925926	2.55393	0.343915	0.228701	0	0.112374	0.20696	0.279122	0.744165	0	0	chr1	136799887	136801887	GRTP1	18.9333	59.8682	8.557	17.9699	13.2806	9.79672	10.2677	18.9467	12.8702	8.84607	12.1744	14.9616	20.0623	27.2238	23.0224	15.7386	10.5916	15.974	14.2632	20.4368	-0.19401	0.412443
chr1	136801517	136801924	2.19219	0.0621375	0.582276	0.5	2.97435	0.377989	0.0857633	0.542301	0.369995	0.0925926	2.55393	0.343915	0.228701	0	0.112374	0.20696	0.279122	0.744165	0	0	chr1	136799887	136801887	LAMP1	112.76	291.023	47.5066	94.3333	53.624	59.0398	43.2093	95.8662	75.4541	53.8408	56.29	100.904	98.3243	105.955	130.604	95.8662	73.1223	72.56	58.7653	82.9706	-0.206231	0.383023
chr1	136887901	136889291	0	0	0.10929	0.0450045	0.262019	0	0	0	0.0652316	0	0.0657895	0	0	0	0.0422297	0.0454545	0	3.1746	0.0182749	0.510204	chr1	136886969	136888969	PCID2	22.1367	22.4341	11.6547	16.5624	10.7515	13.3345	17.2998	13.0143	18.4721	11.4486	11.112	10.4501	9.07332	15.0735	19.4287	7.14552	11.7236	11.3598	9.80402	13.3602	-0.152694	0.520429
chr1	137261803	137262500	0	0.0326797	0	0	0	0	0	0	0	0.133555	0	0	0	0	0	0.0240385	0	0.0689655	0.0917303	0	chr1	137259992	137261992	TUBGCP3	4.51046	4.67041	4.74401	3.52533	4.19892	3.25381	6.98334	4.5861	5.08783	3.69507	4.37604	3.82516	1.97558	5.17329	4.83443	6.75469	2.32591	3.28439	4.17156	4.92175	-0.123762	0.603171
chr1	137370528	137371662	3.01515	2.94372	4.34858	2.53465	2.91345	7.53102	1.18733	4.36508	2.44274	2.26418	1.48112	3.37975	2.63217	4.90922	0.772148	1.27598	1.72872	3.89919	1.09799	2.66106	chr1	137368990	137370990	MYO16	0.0882447	0.086812	0.0531847	0.0882449	2.84273	0.0173621	0.755637	0.0596566	0.205509	1.61791	3.81967	0.0842042	0.0643323	0.0078648	0.26443	0.0284522	0.633994	0.0751022	1.74593	0.0442209	-0.357869	0.12133
chr1	138246798	138248007	0.462891	1.69435	3.6252	0.502765	3.76992	1.92308	0.117816	4.34783	2.2973	0.186779	0.512821	1.10786	4.34852	0.568579	0	0.319407	2.14405	1.9246	0.260158	1.2117	chr1	138245359	138247359	COL4A2	43.7666	17.3497	21.4346	108.972	24.8379	152.22	202.874	72.6677	71.76	528.737	13.7058	79.438	43.7928	112.784	17.3994	35.0945	96.0476	77.8987	20.3333	15.676	-0.262517	0.263494
chr1	138537693	138546222	0.0449352	0.0691924	0.0509652	0	0.0888314	0.0495848	0.0263404	0.00914949	0.00940767	0.0424948	0.0196856	0.0432843	0.019126	0.0448934	0.00631313	0.00868055	0.0299286	0.468693	0.0186121	0.212461	chr1	138543412	138545412	ING1	12.694	16.6592	11.9342	7.15539	7.59017	13.1434	10.7457	10.343	18.8044	6.81016	5.81358	7.32718	11.2698	16.1431	24.3473	15.0813	16.4537	7.13262	6.93196	9.54565	-0.277377	0.236411
chr1	139471329	139472005	0	0.0512821	0	0	0	0	0	0	0	0	0	0	0	0	0	0	0	0	0	0	chr1	139469916	139471916	LIG4	4.81201	3.60014	0.938494	2.43107	2.74059	1.47976	3.16292	2.24815	3.12067	2.31866	2.47401	2.19938	1.30536	2.83588	1.5185	1.19793	2.1305	2.93941	1.48474	3.73577	0.281234	0.229687
chr1	139627173	139629368	0.707075	2.11933	0.662946	1.15131	0.813492	0	0.592873	4.329	7.04305	0.528181	0.861437	6.30901	4.88406	0.595726	0.720154	0.471371	0.766864	3.1771	5.45315	8.97321	chr1	139625973	139627973	ENSGALG00000026994	0	0	0	0	17.6272	0	2.70031	2.58415	0	2.78891	53.5821	7.5355	0	0	0	0	0	0	7.21553	0	-0.118294	0.619393
chr1	140311930	140313144	0.680272	0.125786	0	0.0272331	0.140056	0	0.105042	0	0.344828	0.0112613	0	0	0	0	0	0	0	0	0.111272	0.0821018	chr1	140310072	140312072	ARGLU1	69.9373	101.531	87.209	59.5708	100.751	75.6696	61.6628	45.9708	141.738	50.2914	85.8752	66.2058	97.2956	92.3616	250.224	63.5264	64.5542	67.2426	52.3699	68.3731	0.0346976	0.884534
chr1	140326285	140329961	14.2174	4.3808	8.56764	10.6183	8.93364	7.01638	3.37778	11.3402	5.50695	5.45081	8.67256	9.36329	9.28596	11.0388	5.62097	3.42044	4.54649	10.8446	7.04615	5.85171	chr1	140327175	140329175	EFNB2	11.88	5.08126	1.76998	6.71674	19.7151	5.12986	4.54718	9.59862	9.02432	7.57133	15.698	7.85383	4.13104	14.6746	17.493	4.01877	12.2212	7.09748	7.62588	7.64811	0.238768	0.310674
chr1	142222254	142225203	0	10.109	18.6782	6.75579	0.117096	1.6129	10.2453	13.2275	9.11029	15.614	9.73783	8.60215	6.84931	12.6984	19.7531	18.3486	15.5172	25.463	22.8448	4.8913	chr1	142221051	142223051	FGF14	0.139715	0	0.0279778	0.949486	25.0576	0.649012	0.27773	4.67795	0.173992	1.11776	29.4839	0.65695	0.165279	33.7017	0.219183	1.09551	0.0895562	4.6802	6.30298	3.40789	-0.122438	0.607082
chr1	143525028	143535090	14.0751	9.86954	13.4028	19.0907	15.9511	13.412	10.251	18.1167	18.7095	12.2599	20.3433	21.6021	16.0923	21.5996	11.5832	12.5688	12.0196	22.2287	10.9386	20.7085	chr1	143532165	143534165	ZIC2	0.256604	0	0	0.305467	5.41368	0	0.121232	0	0	0	7.13399	0.107045	0.259638	0	0	0	0	0.30755	3.0012	0	0.139361	0.557888
chr1	145357984	145359311	12.8484	2.39402	4.88889	6.9752	4.65368	5.96387	5.04261	5.44025	4.19312	12.3077	12.3571	10.809	4.25	6.24451	2.43902	9.98084	5.3	9.66667	8.16427	2.14652	chr1	145356348	145358348	ABCC4	6.50907	3.84029	10.1093	4.69804	9.29309	5.73801	6.09106	7.41512	5.95565	5.82713	14.0515	6.11543	2.80651	10.9088	2.92614	3.02668	9.20797	3.80851	9.82431	4.62838	0.249802	0.288159
chr1	152318688	152319844	0	0.0487329	0.0428571	0	0.0455337	0.0388166	0.0129232	0.0208594	0.0710532	0.0561798	0.0219587	0	0	0	0	0	0.0256016	0.0177683	0.0729927	0.0362319	chr1	152317263	152319263	RBM26	30.0689	22.9952	25.0697	15.6112	17.3834	14.8669	13.7315	12.5437	29.62	13.3036	16.0717	19.5077	13.1389	18.9686	19.5643	13.5777	17.1594	15.0695	12.9997	21.3707	0.14532	0.540998
chr1	152707168	152707829	1.04167	0	0.208333	0.254237	0	0	0	0.173611	0.387597	0	0	0	0	0	0	0	0	1.04167	0.169492	0.260417	chr1	152705237	152707237	RNF219	7.77941	26.1859	9.22685	10.0587	23.495	13.8216	21.9391	15.5026	34.7801	21.935	13.6321	11.7485	10.7244	17.3813	31.6602	13.3173	9.72752	13.2152	16.9045	12.5444	-0.233149	0.322536
chr1	153124814	153126154	8.94798	2.86487	16.9313	11.923	12.8954	2.70008	10.4017	11.5819	3.97712	4.3568	15.0406	13.5228	3.44683	4.65097	3.22639	3.48261	9.34419	4.48301	7.1638	15.2632	chr1	153123272	153125272	EDNRB	2.75527	18.4879	0.282662	3.37658	1.41074	3.93639	2.40219	1.73348	16.5424	2.13063	1.86698	1.73256	5.76331	11.2256	0.922878	1.11997	32.4847	0.897584	1.82047	1.13985	-0.254782	0.278335
chr1	154275238	154276308	0.710227	1.38613	1.47059	1.60101	0.588235	0.351732	0.309917	1.46104	3.01049	1.27273	0.15674	3.17573	0.378788	1.10925	0	0.553613	1.70455	1.51515	1.39799	5.14754	chr1	154273531	154275531	TBC1D4	40.615	3.04712	4.75347	13.9231	3.49154	13.7678	6.70613	8.6862	8.21688	12.518	3.44817	9.32874	4.23627	24.1057	16.4577	22.4264	5.62278	15.492	7.75519	13.6042	-0.0735236	0.758042
chr1	158266523	158267061	2.38707	1.02331	5.36211	2.30415	1.15959	1.96996	0.753427	7.9344	9.35914	0.63033	0.652448	5.25743	3.81914	2.62956	0.538193	1.45587	2.32672	3.17366	1.99152	2.5641	chr1	158265299	158267299	PCDH9	0.829114	0.069562	0.0897651	0.498027	26.8309	0.300888	0.490256	1.56421	0.151239	0.889072	32.5381	1.66714	4.94528	0.164184	0.0252813	1.90195	0.201566	0.311084	6.32929	2.26055	-0.274256	0.241944
chr1	165512960	165519970	4.86965	1.71381	17.2252	4.14419	18.28	2.15743	2.28858	12.3586	3.24215	3.1097	16.9464	8.54044	5.41712	5.06025	9.83072	7.45157	8.94191	6.41827	3.28114	7.3721	chr1	165511386	165513386	DGKH	2.19732	0.549116	2.55756	2.97341	4.6187	2.42178	1.90091	2.4408	3.36061	5.7018	8.22744	3.47323	0.527868	2.01673	1.16897	0.680953	2.70842	3.07264	5.84786	9.94451	0.257489	0.273082
chr1	166031195	166031746	0	0	1.21951	0.0404858	0.162602	0	0	0	0	0.0609756	0	0.142857	0	0.177442	0	0	0	0	0	0.0724638	chr1	166029301	166031301	DNAJC15	34.0561	24.8102	11.6454	19.6225	19.7004	14.3787	17.0767	10.7913	14.2818	10.9228	13.9908	9.21571	14.8996	58.9349	11.6105	10.4734	9.31209	8.11649	12.3429	8.63254	-0.00241515	0.991937
chr1	167078232	167078764	0.12987	0.0565611	0	0.0587689	10.1157	0	0	0	0.311526	0.103517	14.5536	0.219907	0	0.294591	0.135685	0.30802	0.320513	1.45455	0.749539	0.0816327	chr1	167076260	167078260	SLC25A30	139.607	10.5334	2.29656	42.1038	2.38817	3.49597	8.7938	3.3865	7.94433	6.85951	2.95303	6.94248	11.4823	26.446	21.258	1.84634	3.23564	4.29383	3.64649	3.15948	-0.150952	0.525254
chr1	167974039	167974691	0.0904941	0.0800947	0	0.0238095	0.116716	0	0.102881	0	0	0.0115048	0.00612745	0.077232	0.0828247	0.0137024	0.113379	0.0410299	0.0167968	0.0726744	0.0739473	0.0610732	chr1	167972122	167974122	NUDT15	2.72964	16.5597	2.40534	3.19543	2.25091	4.48056	2.71182	3.85462	2.68668	1.26439	3.34288	3.07505	8.23085	2.03356	6.79847	3.33795	2.28525	3.61218	2.13691	5.55902	0.30348	0.193344
chr1	168049664	168050849	2.73424	0.704568	12.4533	3.0303	0.994695	1.87033	1.60641	2.16248	1.64001	2.58621	0.694445	0.724638	0.65345	1.72414	0.698459	0.815217	6.40805	3.49928	0	0	chr1	168047958	168049958	RB1	6.09399	5.4214	7.85729	5.14371	3.33263	3.70685	6.13991	7.24746	6.05656	5.66793	3.93547	8.78253	3.46454	6.15564	23.9688	3.61482	22.2542	5.32871	5.42267	10.0168	0.200794	0.395963
chr1	168049664	168050849	2.73424	0.704568	12.4533	3.0303	0.994695	1.87033	1.60641	2.16248	1.64001	2.58621	0.694445	0.724638	0.65345	1.72414	0.698459	0.815217	6.40805	3.49928	0	0	chr1	168047958	168049958	ENSGALG00000016998	17.5241	7.9183	11.1059	12.5231	2.16517	7.93661	7.10475	34.6415	29.8908	11.4971	1.94222	33.5866	3.27438	8.582	6.49961	12.2393	26.187	14.0047	5.6106	18.7567	0.132167	0.578582
chr1	168295133	168296331	0.357656	0.0125755	0.116176	0.116959	0.443627	0.0891266	0	0	0.0533333	0	0.408685	0.209531	0.021164	0.238672	0.0428082	0	0	0.0307882	1.81058	0	chr1	168293302	168295302	FNDC3A	21.5139	45.6178	11.5201	13.2518	7.59468	11.5251	16.2543	15.3	23.4791	18.0368	9.31391	13.4186	11.0216	16.3012	57.2586	54.7267	14.1842	16.8116	13.4242	19.8662	-0.235279	0.318008
chr1	168409496	168410517	16.0606	12.6278	7.64526	7.05128	13.6667	34.1549	24.2217	16.1278	19.6869	12.2112	17.6691	0	13.964	17.3611	0	6.78295	19.4372	26.4706	12.7804	11.9048	chr1	168407609	168409609	MLNR	0.117408	0	0.157619	0.202666	0	0.265373	0.214046	0.0648307	0.223352	0.129396	0.139292	0	0	0	5.34167	0	0.0779564	0.267333	0.177115	0.357805	-0.373314	0.104964
chr1	170540422	170541456	0.0140056	0.297923	0	0	0	0	0.167854	0.980392	0.635752	0.0451041	0.0138889	0.0310239	0	0.103102	0.0252781	0.0247678	0.232876	0.0194818	0.0358805	0	chr1	170539029	170541029	PROSER1	6.63612	2.8364	2.762	2.68805	2.64318	1.82262	1.76121	2.26249	2.55091	2.22148	2.85205	3.35016	1.56145	2.30655	2.64821	2.52592	1.92908	2.48648	2.45983	3.91642	-0.166381	0.483255
chr1	171102022	171103865	9.25108	4.76448	7.96095	0.347222	2.47692	8.60737	2.46101	23.7168	6.92058	3.78132	1.57022	8.07435	2.88279	5.87151	0.969885	1.40937	8.71818	11.9809	7.12107	5.99947	chr1	171100507	171102507	TRPC4	0.0358996	0.0116364	0.00461862	0.163785	1.21399	0.121128	0.168055	0.102582	0.920665	0.0226374	1.02826	0.605705	0.029358	0.0708206	0.994674	0.0697412	0.0513193	0.349956	0.342717	0.103069	-0.262217	0.264061
chr1	171621436	171622020	0.0904977	0	0.183824	0.0363108	0.0631313	0	0	0	0	0.0297089	0.113693	0	0	0	0.0688705	0.0695705	0.235294	0	0.0111408	0.0677174	chr1	171619757	171621757	ALG5	2.97855	22.3948	7.93011	5.48454	7.01757	7.84755	14.5915	22.4188	11.2143	17.7331	7.46562	10.069	7.85565	3.60444	25.901	13.9332	10.893	10.0064	6.88278	14.3219	-0.132456	0.577746
chr1	172000446	172001805	0.862958	0.411072	7.10355	1.88338	0.384615	1.72414	0.958565	10.0529	2.56748	0.188734	0.302724	1.69559	0.932246	22.6867	0.950292	4.48708	0.882159	1.62332	1.97423	1.16782	chr1	171998622	172000622	DCLK1	0.165394	0	0.0787941	2.80108	86.468	0.277084	6.75067	0.138926	0.0722753	0.41006	82.0178	1.13124	0.0961444	0.802315	4.38347	0.117593	6.89124	0.203767	16.5676	0.452679	-0.2061	0.383331
chr1	173762547	173763054	0.111111	0.0591017	0	0	0	0	0	0	0	0	0	0.217865	0	0	0.240385	0	0.555556	0	0.031348	0	chr1	173760553	173762553	N4BP2L2	21.4909	9.95717	8.23552	10.001	5.07174	7.31304	5.30335	7.45228	9.62234	5.36102	5.53329	4.90766	5.72626	12.8846	8.58323	4.94975	8.88543	7.11504	6.25515	7.97588	0.137246	0.563937
chr1	173857080	173860359	19.43	8.16143	10.5485	21.0475	19.642	22.401	15.1665	15.4318	14.4104	11.5214	20.8166	20.3763	9.99445	16.2268	6.92333	5.55873	10.8157	15.3728	15.6618	14.0599	chr1	173857595	173859595	ZAR1	0.807523	0	0	0.241564	1.10234	0	17.0935	0.23515	1.87153	0.620635	0.519445	0	0.206226	0	0.748646	2.87589	0.300691	0.122475	0.315403	0.218654	-0.0386349	0.87153
chr1	173857080	173860359	19.43	8.16143	10.5485	21.0475	19.642	22.401	15.1665	15.4318	14.4104	11.5214	20.8166	20.3763	9.99445	16.2268	6.92333	5.55873	10.8157	15.3728	15.6618	14.0599	chr1	173860150	173862150	FRY	42.7101	3.7249	4.00283	12.601	21.3204	9.3426	3.81818	8.2065	9.52715	10.2965	20.0865	4.74041	3.25812	24.553	1.97134	2.12551	5.67568	7.78176	12.6797	12.317	0.556351	0.0108487
chr1	174487592	174488790	0.0726744	1.83712	0.0757576	0.170068	0.0637959	0	0.105988	0	0.294118	0.208941	0.0437063	1.33333	0.0465116	0.0833333	0	0	0.0815994	0	0	0	chr1	174486125	174488125	KATNAL1	1.10367	0.992785	2.23054	2.0851	10.8069	1.32222	1.75583	1.76168	1.94466	2.83312	8.31158	3.08062	1.8546	2.32883	2.39203	0.555551	1.59313	3.67453	2.53557	3.74801	-0.142805	0.548098
chr1	174587053	174588621	0	0.0274725	0	0.0628931	0	0	0	0	0	0	0	0	0	0	0	0.328947	0	0	0	0	chr1	174585620	174587620	UBL3	40.5863	30.3256	9.0735	22.1653	29.0803	12.6482	16.0588	19.0185	29.8671	14.3427	27.8108	15.5766	10.4182	30.2925	6.63801	10.1397	9.4141	15.5897	16.4154	32.5001	-0.20362	0.389207
chr1	175084279	175085467	0.37594	1.38312	4.97988	0.790703	2.75758	1.46572	1.18012	1.98413	2.71699	0.666132	1.4245	0.413712	1.19048	2.60652	2.40964	0.34204	1.28205	2.77778	1.75589	4.31235	chr1	175082525	175084525	FLT1	5.82659	2.61462	1.34685	6.1131	7.49433	2.99892	4.12997	5.34992	6.30892	4.20499	6.39808	8.09298	3.61561	16.6796	1.88261	1.70924	3.04865	3.27995	5.06109	3.43043	-0.0425851	0.858516
chr1	175328330	175333376	24.4377	27.404	44.4418	29.7924	18.769	17.5074	18.8519	36.5163	25.0926	23.0707	31.917	26.9344	39.5504	15.2884	23.3213	3.71266	29.5018	43.7081	27.9407	29.3981	chr1	175327113	175329113	PDX1	0	1.42921	0	0	0	12.047	0	0.161504	0	0	0	0.512623	4.06676	0	0	35.3886	0	0	0	0	-0.576881	0.00774671
chr1	175566212	175567703	28.9214	24.6584	31.3219	30.0361	27.4992	24.3088	31.0738	31.9684	14.1043	23.5653	28.8877	34.9799	33.9416	34.9534	28.4476	28.947	38.0949	39.8387	35.3757	31.5108	chr1	175566189	175568189	RPL21	175.623	251.251	179.711	194.462	98.9127	297.314	271.311	179.822	308.088	177.804	88.3293	124.734	193.47	270.78	291.791	306.469	138.581	192.99	107.621	136.284	-0.433348	0.0562977
chr1	175566212	175567703	28.9214	24.6584	31.3219	30.0361	27.4992	24.3088	31.0738	31.9684	14.1043	23.5653	28.8877	34.9799	33.9416	34.9534	28.4476	28.947	38.0949	39.8387	35.3757	31.5108	chr1	175566189	175568189	SNORA27	331.983	713.699	1485.83	4525.27	1882.92	173.183	591.225	9063.28	1832.89	0	4827.7	814.887	205.817	183.514	3478.82	13602.2	0	271.218	0	742.214	-0.102258	0.667928
chr1	175735105	175736260	3.11404	5.19641	9.53354	4.16667	6.79612	3.20537	4.11934	4.70208	16.1286	1.42857	2.44916	0	6.92255	7.37705	1.95565	6.19048	10.034	10.9649	1.4881	28	chr1	175733378	175735378	GPR12	0	0	0	0.146477	4.45863	0.327751	2.48514	0	0.0686016	0	4.74807	0.116959	0	0.140534	0	0.483371	0	0.108088	1.16302	0	-0.19042	0.421311
chr1	178185515	178186448	1.74977	1.38227	3.14655	1.90945	1.8554	1.36364	1.30009	1.65441	3.08733	1.1737	4.98636	1.77038	0.825304	2.39699	0.671629	0.447653	2.79962	3.91985	4.22548	4.02462	chr1	178183723	178185723	ENSGALG00000022720,GJB6	13.027	1.07732	0.186265	5.17282	0.480223	3.06043	1.38261	52.2042	0.0655059	0.529196	0.523093	2.43823	27.4925	1.07733	8.49326	0.682398	1.76603	5.16779	9.4339	7.87862	-0.176507	0.456629
chr1	178403611	178405491	0.0559056	0.0626702	0	0.00957029	0.00812216	0.408163	0.00682314	0	0.564972	0.018463	0.0999842	0.143207	0.0261238	0.154368	0.0141004	0.0775799	0	0	0.114227	0.0257977	chr1	178402299	178404299	PSPC1	24.1181	26.2483	34.9266	21.3263	34.7256	17.6383	30.7787	23.2058	33.7832	19.7984	27.5432	25.1688	14.3802	24.71	19.3764	12.5461	23.272	19.8968	20.9749	37.6577	0.0756866	0.751136
chr1	178532817	178533541	0	0.0231481	0.0246914	0	0.0331565	0.0369458	0	0	0.151515	0	0.0319285	0	0	0	0.0677507	0	0	0.0382702	0	0	chr1	178531779	178533779	CENPJ	0.0355691	0.064987	1.07148	0.0762666	0.0812259	0.0894341	1.38819	0.19616	0.355669	0.175874	0.0838265	0.29127	0.123676	0.0452667	0.0724045	0.112991	0.166899	0.212347	0.0710675	0.335681	0.00279193	0.990679
chr1	179878019	179878660	0.02331	0.0932401	0	0	0.0606061	0	0.204082	0.0710248	0.0227118	0.0966184	0.0505051	0	0.0865052	0.25641	0.0644745	0	0	0	0	0	chr1	179876274	179878274	CWF19L2	2.1601	5.34657	3.60737	1.85711	3.53752	3.25096	4.49601	3.16623	5.59637	2.96516	3.12899	2.82472	2.47902	3.97044	2.46601	2.98423	2.41463	3.26821	2.03705	3.10422	0.39871	0.0816269
chr1	180354486	180355656	0.10693	0.0218126	0	0.00964506	0.0230178	0.0117827	0.0284604	0.0880282	0	0.0423543	0	0.0661294	0.0755177	0.0288535	0.0131182	0.0426793	0.066692	0.0863785	0.053817	0	chr1	180353190	180355190	KBTBD3	0.217192	0.231628	0.25348	0.197256	6.01085	0.218694	0.131529	0.132835	0.475449	0.147887	4.95814	0.194254	0.209766	0.82732	0.206706	0.116902	0.175781	0.152134	1.69412	0.336312	-0.265259	0.258356
chr1	180373922	180374901	0.0446429	0	0.0755248	0.287879	0.188197	0.0328078	0.0337721	0.256862	0.0407997	0	0.0165426	0.281085	0.0152625	0	0.2442	0	0.485551	0.149545	1.0989	0	chr1	180372422	180374422	MSANTD4	5.19993	5.59348	4.96533	5.05312	5.6198	5.37155	9.10112	4.56901	7.1685	7.31664	6.74076	4.42955	4.47027	8.928	4.29913	4.09207	6.31802	5.49582	4.77776	6.08397	-0.297874	0.202114
chr1	181148947	181150155	0	3.21368	4.75746	13.9344	0.37642	0.510204	0.0941176	2.08849	4.30298	0	0.438963	6.54762	3.70054	2.58621	0.961956	0	1.30435	6.86224	0	4.16667	chr1	181147245	181149245	PDGFD	7.82977	0.391072	2.94776	38.666	2.52592	39.8801	10.3627	52.8207	2.54857	12.6218	1.99987	23.5067	1.88101	36.4938	8.43049	3.757	14.1444	34.6069	10.1366	26.8688	0.382424	0.0960961
chr1	181588805	181590109	0	0.125427	1.25661	0.463981	0.287356	0.185185	0.925926	1.2963	1.22164	0.330578	0.231481	1.2037	0.350877	0.401606	0.657895	0.114548	0.694444	0	5.64516	1.43678	chr1	181587421	181589421	DCUN1D5	13.3501	19.0947	6.53885	9.51953	14.8058	6.97767	14.8034	8.65398	10.9164	7.02711	12.1568	6.34125	5.83416	7.57244	6.60806	8.06805	8.50882	7.85886	4.17383	5.87887	-0.400591	0.0800661
chr1	181958149	181960745	0.657895	0	2.22222	0.631313	2.53398	0.490196	0	0.246914	0.619959	1.04167	0.40404	0.657895	3.06667	0	0	1.20968	0	1.96078	1.82073	0.659649	chr1	181957694	181959694	C1H11ORF70	0	0.110752	0	0.288189	2.49794	0.067126	0.413459	0.37659	0.200203	0.28486	3.20565	0.211899	0.569838	0.0991813	1.9664	0	0.508243	0.258089	0.279246	0.724853	0.0473698	0.842799
chr1	182261033	182261870	2.18487	4.18976	4.15588	2.64286	1.22087	0.34632	0.0754148	3.16742	2.31757	0.70028	5.78125	5.32213	0.15083	4.41176	1.48462	0	0.301659	0.621919	0	0	chr1	182259069	182261069	TRPC6	0.434095	0.282505	0.541156	1.74969	0.994849	0.737007	0.676667	1.28992	0.599916	2.66669	0.928602	0.714057	0.661722	0.466281	0.483203	0.642953	2.38699	1.3467	1.15496	1.15384	-0.314877	0.176312
chr1	184502494	184504158	2.94118	0.742574	0	1.29573	0.137363	0.769231	0.854701	0	0.942529	0.0633513	2.3569	0.0874126	1.17647	0	0	0	0	0	1.16279	0	chr1	184501530	184503530	FAM76B	2.72526	1.85626	3.66658	2.12171	2.17598	2.04684	4.24381	3.0481	4.02646	2.68541	1.94057	2.41013	2.39832	2.98747	2.24417	1.94833	2.25248	2.76682	2.69552	4.8355	-0.160798	0.498255
chr1	184655144	184656048	2.60613	5.19848	11.1261	1.80835	4.06454	2.14099	7.28282	4.47138	4.0353	4.17551	4.08911	8.36554	5.47578	4.9783	0.958869	3.32993	11.39	4.0581	3.21134	8.88981	chr1	184654627	184656627	SESN3	11.4779	21.0811	16.574	12.367	46.1555	14.5158	13.5609	28.5956	31.5775	17.8991	51.2462	22.4163	6.89564	21.9328	28.0424	6.13164	8.40342	25.4336	31.6203	28.0649	-0.181435	0.443948
chr1	184726524	184727142	0.416667	0	0	0	0	0	0	0	0	0	0.0956938	0	0	0	0	0	0	0	0	0	chr1	184724696	184726696	CWC15	95.1568	62.3239	47.3461	59.096	60.9855	79.242	72.3397	51.5478	46.2893	34.8763	35.6861	28.7756	49.3532	117.14	49.2317	42.2585	50.5829	42.7777	29.3543	22.318	0.37261	0.105673
chr1	184880440	184881178	0	0.252135	0.0537634	0	0	0	0	0	0	0	0.476191	0	0.0324675	0.0516529	0	0	0	0	0	0	chr1	184878831	184880831	MRE11A	3.04199	4.22398	3.57865	2.39892	2.87686	4.07103	6.47228	4.16374	5.2644	3.07804	2.61777	3.2203	2.21805	3.75611	3.74583	4.59384	2.72709	3.52828	2.22522	4.27243	-0.148321	0.532581
chr1	185050237	185051361	5.88235	6.59274	0	0	3.07692	0	0	4.28571	1.07914	6.66667	0	0	0	6.14035	7.54717	12.069	3.77358	9.09091	16.6667	1.99005	chr1	185048704	185050704	C1H11ORF54	3.91463	118.085	4.1634	3.94718	2.59452	9.72364	7.6139	3.87097	7.04918	3.54464	3.9126	12.244	57.2233	6.38039	11.0573	16.7529	3.93142	5.82886	2.79307	4.69831	0.0326371	0.891351
chr1	185059384	185060711	0.052132	0	0.433895	0.0873961	0.250787	0.211864	0.0484848	0.0632111	0	0.109663	0.051321	0.0797979	0.489352	1.05535	0.209428	0.0533109	0.808603	0.245343	0.191684	0.588712	chr1	185058351	185060351	SNORA18,SNORA40,SNORA8,TAF1D	382.381	697.808	22.5328	14.2318	657.19	5209.59	18.3974	29.5999	3996.9	6599.39	8.4446	2623.37	4684.67	7932.45	7772.28	15.7548	5729.76	8947.87	4405.86	9639.43	0.556103	0.0108915
chr1	185059384	185060711	0.052132	0	0.433895	0.0873961	0.250787	0.211864	0.0484848	0.0632111	0	0.109663	0.051321	0.0797979	0.489352	1.05535	0.209428	0.0533109	0.808603	0.245343	0.191684	0.588712	chr1	185058351	185060351	SNORA1	0	268.619	5423.15	784.259	1884	175.379	348.536	3154.38	6503.55	25209.2	2437.74	1662.74	102.599	883.865	18500.9	12875.3	1390.01	120.54	2442.27	0	-0.209519	0.375315
chr1	185059384	185060711	0.052132	0	0.433895	0.0873961	0.250787	0.211864	0.0484848	0.0632111	0	0.109663	0.051321	0.0797979	0.489352	1.05535	0.209428	0.0533109	0.808603	0.245343	0.191684	0.588712	chr1	185058351	185060351	SNORA32	0	0	0	0	0	0	0	0	0	10798.8	0	0	0	0	0	0	3229.52	0	0	0	0.0197289	0.934204
chr1	185059384	185060711	0.052132	0	0.433895	0.0873961	0.250787	0.211864	0.0484848	0.0632111	0	0.109663	0.051321	0.0797979	0.489352	1.05535	0.209428	0.0533109	0.808603	0.245343	0.191684	0.588712	chr1	185058351	185060351	SNORA25	384.704	0	10099.4	7276.01	0	1907.97	368.572	9174.81	6343.24	18575.7	3242.21	5583.79	3234.08	918.068	23334.8	9963.53	1977.9	1741.42	7785.31	2346.04	-0.210127	0.373899
chr1	185059384	185060711	0.052132	0	0.433895	0.0873961	0.250787	0.211864	0.0484848	0.0632111	0	0.109663	0.051321	0.0797979	0.489352	1.05535	0.209428	0.0533109	0.808603	0.245343	0.191684	0.588712	chr1	185058351	185060351	CEP295	6.96828	2.98224	8.46337	3.13654	3.42045	3.65865	9.08203	3.42208	6.95781	6.01164	3.20825	3.70184	11.0448	3.9401	4.17199	3.92667	5.34987	2.63498	3.20601	4.57971	0.119142	0.616863
chr1	186948456	186949093	1.04167	3.51307	4.95868	1.28924	1.07143	0	0.192308	0.454545	8.10256	0.11281	0	3.68852	0	0.277778	0.520833	0	0.284091	9.57447	2.36806	2.30171	chr1	186946731	186948731	NOX4	3.11837	0.655248	0.339386	5.78197	0.819982	2.56141	3.87846	2.37291	0.966338	17.8319	1.04353	3.39336	10.43	12.5726	0.33685	0.901459	2.73588	2.98738	3.72778	4.54414	-0.289035	0.216472
chr1	189457717	189458335	0.584795	0.027571	0	0	0.0373274	0	0.0738303	0	0	0	0	0	0.0313283	0	0	0.0358038	0.160256	0	0	0	chr1	189456156	189458156	TMEM126A	9.99965	10.1509	5.3429	6.44751	10.1144	7.00185	7.80239	3.36215	8.04454	4.37232	7.48608	5.079	7.49627	15.0533	5.66459	6.08225	3.93834	4.51352	3.91607	5.89651	0.227785	0.334108
chr1	189469786	189471307	1.38516	0.246618	1.51719	0.80516	1.07966	3.49206	1.25365	2.77778	1.85185	0.841456	0.780936	0.760553	1.39894	2.00074	2.02778	1.47918	0.755453	3.45638	1.58771	1.23366	chr1	189471150	189473150	CCDC89	0	0	0.0379066	0	0.0584861	0.336831	0.0559459	0.0628305	0.0268412	0.0897244	0.0709049	0.0851611	0	0	3.45167	0.138796	0.430954	0	0	0.0379673	0.146706	0.537105
chr1	192049990	192050535	0	0.0784422	0	0.0980392	0	0	0	0	0	0.0363108	0.0666667	0.242594	0	0.0740741	0	0.13859	0.0597372	0.15	0.0304321	0.058548	chr1	192048372	192050372	ALG8	1.84743	4.4878	7.14184	3.02878	3.86525	3.43119	7.6689	4.57277	5.47195	3.54693	3.88002	3.6366	3.32024	3.29945	10.4597	3.52414	2.25523	3.38029	2.10358	4.33722	-0.30803	0.186417
chr1	192065641	192071050	4.60782	6.86878	16.0549	6.82787	12.9685	13.2474	10.2899	19.2848	18.9672	6.47208	8.00982	20.0568	11.7238	13.4782	7.7644	11.4443	12.6045	11.8447	10.2231	14.2157	chr1	192068044	192070044	THRSPB	0	213.658	2.39366	5.5614	0	8.03681	5.86738	3.25482	0.702228	0.59141	0.319001	4.03675	1.96494	1.08681	1.6605	0	2.87284	14.5649	1.85677	1.59287	-0.258137	0.271835
chr1	193361293	193367396	47.1981	46.2185	74.0122	57.749	47.4739	48.5034	49.0898	64.3071	53.623	48.0799	55.2637	49.2617	56.4388	62.8956	42.4062	53.4792	60.352	65.7313	52.1774	57.2288	chr1	193359964	193361964	ENSGALG00000017493	0.388585	0.995538	5.11121	1.06303	1.27219	3.02392	10.7914	1.10001	2.96976	3.63817	1.31427	3.99957	1.96463	0.577123	2.83267	1.08307	1.23594	2.33533	1.25049	0.746628	-0.0738679	0.756942
chr1	193361293	193367396	47.1981	46.2185	74.0122	57.749	47.4739	48.5034	49.0898	64.3071	53.623	48.0799	55.2637	49.2617	56.4388	62.8956	42.4062	53.4792	60.352	65.7313	52.1774	57.2288	chr1	193363337	193365337	NUMA1	34.2705	12.3636	54.1018	24.3775	14.4753	25.194	20.1761	18.0949	16.1236	13.2414	12.7857	22.787	10.7494	18.1105	21.0518	21.7509	19.3072	20.4862	19.9018	8.64172	0.388298	0.0906761
chr1	193528724	193529545	0.142287	0.665788	0.150676	0.0635997	0.0755358	0.0619862	0.0612489	0.365217	0.032075	0.121136	0.181421	0.214398	0.0997908	0.190368	0.208986	0.172	0.179377	0.337902	0.201241	0.221883	chr1	193527876	193529876	TPP1	44.6078	195.947	102.306	109.02	51.2364	86.0463	82.5891	76.0766	85.0911	94.9034	52.0957	149.589	315.125	153.751	291.397	201.954	114.266	89.2554	92.864	22.5663	0.171203	0.47048
chr1	193789205	193796702	67.8811	67.3894	73.4172	62.3615	68.5376	57.6475	65.8038	61.3145	72.7005	62.015	67.6562	68.2238	57.4969	62.8555	67.0188	65.5461	65.9331	59.1969	66.9078	61.1683	chr1	193791714	193793714	STIM1	12.8411	21.3851	27.6861	13.0672	10.7451	12.6502	15.3062	22.4103	14.5471	9.93868	10.0556	19.9446	8.41645	6.44881	21.5373	9.60465	18.3477	13.7872	15.419	8.43094	0.471565	0.0358161
chr1	193866855	193868033	0.320513	0.0710227	0	0	0	0.0159847	0.0571429	0.0183655	0.0153563	0	0	0	0.078125	0	0.315934	0	0	0	0	0	chr1	193865727	193867727	ENSGALG00000013552	23.067	14.4045	18.4692	17.0474	9.41907	11.9468	29.9886	18.8677	24.1261	11.324	10.3369	13.7733	12.1302	23.4056	13.9831	11.5066	35.2066	14.3161	14.4574	15.7217	0.0855262	0.719958
chr1	194007026	194008206	4.48718	6.64683	12.0513	2.28299	2.23214	5.38462	1.21212	0.617284	6.59722	2.46954	3.44551	3.73377	3.98352	4.67572	0	1.85634	5.12821	3.06513	3.70862	3.15398	chr1	194005273	194007273	MAP6	0.140066	0	0.126587	0.188422	30.5742	0.512843	0.816844	0.248137	0.0440116	0.435137	29.5361	0.15289	0	0	0	0.295511	0.345223	0.134992	9.36529	1.17179	-0.139551	0.557346
chr1	194503329	194508660	54.6321	52.3045	82.9317	42.4607	52.9266	50.7163	49.9178	59.509	56.6548	58.1749	58.5468	67.9368	62.0606	72.0786	58.3201	69.2411	70.0964	56.3192	54.8593	66.4918	chr1	194501338	194503338	ARHGEF17	9.2599	0.285221	1.50437	5.72065	61.1528	2.58089	6.44597	4.08734	1.52947	17.5001	63.4777	6.9196	1.11417	3.34811	0.525522	1.67605	2.07257	8.22272	8.00894	3.24906	-0.200337	0.397063
chr1	194925841	194926469	76.9581	53.3333	86.8518	85.6603	85.4121	86.25	83.9164	85.7991	42.1053	82.6913	79.5084	82.784	84.3162	81.8325	75.1639	75.8427	88.5149	85.6557	68.2734	84.358	chr1	194926458	194928458	SPCS2	43.1956	226.606	69.9221	65.1037	75.2206	70.2196	74.1215	77.8713	79.0544	76.375	80.3659	82.9848	89.2225	87.0771	260.402	196.283	68.8516	56.0777	54.4464	23.8248	-0.378908	0.0994506
chr1	194983579	194984040	9.58333	16.9756	12.6667	10.2652	28	7.5	11.413	5.83333	15.942	7.09244	26.6443	14.1292	10.119	7.88739	11.25	8.52328	11.5	13.6667	7.21513	12.0493	chr1	194981809	194983809	CHRDL2	0.79734	0.148271	0	0.574081	0.516248	0.560947	0.202329	0.062817	0.0487494	0.0518713	0.752648	0.0945382	0.131651	0	0.64423	0.109347	0.0636721	7.35488	0.774131	0.23309	0.0901522	0.705442
chr1	195086037	195086533	0	0.180776	0.114943	0	0.1001	0.125023	0.0759013	0	0.162065	0.0529101	0.0308642	0.0759878	0.686499	0.0651042	0	0	0	0.067854	0.174216	0	chr1	195084218	195086218	PGM2L1	44.4362	2.63039	6.98694	15.0971	79.272	5.18742	9.21894	2.84256	3.95458	3.55373	87.326	5.31639	0.943514	3.51536	6.05134	3.37829	4.05974	3.04932	7.62985	3.1976	-0.158434	0.504676
chr1	195086037	195086533	0	0.180776	0.114943	0	0.1001	0.125023	0.0759013	0	0.162065	0.0529101	0.0308642	0.0759878	0.686499	0.0651042	0	0	0	0.067854	0.174216	0	chr1	195084218	195086218	ENSGALG00000022694	18.9745	1.60507	3.3603	7.11165	36.734	2.44381	4.15107	1.2481	3.31523	0.458096	37.219	2.03721	0.571772	1.33652	1.64442	3.45604	1.82252	1.28378	3.6936	2.69945	-0.152157	0.521915
chr10	349793	351039	0	0.272109	3.26797	0.718391	0	0	3.45805	0	1.61147	6.43467	8.09942	0	0.909091	0	0	0	1.96078	0	0.883513	0.689655	chr10	350189	352189	SHF	29.6931	0.988621	2.8907	9.24195	7.32043	7.84767	5.49085	3.17495	1.99209	2.73795	8.93882	3.71983	1.72056	15.3236	2.65179	2.883	1.73959	3.36945	8.22983	1.56322	-0.104711	0.660415
chr10	379393	380946	1.56794	1.06322	0.334821	0.993429	3.13194	0.296443	0.731061	1.72014	1.52692	3.21291	1.35684	0.281426	1.20192	1.41071	0	1.44231	3.08004	2.27273	2.0826	1.13392	chr10	378305	380305	ENSGALG00000002522	70.3036	0.60166	0.0980167	32.4308	0.0999143	0.156371	0.146847	0.152297	0.0769731	0.0530724	0.0893468	0.175435	0.410256	11.9092	0.289608	0.346799	0.0485364	0.548671	1.75915	0.0440162	-0.0180622	0.939752
chr10	379393	380946	1.56794	1.06322	0.334821	0.993429	3.13194	0.296443	0.731061	1.72014	1.52692	3.21291	1.35684	0.281426	1.20192	1.41071	0	1.44231	3.08004	2.27273	2.0826	1.13392	chr10	378305	380305	ALPK3	577.467	0.88433	0.199115	186.386	0.663551	0.340532	0.911546	0.572314	0.542632	0.366557	0.351946	0.26302	0.674034	95.9575	0.784419	0.848573	0.684648	3.83495	12.2221	0.121791	-0.00129203	0.995687
chr10	520284	521194	24.1418	13.9829	13.9576	13.1129	25.2024	10.1307	13.3408	17.7219	19.8869	35.2268	24.2907	19.56	12.9248	27.8958	12.8106	12.2471	10.7026	18.1667	23.4654	20.4441	chr10	518506	520506	NMB	0.236365	0.56993	0.636762	0.715449	13.3618	1.71973	3.65794	8.8549	2.4336	0.743953	10.5779	0.22163	1.28351	0.848261	0	0	0.28776	1.09206	0.868194	5.27131	0.274037	0.242335
chr10	714814	718385	0.208333	1.54766	0.939907	0.925926	4.66345	1.9915	0.351608	7.55352	2.65069	1.44928	7.97337	4.43137	0.364855	3.2395	0.195302	4.03333	2.02122	4.01743	6.80272	1.31944	chr10	713178	715178	CSNK1G1	7.17272	6.00674	7.42977	5.58421	10.4281	6.62393	18.2616	6.35795	8.6857	8.36138	11.3423	7.78515	5.88148	5.13284	18.6711	12.6511	11.0993	6.26871	6.54532	6.6442	-0.153158	0.519148
chr10	806520	807293	16.3539	7.93766	46.3834	15.1866	27.4755	18.9048	20.8173	23.5179	15.4206	23.0972	25.0457	19.6305	20.6877	33.8622	17.1923	13.8589	35.9246	13.5599	29.3218	32.9004	chr10	805510	807510	SNX1,SNX22	18.5039	43.2274	40.1634	27.4972	16.0039	19.2977	93.8024	45.6504	38.0953	33.6949	14.8147	33.9137	33.1585	31.3565	40.9777	38.2917	49.2056	35.7243	21.6353	26.2578	-0.0445808	0.851954
chr10	820008	820578	0.0759878	0.0992063	0	0.0641026	0.0714286	0	0	0	0	0	0.106838	0.0254647	0	0.178571	0	0.0282805	0.127551	0	0.140321	0	chr10	819409	821409	PATL2	0.562271	0.859566	7.31268	0.566919	0.0615686	0.710493	4.44237	1.27121	3.98406	1.06573	0.103704	1.02816	0.945537	1.13566	0.606722	0.67355	2.54031	1.30743	0.414041	0.260372	-0.283178	0.226347
chr10	827399	828561	13.1688	7.79121	0.81348	31.5836	30.1329	30.7983	15.9119	10.209	0.940037	0	15.3052	3.19149	8.7728	13.2616	17.4886	21.3243	0.524922	11.318	23.1707	5.94937	chr10	825707	827707	B2M	306.775	807.543	1314.48	729.411	64.5177	311.314	366.851	1214.65	920.2	255.549	64.7605	766.615	1183.66	579.467	201.918	104.02	1321.59	1209.83	323.851	358.761	-0.532326	0.0156842
chr10	835770	837332	0.857911	1.27957	0.934063	1.00678	1.82718	1.35281	1.7089	1.40621	0.789559	0.191813	0.869943	0.690583	0.829356	0.248285	0.0844036	0.288711	0.348324	0.672274	0.252175	1.94175	chr10	834911	836911	ENSGALG00000002150	0.215436	0.152226	0.536532	0.680005	9.11061	0.549996	4.95056	0.83416	0.892362	0.801414	8.17488	1.01388	0.586037	0.379459	2.10969	0.947391	0.804262	1.15657	2.73433	1.13011	0.331209	0.153732
chr10	1063599	1066266	7.49411	2.60348	7.47433	2.37996	4.27655	3.67521	1.76606	2.13235	5.12425	1.84061	4.82773	4.90206	1.83035	7.60846	1.14462	1.63488	4.18153	3.67929	5.36015	3.56877	chr10	1062651	1064651	SENP8	25.7521	6.61664	3.76868	11.5225	4.16224	5.87244	2.51544	3.74892	7.3522	1.25125	5.68688	3.62804	5.76055	5.90003	10.7416	7.46687	3.33397	2.00703	3.80235	2.50823	0.268462	0.252434
chr10	1105840	1119216	62.1414	63.7463	76.2939	62.9234	56.3545	57.8994	60.2455	64.7531	60.6815	56.5902	63.1844	68.3946	58.6121	68.1691	59.6341	56.043	72.9072	71.0098	60.7237	70.7704	chr10	1105486	1107486	ENSGALG00000001966	1.98949	0.684871	0.337511	1.42507	51.9065	1.59243	1.11866	1.39314	0.876462	0.908222	54.5411	0.94253	0.618909	0.866451	0.94694	0.67958	0.973305	1.70482	5.24731	1.1599	-0.223219	0.344148
chr10	1105840	1119216	62.1414	63.7463	76.2939	62.9234	56.3545	57.8994	60.2455	64.7531	60.6815	56.5902	63.1844	68.3946	58.6121	68.1691	59.6341	56.043	72.9072	71.0098	60.7237	70.7704	chr10	1117691	1119691	HEXA	2.07185	8.63618	24.0539	11.5911	16.6906	7.69057	10.1975	19.5884	10.1719	18.501	16.7003	23.7184	21.1657	3.70322	14.0917	6.8741	7.72183	11.7018	12.4136	9.05644	0.0986021	0.679182
chr10	1136383	1136860	0	0	0	0.0438597	0	0	0	0	0	0.131579	0.219298	0	0	0	0	0	0	0	0	0	chr10	1135351	1137351	ARIH1	72.4232	15.9979	26.2418	24.6558	16.3419	21.3888	14.5368	20.1957	11.5925	9.90742	18.3727	14.9878	13.727	23.1207	11.2449	11.2784	15.093	16.3253	17.3637	27.3283	-0.107485	0.651955
chr10	1186031	1186722	0.120773	0.195312	0	0.0544662	0	0	0	0	0	0.112961	0.163399	0.0603865	0	0.0544662	0	0	0	0	0.063857	0	chr10	1184435	1186435	BBS4	1.24146	5.75839	6.86956	6.03308	15.3408	6.92199	8.22339	8.26651	3.98344	5.26811	13.4872	7.55506	6.24743	3.96472	18.6205	3.61993	4.06254	8.30823	14.4272	5.74871	-0.0691881	0.771937
chr10	1186031	1186722	0.120773	0.195312	0	0.0544662	0	0	0	0	0	0.112961	0.163399	0.0603865	0	0.0544662	0	0	0	0	0.063857	0	chr10	1184435	1186435	ADPGK	3.36905	5.89153	4.38665	8.56407	4.64323	5.65698	13.4784	10.3481	8.78107	7.73004	5.50245	7.30008	7.64264	8.87218	8.02699	4.96221	13.7286	7.1072	8.08134	7.36899	-0.32094	0.167681
chr10	1670424	1670996	30.2972	30.2514	58.955	37.5264	40.8174	62.916	38.6379	44.0108	43.356	40.0197	38.1808	39.0579	46.8799	48.0508	36.0686	33.7213	60.1813	41.3616	39.1981	47.5208	chr10	1668535	1670535	REC114	0	0.188427	0.123979	0.0901438	0.339958	0	0.071595	0	0	0.187593	0.301003	0	0.15473	0.188952	0	0	0.110913	0.175385	0.0773371	0	-0.0437337	0.854738
chr10	1891713	1892715	0.188856	0.0289352	0.0812538	0.1	0.94476	0.0962485	0.16369	0.0170503	0	0.162177	0.0420875	0.166391	0.183938	0.0236127	0.164492	0.0286041	0.0507743	0.115513	0.273457	0.0582751	chr10	1889956	1891956	COX5A	44.3518	77.41	19.1886	30.4821	28.4622	25.5948	26.3095	7.40082	13.732	29.6407	15.8815	38.4007	31.8911	130.547	16.0947	27.3365	7.86122	14.5625	18.6365	11.3851	-0.0719142	0.763192
chr10	1900767	1902072	25.8849	32.9022	33.5219	33.9199	29.7751	34.9408	30.7895	31.8157	32.7515	29.1968	35.9526	32.0252	22.8822	31.9899	39.1495	21.7037	30.6494	24.1547	27.5765	27.7666	chr10	1900951	1902951	SCAMP2	23.2819	21.1484	15.864	24.3781	9.84134	16.7998	21.5565	30.682	15.4362	20.5655	11.911	28.5364	21.0573	17.4813	26.969	24.3439	15.1674	17.4115	15.3669	10.4362	0.0422571	0.859595
chr10	1917910	1921575	35.0942	29.2028	41.1834	31.8479	35.233	29.7631	29.0505	31.1766	51.0416	35.7772	46.3643	31.62	28.9464	30.8982	25.0231	32.6707	37.8353	34.4133	34.2325	35.4382	chr10	1919139	1921139	ENSGALG00000028859	0	0	0.178129	0	0	0	0.124757	0	0.0473529	0	0.0736542	0.12273	0	0	0	0	0	0.0779662	0	0	0.299443	0.199633
chr10	1917910	1921575	35.0942	29.2028	41.1834	31.8479	35.233	29.7631	29.0505	31.1766	51.0416	35.7772	46.3643	31.62	28.9464	30.8982	25.0231	32.6707	37.8353	34.4133	34.2325	35.4382	chr10	1919139	1921139	CSK	9.20045	5.26437	14.9408	7.19251	7.35612	5.79729	5.92798	3.70278	23.743	5.54027	6.70533	6.84343	3.95009	5.77084	3.04923	4.1894	5.27171	5.99439	5.50766	2.47687	0.743972	0.000169434
chr10	1917910	1921575	35.0942	29.2028	41.1834	31.8479	35.233	29.7631	29.0505	31.1766	51.0416	35.7772	46.3643	31.62	28.9464	30.8982	25.0231	32.6707	37.8353	34.4133	34.2325	35.4382	chr10	1916366	1918366	CPLX3	0.425306	0.539674	0.72496	0	9.2753	0.394228	0	0	0.675227	0	11.4109	0.595076	0	0	0	0	0.340994	0	42.1999	0	0.135085	0.570149
chr10	1981742	1983452	37.5615	24.6906	41.1318	23.2695	27.0237	34.8193	43.9952	31.4252	29.3483	40.7674	35.4216	33.4714	29.5811	32.354	47.6975	25.9347	42.978	35.3375	30.0595	44.3478	chr10	1980897	1982897	ARID3B	6.29152	6.66302	10.0568	4.10404	3.3223	4.31812	9.77659	4.90854	7.02193	7.38273	2.76425	5.84706	6.07125	6.50786	5.69216	10.6351	7.80191	4.7536	6.12256	3.41003	0.149613	0.528979
chr10	2112666	2120951	52.8421	42.4326	66.3718	46.7559	51.0946	46.4356	41.6453	46.5698	46.9078	46.2792	49.4494	41.633	47.8622	48.0631	38.3398	38.0453	57.8113	46.0895	48.6554	60.9796	chr10	2112788	2114788	ENSGALG00000001478,STOML1	3.23726	5.40059	15.7472	9.33353	32.8743	9.53272	15.3421	17.573	14.932	18.3665	30.7421	11.0005	10.9807	5.00711	3.36459	3.0346	14.9997	13.4355	8.77559	4.32429	0.197385	0.404199
chr10	2131897	2138058	26.5586	43.2127	46.7971	36.3856	41.1956	33.1239	30.5523	43.6868	30.9511	29.6611	39.7178	38.9034	34.836	36.1289	38.1049	38.3929	35.8565	41.5777	22.702	41.0481	chr10	2129956	2131956	ZP3	4.04163	5.30077	3.59034	4.69773	6.85841	2.98687	960.342	2.97142	2.09003	5517.4	2.52195	114.051	0.165245	0.179176	0.192158	9.56367	0.70635	0.391848	0	0.653842	-0.297818	0.202203
chr10	2131897	2138058	26.5586	43.2127	46.7971	36.3856	41.1956	33.1239	30.5523	43.6868	30.9511	29.6611	39.7178	38.9034	34.836	36.1289	38.1049	38.3929	35.8565	41.5777	22.702	41.0481	chr10	2133226	2135226	COMMD4	11.5995	33.2644	17.3767	23.3707	24.2572	24.7114	39.4454	25.304	13.95	16.281	21.598	20.4734	41.2573	24.6911	36.4336	25.7755	19.9614	23.9367	15.9524	3.38864	0.128721	0.588612
chr10	2131897	2138058	26.5586	43.2127	46.7971	36.3856	41.1956	33.1239	30.5523	43.6868	30.9511	29.6611	39.7178	38.9034	34.836	36.1289	38.1049	38.3929	35.8565	41.5777	22.702	41.0481	chr10	2135428	2137428	NEIL1	1.02739	7.28793	4.91175	2.29195	0.831739	3.73141	4.61196	3.59272	8.4778	4.53819	1.38905	5.60332	10.5536	3.17879	3.49809	4.65641	3.1442	3.32623	4.32976	3.39605	-0.0453396	0.849461
chr10	2131897	2138058	26.5586	43.2127	46.7971	36.3856	41.1956	33.1239	30.5523	43.6868	30.9511	29.6611	39.7178	38.9034	34.836	36.1289	38.1049	38.3929	35.8565	41.5777	22.702	41.0481	chr10	2135428	2137428	MAN2C1	2.50917	18.5579	8.73844	5.3147	4.3235	9.95684	6.88155	8.31507	9.51387	4.89648	3.97568	9.00612	10.3046	7.13775	14.1266	9.95803	4.9955	5.54791	5.61437	4.43107	0.308566	0.185613
chr10	2180772	2187511	40.6951	44.3571	54.1921	40.9304	44.1713	41.0284	38.6707	45.8599	42.2517	46.5779	42.7121	40.5292	43.8087	43.1866	40.2736	47.5241	48.4163	37.0197	37.4405	48.7828	chr10	2184772	2186772	SNX33	6.41434	10.3855	2.41667	10.2016	3.47287	10.7571	12.4689	9.99074	6.13262	9.31005	4.16021	9.75011	8.27924	7.56655	12.3661	7.3586	9.10687	11.4281	6.43717	4.06658	-0.521416	0.0183873
chr10	2180772	2187511	40.6951	44.3571	54.1921	40.9304	44.1713	41.0284	38.6707	45.8599	42.2517	46.5779	42.7121	40.5292	43.8087	43.1866	40.2736	47.5241	48.4163	37.0197	37.4405	48.7828	chr10	2179147	2181147	PTPN9	4.23231	5.79169	12.1614	8.32041	11.3901	5.76488	10.5188	11.2349	12.9607	11.1877	19.3666	10.9848	2.62102	7.44272	2.40211	5.25076	11.6314	9.41552	7.51032	4.61218	0.124983	0.599572
chr10	2180772	2187511	40.6951	44.3571	54.1921	40.9304	44.1713	41.0284	38.6707	45.8599	42.2517	46.5779	42.7121	40.5292	43.8087	43.1866	40.2736	47.5241	48.4163	37.0197	37.4405	48.7828	chr10	2184772	2186772	SNUPN	5.32857	2.75435	2.89621	3.5492	3.09594	2.61135	3.20021	1.96663	2.50174	2.5164	3.40712	2.83336	3.49309	3.81693	2.58281	2.31228	5.28081	2.90678	3.26342	1.38076	-0.157708	0.506655
chr10	2180772	2187511	40.6951	44.3571	54.1921	40.9304	44.1713	41.0284	38.6707	45.8599	42.2517	46.5779	42.7121	40.5292	43.8087	43.1866	40.2736	47.5241	48.4163	37.0197	37.4405	48.7828	chr10	2184772	2186772	CSPG4	4.02728	0.247062	1.9726	7.67615	1.79548	5.92315	4.3339	15.7966	1.28702	4.52857	1.83072	7.09683	0.302593	3.59522	0.476505	1.17772	10.0468	12.4837	6.60574	12.5754	-0.0319318	0.893686
chr10	2610674	2611262	0	0	0	0.0609756	0.0689655	0	0	0	0	0	0	0	0	0.0659196	0	0.574713	0	0	0	0.0841043	chr10	2608832	2610832	TSPAN3	36.05	61.6356	13.6956	27.206	84.7563	44.2158	39.5893	47.2273	36.9589	41.8352	74.1389	56.2936	38.5338	53.5604	95.2029	33.5738	47.177	41.3309	41.5909	58.2746	-0.135092	0.570127
chr10	3151173	3157195	10.832	2.93392	8.34013	11.5995	11.3076	5.94478	6.68778	9.07504	3.12949	3.84773	10.1731	5.24705	8.4337	4.31989	8.33305	8.1599	6.81889	21.801	8.14261	14.916	chr10	3149742	3151742	AGPHD1	6.21548	20.3346	7.84701	7.72595	5.68508	7.76436	4.45549	3.88881	8.26822	3.58789	5.12021	4.54147	22.9247	6.2584	12.6985	3.52585	12.0361	5.86821	4.36864	2.37209	-0.248532	0.290698
chr10	3151173	3157195	10.832	2.93392	8.34013	11.5995	11.3076	5.94478	6.68778	9.07504	3.12949	3.84773	10.1731	5.24705	8.4337	4.31989	8.33305	8.1599	6.81889	21.801	8.14261	14.916	chr10	3155461	3157461	IREB2	30.9146	22.1494	24.7521	15.3197	13.0574	14.4968	15.5366	10.8293	15.1454	11.7109	12.5699	11.3618	10.0115	18.6505	18.1163	10.4268	20.3539	9.41901	9.75024	13.3066	-0.200564	0.396516
chr10	3228733	3229485	0.196535	0.22614	0.131168	1.14954	0.946269	0.318541	0.321821	0	0.0976562	0.0876664	0.118046	0.0771383	0.113944	0.203926	0.0526271	0.344922	0.332105	0.031732	0.14669	0.134359	chr10	3227270	3229270	WDR61	11.0739	17.847	6.27077	15.8143	7.94429	8.85986	16.6582	14.017	11.5134	10.0061	7.38264	20.3819	7.73459	11.6711	13.8383	8.12306	6.13235	11.1513	6.77538	12.575	0.019056	0.936444
chr10	3228733	3229485	0.196535	0.22614	0.131168	1.14954	0.946269	0.318541	0.321821	0	0.0976562	0.0876664	0.118046	0.0771383	0.113944	0.203926	0.0526271	0.344922	0.332105	0.031732	0.14669	0.134359	chr10	3227270	3229270	ACSBG1	0.649223	0.573434	0.327525	0.442338	13.9438	0.334617	0.249245	0.284504	0.422794	0.321267	14.3932	0.25335	0.526906	0.680077	1.04646	0.367256	0.419586	0.248079	4.63599	0.649358	0.296471	0.20435
chr10	3228733	3229485	0.196535	0.22614	0.131168	1.14954	0.946269	0.318541	0.321821	0	0.0976562	0.0876664	0.118046	0.0771383	0.113944	0.203926	0.0526271	0.344922	0.332105	0.031732	0.14669	0.134359	chr10	3227270	3229270	WDR61	2.45159	1.86624	1.04124	2.87509	1.76937	0.952995	1.7286	1.10476	2.07285	3.88869	1.49887	3.99416	0.97742	2.29637	1.21864	2.01379	2.31575	1.64804	1.34989	1.55659	0.157985	0.505902
chr10	3228733	3229485	0.196535	0.22614	0.131168	1.14954	0.946269	0.318541	0.321821	0	0.0976562	0.0876664	0.118046	0.0771383	0.113944	0.203926	0.0526271	0.344922	0.332105	0.031732	0.14669	0.134359	chr10	3227270	3229270	DNAJA4	20.6267	15.5496	10.844	15.5493	15.8334	9.23678	27.9466	5.58011	14.134	13.0369	13.1535	36.8718	10.9843	44.9596	13.4841	9.89197	23.8278	14.266	14.5264	10.5325	0.0264573	0.911838
chr10	3228733	3229485	0.196535	0.22614	0.131168	1.14954	0.946269	0.318541	0.321821	0	0.0976562	0.0876664	0.118046	0.0771383	0.113944	0.203926	0.0526271	0.344922	0.332105	0.031732	0.14669	0.134359	chr10	3227270	3229270	IDH3A	114.052	36.9162	8.75813	54.7822	45.7455	11.328	24.1149	16.6306	14.7451	11.1164	39.8927	15.0813	19.3141	71.6493	23.2279	9.10008	8.752	10.4065	19.9641	13.7775	0.296805	0.203817
chr10	3611363	3611914	3.40909	0.94697	0.0323206	0.0289184	0.028177	0	0.49571	0	1.20614	1.96975	0	0.0686813	0	0.11935	0	0	0	2.0204	0.247968	1.55102	chr10	3610022	3612022	RAB8B	52.7646	57.1622	47.6314	42.0305	19.6101	70.4078	51.6959	58.6999	126.261	46.4496	18.7637	67.8806	31.2796	50.3763	36.3694	16.3053	46.2358	50.1122	24.4488	40.3249	0.2484	0.290961
chr10	3952074	3953072	0.392157	0	0.189394	0	0	0	0	0	0.26455	0	0	0	0	0	0.909091	0	0	0	1.0101	0.0957854	chr10	3950419	3952419	VPS13C	8.40494	19.1069	4.58473	4.39794	10.1172	11.0079	4.43589	4.16207	8.93762	4.65393	9.22847	10.5553	11.5917	4.23382	11.5024	8.3582	5.37129	7.15769	5.18912	15.4743	-0.0168333	0.943845
chr10	4743130	4757963	7.04102	8.403	8.41418	9.17873	15.3387	8.86681	6.56635	16.4338	9.47291	8.91174	15.6586	12.4131	5.27389	11.953	10.3046	12.5669	8.70581	13.1703	12.88	12.1763	chr10	4745882	4747882	FOXB1	0.383617	0	0	0	0	0	0	0	0	0	0	0.145254	0.845736	0	0	0	2.38872	0	0	0	-0.317061	0.17317
chr10	4872235	4873678	15.8039	6.33333	19.5567	13.0898	18.3416	16.5368	16.5873	15.1556	9.65909	17.9411	14.8004	11.4075	18.3888	15.1331	16.6635	22.7258	21.6897	9.79319	13.2457	14.9816	chr10	4870866	4872866	BNIP2,GTF2A2	58.9352	37.2597	32.2915	45.5095	30.1339	44.4335	54.0978	40.5349	43.4598	39.0064	22.9467	29.3793	26.3945	64.2762	58.7038	24.9283	43.9723	33.7063	23.8776	35.2411	-0.0279104	0.907015
chr10	5754050	5756379	1.09857	0.913755	1.01549	0.720785	0.276542	0.00790639	0.10036	0.421906	3.47712	0.201109	0.322023	0.878866	0.126296	3.15274	0.648659	0.0395232	1.28008	4.63564	0.0474158	1.16709	chr10	5753950	5755950	LRRC49	0.733565	0.431849	0.670222	2.44713	14.4489	2.08799	2.84327	2.07226	1.02885	1.87322	15.0314	2.0062	1.74414	3.15511	5.06964	1.35372	1.09057	4.11667	3.78867	7.36816	-0.131857	0.579482
chr10	6229967	6235673	11.3623	5.12225	18.2582	12.7051	13.8166	1.84426	10.4793	10.4581	11.3511	5.97434	16.3663	9.1941	18.6276	18.5936	3.95239	1.8622	10.97	21.4702	9.24503	12.2571	chr10	6232432	6234432	MYO1E	1.63757	5.45676	1.82954	3.89648	3.67266	5.64208	2.33266	8.79088	1.49347	4.09954	2.65413	6.1011	3.46872	3.86573	10.2081	3.55029	8.56118	6.68663	4.81117	7.94416	-0.264246	0.260246
chr10	6229967	6235673	11.3623	5.12225	18.2582	12.7051	13.8166	1.84426	10.4793	10.4581	11.3511	5.97434	16.3663	9.1941	18.6276	18.5936	3.95239	1.8622	10.97	21.4702	9.24503	12.2571	chr10	6232432	6234432	ENSGALG00000025917	0	1.60142	0.663743	1.89988	0	1.2623	1.36701	1.3269	1.68421	1.13706	0.811357	0.904677	0.435448	0.636627	2.19284	0.928331	1.04524	0.64423	0.533489	1.24966	-0.469139	0.0369119
chr10	6229967	6235673	11.3623	5.12225	18.2582	12.7051	13.8166	1.84426	10.4793	10.4581	11.3511	5.97434	16.3663	9.1941	18.6276	18.5936	3.95239	1.8622	10.97	21.4702	9.24503	12.2571	chr10	6232432	6234432	CCNB2,RNF111	8.89358	7.31495	14.768	5.5478	6.02084	5.48834	124.167	9.50128	11.206	13.1097	7.18161	8.20108	5.3365	5.55198	11.0109	5.49313	6.49103	7.14338	5.74665	6.71843	-0.0322423	0.892658
chr10	6371561	6372232	1.86498	2.12117	5.78461	1.22866	1.73112	4.26829	1.44683	2.27642	1.42496	2.49088	1.79108	3.26498	3.84376	2.85102	2.83613	2.38428	5.26598	3.22743	2.77758	2.39499	chr10	6371020	6373020	SLTM	29.1153	9.09356	8.21491	11.1983	8.2751	5.46191	7.5998	6.0974	10.2343	6.59447	6.49449	6.31592	4.89482	11.8575	8.90413	6.13375	6.12627	5.16332	5.91572	6.67433	-0.295872	0.205308
chr10	6371561	6372232	1.86498	2.12117	5.78461	1.22866	1.73112	4.26829	1.44683	2.27642	1.42496	2.49088	1.79108	3.26498	3.84376	2.85102	2.83613	2.38428	5.26598	3.22743	2.77758	2.39499	chr10	6371020	6373020	FAM63B	11.6266	16.4069	7.5878	9.80744	13.2825	11.8729	9.66739	6.35246	10.0248	10.0857	12.3325	7.59056	8.29154	12.5652	11.0472	8.06663	8.06193	9.38985	10.3748	12.6095	-0.375734	0.102552
chr10	7089540	7090784	29.6466	9.06998	27.4074	36.0254	18.0294	18.254	12.5745	37.2857	12.7236	32.6335	33.9943	27.3372	17.8571	26.9608	16.3333	14.0904	22.5786	20	22.3049	40.8333	chr10	7088066	7090066	ENSGALG00000014375	6.33496	8.36204	4.4305	4.18025	3.95199	4.01643	3.83809	5.51912	7.50556	3.35402	3.32304	3.56153	2.75151	5.44769	4.27499	2.48436	3.63821	4.07507	3.65432	7.70107	0.0380496	0.873462
chr10	7158255	7159461	10.7585	20.2483	21.8193	5.90785	7.8571	16.4634	7.34375	12.5	10.6097	7.66956	3.77987	9.65151	14.9306	14.6316	5.71023	10.42	22.3073	16.9638	8.54543	19.4823	chr10	7156296	7158296	MNS1	1.40108	0.980617	1.19787	0.75857	1.73581	0.651583	0.32063	0.413923	1.35301	0.323711	1.5986	0.523533	0.961047	0.95758	1.29529	0.7143	0.479726	0.649579	0.805742	1.13114	-0.149325	0.529782
chr10	7158255	7159461	10.7585	20.2483	21.8193	5.90785	7.8571	16.4634	7.34375	12.5	10.6097	7.66956	3.77987	9.65151	14.9306	14.6316	5.71023	10.42	22.3073	16.9638	8.54543	19.4823	chr10	7156296	7158296	TEX9	1.6555	1.41387	1.32718	0.832924	1.64684	1.01726	0.59177	0.67223	1.82327	0.560639	1.4791	0.608458	1.15174	1.00371	1.82514	0.691229	0.380246	0.83314	1.04992	1.05505	-0.169787	0.474214
chr10	7266236	7267129	57.5632	20.5033	48.9618	28.8889	28.6042	49.8612	32.3473	33.4926	30.597	39.5842	41.5175	29.1212	28.5453	54.224	24.7262	38.9895	48.0247	45.5246	30.8225	38.4615	chr10	7264831	7266831	NEDD4	12.135	11.0081	8.47954	7.76317	4.80274	4.56663	7.22226	11.4185	11.2257	4.00738	4.23242	4.98802	2.85474	6.64671	3.69583	2.83535	7.13267	6.52838	6.1072	14.5071	0.0961727	0.686698
chr10	7426985	7428692	0.694701	3.51608	3.37213	6.10051	4.34685	0.745971	1.25342	1.64044	3.59646	2.42108	2.57212	9.15208	1.42432	4.02995	0.181029	0.594031	4.48614	12.0994	2.3882	2.95168	chr10	7425106	7427106	CCPG1,DYX1C1,PYGO1	119.798	28.6849	20.2221	53.2025	19.6733	22.0968	16.0119	18.0307	19.5167	12.1929	18.4505	14.3115	11.8372	50.1514	41.3259	95.4398	16.6707	17.0424	18.9454	23.7939	-0.290601	0.213881
chr10	7426985	7428692	0.694701	3.51608	3.37213	6.10051	4.34685	0.745971	1.25342	1.64044	3.59646	2.42108	2.57212	9.15208	1.42432	4.02995	0.181029	0.594031	4.48614	12.0994	2.3882	2.95168	chr10	7425106	7427106	PIGB	36.3795	10.6254	5.74908	16.1389	5.78185	5.92967	4.04989	5.71614	6.03116	3.19772	5.19906	4.19608	3.68953	11.7764	10.9504	16.8728	4.0999	5.5986	5.33568	9.87557	-0.234696	0.319244
chr10	7481441	7484752	0	1.52778	2.5641	12.0635	0.819672	3.18471	0	1.55724	2.29902	0	1.81818	0	4.36508	0	0.144509	1.08108	1.81818	4.44444	0.877193	3.84615	chr10	7480347	7482347	RAB27A	29.1827	79.923	44.5418	85.1719	27.4243	72.3202	74.7045	58.5042	37.4946	18.0082	31.8575	34.917	73.6944	65.3281	67.6032	35.3993	22.8698	62.0098	34.4862	26.9228	0.428567	0.0593824
chr10	8180199	8181842	3.78644	2.65581	5.60151	0.0221828	6.04167	4.35267	2.73484	4.32946	2.50523	3.65854	5.32807	4.63262	2.97915	5.15658	3.46064	3.48001	4.52495	7.74096	3.98179	0	chr10	8178944	8180944	FAM214A	21.9517	16.8668	5.53943	9.28746	10.6969	10.3684	9.97685	8.13669	8.36181	8.715	9.94873	8.25103	7.76162	8.27226	15.392	8.81561	7.85339	5.52933	8.51087	10.9444	-0.272395	0.245283
chr10	8239986	8240722	8.78271	5.08906	11.8204	6.20736	5.35941	4.66592	3.40338	18.2336	9.54966	3.7046	5.69765	5.42986	4.69595	4.88013	1.91358	1.66113	10.8274	5.4	5.46012	7.70833	chr10	8238551	8240551	MYO5A	1.23074	10.8642	3.25385	3.11182	34.3994	3.66074	3.50996	10.0842	7.20993	4.84133	31.9504	8.24421	6.02105	1.45951	4.58382	4.43977	2.92991	7.45793	9.66946	19.2597	-0.00447689	0.985055
chr10	8334372	8335568	3.8165	2.35052	2.40156	2.67558	7.5156	3.19169	0.828278	5.11939	3.08781	1.89609	6.66388	0.969614	0.733568	5.15009	1.20968	1.15373	2.47861	4.74747	4.55217	6.40376	chr10	8332728	8334728	ENSGALG00000004641	0.053898	0.0509943	0.262833	0.0659208	0.376516	3.92326	0.264459	0.381158	0.229546	0.114075	0.37804	1.05172	1.95504	0.0762666	20.4544	13.7018	1.97348	0.0989522	0.794465	0.588621	-0.380495	0.0979262
chr10	8506177	8507213	0.617284	11.6379	0	0	9.89011	0	0	15.0495	7	0	0	3.07692	0	0.925926	0	0	0	0	0	0	chr10	8506258	8508258	TMOD3	8.80862	20.9528	8.19343	17.3587	12.6322	27.2975	18.5402	31.7498	21.1373	11.6549	12.4516	20.7354	13.7729	20.0491	50.6832	13.0295	45.5091	24.0197	15.0937	39.4319	0.037088	0.876636
chr10	8580705	8581713	0	0.0862471	0	0.206044	0	0	0	0.902256	0.328283	0.131711	0	0	0.137363	0	0	0	0	0	0.0952314	0.166537	chr10	8579236	8581236	LYSMD2	55.4089	33.7754	13.9426	22.7443	50.128	11.4455	16.417	13.4172	15.9278	11.2224	39.2032	10.8052	18.1202	46.285	15.8772	18.5247	16.7355	13.2288	17.673	11.342	-0.248511	0.290738
chr10	9867761	9868455	0	0.0892724	0.206374	0.0169924	0.194335	0.196731	0.0208507	0.0342265	0.055449	0	0	0	0	0.03861	0	0.117925	0	0.1287	0.0222816	0	chr10	9867663	9869663	SHC4	0.4498	0.084973	0.660638	1.02731	5.19748	0.433387	4.1387	0.731489	3.3795	0.192686	6.2445	0.881232	0.042101	0.60561	0.140888	0.12782	0.212653	1.50424	2.72427	0.806624	0.073584	0.757849
chr10	9895487	9897970	30.2789	45.5309	34.0684	20.5754	31.9683	41.0477	25.5591	40.0515	24.9464	21.2261	26.7331	27.9623	29.316	48.4131	37.392	29.3689	49.551	46.6134	25.5684	22.2238	chr10	9897577	9899577	ENSGALG00000028428	2.16465	5.6391	2.02127	3.39438	2.96531	5.59796	4.60713	4.64749	1.15172	2.00798	1.59875	2.2287	2.25087	2.94086	2.835	3.7648	1.64856	6.16336	2.50532	1.56212	0.475874	0.0339324
chr10	9895487	9897970	30.2789	45.5309	34.0684	20.5754	31.9683	41.0477	25.5591	40.0515	24.9464	21.2261	26.7331	27.9623	29.316	48.4131	37.392	29.3689	49.551	46.6134	25.5684	22.2238	chr10	9897577	9899577	SECISBP2L	20.0704	14.9024	8.63603	10.6911	10.4184	9.9606	12.6733	23.9784	8.64236	10.0131	10.1307	12.8502	5.82096	11.2708	12.9073	13.1822	11.3429	13.6016	10.1431	20.4075	0.122228	0.607702
chr10	9953341	9955400	0.0230382	0.156439	0.0146534	0.0182648	0.00536366	0.0154186	1.19143	0	0.0178348	0.0504808	0.12931	0.50439	0.00752785	0.0126263	0.0117171	0.0251572	0.0184855	0.397912	0.011976	0	chr10	9952980	9954980	GALK2	3.83243	16.3273	3.12082	6.08435	1.70025	6.32714	4.71647	4.40181	5.25	4.88012	1.91745	8.68734	4.93692	5.36589	26.5105	7.55534	3.59724	8.51842	4.58664	13.4314	-0.0287425	0.904255
chr10	10980606	10981859	2.38095	1.2416	0.925926	1.27489	0.429779	1.04167	0.117925	0.471311	4.96789	0.138256	0.28126	1.93702	0.420168	0.473426	0	0.0667557	0.29304	2.15517	0.39005	1.88794	chr10	10978737	10980737	ADAMTSL3	9.37455	0.595393	0.795346	23.7022	5.04672	9.14776	18.8915	18.945	0.845453	12.0525	7.06297	6.91743	1.40072	5.62542	3.0646	0.439156	18.0657	16.7974	13.4329	41.3294	0.0133661	0.955399
chr10	11594496	11595178	0	0.274725	0	0.0810852	0	0.643501	0.0543478	0	0	0.0892857	0.219298	0.0692521	0	0	0	0	0	0	0.0903929	0	chr10	11592610	11594610	STARD5	1.83546	8.52878	9.00053	3.33874	9.10199	5.83691	4.63408	26.3905	18.3268	2.5448	7.74266	5.99546	7.42514	5.16216	10.5014	6.58121	16.2907	10.694	6.33883	20.4544	-0.250149	0.287467
chr10	11594496	11595178	0	0.274725	0	0.0810852	0	0.643501	0.0543478	0	0	0.0892857	0.219298	0.0692521	0	0	0	0	0	0	0.0903929	0	chr10	11592610	11594610	IL16	0.785451	0.805446	0.824216	0.153425	0	0.720883	0	1.30496	4.6856	0.147543	0.169747	0.585429	0.38687	0.675024	0.562664	0.305445	0.477955	0.497655	0.454354	2.29641	-0.121981	0.608433
chr10	11594496	11595178	0	0.274725	0	0.0810852	0	0.643501	0.0543478	0	0	0.0892857	0.219298	0.0692521	0	0	0	0	0	0	0.0903929	0	chr10	11592610	11594610	IL16	0.547662	0.570812	1.09831	0.60808	0	0.831861	0.141865	0.609512	5.40108	0.0305132	0.135584	0.645278	0.376353	0.263929	0.502344	0.27357	0.463214	1.28281	0.239669	3.22448	-0.124287	0.601622
chr10	11594496	11595178	0	0.274725	0	0.0810852	0	0.643501	0.0543478	0	0	0.0892857	0.219298	0.0692521	0	0	0	0	0	0	0.0903929	0	chr10	11592610	11594610	IL16	1.14618	2.00551	3.87988	2.43536	0.343167	2.31119	0.25746	6.09642	17.755	0.305572	0.289864	2.454	0.9492	1.72255	1.01518	0.547468	2.60256	4.84834	2.34627	6.55307	-0.158611	0.504193
chr10	12385631	12393337	6.02458	5.00543	7.28109	6.25007	35.3878	14.3662	6.56025	12.906	9.32548	8.4109	45.4892	8.45164	4.1199	6.51656	6.12902	8.30078	6.84022	11.882	29.496	6.93791	chr10	12392889	12394889	ENSGALG00000026201	0.348766	0.0307873	0.513643	0.244852	44.995	0.0177291	0	0.0127404	0.683679	0.0125516	50.5016	0.297493	0.355272	0.026977	0.118135	0.197227	0.0281781	0.0272629	9.31815	0.024165	0.919409	1.01384e-08
chr10	12467804	12468310	0	3.41123	10.7143	10.6803	1.19048	0	5.9719	0.308642	3.7234	13.1233	7.48792	8.09524	5.97826	1.26102	0	0.625978	2.38095	0	6.9207	1.89394	chr10	12466797	12468797	RLBP1	2.88647	0.702749	0.136965	0.960523	2.46522	0.246032	0.216628	0.837758	0.216766	0.878355	5.09396	0.200056	0.200855	1.18069	0.0449317	0.184831	0.124185	0.360529	73.399	0.733996	0.156907	0.508844
chr10	12525562	12526282	0	0	0	0	0	0	0.431034	0	0.0917431	0	0	0	0	0	0	0	0	0.641026	0	0	chr10	12523812	12525812	MFGE8	43.7919	130.276	9.00087	59.679	13.927	43.0749	59.2421	53.8616	6.08674	84.9992	10.4297	39.7206	35.9342	65.3044	7.1983	4.83371	14.8402	76.93	36.6465	39.0789	0.260529	0.26726
chr10	13447077	13448214	0.606894	0.182927	0.119101	3.13502	0.631761	0.19664	0.0590085	0.406778	0.845395	0.232014	0.34299	1.44031	0.185271	0.324834	0.176245	0.150665	0.31511	1.0135	0.799996	1.60754	chr10	13445562	13447562	KLHL25	11.374	11.0258	3.8235	5.28891	4.14579	1.99178	3.05236	6.3368	2.84913	2.49848	4.06956	1.94977	1.87203	10.769	20.8593	7.88774	1.93312	5.09153	3.58094	0.976568	-0.198695	0.401023
chr10	16931895	16932473	4.03772	2.72727	23.4743	6.06061	6.62724	2.63612	2.07761	9.33615	3.25472	1.28653	4.75576	8.91111	6.52182	2.71289	21.1211	15.836	6.31761	9.03444	26.5167	12.8911	chr10	16930374	16932374	ALDH6	4.54551	0.829861	0.991381	6.66818	0.213835	8.13159	3.80904	0.788647	1.47059	4.6611	0.28073	17.7816	1.19222	4.34153	3.43849	1.91947	17.0785	7.41874	21.205	3.7151	0.260596	0.267133
chr10	16968845	16970163	0.909873	3.10413	0	2.18911	1.17116	0.405405	0.81241	0.843254	0	0.391264	1.48504	1.5022	1.77425	1.30749	0.0287026	2.95635	1.41119	0.412291	1.15289	0.667562	chr10	16967538	16969538	LRRK1	1.33127	1.28009	2.80392	2.65189	10.5271	2.57444	1.61352	2.55091	11.7919	1.9517	9.94817	3.18899	0.773563	1.76505	0.575582	0.374904	1.2975	4.82956	1.49816	4.69099	-0.261637	0.265157
chr10	17115092	17121070	0.161638	0.0394633	0.279356	0	0.125	0	0.568182	0.150602	0	0	0.240643	0.0612745	0	0.59912	1	0	0.0892857	0	0	0	chr10	17113824	17115824	SNRPA1	72.1841	14.9222	14.782	50.2872	7.18128	21.4344	25.1182	14.2381	16.5143	8.53089	7.39522	12.2437	9.73439	31.2796	19.7301	11.0464	11.3187	14.8391	8.4419	9.0619	0.155723	0.512087
chr10	17115092	17121070	0.161638	0.0394633	0.279356	0	0.125	0	0.568182	0.150602	0	0	0.240643	0.0612745	0	0.59912	1	0	0.0892857	0	0	0	chr10	17120369	17122369	PCSK6	0.336796	6.65165	0.82294	1.64363	0.578118	0.821651	0.64809	5.17165	0.175139	0.575991	0.444792	2.82957	0.790675	1.74387	0.25328	0.172768	1.29017	4.28448	1.66814	2.90556	-0.233974	0.320778
chr10	17222930	17225436	9.36441	0.55325	0.371901	0	0.0869469	0.0518038	4.90661	1.57942	2.58137	0	0.0821468	3.31089	0.266031	0	10.3213	0.120192	0.141912	2.37501	0	11.1842	chr10	17222371	17224371	CLPX	76.8287	42.8166	17.0448	28.7179	11.4234	13.4292	13.6728	28.7768	11.5516	10.1054	10.3402	10.5579	35.7561	59.3806	23.757	19.2032	11.5491	15.2472	18.3009	15.3111	0.219648	0.352124
chr10	17245037	17246010	0	0	0	0.152788	0	0	0	0	0	0.163399	0	0	0	0	0	0	0	0	0.0904263	0	chr10	17243076	17245076	PDCD7,UBAP1L	16.1674	9.41565	8.88869	9.41576	16.2614	7.6361	7.55302	8.20775	9.66122	4.47567	16.977	6.72929	8.19846	9.5071	11.1915	6.53686	8.25165	10.1643	7.88117	7.30278	-0.304487	0.191797
chr10	17540600	17542419	1.22031	1.76245	2.53847	0.299145	0.382769	0.0625391	0.331583	1.85057	0.650407	0.0482568	2.3111	0.45977	0.302376	0.263158	0.025	0.183122	0.55117	0.0573075	0.00810241	0.0692042	chr10	17539427	17541427	PTPLAD1	7.8853	66.9595	7.36305	12.6016	40.6798	14.8337	21.8745	29.0099	13.0543	11.2944	35.6558	19.9917	27.1603	11.2404	23.044	22.0564	19.231	22.7064	17.5267	22.3234	0.282207	0.228011
chr10	17540600	17542419	1.22031	1.76245	2.53847	0.299145	0.382769	0.0625391	0.331583	1.85057	0.650407	0.0482568	2.3111	0.45977	0.302376	0.263158	0.025	0.183122	0.55117	0.0573075	0.00810241	0.0692042	chr10	17539427	17541427	VWA9	6.5494	22.8844	6.28056	6.78713	16.7128	5.79858	11.4515	12.2644	8.89757	7.08866	15.1054	8.67452	9.4804	6.65249	10.8902	8.65791	8.15538	8.88189	8.81345	10.0438	0.360582	0.118331
chr10	18168622	18173555	1.97568	1.73455	7.37817	0.878726	0.911287	0.168919	0.111166	0.827423	4.67966	0.136569	1.57738	0.214998	0.75188	0.928738	0	0.190076	0.472813	0	9.53792	4.04492	chr10	18169487	18171487	SMAD6	1.58607	2.78498	1.09015	1.55504	0.746942	4.06698	2.44982	1.16571	1.55664	4.88459	0.748501	3.00423	3.25657	4.05509	1.42819	0.874821	9.99726	2.04218	2.46374	2.89877	-0.191645	0.418272
chr10	18367351	18368240	0.0927796	0	0.0245098	0.0627746	0.140674	0.21645	0.0704412	0	0.0260417	0.0377858	0.0527647	0.0405844	0	0.126366	0.0685871	0.0657752	0.02035	0.0820513	0.0958526	0.0799965	chr10	18366139	18368139	IQCH	0.172572	0.141251	0.161038	0.301217	0.991659	0.167682	0.632303	0.119562	0.326361	0.409091	1.17324	0.431332	0.903593	0.385049	3.38312	0.0463517	0.516101	0.200761	0.254146	0.0756545	0.000233211	0.999221
chr10	18430629	18431616	0.213593	1.60721	0.755105	0.0512821	0.174705	0.382021	1.83249	3.10153	0.0494071	3.15287	0.25003	6.05398	0.032292	2.36814	0.868482	1.59126	0.120242	0.100713	1.09138	0.0438982	chr10	18428851	18430851	C15orf61,MAP2K5	42.3103	18.9382	11.3907	32.5532	34.1186	19.9873	20.0631	16.7369	16.309	15.239	24.9927	13.527	16.0622	36.8516	26.7472	9.24466	12.3972	17.5775	17.4964	18.1513	-0.241072	0.305888
chr10	18576053	18577045	0.129955	0	2.66667	0.0385803	0	0	0	1.25	0.892857	0.0201613	0	0	0.154321	0.0224921	0.337838	0.0688705	0	0	0.0440959	0.519806	chr10	18574422	18576422	PIAS1	18.1934	15.6298	21.5395	12.7694	9.10095	9.81081	6.66291	11.179	26.5021	10.1328	10.2894	15.0152	8.27078	18.7523	18.6707	7.8256	18.7914	14.9292	13.5429	18.8653	0.446212	0.048601
chr10	18693503	18700215	7.18877	8.29047	18.287	7.55273	7.50119	7.02935	8.75531	19.6269	17.1772	9.59824	6.28266	16.1133	15.8326	10.4006	8.30387	7.05514	20.7488	12.0556	11.4992	20.2641	chr10	18697131	18699131	CORO2B	1.40257	2.46784	3.61383	1.47861	14.5855	1.78836	3.1226	1.7136	1.98012	2.79721	16.0714	1.28398	1.14309	2.32557	2.55688	0.746865	2.27499	1.69255	3.8439	2.44574	-0.317234	0.172921
chr10	18780754	18781195	0	0.0496032	0	0.0841751	0	0.252525	0	0	0.333333	0.0841751	0	0	0	0.995671	0	0.236128	0	0	0.0851556	0	chr10	18779108	18781108	GLCE	5.90542	10.0933	9.51812	7.27953	14.3599	6.77614	9.5294	6.72814	4.48907	6.75956	11.9554	17.1462	6.92423	7.60569	11.8271	4.19791	2.56349	7.17429	8.97743	6.20382	-0.219175	0.353187
chr10	19259928	19261731	0.091673	0.414365	0.249433	0.0790397	0.0865801	0.103842	0.132275	0	0	0.175605	0.267094	0.231591	0.413837	0.319921	0.166603	0.853876	0.260104	0.448718	0.486428	0.201807	chr10	19260298	19262298	CASC4	1.11704	1.36119	1.19403	0.804114	1.01744	1.09148	0.69857	0.755617	1.46367	0.803373	0.889692	1.01136	0.683333	1.1767	1.37584	0.779856	0.696707	0.808418	0.786662	1.32366	-0.264603	0.259578
chr10	19259928	19261731	0.091673	0.414365	0.249433	0.0790397	0.0865801	0.103842	0.132275	0	0	0.175605	0.267094	0.231591	0.413837	0.319921	0.166603	0.853876	0.260104	0.448718	0.486428	0.201807	chr10	19260298	19262298	ENSGALG00000026532	8.40375	11.4662	22.2278	20.4946	15.3064	24.5779	21.8157	17.1364	12.5974	20.079	18.3587	19.8191	25.0496	31.6439	41.7171	25.4736	24.6453	16.5195	18.1016	2.03594	0.175538	0.459142
chr10	19259928	19261731	0.091673	0.414365	0.249433	0.0790397	0.0865801	0.103842	0.132275	0	0	0.175605	0.267094	0.231591	0.413837	0.319921	0.166603	0.853876	0.260104	0.448718	0.486428	0.201807	chr10	19260298	19262298	FRMD5	77.4804	0.249786	0.566181	70.3777	4.05486	0.0838952	0.838738	0	0	0	6.91219	0	0.343181	30.7311	0.836623	0.461092	0.5923	0.132105	12.585	0	-0.219338	0.352821
chr10	19259928	19261731	0.091673	0.414365	0.249433	0.0790397	0.0865801	0.103842	0.132275	0	0	0.175605	0.267094	0.231591	0.413837	0.319921	0.166603	0.853876	0.260104	0.448718	0.486428	0.201807	chr10	19260298	19262298	ANKRD34C	0	0.208355	0	0	21.7768	0.420805	0.173731	0.0544713	0.449569	0	22.3935	0.0659469	0	0	0	0	0.0683824	0.109956	1.39265	0	-0.114086	0.631991
chr10	19259928	19261731	0.091673	0.414365	0.249433	0.0790397	0.0865801	0.103842	0.132275	0	0	0.175605	0.267094	0.231591	0.413837	0.319921	0.166603	0.853876	0.260104	0.448718	0.486428	0.201807	chr10	19260298	19262298	TMED3	0.830569	26.8642	17.8572	8.89444	11.4448	9.17655	20.2659	8.15779	9.65893	13.5166	6.58328	17.716	5.00114	8.84205	24.9864	18.8403	7.19749	5.98453	7.41562	1.92864	0.191277	0.419184
chr10	19259928	19261731	0.091673	0.414365	0.249433	0.0790397	0.0865801	0.103842	0.132275	0	0	0.175605	0.267094	0.231591	0.413837	0.319921	0.166603	0.853876	0.260104	0.448718	0.486428	0.201807	chr10	19260298	19262298	ENSGALG00000008275	0	0	0	0	0	0	0	0	0	0	0	0.124993	0	0	0	0	0	0	0	0	-0.0204444	0.931823
chr10	19259928	19261731	0.091673	0.414365	0.249433	0.0790397	0.0865801	0.103842	0.132275	0	0	0.175605	0.267094	0.231591	0.413837	0.319921	0.166603	0.853876	0.260104	0.448718	0.486428	0.201807	chr10	19260298	19262298	CTDSPL2	13.6229	5.008	4.2696	6.78398	5.88915	5.03516	4.71034	3.91998	5.1952	7.40184	7.14799	5.07981	2.16694	4.53537	5.62386	1.9991	3.50581	4.98537	5.12147	9.88606	-0.431111	0.0577256
chr10	19259928	19261731	0.091673	0.414365	0.249433	0.0790397	0.0865801	0.103842	0.132275	0	0	0.175605	0.267094	0.231591	0.413837	0.319921	0.166603	0.853876	0.260104	0.448718	0.486428	0.201807	chr10	19260298	19262298	CASC4	32.7589	28.4068	15.9007	25.6796	31.5846	22.1834	33.498	22.1372	23.3208	23.1697	27.0376	21.1125	28.0597	34.9371	33.925	36.2624	20.8895	18.7216	17.2848	27.3571	0.126235	0.595892
chr10	19259928	19261731	0.091673	0.414365	0.249433	0.0790397	0.0865801	0.103842	0.132275	0	0	0.175605	0.267094	0.231591	0.413837	0.319921	0.166603	0.853876	0.260104	0.448718	0.486428	0.201807	chr10	19260298	19262298	BLM	2.92683	15.8767	17.0542	6.39757	2.59684	6.12306	10.3074	7.88056	24.761	5.5899	2.44118	17.9353	5.62658	6.89732	13.2632	3.44424	13.4553	9.25019	7.85884	4.16715	-0.179759	0.448241
chr10	19259928	19261731	0.091673	0.414365	0.249433	0.0790397	0.0865801	0.103842	0.132275	0	0	0.175605	0.267094	0.231591	0.413837	0.319921	0.166603	0.853876	0.260104	0.448718	0.486428	0.201807	chr10	19260298	19262298	RASGRF1	0.161449	0	0.079022	0.777515	47.1881	0.355844	0.240407	0.534889	1.12978	0.529425	53.8949	1.37256	0.705347	2.39733	1.25989	0.418829	0.460513	0.383776	12.7004	0.482791	-0.0660264	0.782112
chr10	19259928	19261731	0.091673	0.414365	0.249433	0.0790397	0.0865801	0.103842	0.132275	0	0	0.175605	0.267094	0.231591	0.413837	0.319921	0.166603	0.853876	0.260104	0.448718	0.486428	0.201807	chr10	19260298	19262298	GNRHR	0.206181	0	0	0.112502	0.220691	0.16428	0	0.114209	0.127782	0	0.231065	0.139496	0.210855	0	0	0	0	0	0.214453	0	-0.230948	0.327256
chr10	19259928	19261731	0.091673	0.414365	0.249433	0.0790397	0.0865801	0.103842	0.132275	0	0	0.175605	0.267094	0.231591	0.413837	0.319921	0.166603	0.853876	0.260104	0.448718	0.486428	0.201807	chr10	19260298	19262298	MESP2	0	0	0	0.352629	2.26982	0	0.272762	0	0	0	0.900219	0.233607	0.310342	0	0	0	0	0	0	0	-0.194849	0.410384
chr10	19259928	19261731	0.091673	0.414365	0.249433	0.0790397	0.0865801	0.103842	0.132275	0	0	0.175605	0.267094	0.231591	0.413837	0.319921	0.166603	0.853876	0.260104	0.448718	0.486428	0.201807	chr10	19260298	19262298	ANPEP	2.70166	123.709	0.79752	5.62274	2.48922	7.74155	5.92359	5.03839	5.19876	7.50661	1.96556	125.318	40.4629	16.9621	27.2368	3.10429	16.9748	5.26444	4.48804	1.0943	0.150425	0.526719
chr10	19259928	19261731	0.091673	0.414365	0.249433	0.0790397	0.0865801	0.103842	0.132275	0	0	0.175605	0.267094	0.231591	0.413837	0.319921	0.166603	0.853876	0.260104	0.448718	0.486428	0.201807	chr10	19260298	19262298	AP3S2	8.28875	42.8914	24.0095	17.6288	24.6329	28.5878	23.3238	17.2791	45.5574	16.7021	32.5716	33.1996	30.7017	42.2914	79.3903	20.8419	32.0448	21.036	21.3061	6.3159	-0.0255654	0.914799
chr10	19552358	19555082	6.71642	2.82121	3.33333	1.56622	6.78795	2.81532	3.36538	6.07386	1.92044	2.17312	7.41538	5.67376	2.41935	3.80952	4.47761	0.431034	3.7037	2.32558	3.67816	8.76349	chr10	19551263	19553263	HDDC3,PRC1,VPS33B	31.474	26.3412	42.6534	30.2251	32.8434	30.4052	36.3817	21.8819	25.2344	20.3879	29.8292	32.7254	31.2125	47.4517	29.7515	30.5823	22.7464	27.8338	25.3256	9.79881	-0.237282	0.313786
chr10	19552358	19555082	6.71642	2.82121	3.33333	1.56622	6.78795	2.81532	3.36538	6.07386	1.92044	2.17312	7.41538	5.67376	2.41935	3.80952	4.47761	0.431034	3.7037	2.32558	3.67816	8.76349	chr10	19551263	19553263	RCCD1	0.629076	1.90219	6.23603	3.00358	4.06372	6.94145	1.97418	1.31505	3.2038	2.20484	2.24588	4.08085	3.68424	2.77938	3.78891	5.37653	4.841	2.04726	2.05297	0.413568	-0.431769	0.057303
chr10	19570707	19571657	27.9795	35.5787	40.3635	28.5714	24.4142	15.5734	20.2286	35.7625	33.443	29.2683	20.3416	23.8372	34.4403	66.7708	27.0355	44.0378	38.8868	20.8969	40.3846	49.7355	chr10	19569186	19571186	UNC45A	8.79565	10.0941	19.1459	12.1926	9.84501	20.8317	12.0314	16.8437	12.2122	8.19303	10.5024	14.8377	10.8577	16.2761	16.3795	10.5418	20.5525	16.2305	12.2296	6.58035	-0.0408109	0.864357
chr10	19634598	19637922	14.3661	7.66766	39.7008	5.60483	12.0751	9.6808	14.8192	22.2293	10.7623	22.3034	9.04277	22.5167	11.7293	12.5492	13.993	11.8707	26.8111	22.5849	11.9905	17.6303	chr10	19636533	19638533	CKMT1A	0.507064	0	0.118033	0.529814	93.6988	41.9423	0.68923	0.0994758	0	0	120.32	31.3278	0	0	1.03392	1.15488	0.329245	0.200376	48.772	0.487014	-0.278605	0.234257
chr10	19644471	19646445	17.8775	17.2451	60	17.1875	23.2022	15.1595	8.92941	36.1136	27.1103	32.2917	20.2381	6.25	27.4482	25.5556	4.12371	23.2877	54.1317	22.8261	53.0093	32.7778	chr10	19643383	19645383	PPIP5K1	5.0482	2.21705	2.07969	2.7813	10.9014	2.27463	2.20676	1.54769	3.26322	1.80657	10.5507	5.607	8.6716	2.53108	4.04223	3.49435	1.69855	1.43164	4.34928	2.22872	-0.211173	0.37147
chr10	19644471	19646445	17.8775	17.2451	60	17.1875	23.2022	15.1595	8.92941	36.1136	27.1103	32.2917	20.2381	6.25	27.4482	25.5556	4.12371	23.2877	54.1317	22.8261	53.0093	32.7778	chr10	19643383	19645383	MAP1A	6.12727	0.450713	0.704254	3.31055	85.6944	2.69237	3.60149	1.0293	1.27416	4.56611	79.5208	1.77011	1.63934	5.58471	3.91424	0.712974	1.22993	2.88054	12.4949	2.05303	-0.0847647	0.722357
chr11	69059	69770	0.943396	0.193798	0	0	0	0	0	0.396825	0	1.23457	0	0	0	0	0	0	0	0	0	0	chr11	67301	69301	PLA2G15	95.8913	18.3047	9.39292	33.4333	4.37843	14.7263	9.62183	9.58929	23.1751	5.75003	4.56603	15.967	25.1411	38.0901	21.1215	117.489	13.851	15.656	12.3045	16.2959	0.183128	0.439635
chr11	402305	404750	9.46613	4.57912	13.2021	4.36905	6.70389	2.54704	11.0964	8.85645	9.2098	6.66343	7.5093	5.37589	8.00043	4.72012	7.8429	2.39322	11.4677	9.21569	6.98142	15.9927	chr11	401729	403729	CSNK2A2	24.1044	26.0265	14.4015	15.5439	13.9757	12.6639	18.8141	16.6918	20.7037	14.071	10.6931	15.6127	8.14953	16.4545	10.8641	23.5221	14.4356	14.4929	10.4553	9.40455	-0.264624	0.259539
chr11	427554	428757	2.07087	0.497519	1.41213	0.212215	0.275828	0.135922	0.322618	0.405675	0.714683	0.512027	0.348458	0.235483	0.690147	0.564603	0.240857	0.287973	1.10751	0.326962	0.513751	0.523614	chr11	425726	427726	C11H16ORF80	17.9212	24.6103	20.281	23.0118	24.1595	26.4217	47.9073	21.24	31.9992	27.6896	26.4769	25.0742	23.5854	29.8791	44.0415	19.3489	25.5512	19.4102	19.7642	12.1059	-0.283711	0.225435
chr11	450038	454760	69.2596	59.7826	77.2181	57.3672	73.2401	57.6494	56.0805	67.3824	64.2718	65.1839	54.2585	70.6191	65.6603	68.9734	72.8457	60.996	76.1907	64.1084	87.1212	67.9861	chr11	450904	452904	ZNF319	7.92292	1.33248	1.38716	4.92428	2.61522	2.21137	4.46401	2.53874	1.68344	3.44809	3.93706	3.01336	2.10717	2.9189	1.12089	1.70032	1.65401	2.29072	3.0905	1.71081	-0.181313	0.444261
chr11	504919	505684	0	0.15873	0	0	0	0	0.17316	0.232684	1.37681	0	0	0	0	0	0	0	0	0	0	0	chr11	503951	505951	DRC7	0	0.246072	0.0708655	0	0.180203	0.110066	1.13697	0.0297649	0.0158034	0.878204	0.524933	0.265161	0.318578	0	3.10441	0	0.354295	0.0869755	0.129354	0	-0.109655	0.645367
chr11	536842	557667	50.1933	44.7795	62.0012	51.1498	59.082	52.8565	49.5473	54.6397	52.5092	47.5871	58.7178	54.4625	50.3083	53.0507	48.4853	53.7805	56.5166	50.9329	52.0325	57.2127	chr11	538380	540380	GPR114	0.635991	0.435767	3.39738	0.75391	0.412515	0.626665	0.0754675	1.39407	8.05826	0.171461	0.219551	0.766811	0.550501	1.07946	0	0	1.04026	1.2865	0.469572	0.38445	0.184198	0.436921
chr11	536842	557667	50.1933	44.7795	62.0012	51.1498	59.082	52.8565	49.5473	54.6397	52.5092	47.5871	58.7178	54.4625	50.3083	53.0507	48.4853	53.7805	56.5166	50.9329	52.0325	57.2127	chr11	545471	547471	CCDC102A	2.50656	3.07169	5.61884	7.29764	2.51567	6.19845	24.2223	8.94469	6.69565	21.3233	1.79384	9.88828	4.38452	6.64421	5.49947	2.39382	11.3653	8.74973	3.89522	3.24495	-0.303751	0.192928
chr11	536842	557667	50.1933	44.7795	62.0012	51.1498	59.082	52.8565	49.5473	54.6397	52.5092	47.5871	58.7178	54.4625	50.3083	53.0507	48.4853	53.7805	56.5166	50.9329	52.0325	57.2127	chr11	553035	555035	DOK4	0.959367	1.83402	1.28842	2.79641	22.8326	3.00819	35.0481	2.24594	2.1769	22.5647	21.5578	4.83738	3.86962	2.06754	0.804828	0.58838	9.27858	2.70098	4.98773	1.5882	0.042332	0.859349
chr11	536842	557667	50.1933	44.7795	62.0012	51.1498	59.082	52.8565	49.5473	54.6397	52.5092	47.5871	58.7178	54.4625	50.3083	53.0507	48.4853	53.7805	56.5166	50.9329	52.0325	57.2127	chr11	553035	555035	POLR2C	51.3892	31.3586	20.1335	34.7925	23.8694	24.2864	27.0449	21.734	23.3281	16.8783	21.7641	17.1067	23.8552	35.4187	22.2474	19.5003	19.8554	18.3068	23.5072	8.02192	-0.356551	0.122806
chr11	572310	573206	0	0.431034	5.20833	3.42665	1.72414	3.44828	0	8.04598	1.66667	1.14943	4.16667	8.77193	1.72414	0	0	0	2.08333	1.14943	2.04082	0	chr11	570668	572668	CIAPIN1	31.9616	34.3796	21.5473	24.9922	32.3318	19.4699	46.7473	22.4259	19.4531	15.1838	33.0142	17.8703	15.7813	42.0151	13.5271	10.7234	20.2452	14.7125	19.9858	11.7168	-0.13364	0.574317
chr11	607863	613810	48.0647	45.1793	62.8986	52.9419	62.703	52.4801	54.2147	57.4304	47.5011	59.4901	56.883	56.4927	51.3399	56.0499	50.6583	52.0302	59.791	55.5085	56.4515	58.2575	chr11	611322	613322	HERPUD1	6.40409	20.6026	9.88817	11.8455	3.53365	4.49689	12.532	5.36604	9.16658	11.0603	4.66825	15.7247	8.31671	8.07344	6.30171	9.07538	13.0084	9.82214	7.54094	7.85644	-0.263577	0.2615
chr11	607863	613810	48.0647	45.1793	62.8986	52.9419	62.703	52.4801	54.2147	57.4304	47.5011	59.4901	56.883	56.4927	51.3399	56.0499	50.6583	52.0302	59.791	55.5085	56.4515	58.2575	chr11	605901	607901	PARD6A	0	0.279738	0	0	1.71273	0.192563	0.112761	0.276431	0.254478	0	0.941319	0.371122	0	0	0	0.411871	0.896989	0.145105	0.850441	0	0.398999	0.0813855
chr11	626889	628042	32.2132	7.58405	3.1348	23.7778	52.0658	26.4362	19.579	13.0456	5.76923	20.541	33.7005	16.0918	19.833	29.812	47.4621	38.8501	6.96511	49.4598	20.3238	15.4857	chr11	625247	627247	NLRC5	8.27429	6.35059	16.5445	4.7894	0.719211	2.78396	1.68069	9.15871	15.6634	1.99402	0.5245	4.97762	6.83891	4.79699	1.12546	0.921531	7.76964	6.51882	2.46545	4.70468	-0.620134	0.00353548
chr11	877342	878778	17.7083	6.69361	15.7778	0.863484	2.93427	4.16667	1.91511	1.26812	17.8034	29.2517	4.16667	0	2.17391	16.6667	0	0	16.0938	0	1.15942	19.0476	chr11	876196	878196	ENSGALG00000028255	17.6532	8.71454	19.7366	10.565	24.7181	11.0029	9.35467	8.39952	10.0266	7.61086	21.1628	9.97914	6.85785	14.8045	8.1488	5.81519	8.33814	8.99235	9.43079	12.6184	0.149011	0.530655
chr11	981922	983501	1.25855	2.56876	3.18438	0.921638	3.02226	1.21591	0.452715	1.02473	1.44803	1.90119	2.30338	2.15088	2.56215	1.58239	1.62475	1.14882	2.48302	1.94249	0.9795	1.99919	chr11	981067	983067	E2F4	10.4319	4.17608	6.78145	6.44171	3.65659	4.28752	3.91079	3.80243	6.73627	3.50455	4.83671	4.70673	4.77241	7.7367	3.96922	4.19116	4.66331	4.02163	4.49275	4.67696	-0.0904777	0.704425
chr11	1335199	1342766	19.6962	29.9032	30.0801	19.8574	35.9844	19.8889	19.4575	20.7597	25.0673	22.0486	39.0808	30.5569	20.0281	22.7488	32.9127	37.5644	30.3371	19.8609	38.9939	23.8114	chr11	1334784	1336784	FHOD1	76.7951	2.67054	13.5929	35.4522	2.0296	8.10296	4.74844	7.91885	17.867	7.79797	2.61407	7.43165	3.2442	7.75502	4.73151	1.64245	10.9402	7.96587	5.04242	3.45281	-0.374882	0.103397
chr11	1353907	1355737	64.2559	27.5789	45.7539	74.0781	66.4276	47.2136	34.6646	46.9694	78.9474	70.7547	69.8475	71.9298	44.7167	52.4194	63.2253	27.044	42.1526	75.5492	10.8696	50.4444	chr11	1352998	1354998	ENSGALG00000028326	4.38992	6.09912	5.91637	4.45445	17.0836	4.67956	4.233	4.26384	6.18782	8.56029	18.2542	6.34835	37.5224	5.22524	11.2304	3.09318	3.97135	3.9241	7.23401	1.1529	0.0697768	0.770046
chr11	1353907	1355737	64.2559	27.5789	45.7539	74.0781	66.4276	47.2136	34.6646	46.9694	78.9474	70.7547	69.8475	71.9298	44.7167	52.4194	63.2253	27.044	42.1526	75.5492	10.8696	50.4444	chr11	1352998	1354998	ENSGALG00000002237	27.8733	24.7131	34.6305	24.7352	122.712	21.981	26.4906	24.0734	29.1641	21.7454	109.366	30.487	37.7209	30.5792	27.362	18.7056	24.9956	17.1524	46.1386	8.01515	0.180043	0.44751
chr11	1393713	1399651	35.1827	13.4529	52.5846	22.7548	24.9603	25.0528	32.6303	39.6072	14.6968	33.4524	22.1755	41.4226	38.1111	34.8645	50.6151	36.2836	43.1318	36.6044	24.1482	33.4554	chr11	1392132	1394132	ENSGALG00000002247,ENSGALG00000026043	15.9428	9.69421	19.2182	22.3341	37.9173	19.2864	12.6739	22.0102	12.6601	10.3379	28.3601	20.6694	9.60319	28.3975	16.5875	8.56049	27.6515	16.9975	16.0109	11.1216	0.0197003	0.934299
chr11	1457269	1458444	0	0.0274123	0.0339559	0.588235	0.029177	0.0425756	0	0	0	0.0383583	0.0231481	0.0999001	0.0330033	0.163965	0	0	0.0924456	0.0437063	0	0	chr11	1457687	1459687	SLC38A7	3.40044	20.6748	2.46037	3.52316	10.1099	2.56351	4.34864	4.88963	4.47924	6.72421	10.5485	7.29136	3.16152	2.46041	3.74803	8.8928	2.20331	4.22673	4.38739	4.28888	-0.157972	0.505935
chr11	1464864	1466194	16.7417	4.2169	32.26	15.3572	18.8149	11.2891	8.46773	16.9305	19.3299	11.2352	15.7786	22.9633	18.0553	19.9842	14.3956	14.8873	35.1851	11.0991	15.8418	15.7455	chr11	1464298	1466298	GOT2	231.66	186.432	19.2818	119.19	71.6279	27.0834	42.4457	19.1433	12.1419	28.2778	70.0831	36.3718	43.7034	185.412	39.9997	28.7079	12.049	18.0596	77.9967	9.94845	-0.246829	0.294123
chr11	1766746	1772148	61.7285	55.0922	64.2152	61.8873	66.3537	56.8218	54.2747	63.4482	55.4381	60.891	58.9277	55.3809	52.9483	61.9176	61.3095	61.9086	65.0795	56.2815	55.788	55.0032	chr11	1766864	1768864	ST3GAL2	17.6523	5.0702	7.60903	19.6175	12.5145	11.9319	14.1486	13.6048	13.8945	14.5113	15.2657	11.0554	5.51112	11.5768	3.88191	5.3074	9.6212	18.1215	12.3083	7.26558	0.0914682	0.701331
chr11	1766746	1772148	61.7285	55.0922	64.2152	61.8873	66.3537	56.8218	54.2747	63.4482	55.4381	60.891	58.9277	55.3809	52.9483	61.9176	61.3095	61.9086	65.0795	56.2815	55.788	55.0032	chr11	1769196	1771196	PDPR	8.08233	8.22158	6.97773	7.5032	6.23317	8.16723	6.25236	7.02547	9.06219	5.18035	6.74486	6.43446	5.73325	24.3251	5.8595	5.53187	4.67719	7.15383	8.90298	6.27793	0.0517718	0.82839
chr11	1792443	1793121	7.02413	0.662248	0.97366	0.377042	0.180379	2.08333	4.23187	0.378788	1.26037	5.10152	0.451987	0.338542	0.466667	0.240992	0.196537	2.23453	0.436518	11.3684	0.145967	3.66541	chr11	1791607	1793607	GLG1	19.1417	28.388	14.6532	17.647	30.731	18.0988	22.6987	20.3963	16.3156	28.482	23.1015	25.8792	12.9627	14.0439	24.8095	19.6442	15.7208	22.7389	17.1602	24.9869	0.176155	0.457541
chr11	1877793	1878791	0.0712251	0.0434496	0.102627	0.137174	0	0.290698	0.203735	0	0.277778	0.0434028	0	0	0	0.0378788	0	0.0274048	0	0.0346741	0	0	chr11	1876834	1878834	MLKL	0	0.10564	2.06647	0	0.0840194	0.0636573	0.26755	1.12887	2.32253	0.22124	0	0.209834	0.0657856	0	0	0	0.349673	0.0947022	0	0.0383515	0.417769	0.0668203
chr11	1888210	1891790	15.9091	7.96135	48.2323	22.5352	8.80503	5.55556	6.74157	21.393	18.5095	23.5294	2.72727	22.956	4.86111	18.1818	10.7843	15.8228	31.3462	16.4444	32.5843	32.0833	chr11	1890906	1892906	WDR59	5.00881	3.94647	5.14902	3.46584	6.64762	4.2985	4.09227	4.01928	4.71673	2.87516	6.56001	3.92151	2.57772	4.46656	3.17955	2.76011	2.56099	3.97573	4.35931	3.76925	-0.137651	0.562777
chr11	2154193	2155132	0	0	3.33333	0	0	0	2.77778	0	0.793651	10.7143	0	12.5	0	0	0	0	7.14286	4.7619	0	0.943396	chr11	2152520	2154520	AMFR	110.442	54.611	24.8007	57.9876	22.0926	18.292	14.9443	19.6313	18.8078	11.7522	21.832	17.0534	49.8168	25.3919	81.8025	22.8273	24.5762	20.0011	22.5936	21.7318	-0.354748	0.124847
chr11	2430318	2430880	0.0413565	0	0.0343171	0	0.642331	0.0664666	0.0488759	0	0.0920635	2.43902	1.13223	0	0.0600962	0.110988	0.0466418	1.50966	0.0294811	0	0	0	chr11	2430070	2432070	FBXL8	1.59164	9.50156	1.56654	2.93803	1.80808	2.1337	4.14427	3.33836	4.44353	3.93837	2.43373	6.56359	2.90316	3.40483	1.90311	2.52145	1.41293	2.79066	2.85873	3.56178	-0.0714498	0.76468
chr11	2430318	2430880	0.0413565	0	0.0343171	0	0.642331	0.0664666	0.0488759	0	0.0920635	2.43902	1.13223	0	0.0600962	0.110988	0.0466418	1.50966	0.0294811	0	0	0	chr11	2430070	2432070	TRADD	2.47509	6.77106	5.24526	2.79234	0.826427	2.77931	2.57911	5.71015	6.82054	2.80985	0.862327	4.20231	2.6247	3.59309	3.60677	1.75642	2.85152	4.4241	2.33391	5.64172	-0.418355	0.0663996
chr11	2959448	2960889	0.0292398	0.0298864	0	0.28169	0	0	0.0342935	0	1.92513	0.0196386	0.0355114	0	2.5431	0	1.44928	0.0176056	0	0.0323206	2.08174	0.0228938	chr11	2958314	2960314	SLC12A4	9.60883	15.0149	17.4039	14.7426	20.448	13.5968	25.5206	23.6104	23.122	21.6142	19.6557	15.4539	11.8324	17.0815	13.2411	10.9351	26.0079	15.916	23.263	23.4706	-0.0418678	0.860877
chr11	3161578	3162518	9.0198	4.13546	2.01024	5.0211	6.05014	5.625	11.9679	8.72813	3.52122	2.28823	9.73248	11.5892	12.057	6.31022	19.7786	9.90254	2.43858	7.79345	8.09238	2.44178	chr11	3160502	3162502	ENSGALG00000028008,IRX6,MMP2	0.735752	1.54853	3.88608	1.00382	0.543449	0.484728	1.38727	2.49443	4.28256	3.67419	0.378197	3.29398	0.620367	0.292971	0.447262	0.437933	1.18305	1.7825	3.37497	4.66189	-0.457677	0.0424458
chr11	3161578	3162518	9.0198	4.13546	2.01024	5.0211	6.05014	5.625	11.9679	8.72813	3.52122	2.28823	9.73248	11.5892	12.057	6.31022	19.7786	9.90254	2.43858	7.79345	8.09238	2.44178	chr11	3160502	3162502	MMP2	24.8992	4.74472	7.98145	142.147	4.84599	114.972	43.4733	168.317	32.5809	54.664	4.22559	96.9658	7.50624	108.577	16.0098	7.15921	30.936	121.589	52.2695	65.4514	-0.0970751	0.683903
chr11	3161578	3162518	9.0198	4.13546	2.01024	5.0211	6.05014	5.625	11.9679	8.72813	3.52122	2.28823	9.73248	11.5892	12.057	6.31022	19.7786	9.90254	2.43858	7.79345	8.09238	2.44178	chr11	3160502	3162502	ENSGALG00000003583	0	0	0	0	0	0	0	0	0.131606	0	0.183767	0	0	0	0	0	0	0.181425	0.148184	0	0.013487	0.954996
chr11	3161578	3162518	9.0198	4.13546	2.01024	5.0211	6.05014	5.625	11.9679	8.72813	3.52122	2.28823	9.73248	11.5892	12.057	6.31022	19.7786	9.90254	2.43858	7.79345	8.09238	2.44178	chr11	3160502	3162502	IRX6	0	0	3.75688	1.69378	0	2.8003	0.683899	11.3833	0.328648	0	0.282301	0.946827	15.0171	4.60467	0	0	9.88541	7.39499	11.5026	2.0205	0.0181263	0.939539
chr11	4491463	4491938	0	0.175439	0	0.107759	0	0	0	0	0	0	0	0	0	0	0	0.191571	0	0	0	0	chr11	4489828	4491828	CHD9	18.5974	17.1002	8.23048	9.45829	11.6576	8.1755	5.87355	8.23937	15.0638	7.37857	11.0863	8.70661	5.26079	10.9385	7.63464	5.98406	6.3109	8.55704	10.4755	15.5414	0.0942648	0.692619
chr11	5414387	5420812	5.82473	7.07124	7.55475	8.60309	5.54184	6.07462	5.13454	10.7873	5.44787	6.95792	6.16775	7.62076	4.64158	11.5703	4.1693	21.821	6.33234	13.4363	6.71549	5.01399	chr11	5412705	5414705	SALL1	0.045443	19.1384	0.0773132	0.176979	4.9082	3.1005	5.69448	0.20451	0.635375	4.81364	5.86522	3.63727	24.2494	0.0134757	24.879	3.92217	0.183949	0.192131	4.58115	0.61777	-0.29749	0.202725
chr11	6135107	6135753	0.272255	1.51515	1.8195	0.482139	0.874781	0.408497	5.35088	6.84278	2.0679	2.75794	0.583215	0.712251	1.04473	5.57692	2.80264	0.224014	0.911458	0.916413	2.82051	2.8	chr11	6133569	6135569	CNEP1R1	13.6812	9.10249	5.82967	9.93546	5.94143	6.16614	11.6485	7.50495	8.18243	8.45551	5.16944	4.86529	4.23657	9.9279	5.87052	4.17087	7.03182	7.45997	6.4866	8.80564	0.304731	0.191423
chr11	6522685	6528682	6.16976	6.9097	11.4191	5.82881	8.48253	6.85161	5.2561	17.0528	12.3658	6.6938	6.9786	16.3289	3.82421	8.46503	6.79395	10.5195	10.0869	15.2567	4.83776	12.1842	chr11	6522057	6524057	CBLN1	0.266109	0.0936028	0.0841397	0.261912	6.2595	0	1.08512	0.0414356	0.617106	0.127516	3.22047	0.896435	2.46215	0	0.34365	1.0958	0.573203	0.672503	4.0782	0.299743	-0.264718	0.259364
chr11	6522685	6528682	6.16976	6.9097	11.4191	5.82881	8.48253	6.85161	5.2561	17.0528	12.3658	6.6938	6.9786	16.3289	3.82421	8.46503	6.79395	10.5195	10.0869	15.2567	4.83776	12.1842	chr11	6522057	6524057	ENSGALG00000028198	0	0	0	0	5.96891	0	0.933169	0	0.906167	0	12.11	2.51922	5.53477	0	0	0	0	0	8.49206	0	-0.304205	0.192229
chr11	7141263	7143191	1.67864	1.63655	4.33239	1.58798	0.198413	1.93452	2.14785	1.37615	2.49566	1.24165	0.253165	4.01594	0.594304	1.2799	1.89394	2.46763	4.44444	2.95153	3.64265	1.7397	chr11	7140795	7142795	NETO2	8.13401	0.079855	0.0596271	2.78789	24.6232	0.119745	0.264022	0.0842567	0.0871608	0.182771	22.452	0.230674	0.609039	0.277177	0.23716	0.758496	0.300963	0.100149	5.48912	0.0819752	-0.49114	0.0278736
chr11	7311680	7313008	0.0197006	0.864846	2.48016	0.0683995	0.197855	0	0.952381	0	3.67139	0.0617284	0.0610501	6.37195	0.0519751	0.106838	0.0631313	0.0804924	1.78908	0.122549	1.11346	0.0462963	chr11	7310584	7312584	VPS35	27.6695	26.3787	15.059	18.0982	42.8495	15.0458	33.3219	22.5392	19.7434	17.317	41.2408	19.6367	12.3799	27.4284	18.4713	13.3193	16.1342	17.3049	17.2255	25.9895	-0.166925	0.481804
chr11	7311680	7313008	0.0197006	0.864846	2.48016	0.0683995	0.197855	0	0.952381	0	3.67139	0.0617284	0.0610501	6.37195	0.0519751	0.106838	0.0631313	0.0804924	1.78908	0.122549	1.11346	0.0462963	chr11	7310584	7312584	ENSGALG00000004428	2.85812	2.31901	0.799571	2.29502	7.82984	1.66541	2.33106	1.63208	1.70799	0.841706	9.90988	1.22187	0.850109	2.22768	2.41181	1.53347	1.16317	1.68102	1.78531	3.14035	-0.252155	0.28349
chr11	7350762	7351493	0.0891266	0.140772	1.08073	0	3.1357	0.390625	0.757576	0.643225	0.770545	1.90092	0.486685	0.53267	0.0698812	0.108225	0	0	1.0427	0	0.246255	0	chr11	7348941	7350941	SHCBP1	0.0687778	0.692461	5.89498	0.450138	0.453039	0.322456	12.1956	1.15847	1.2273	1.25475	0.78897	1.11562	0.170334	0.319084	0.147485	0.275799	4.12871	0.652508	0.568674	0.307768	0.19854	0.401397
chr11	9334481	9338955	2.89841	5.65151	1.60861	4.32864	6.8705	4.75657	2.72737	5.54177	3.61961	3.98957	5.80053	5.65748	3.78038	5.48369	2.23863	3.22811	4.07781	5.66998	5.8185	4.20469	chr11	9336609	9338609	PDCD5	102.883	22.064	6.86438	49.105	18.7829	20.9048	24.2511	18.5684	15.0268	12.1945	19.0594	12.6965	8.84631	31.2947	12.0441	14.9713	9.75665	16.8474	13.1628	21.2473	-0.124992	0.599545
chr11	9385373	9386840	32.5631	9.40439	38.5186	24.232	21.2292	32.0635	31.8158	30.3746	16.1772	33.6918	30.6225	31.2717	26.2611	25.3402	28.1378	29.5414	23.8455	27.3114	32.5441	35.4622	chr11	9384093	9386093	RGS9BP	2.16232	1.64509	1.47902	1.20993	7.01636	0.913555	0.948722	1.13987	1.49317	1.33782	5.42663	0.674507	7.61991	21.4445	0.827545	1.23057	6.19436	1.10135	22.2763	1.46932	-0.0307079	0.89774
chr11	9395566	9396387	0	0.905797	0	0	0	0	0	4	3.48837	0	0	2.65152	0	0	0	1.26582	2.7027	2.7027	0	0	chr11	9394884	9396884	NUDT19	9.23581	3.48289	1.16034	3.89362	2.863	1.24799	1.23862	0.888901	1.71524	1.94519	3.70108	2.04827	1.57206	0.690647	1.66974	1.84643	0.838474	1.23345	3.75603	5.08517	-0.346931	0.133972
chr11	9467245	9468332	0.0138581	0	0.016605	0.012219	0.0673137	0.0568978	0.0382959	0.900848	0	0.013986	0.0240936	0.0240732	0	0.0245459	0.021796	0.0600729	0	0.0315384	0	0	chr11	9468142	9470142	RHPN2	0.250307	46.9161	0.432423	0.316339	0.729252	3.60034	3.51437	0.356928	0.701864	1.4438	0.469175	3.38668	14.7384	0.439982	47.8367	9.97155	22.9098	0.458522	5.41545	0.768925	-0.150429	0.526708
chr11	9496831	9503630	3.0303	1.62841	8.51093	0.195286	9.47384	4.65226	1.86032	4.93421	2.65485	2.93553	8.98809	2.5641	1.88679	0	0	0	5	0	2.08123	0.208333	chr11	9501120	9503120	GPATCH1	9.8519	11.2909	5.15995	6.24785	3.91851	6.03034	5.73619	4.57512	9.35191	3.25875	4.18454	4.27152	4.87014	7.9824	6.50197	5.59661	5.9984	5.85404	3.17787	6.49609	-0.342282	0.139617
chr11	9777887	9783058	23.5556	9.96477	9.46429	51.3043	48.113	29.1667	26.754	37.0215	26.9687	44.7519	53.2143	26.1772	6.78082	23.8889	33.9326	16.0038	38.1114	25.641	43.5317	35.2873	chr11	9776731	9778731	ENSGALG00000027621	0	1.90746	1.25939	0.896205	0	0	0	1.0054	0.344613	0.603485	0	0.413831	0.564037	0	0.603454	0	2.12224	2.17941	0.288943	0.620094	-0.179087	0.449967
chr11	9777887	9783058	23.5556	9.96477	9.46429	51.3043	48.113	29.1667	26.754	37.0215	26.9687	44.7519	53.2143	26.1772	6.78082	23.8889	33.9326	16.0038	38.1114	25.641	43.5317	35.2873	chr11	9778740	9780740	EBP	2.26132	51.8292	74.721	10.857	1.31509	5.78687	2.10064	28.0037	9.29559	1.51707	0.807742	30.2943	11.6165	3.1386	0	3.24173	22.3105	55.3271	8.94869	6.11705	-0.477733	0.0331442
chr11	9794891	9796700	3.88659	11.5369	15.0491	7.3129	9.33543	4.23497	10.2439	8.94809	16.0031	14.176	5.20035	6.49323	14.3186	8.78216	8.04874	8.85867	16.8966	6.0373	14.2374	11.1954	chr11	9794416	9796416	C	36.1275	11.9008	8.1592	14.9057	7.48302	9.0454	6.11397	12.2252	6.00456	7.38737	7.20753	10.2157	7.12947	6.90552	7.39303	6.84057	7.94643	13.198	9.60585	23	-0.388687	0.0903258
chr11	10450297	10451703	0	0.05227	0.103199	0.0506073	0.0546448	0	0.4329	1.63934	0.460879	0.0263158	0	0	0	0	0.0710227	0	0	0.294118	0.0150022	0.0485673	chr11	10448311	10450311	GPI	1173.17	100.35	22.936	415.72	124.198	25.2197	59.6488	56.0257	26.4396	32.9595	130.781	39.2855	39.9613	96.588	40.4016	15.2758	16.8011	27.6751	158.384	33.7271	-0.132688	0.577073
chr11	10628410	10629350	0	2.7027	5.26316	0.139102	0	0.574713	0.617284	4	3.80952	0.096432	0.378788	0	0	0.14881	3.7037	2.27273	0	6.52174	0.114286	0.234192	chr11	10628358	10630358	ENSGALG00000005114	3.24197	700.178	2.42527	4.20043	3.5108	16.2941	20.6912	7.76422	3.50416	10.5206	2.28131	52.619	290.122	16.5148	2.88875	11.4165	28.3683	4.60391	9.86745	2.43492	0.0343103	0.885815
chr11	10672369	10673674	19.7917	3.41727	27.6042	13.006	11.7782	5.61404	7.71242	21.9149	11.4413	12.5735	14.2364	1.25	4.70588	12.6344	13.8889	9.1453	18.75	18.75	16.3939	20.5782	chr11	10670969	10672969	RRAD	5.85597	0.553112	0.327013	9.33711	2.66127	0.446775	5.33354	0.805033	0.517033	0.421859	2.98464	2.39859	3.59726	134.457	0.341324	0.448816	2.43413	2.20783	3.30658	1.80783	-0.0233815	0.922055
chr11	10786530	10787212	1.18914	0.109155	2.32294	2.21493	1.12089	2.72486	0.281641	6.39803	0.0674764	0.271739	0.707932	0.95671	1.28982	0.771007	0.140056	0.543478	3.47256	3.47499	1.15942	0	chr11	10784609	10786609	NAE1	15.4968	12.2316	4.46676	10.998	10.3542	7.65112	11.0041	6.45879	8.11547	5.21234	10.5446	5.8148	5.80804	12.2154	7.44979	4.28425	4.27869	5.63253	5.42502	7.96847	-0.293422	0.209264
chr11	10922738	10924546	70.9309	17.3407	62.7667	56.6612	64.1884	52.2854	61.8165	54.2158	32.166	62.0123	59.8616	59.2149	64.5925	55.0413	62.3945	54.7038	65.2791	60.7114	61.7481	55.8768	chr11	10923285	10925285	BEAN1	5.77529	1.98848	0.824131	8.485	8.64527	5.65018	7.20925	6.12206	7.63691	13.2904	11.8031	3.09872	2.88753	1.53456	28.251	0.595581	6.06292	6.74208	7.11322	2.5902	0.208982	0.376567
chr11	13423533	13424697	0.0390625	0.0308355	0	0.152905	0	0.19685	0.0155087	0.0641026	0.295124	0.0401033	1.53321	1.7094	0.113137	0	0	0.228481	0	0.0362845	0	0	chr11	13421698	13423698	NUDT7	16.5993	17.8066	3.97923	10.755	6.36258	8.08358	8.17117	6.15879	6.12751	5.6491	6.10689	4.42935	9.44371	13.8763	9.81895	7.38774	5.91478	5.00933	5.10882	4.50186	-0.246823	0.294134
chr11	13443803	13444892	3.23612	2.71178	0.825333	1.38147	0.229083	0	5.2597	12.8554	4.27033	16.5864	1.17791	3.81099	7.33021	1.26012	0.487425	0.674107	0.848136	5.62607	0.243297	6.13953	chr11	13442021	13444021	VAT1L	0.188073	0.283657	3.18214	2.49099	69.0093	1.56022	22.6581	1.98937	1.8466	6.0994	44.1635	3.31173	0.970749	21.3793	0.58673	2.61055	1.45196	1.73986	27.7759	3.58932	-0.261615	0.265198
chr11	14841597	14842454	0	0	0	0	0	0.329746	0.137741	0.16317	0.529495	0	0.555556	1.11111	0	0	0.292398	0	0	0	0	0	chr11	14839773	14841773	ATMIN	15.3535	7.02961	5.37801	8.90458	7.56946	6.46024	6.63147	7.86155	8.84566	4.07467	8.027	6.02319	5.38249	10.4612	8.15441	5.26126	7.23576	7.43449	6.89302	12.2625	-0.117795	0.620879
chr11	14881176	14882301	5.89339	0.633039	6.05159	4.79888	2.44002	0.459137	1.28324	2.93333	0.905632	1.78389	2.85931	2.73115	4.34117	4.42431	1	0.599892	7.4495	2.39218	10.0796	5.40134	chr11	14880015	14882015	ENSGALG00000005435	0	0	0.0058799	0	0.0095453	0.0226655	0.00923318	0.197638	0.00816415	0	0.0111185	0.266922	0.0314318	0.0111482	0	0.0374951	0.032229	0.199311	0.0500905	0.149112	0.0244173	0.918613
chr11	14938412	14939310	5.40541	1.18343	3.84615	5.37634	0.549451	1.92308	2.69231	7.40741	1.9802	7.8125	0.411523	11.3095	6.45161	1.6129	4.70085	0	1.28205	0	3.22581	0.877193	chr11	14936770	14938770	GAN	4.96336	4.75934	2.69252	3.24449	5.91139	4.30119	5.42782	31.6509	4.50908	3.95468	5.62172	4.95915	5.48039	3.76547	3.92916	2.00071	4.89772	14.0536	3.5642	17.0635	0.11529	0.628377
chr11	14994325	14995957	0.754717	0.188324	1.70807	0.122063	0.687799	0	0	0.320513	0.265369	0.0173551	0.127877	0	0	0.357578	0	0	0.378788	0	0.570523	0.955743	chr11	14993041	14995041	CMIP	4.03727	18.5933	13.3145	5.22153	13.5878	11.2424	4.03965	12.9913	17.6613	7.35519	13.0337	15.9028	9.52134	4.44969	10.2569	6.15955	8.71533	16.6664	6.69439	11.0069	0.0318832	0.893847
chr11	16301295	16304555	7.28555	5.66748	16.9525	3.58289	3.82548	10.3931	3.45159	7.83239	8.25032	12.811	3.03247	14.6253	5.98516	12.9829	9.99114	9.03416	13.7478	9.7239	6.67659	17.0873	chr11	16299761	16301761	ENSGALG00000020995,KLHL36	67.1076	7.36446	23.5726	33.4306	31.7487	16.2364	23.0214	9.17523	22.5902	20.0942	20.0748	16.4407	12.1723	9.81117	52.5271	10.9016	6.35803	12.8023	10.379	9.11281	-0.22843	0.332703
chr11	17486049	17486921	0	0.211864	0	0	0	0	0	0	0	3.7037	0.416667	0	0	4.54545	0	0	0	0	0	1	chr11	17484302	17486302	BANP	7.50002	7.24404	14.9833	10.0642	7.90164	10.1282	8.18066	7.52612	13.2254	6.00976	5.23258	9.25676	6.95603	9.52682	10.2814	8.058	11.7337	10.1443	5.11162	11.5084	-0.135069	0.570194
chr11	18032040	18036217	15.7748	30.6851	35.8365	37.6978	22.5637	14.2756	25.8676	48.9802	43.0596	31.9456	20.6272	40.744	48.9039	40.0335	7.23734	25.057	34.9387	31.838	32.5187	41.6909	chr11	18033799	18035799	ACSF3	0.899978	8.70827	4.66467	1.4962	3.42233	3.19401	3.49397	2.5549	2.84461	1.7241	4.08549	3.32377	6.59305	6.6762	3.56623	3.04187	2.68617	1.85859	2.51766	1.29213	0.135775	0.568162
chr11	18309432	18327350	41.558	33.1679	50.65	39.7651	56.5346	45.3943	38.5569	50.8108	38.587	37.9792	49.3801	39.0134	40.935	49.3832	33.9587	39.3249	51.08	42.7692	47.2624	49.9356	chr11	18308976	18310976	CDH3	0.535775	1.05151	0.134379	7.54682	1.81334	3.84149	21.1835	23.0844	0.564177	4.16376	1.29009	10.2459	9.29259	0.854626	23.37	7.49209	32.4465	6.48794	33.7529	9.62982	0.0666122	0.780224
chr11	18309432	18327350	41.558	33.1679	50.65	39.7651	56.5346	45.3943	38.5569	50.8108	38.587	37.9792	49.3801	39.0134	40.935	49.3832	33.9587	39.3249	51.08	42.7692	47.2624	49.9356	chr11	18325996	18327996	ENSGALG00000026544	6.16117	5.39386	4.47188	5.91148	4.68611	4.06865	2.99863	4.15555	4.62468	1.2173	2.5622	3.2611	4.25406	4.16097	4.31998	4.28548	3.42642	4.654	5.20242	2.2736	-0.107385	0.652261
chr11	18309432	18327350	41.558	33.1679	50.65	39.7651	56.5346	45.3943	38.5569	50.8108	38.587	37.9792	49.3801	39.0134	40.935	49.3832	33.9587	39.3249	51.08	42.7692	47.2624	49.9356	chr11	18315542	18317542	CDH1	0	51.7887	0.23645	0.385669	0.125189	33.6044	0.894591	27.1815	0.252423	2.67779	0.0698907	43.9298	47.32	0.198677	67.8727	99.0899	31.0489	12.0624	8.67882	15.6115	-0.420647	0.0647725
chr11	19173315	19175178	0.0596446	0.620092	0.0492611	0.0265252	0.037594	0	0.093633	0	0.864583	0.0106929	0	0.151381	0	0.0510241	0	0.0152532	0	1.35135	0.760799	1.25786	chr11	19172540	19174540	ZNF821	17.0886	21.0804	22.8829	14.9901	31.1421	28.8952	27.1873	6.84587	30.2265	38.3891	28.7261	28.2308	22.4952	32.2921	35.5006	13.5354	25.7908	22.3488	14.6482	16.877	-0.198175	0.402281
chr11	19194020	19196693	0.621712	2.8318	6.63422	3.44757	2.02516	1.26174	3.38854	3.51018	5.73079	1.79383	2.18023	7.26257	1.20155	0.992063	2.58838	2.50276	2.55214	5.21694	2.02309	2.92906	chr11	19193701	19195701	AP1G1,PHLPP2	22.3256	33.8752	18.4674	15.0933	25.9446	21.1375	26.5647	18.3914	25.3325	17.2576	25.1002	19.9735	17.0884	19.2715	31.0103	15.1732	13.1251	16.3155	18.805	17.9266	-0.0411611	0.863203
chr12	84432	85039	1.51515	0	0	0.0648929	0	0.406504	0	0.152439	0	0.0793693	0	0	0.174216	0	0	0	0.285714	0	0.021322	0	chr12	82540	84540	POC1A	1.3853	5.29435	5.0565	2.17869	3.05081	3.36694	7.83079	2.83504	3.90083	2.70547	2.65389	3.34347	3.07394	5.25159	3.76639	2.37977	1.85674	3.28638	1.89533	2.29725	-0.376937	0.101369
chr12	529974	530436	0	0	0	0	0	0	0.406504	0	0	0	0.42735	0	0	0	0	0	0	0	0	0	chr12	528118	530118	RPL29	209.999	322.228	136.957	244.338	52.4028	276.686	321.483	146.522	348.374	172.754	42.1015	106.185	150.6	217.378	164.56	192.332	125.127	235.576	79.4753	119.452	-0.0190148	0.936581
chr12	543690	546232	23.1687	14.5404	36.9373	13.4437	28.2629	21.656	13.0291	17.8691	17.6439	18.1284	42.5199	24.3512	26.9301	18.1351	22.9512	16.5116	27.5156	21.5123	23.46	22.7894	chr12	543769	545769	NISCH	19.127	9.26417	6.3651	5.89479	15.479	7.45962	3.91434	4.37393	6.91261	7.37321	12.8414	7.87827	7.79888	8.9275	3.13329	4.6733	7.59574	8.34011	5.61393	13.7983	0.357565	0.12167
chr12	1739593	1740928	1.17424	1.40508	2.63889	5.91526	1.53792	0.78125	0.635776	0.118064	1.48871	1.81117	1.06011	2.47396	0.727273	0.520833	0.13587	0.249176	4.65278	0.835913	2.82738	1.51267	chr12	1738285	1740285	HEMK1	2.4556	7.51599	3.93266	3.393	1.84963	3.08043	4.57787	4.37361	5.0553	2.95768	2.54149	2.89325	2.92754	7.12973	4.34693	2.49985	2.98531	2.97981	3.62299	3.56211	-0.168368	0.47797
chr12	1831165	1841081	32.6274	19.6749	40.9087	22.3104	26.6	26.1192	24.1031	27.7883	27.1575	25.3138	28.9699	27.1302	25.4289	20.7539	22.0731	21.3218	33.8977	26.4761	35.4076	28.3513	chr12	1835780	1837780	MAPKAPK3	4.34905	18.5003	1.27717	5.62188	9.28883	31.1063	8.95584	17.7136	4.96411	6.46086	8.31706	7.56648	11.8355	11.1758	16.0578	16.9789	22.2046	14.1474	12.4607	20.5092	-0.233711	0.321337
chr12	2379405	2386538	49.9044	25.5804	58.5324	48.7924	60.4818	44.5862	39.3418	42.8938	40.5311	50.7551	55.6527	50.0948	52.4457	56.9893	56.2292	35.5748	52.3789	63.7482	51.7271	54.1904	chr12	2383802	2385802	IP6K1	11.6343	9.89265	29.7881	12.0512	15.625	14.4631	11.8553	14.2916	18.4308	11.2208	15.4778	15.4995	11.5924	13.6928	15.1228	10.9656	12.8266	15.6958	23.6075	14.1004	0.400707	0.0799702
chr12	2419703	2443738	51.5097	44.375	63.1725	52.4915	61.661	53.9965	52.0017	54.5838	50.7642	57.4077	62.43	54.0833	51.4005	57.7408	51.6031	49.607	63.0013	56.1431	57.3598	62.0531	chr12	2418905	2420905	CDHR4	0.136314	0	0.169469	0.343204	0.159087	0.665908	0.539334	0.334983	0.0980804	0.545689	0.628974	0.970218	0.288423	0.427811	15.0557	0	2.1769	0.34869	0.159475	0.261301	-0.111187	0.64073
chr12	2419703	2443738	51.5097	44.375	63.1725	52.4915	61.661	53.9965	52.0017	54.5838	50.7642	57.4077	62.43	54.0833	51.4005	57.7408	51.6031	49.607	63.0013	56.1431	57.3598	62.0531	chr12	2425446	2427446	UBA7	2.42155	7.31476	8.88941	6.02314	5.07139	7.51535	7.1905	5.97276	6.87257	5.58693	5.20867	9.43181	7.77383	6.48045	5.97891	5.07526	9.76064	9.69485	5.43265	0.715444	-0.0461905	0.846668
chr12	2419703	2443738	51.5097	44.375	63.1725	52.4915	61.661	53.9965	52.0017	54.5838	50.7642	57.4077	62.43	54.0833	51.4005	57.7408	51.6031	49.607	63.0013	56.1431	57.3598	62.0531	chr12	2433886	2435886	AMT	2.89446	133.284	14.848	10.6183	13.7837	20.8346	34.0777	7.58624	11.704	16.4134	13.1105	17.6675	25.7986	15.8289	18.0547	11.1242	16.7622	14.1269	9.5618	2.05699	-0.527341	0.0168766
chr12	2419703	2443738	51.5097	44.375	63.1725	52.4915	61.661	53.9965	52.0017	54.5838	50.7642	57.4077	62.43	54.0833	51.4005	57.7408	51.6031	49.607	63.0013	56.1431	57.3598	62.0531	chr12	2438898	2440898	DAG1	45.911	15.6867	8.90374	24.5747	18.8174	24.8163	29.7464	19.3752	10.852	46.2314	16.1814	27.9956	24.5742	22.7211	20.6254	19.6725	49.5403	23.7294	28.355	11.0731	0.029154	0.90289
chr12	2477123	2485748	48.7925	38.5322	72.0487	54.7608	58.8346	45.964	53.2222	51.5651	57.729	57.7285	56.356	56.6489	53.5828	55.5686	48.3696	44.5971	59.2671	55.2509	58.8129	59.538	chr12	2477298	2479298	MST1	4.67238	30.0062	4.4314	9.56968	1.11275	5.91899	3.8679	9.34699	2.53021	7.78346	1.51125	27.3393	6.25536	20.5636	2.97633	27.0543	12.3523	18.2585	3.94314	1.4252	-0.443026	0.050427
chr12	2477123	2485748	48.7925	38.5322	72.0487	54.7608	58.8346	45.964	53.2222	51.5651	57.729	57.7285	56.356	56.6489	53.5828	55.5686	48.3696	44.5971	59.2671	55.2509	58.8129	59.538	chr12	2477298	2479298	APEH,MST1	14.5778	23.7013	12.7126	11.8015	9.9362	13.3847	14.2765	11.795	10.2257	10.8511	9.36277	13.6082	24.7649	17.552	19.2855	17.6595	6.57164	9.08418	13.5256	2.80405	-0.557284	0.0106887
chr12	2493405	2505472	71.2083	53.7986	79.0122	66.1986	68.6469	67.5701	67.7968	71.339	68.6193	66.6058	68.5199	66.9953	74.6664	70.8422	72.2079	68.8264	73.6324	66.151	68.5435	67.3739	chr12	2491822	2493822	BSN	0.164818	0.0938043	0.653343	0.19262	16.5174	0.32837	0.210525	0.500557	0.195881	0.512815	14.9832	0.963158	0.153894	0.139968	0.0230654	0.156941	0.192922	0.320667	3.17784	0.400777	-0.0205001	0.931638
chr12	2547664	2550158	46.25	11.6438	39.6104	24.2424	1.33333	45.4186	18.8715	25.4067	20.6712	50	34.375	44.7368	44.3182	65	15.3309	50	20.8333	30.5882	37	73.6842	chr12	2547853	2549853	TRAIP	0.0958907	0.277526	4.41638	0.252727	2.28701	0.0731043	6.73272	0.913126	0.788909	0.732485	2.86256	0.836667	0	0.181753	0	0.164223	0.181041	0.631528	0.177541	0.0578099	-0.281001	0.230091
chr12	2567352	2588699	29.389	31.2145	43.0415	30.0521	37.7836	28.7928	28.5866	38.5832	32.0474	35.0377	39.9868	38.5933	32.2722	38.1242	27.9856	32.3241	40.632	34.8126	36.9693	41.388	chr12	2566475	2568475	CAMKV	0.138366	0.173829	0	0	196.388	0.115804	0.136042	0.0815718	0	0.0805902	94.0613	0	0.138326	0.163879	0	0	0	0.086908	0.218577	0.16043	0.243199	0.301509
chr12	2567352	2588699	29.389	31.2145	43.0415	30.0521	37.7836	28.7928	28.5866	38.5832	32.0474	35.0377	39.9868	38.5933	32.2722	38.1242	27.9856	32.3241	40.632	34.8126	36.9693	41.388	chr12	2577805	2579805	MST1R	0.544741	1.10649	6.18847	1.85006	1.59497	6.13369	1.1163	5.8274	0.800226	2.04213	0.839032	7.45815	1.95884	0.530241	5.11468	0.388147	3.00671	5.67866	1.42647	3.64026	0.238751	0.310709
chr12	2567352	2588699	29.389	31.2145	43.0415	30.0521	37.7836	28.7928	28.5866	38.5832	32.0474	35.0377	39.9868	38.5933	32.2722	38.1242	27.9856	32.3241	40.632	34.8126	36.9693	41.388	chr12	2586356	2588356	MON1A	33.1948	15.6778	11.4205	25.5671	15.5911	10.2973	11.0137	9.24881	6.46725	7.59633	14.4074	9.23742	20.1928	16.4101	12.0863	9.04326	13.2434	8.4147	13.4946	2.96456	-0.345307	0.135925
chr12	2987881	2988581	0	1.66667	0	0	0	0.161031	0	0.697674	0.180832	0.0524109	0	0.143472	0.408163	0.162602	0	0	0	0	0.0782645	0	chr12	2986553	2988553	GLYCTK	8.02853	24.4333	6.87348	4.31282	2.85386	2.26262	4.17021	2.39372	5.13605	3.7666	3.58104	4.4582	10.6185	1.95475	10.5419	6.30297	4.91897	1.88093	3.53698	2.05377	0.766157	8.19051e-05
chr12	2987881	2988581	0	1.66667	0	0	0	0.161031	0	0.697674	0.180832	0.0524109	0	0.143472	0.408163	0.162602	0	0	0	0	0.0782645	0	chr12	2986553	2988553	GLYCTK	0.862973	5.96103	0.819796	0	2.45764	0.0888169	0	0.310591	0	0	1.90196	0.0173546	1.91802	0.282067	6.39237	0.927411	0.836065	0	0.776056	0.770337	0.491453	0.0277592
chr12	3116997	3117826	0	0.574713	0	0.909091	4.7619	4.7619	13.3333	2.27273	15.5377	17.8571	4.54545	1.47059	0	9.09091	11.7647	12.6984	16.1765	26.1364	12.8205	29.1667	chr12	3116614	3118614	SEMA3G	3.31894	0.951456	2.32798	7.41267	13.278	5.27106	2.31748	20.3307	2.58689	3.7301	12.2025	5.4251	0.96613	22.3608	2.20103	1.51538	4.03821	5.91418	12.0661	3.61187	-0.134869	0.57077
chr12	3124907	3132050	55.3369	47.739	71.8422	57.9541	72.7798	57.2749	54.1342	59.1879	61.6236	54.3752	62.7144	60.1325	50.8755	63.7247	59.7879	64.0684	64.458	63.4407	62.3362	54.8977	chr12	3124675	3126675	ENSGALG00000027588	58.2603	93.7206	7.37135	34.8717	5.49026	18.0481	14.7273	12.0567	9.78177	9.7147	6.14643	19.9386	177.128	13.1199	11.1365	6.12866	8.17417	9.77702	13.6721	1.74632	-0.59201	0.00596013
chr12	3124907	3132050	55.3369	47.739	71.8422	57.9541	72.7798	57.2749	54.1342	59.1879	61.6236	54.3752	62.7144	60.1325	50.8755	63.7247	59.7879	64.0684	64.458	63.4407	62.3362	54.8977	chr12	3128958	3130958	ENSGALG00000027695	0.458161	1.48609	0.82527	0.27323	0.241754	2.17979	0.737993	0.823325	0.929352	1.80205	0.934596	0.80907	0.66516	10.6922	0	0.796336	0.518565	0.138019	14.2063	0	0.115543	0.627617
chr12	3124907	3132050	55.3369	47.739	71.8422	57.9541	72.7798	57.2749	54.1342	59.1879	61.6236	54.3752	62.7144	60.1325	50.8755	63.7247	59.7879	64.0684	64.458	63.4407	62.3362	54.8977	chr12	3128958	3130958	ABHD14A	1.24001	3.32168	0.930402	2.85795	0.345322	2.78053	1.57568	2.17375	1.47464	1.94625	2.36082	2.26439	4.30753	2.40062	4.89375	0.566151	0.70809	2.72246	1.92333	0.152194	-0.455005	0.0438235
chr12	3124907	3132050	55.3369	47.739	71.8422	57.9541	72.7798	57.2749	54.1342	59.1879	61.6236	54.3752	62.7144	60.1325	50.8755	63.7247	59.7879	64.0684	64.458	63.4407	62.3362	54.8977	chr12	3128958	3130958	GPR61	1.08213	0.861828	3.08631	1.22827	4.84137	1.85073	0.769405	0.535255	1.94737	1.54748	7.28479	2.01557	0.612807	0.568308	0.771164	0.228014	1.42677	0.764643	2.47563	0.272223	0.480672	0.031927
chr12	3139901	3140700	86.8059	78.7037	88.8806	86.0278	83.2244	85.0586	83.9275	87.3423	93.9394	81.0152	74.4923	88.32	86.1728	86.3352	83.7289	74.5356	89.0924	87.2465	83.3513	86.6009	chr12	3139836	3141836	RBM5	50.5774	54.6132	54.4683	37.8876	59.2955	77.6996	46.3928	32.1096	88.3552	37.6433	56.7978	55.8385	32.5903	60.7274	89.779	40.9689	52.4113	54.5602	45.9417	39.5797	0.224137	0.342117
chr12	3139901	3140700	86.8059	78.7037	88.8806	86.0278	83.2244	85.0586	83.9275	87.3423	93.9394	81.0152	74.4923	88.32	86.1728	86.3352	83.7289	74.5356	89.0924	87.2465	83.3513	86.6009	chr12	3139836	3141836	PARP3	6.28846	5.28654	4.62172	8.31675	0.509393	9.39645	4.29287	7.03141	6.83691	3.56254	1.09883	8.06481	6.65187	2.60965	5.7353	4.66182	5.02388	6.25022	5.51129	2.55619	0.430287	0.0582588
chr12	3291915	3294394	3.64288	5.45167	3.26638	3.27022	4.1453	2.85929	2.7803	6.23084	6.14637	4.14502	3.59712	5.30045	2.3744	0.0198413	3.26904	3.43738	2.38994	1.06477	2.37535	2.52616	chr12	3291873	3293873	ENSGALG00000004676	2.50123	4.41643	4.41818	1.98384	3.24691	3.23307	4.86235	3.08594	5.30423	4.26404	3.16431	1.86106	5.50005	6.60885	4.18349	8.93587	1.17249	2.74344	5.87818	4.4688	-0.181654	0.443388
chr12	3309049	3310224	0.391319	7.50651	1.39527	0.160982	2.5	0.0727273	1.79159	2.61298	6.53854	9.93931	4.32334	1.09794	2.32384	0.973658	3.41352	0.36859	0.0445633	0.694445	0.771277	0.0694445	chr12	3307393	3309393	IPPK	7.14951	4.57331	2.52111	3.85427	5.19245	3.06714	4.01429	3.32039	4.58181	3.01852	4.96872	3.65163	2.30838	4.80888	5.49109	2.70828	5.13444	3.89886	2.66355	4.6281	-0.0112726	0.962379
chr12	3309049	3310224	0.391319	7.50651	1.39527	0.160982	2.5	0.0727273	1.79159	2.61298	6.53854	9.93931	4.32334	1.09794	2.32384	0.973658	3.41352	0.36859	0.0445633	0.694445	0.771277	0.0694445	chr12	3307393	3309393	ECM2	2.34971	0.184624	1.67858	15.8525	0.309863	16.4029	5.3075	8.72901	2.04352	8.21365	0.292194	7.41853	0.891598	3.91638	1.49545	0.767708	2.319	11.8916	5.07402	22.8026	-0.316229	0.174362
chr12	3309049	3310224	0.391319	7.50651	1.39527	0.160982	2.5	0.0727273	1.79159	2.61298	6.53854	9.93931	4.32334	1.09794	2.32384	0.973658	3.41352	0.36859	0.0445633	0.694445	0.771277	0.0694445	chr12	3307393	3309393	ASPN	3.05926	0.160169	1.28749	14.6047	0.119783	40.3555	1.95181	7.92551	0.770489	2.39527	0.0485492	1.21506	0.0990716	3.42147	0.532093	0.442112	1.11397	15.9667	1.39044	26.4713	-0.369602	0.108742
chr12	3309049	3310224	0.391319	7.50651	1.39527	0.160982	2.5	0.0727273	1.79159	2.61298	6.53854	9.93931	4.32334	1.09794	2.32384	0.973658	3.41352	0.36859	0.0445633	0.694445	0.771277	0.0694445	chr12	3307393	3309393	OMD	0.0404661	0.0419871	1.36643	0.349123	0.0412019	0.110165	0.323625	0.112795	0.754102	0.346868	0.0199699	0.188681	0.019518	0.0622493	0.0167508	0.0254859	0.0431024	0.0996668	0.113218	0.360431	0.110021	0.644257
chr12	3309049	3310224	0.391319	7.50651	1.39527	0.160982	2.5	0.0727273	1.79159	2.61298	6.53854	9.93931	4.32334	1.09794	2.32384	0.973658	3.41352	0.36859	0.0445633	0.694445	0.771277	0.0694445	chr12	3307393	3309393	OGN	8.02446	0.577758	1.31943	42.0141	0.233765	22.8568	12.7896	2.91347	10.7707	24.3052	0.150481	24.7318	3.16767	5.37047	1.15953	5.49975	4.39796	22.8697	8.80939	16.0431	-0.136801	0.565213
chr12	3309049	3310224	0.391319	7.50651	1.39527	0.160982	2.5	0.0727273	1.79159	2.61298	6.53854	9.93931	4.32334	1.09794	2.32384	0.973658	3.41352	0.36859	0.0445633	0.694445	0.771277	0.0694445	chr12	3307393	3309393	CENPP	0.813812	0.238921	5.85232	0.901185	0.148154	0.695503	6.78689	1.214	1.11222	1.61398	0.371801	0.879447	0.288257	0.381876	0.341297	0.674962	0.459675	0.807562	0.591609	0.916973	-0.0357215	0.88115
chr12	3452322	3452945	0	0	0	0	0	0	0	0	0	0	0.268817	0	0	0.549451	0	0	0	0.2331	0	0	chr12	3450665	3452665	ENSGALG00000021144,NOL8	5.22236	5.67675	4.41839	4.25655	4.17608	3.79137	4.92146	4.7535	7.49574	3.25453	3.6019	4.03858	2.26175	4.6664	5.63785	3.45347	2.65129	4.20804	2.82936	9.55067	-0.0589529	0.804998
chr12	3499283	3503027	5.43193	2.44205	5.52274	3.67668	11.325	5.63297	1.82678	1.1553	8.81551	3.79654	10.3272	4.89607	6.25303	4.52951	1.07645	1.76809	8.37241	5.25621	5.5672	4.11699	chr12	3500365	3502365	IARS	29.5905	13.1513	6.45921	16.8957	10.9255	9.23666	11.4948	11.0437	9.2542	4.56376	10.4918	8.15245	5.1536	10.1695	8.04508	7.20685	4.34611	6.94064	6.90269	11.1916	-0.0649259	0.785662
chr12	3499283	3503027	5.43193	2.44205	5.52274	3.67668	11.325	5.63297	1.82678	1.1553	8.81551	3.79654	10.3272	4.89607	6.25303	4.52951	1.07645	1.76809	8.37241	5.25621	5.5672	4.11699	chr12	3500365	3502365	SNORA84	0	0	0	694.612	0	162.164	0	1428.5	426.317	0	0	0	110.775	0	0	6153.41	0	36.0625	0	366.565	-0.337158	0.146031
chr12	3611505	3613335	0	2.52134	14.0351	3.76344	5.23256	2.35294	6.54762	1.72414	6.18812	8.03571	3.94737	8.33333	4.03226	2.85714	0	10.0358	6.56566	3.84615	9.25084	0	chr12	3609878	3611878	ATP2B2	0.722462	1.1407	1.49805	0.996891	172.973	4.45718	6.02603	4.93152	0.87413	17.0311	132.378	2.78422	0.667193	12.239	54.3445	0.123658	0.813685	3.41536	24.1698	1.5434	-0.0726554	0.760819
chr12	4229573	4230333	1.38889	0.672691	0.116144	0.479532	0.203252	0.37037	1.45985	1.81239	3.7102	0	0.0919118	0	0.757576	0	0.462963	0.488355	0.555556	6.89655	2.73148	1.10092	chr12	4227707	4229707	SLC6A1	0.17219	0.0687358	0.0758809	0.176563	94.9841	0.200909	0.048415	0.121219	0.236863	0.0821674	89.5526	0.269268	0.186528	0.0932008	1.06148	0.203944	0.0696021	0.239058	32.5839	0.148952	-0.150274	0.527138
chr12	4229573	4230333	1.38889	0.672691	0.116144	0.479532	0.203252	0.37037	1.45985	1.81239	3.7102	0	0.0919118	0	0.757576	0	0.462963	0.488355	0.555556	6.89655	2.73148	1.10092	chr12	4227707	4229707	HRH1	1.35289	0.180069	0.195985	3.90246	0.964821	1.66878	0.545995	2.63261	1.01526	0.841152	0.446791	5.29524	0.874558	1.59484	0.472288	0.533545	1.38741	5.38865	1.88999	4.92694	0.402022	0.0788934
chr12	4229573	4230333	1.38889	0.672691	0.116144	0.479532	0.203252	0.37037	1.45985	1.81239	3.7102	0	0.0919118	0	0.757576	0	0.462963	0.488355	0.555556	6.89655	2.73148	1.10092	chr12	4227707	4229707	SLC6A1	0.0694145	0	0.015418	0.0689611	0.426871	0.0729856	0	0.100909	0	0.0125521	0.476856	0.109791	0	0	0	0.0871969	0.0141823	0.187942	0.432308	0.116536	0.118131	0.619877
chr12	4376351	4377017	0.0890038	0.0250063	0.0280112	0.0468604	0.473156	0	0.0610594	1.22378	0	1.69592	0.0922439	1.35552	0.0507986	1.12798	0.0587091	1.55398	0.0777317	0.114085	0.0744539	2.21572	chr12	4374619	4376619	ATG7	6.90755	11.4901	5.5817	6.34614	11.2827	5.72804	7.06022	7.7828	6.55723	5.98642	11.1381	6.78168	6.75563	6.5265	8.25085	6.12291	5.1927	6.08398	5.51591	9.6662	0.0592495	0.804035
chr12	4653959	4655580	2.06258	1.47927	3.35744	2.87447	1.26873	2.38384	0.385519	2.40628	8.41861	1.24205	2.27599	3.84413	2.42534	1.9983	1.28223	0.751496	1.74189	4.8111	4.20735	12.6908	chr12	4652781	4654781	SYN2	0.0640884	0.0772673	0.0535718	0.11311	17.9082	0.101874	0.461826	0.057947	0.0527922	0.443974	16.3283	0.311694	0.198372	0.0609367	0.00828768	0.596638	0.143442	0.0885723	1.07478	0.20987	-0.163084	0.492088
chr12	4653959	4655580	2.06258	1.47927	3.35744	2.87447	1.26873	2.38384	0.385519	2.40628	8.41861	1.24205	2.27599	3.84413	2.42534	1.9983	1.28223	0.751496	1.74189	4.8111	4.20735	12.6908	chr12	4652781	4654781	SYN2,TIMP4	8.10399	0.588171	2.27472	28.0206	4.59115	11.8846	1.71495	3.31502	1.54326	3.53543	7.12169	8.31204	6.05046	34.797	1.0738	3.81456	13.2159	10.6093	36.0678	62.3289	0.631877	0.00280135
chr12	4653959	4655580	2.06258	1.47927	3.35744	2.87447	1.26873	2.38384	0.385519	2.40628	8.41861	1.24205	2.27599	3.84413	2.42534	1.9983	1.28223	0.751496	1.74189	4.8111	4.20735	12.6908	chr12	4652781	4654781	SYN2	0.166757	0.774049	0.381027	0.39654	1.2167	0.20092	0.945801	0.301161	0.415479	2.17574	1.55903	1.49939	1.89974	0.154954	0.00880621	0.423709	0.151068	0.614863	0.740719	0.556316	-0.115783	0.626899
chr12	4914928	4916140	0	0.0845309	0	0	0	0	0	0	0.627843	0	0	1.28205	0	0	0	0	4.54545	0	0	0	chr12	4913365	4915365	TSEN2	6.9309	4.83478	4.78157	6.43283	5.0588	6.68556	8.13288	5.07362	7.24868	4.01122	5.58547	4.46711	4.34226	5.77198	6.40827	3.13563	5.03313	6.37924	3.71706	10.32	-0.115681	0.627205
chr12	4914928	4916140	0	0.0845309	0	0	0	0	0	0	0.627843	0	0	1.28205	0	0	0	0	4.54545	0	0	0	chr12	4913365	4915365	MKRN2OS	3.90739	4.92311	3.45397	2.99609	2.69242	1.73654	2.82213	2.13815	3.18292	1.94936	1.21887	1.59684	3.11192	5.33758	3.09154	4.09313	1.69098	1.76642	2.42725	2.69266	-0.2939	0.208488
chr12	5051062	5052113	0	0	5.26316	0.0586855	0	0.358423	0	2.92453	6.25	0	0	0.909091	0	0	0	0	0	10.4396	0.0330688	4.33584	chr12	5049587	5051587	ENSGALG00000005012,ENSGALG00000005020	12.8441	12.4876	12.0259	10.7469	9.46589	9.04581	12.2534	8.78553	15.358	11.0864	9.14038	11.6291	9.03651	10.7177	20.2564	7.87681	14.6262	9.20585	7.46552	11.2514	0.000922075	0.996922
chr12	5111240	5111856	70.6013	67.029	84.0494	76.7328	54.121	74.4643	73.1219	75.9583	73.6445	66.6586	81.4691	73.4414	74.9332	80.1796	67.8519	75.4165	71.5922	78.557	69.1726	56.0712	chr12	5110169	5112169	ENSGALG00000027060	0	0	0	0	0	0	0	0.130212	0	0	0	0	0	0	0	0	0	0	0	0	0.116324	0.625278
chr12	5186276	5186936	33.0123	6.95254	14.5733	15.2977	10.8857	9.52778	4.56263	21.4354	4.00917	3.53456	12.5223	8.82386	12.1188	4.41141	21.1086	12.1246	20.8748	11.5482	12.9756	3.46377	chr12	5184795	5186795	ENSGALG00000005026	1.15674	1.48114	0.192263	0.474959	0.604875	0.206919	0.303656	0.261325	0.658552	0.161283	0.71379	0.231929	0.131575	0.139372	3.37564	0.154244	0.221429	0.38441	0.514384	0.85767	0.312669	0.179529
chr12	5186276	5186936	33.0123	6.95254	14.5733	15.2977	10.8857	9.52778	4.56263	21.4354	4.00917	3.53456	12.5223	8.82386	12.1188	4.41141	21.1086	12.1246	20.8748	11.5482	12.9756	3.46377	chr12	5184795	5186795	ACAD9,IQSEC1	126.101	318.279	31.4673	71.0331	80.3907	83.682	61.1678	42.4649	43.1106	52.3731	75.0769	71.9962	104.471	391.968	86.9907	65.4519	33.753	48.7936	65.3155	55.7744	-0.198582	0.401296
chr12	6121556	6130592	21.9819	11.3104	19.9408	22.5393	24.4798	5.85464	18.4734	36.3097	17.2041	19.5668	25.4936	27.7145	18.7004	29.4355	22.7625	42.5476	25.1774	29.523	30.2258	26.0235	chr12	6123098	6125098	BARX1	0	0	0	0	0	198.821	0	0.527924	0.860763	0	0	0	0	0	0	0	0.664492	0	1.68309	0	-0.517498	0.0194439
chr12	7229639	7235315	0.0556772	0.140576	0.18544	0.197043	0.155854	0.0526355	0.0439328	0.207156	0.237809	0.0661376	0.125297	0.0746265	0.100661	0.197837	0.362227	0.0410355	0.61267	0.485246	0.0242295	0.443548	chr12	7229021	7231021	SELK	73.5687	117.175	39.2303	64.0666	48.8884	40.7479	59.7112	56.9394	49.7253	56.9901	52.0491	60.4995	32.5153	115.122	93.3925	51.0942	51.1914	33.9803	39.8658	24.2662	-0.106117	0.656123
chr12	8849522	8851816	6.17647	17.1161	20.9906	9.44444	0	17.6954	2.68004	1.61118	19.098	12.1212	0.336134	6.39535	0.0614251	34.4828	13.6364	0	2.09644	3.23383	17.8571	9.16667	chr12	8849101	8851101	FLNB	15.1684	23.7309	29.9341	27.2287	12.458	49.6738	102.87	67.9495	49.0997	131.37	13.7371	53.2996	23.6823	17.5874	39.6278	60.3754	51.1861	48.8992	29.6794	37.6882	-0.147113	0.535962
chr12	8919274	8922083	33.697	23.5216	38.3165	27.2783	43.9775	34.6479	30.2832	33.9733	28.1291	27.8686	41.8082	41.3526	27.3652	36.5972	39.1057	41.6645	35.121	37.671	39.6986	41.809	chr12	8918982	8920982	DNASE1L3	29.7028	15.4348	14.3526	59.7623	0.890742	1.47605	2.85155	4.89195	76.2393	4.96317	0.42437	6.47293	2.43712	10.2997	0.588785	0.836339	6.80386	8.65891	5.42534	0.274766	-0.492327	0.027441
chr12	8975832	8977732	2.08333	3.73932	1.5625	3.48233	0	0	0.545773	0.740741	8.51852	2.72727	0	4.01606	1.51515	7.27273	1.21951	0.691244	1.51515	2.73973	0.274725	2.89988	chr12	8974729	8976729	NCKIPSD	2.49645	3.35482	4.6711	3.08998	41.3165	2.1716	7.55405	4.33979	4.5048	9.48475	45.6633	4.75615	3.04142	3.04604	2.34262	2.8875	3.28272	5.8359	8.64403	3.42951	-0.346968	0.133928
chr12	9045496	9046561	7.39804	6.44172	2.71981	5.51465	13.1269	0	4.9575	7.44681	3.89294	11.3235	13.615	5.77711	9.70191	9.49938	8.24905	3.69361	6.19403	7.89293	10.9843	6.28551	chr12	9044000	9046000	UQCRC1	94.6383	129.387	46.4265	74.5692	69.5384	55.6245	56.8221	48.6738	31.2578	32.1858	70.3086	38.5616	108.485	369.888	41.4558	72.8324	23.8825	34.7458	56.5072	20.2722	0.194125	0.412159
chr12	9063530	9067692	36.8302	33.2745	44.1019	40.0311	43.8807	39.3974	36.5107	32.308	42.544	34.2749	40.4115	39.523	36.8878	41.2847	39.8984	31.0716	44.1665	38.3552	38.6647	40.0495	chr12	9061535	9063535	COL7A1	0.0989741	0.180181	0.284674	0.287942	1.52594	0.98031	3.84698	18.843	2.0042	6.51179	1.15975	1.25583	0.161333	0.109548	0.202302	0.955971	1.59158	16.3304	2.53583	3.67848	-0.357294	0.121973
chr12	9063530	9067692	36.8302	33.2745	44.1019	40.0311	43.8807	39.3974	36.5107	32.308	42.544	34.2749	40.4115	39.523	36.8878	41.2847	39.8984	31.0716	44.1665	38.3552	38.6647	40.0495	chr12	9061535	9063535	ENSGALG00000028620	0	0	0.116542	0	0.186944	0.147502	0.571903	2.14111	0.189543	1.21635	0.102341	0.362881	0	0	0.197684	0.362982	0.371696	2.30718	0.481805	0.564573	-0.36615	0.112343
chr12	9148365	9149383	0	4.6398	0.778654	2.02822	0.131062	0	0.641032	0	3.81173	0.11306	0.127755	2.80055	3.04211	0.043592	0.0621311	1.13483	0.456349	8.78913	0	5.17241	chr12	9147092	9149092	RPN1	61.5487	278.376	50.878	95.4093	64.2546	106.015	155.91	81.364	90.6921	104.559	60.9595	89.2295	71.2813	89.3196	189.957	223.456	66.5781	77.1784	52.7551	49.4563	0.0795398	0.73888
chr12	9684893	9685350	0	0	0	0.0880282	0	0	0	0	0	0	0	0	0	0	0	0	0	0	0	0	chr12	9683434	9685434	PODXL2	1.27338	0.334306	0.294913	3.78108	59.7506	1.50275	21.6815	2.40486	1.47469	4.65579	54.8499	5.728	0.176699	49.0181	3.52814	1.07096	0.536678	4.21348	20.5914	1.78564	-0.0989523	0.678102
chr12	9877415	9880074	15.5172	5.22959	5.4321	5.86397	9.30967	6.98864	9.313	10.3717	11.1468	9.56429	12.9939	16.8143	19.5516	14.2954	8.43706	14.8992	9.48104	19.0939	7.86436	3.88889	chr12	9875933	9877933	PLXNA1	11.9835	10.8221	4.67154	14.9525	19.5405	13.83	18.1532	12.7733	10.0769	27.0781	25.7034	21.33	3.62762	17.5941	6.54262	6.31004	17.9871	16.5083	22.0702	10.3179	0.0299731	0.900175
chr12	9877415	9880074	15.5172	5.22959	5.4321	5.86397	9.30967	6.98864	9.313	10.3717	11.1468	9.56429	12.9939	16.8143	19.5516	14.2954	8.43706	14.8992	9.48104	19.0939	7.86436	3.88889	chr12	9875933	9877933	ENSGALG00000026199	0.468776	0.763995	0.264382	0.812242	0.177427	1.02644	0.654714	0.26596	0.402611	1.07717	0.455589	1.38505	0.630882	0.666946	0.794674	0.112184	0.29735	0.826149	1.51734	0.868604	-0.0650967	0.785111
chr12	10366446	10367263	0	0	0	0	0.125	0	0	0	0.25	0.105263	0.113379	0	0.0512821	0	0	0.695088	0	0	0.0293427	0	chr12	10364785	10366785	TXNRD3	20.2815	23.6947	8.50368	14.188	28.6861	12.9466	33.6715	27.2014	13.0371	12.6033	23.9109	15.8306	17.205	33.4289	15.9144	8.20566	24.4332	12.4038	15.0835	11.7319	-0.318648	0.170909
chr12	10449317	10450027	0	0.409836	0	0	0.531915	0	0.185185	0	0.129199	0	0	0	0	0	0	0.392157	1.38889	0.641026	0	0	chr12	10447679	10449679	CHST13	0.587785	11.081	7.12378	1.47994	0.836444	0.885281	2.98454	3.77234	5.44156	1.91932	0.702539	3.34494	5.01654	2.39386	0.353066	0.732544	2.17432	3.54708	3.72681	1.39824	0.0500368	0.834063
chr12	10449317	10450027	0	0.409836	0	0	0.531915	0	0.185185	0	0.129199	0	0	0	0	0	0	0.392157	1.38889	0.641026	0	0	chr12	10447679	10449679	CHST13	0.363868	5.14481	1.48913	0.450462	0.262787	0.161071	0.848428	0.723215	2.17849	0.744189	0.301564	1.17187	2.1872	0.587614	0.189302	0.0399961	0.585187	1.38813	0.82914	1.77406	0.060615	0.799606
chr12	10764069	10765099	0	0.206767	1.19048	0	0	0	0	0	0.780423	0.0476191	0	0	0	0.0357143	0	0	0	1.08696	0	0.0759013	chr12	10762795	10764795	ENSGALG00000006345	7.03436	9.18407	7.60465	11.0912	7.40031	12.2074	17.5771	16.9532	11.169	14.2584	6.39363	9.73895	8.26703	14.2642	8.38501	6.44295	8.30681	22.0254	8.62074	23.8608	0.194788	0.410534
chr12	10946031	10947289	2.22222	0.0280505	0	5	0	0	0	0	0	0	0	0	0	0	0	0	0	0	0	0	chr12	10944579	10946579	SLC6A6	12.9903	113.057	74.6042	27.6363	25.184	42.9975	14.0212	177.766	74.9904	23.0893	30.3104	76.2156	45.0464	139.668	62.488	59.5764	68.899	81.1863	188.498	172.986	-0.299925	0.198875
chr12	10946031	10947289	2.22222	0.0280505	0	5	0	0	0	0	0	0	0	0	0	0	0	0	0	0	0	0	chr12	10944579	10946579	SLC6A6	0.567089	2.45032	2.41883	0.733623	0.444578	0.95925	0.327022	2.99753	2.15348	0.764268	0.504172	2.7291	0.925987	4.13048	1.61377	1.68153	1.49638	2.84912	5.00944	9.74152	-0.223897	0.342648
chr12	11234148	11234549	0	0	0	0.106838	0.110865	0	0.608766	0	0	0.160256	0	0	0	0	0	0	0	0	0	0	chr12	11232234	11234234	C12H3ORF19	6.90825	7.57335	4.22187	5.20998	4.57603	4.51791	8.05659	4.92484	8.04128	4.21826	5.1993	4.574	3.45102	7.35502	7.35352	3.78528	4.72379	4.66757	3.05405	4.04591	0.328045	0.157941
chr12	11264748	11265328	6.03541	1.71958	4.19536	5.71789	4.94726	23.964	1.91163	5.04465	4.36004	2.09737	4.0529	5.20455	3.20728	2.9639	4.06557	1.58967	4.50801	5.38427	3.00477	9.87654	chr12	11263095	11265095	PLXNB1	4.65007	9.002	0.879758	1.58073	14.5669	8.94029	5.26724	2.91452	0.77314	4.94117	14.4101	3.47899	15.2396	5.86358	15.1989	10.5814	0.752785	2.24429	9.2847	6.3111	-0.00560356	0.981294
chr12	11264748	11265328	6.03541	1.71958	4.19536	5.71789	4.94726	23.964	1.91163	5.04465	4.36004	2.09737	4.0529	5.20455	3.20728	2.9639	4.06557	1.58967	4.50801	5.38427	3.00477	9.87654	chr12	11263095	11265095	ENSGALG00000006544	0.713452	1.24848	0.359695	0.589163	0.93976	0.769008	0.563315	0.381151	1.73711	0.544363	0.831585	0.404051	1.6603	1.28372	2.21855	0.906033	0.964379	0.634717	1.23135	1.38347	-0.0920223	0.699602
chr12	11264748	11265328	6.03541	1.71958	4.19536	5.71789	4.94726	23.964	1.91163	5.04465	4.36004	2.09737	4.0529	5.20455	3.20728	2.9639	4.06557	1.58967	4.50801	5.38427	3.00477	9.87654	chr12	11263095	11265095	SETD5,TADA3	9.6722	6.53843	9.8691	5.9778	5.47421	8.75091	7.6568	6.19771	9.35697	8.61388	5.22438	8.26536	5.78497	7.36613	10.5606	5.73177	7.72889	6.72816	8.39494	7.04141	0.174659	0.46143
chr12	11264748	11265328	6.03541	1.71958	4.19536	5.71789	4.94726	23.964	1.91163	5.04465	4.36004	2.09737	4.0529	5.20455	3.20728	2.9639	4.06557	1.58967	4.50801	5.38427	3.00477	9.87654	chr12	11263095	11265095	MTMR14,TADA3	27.3448	25.2475	8.9072	13.603	8.49242	6.06031	7.52382	6.75791	9.81207	4.76895	8.57983	9.66161	8.9573	8.12126	4.47655	6.983	5.1277	6.52793	6.36294	5.1863	-0.126036	0.596475
chr12	11264748	11265328	6.03541	1.71958	4.19536	5.71789	4.94726	23.964	1.91163	5.04465	4.36004	2.09737	4.0529	5.20455	3.20728	2.9639	4.06557	1.58967	4.50801	5.38427	3.00477	9.87654	chr12	11263095	11265095	CPNE9	0	0.170396	0.729697	0.354039	13.9654	0.119304	0.824895	0	0.272786	0.156959	10.0843	0.116032	0	0.484378	0.164361	0	0	0.262094	5.3696	0	-0.087239	0.714572
chr12	11264748	11265328	6.03541	1.71958	4.19536	5.71789	4.94726	23.964	1.91163	5.04465	4.36004	2.09737	4.0529	5.20455	3.20728	2.9639	4.06557	1.58967	4.50801	5.38427	3.00477	9.87654	chr12	11263095	11265095	BRPF1	5.69623	3.4771	4.80394	4.59354	4.829	5.59415	4.99367	4.11811	5.9039	3.29764	4.92306	4.24269	3.66265	5.65798	3.94872	4.21353	5.14316	4.78306	4.43984	2.85001	0.23391	0.320915
chr12	11264748	11265328	6.03541	1.71958	4.19536	5.71789	4.94726	23.964	1.91163	5.04465	4.36004	2.09737	4.0529	5.20455	3.20728	2.9639	4.06557	1.58967	4.50801	5.38427	3.00477	9.87654	chr12	11263095	11265095	OGG1	1.22406	1.43663	8.55027	2.22657	3.31932	2.60082	4.91394	2.27028	4.01892	3.00558	1.64916	4.26394	5.06494	3.21381	3.01517	4.35648	3.35881	2.71168	2.36955	0.173144	-0.226163	0.337655
chr12	11264748	11265328	6.03541	1.71958	4.19536	5.71789	4.94726	23.964	1.91163	5.04465	4.36004	2.09737	4.0529	5.20455	3.20728	2.9639	4.06557	1.58967	4.50801	5.38427	3.00477	9.87654	chr12	11263095	11265095	CAMK1,TADA3	12.9794	12.6519	10.9403	19.8414	22.9872	13.4507	26.0262	8.46848	9.72162	10.8366	28.1306	11.7698	10.0324	17.0201	10.2063	12.2834	12.1018	13.8453	13.231	3.11811	-0.144961	0.54201
chr12	11264748	11265328	6.03541	1.71958	4.19536	5.71789	4.94726	23.964	1.91163	5.04465	4.36004	2.09737	4.0529	5.20455	3.20728	2.9639	4.06557	1.58967	4.50801	5.38427	3.00477	9.87654	chr12	11263095	11265095	ENSGALG00000006544	1.12866	1.31747	0.421852	0.636785	1.02374	1.71387	0.547446	0.665917	1.55303	0.75784	0.917469	1.16267	1.7196	5.72207	0.806977	2.02411	0.851831	1.34516	2.35545	1.5753	-0.00790666	0.973608
chr12	11264748	11265328	6.03541	1.71958	4.19536	5.71789	4.94726	23.964	1.91163	5.04465	4.36004	2.09737	4.0529	5.20455	3.20728	2.9639	4.06557	1.58967	4.50801	5.38427	3.00477	9.87654	chr12	11263095	11265095	LHFPL4	1.44785	0.751511	0.22883	0.84031	10.7099	0.658786	0.707714	1.23362	0.81587	0.293876	10.0112	0.14022	0.826625	1.28559	0	0.266148	0.582707	0.202349	9.37477	0.163987	-0.102246	0.667964
chr12	11614351	11615624	5.83333	18.1159	26.8141	5.70208	3.16667	2.38095	3.77778	4.97076	12.2475	3.09246	3.83838	11.1032	10	16.3542	3.33333	10.9744	12.6667	0	6.12303	26.4362	chr12	11612397	11614397	IMPDH2	163.016	51.8333	29.9438	95.9589	95.7546	26.3427	38.8477	30.5354	23.0399	20.5053	109.707	28.6338	16.3611	60.9899	30.8788	25.3962	22.3503	24.9106	22.3124	14.3537	-0.240178	0.307739
chr12	11684071	11685437	0.0318573	0.311236	0	0.185852	0.402047	0	0	0	1.06112	0.47724	0.840025	0.893651	0	0.0659497	0.130208	0	0	0	0.624047	0.801484	chr12	11682856	11684856	SLC25A20	10.2621	40.6918	6.60762	8.36385	3.35046	5.7335	12.1092	3.99497	5.66886	6.64286	3.21843	7.04433	12.3245	17.4838	7.17983	5.44518	5.06763	4.91242	3.70942	3.8866	-0.15586	0.511711
chr12	11717469	11718573	0.15015	0	0	0	0	0	0	0.0233427	0	0	0.191571	0	0	0	0.0440917	0.0416667	0	0	0	0	chr12	11715744	11717744	PRKAR2A	55.254	16.6913	8.69006	22.4895	11.2767	9.06576	21.4597	5.73989	14.2669	27.0993	8.7003	15.3784	7.98775	39.9559	19.3651	4.60991	6.4585	7.51429	12.6863	11.1427	0.300498	0.197977
chr12	11771906	11772762	0.0430551	0.845411	0.0523697	0.167011	0	0	0.0648063	0	0.173611	0.0223015	0.0638178	0.0560732	0.025	0	0.023872	0.0199306	0.0935016	0.026721	0.0363342	0.0245942	chr12	11770120	11772120	ENSGALG00000007035,RPP14	34.2298	28.5111	17.6266	23.3336	10.6492	19.0091	30.1078	21.5101	13.6836	7.05242	7.5456	11.7614	16.8313	13.6752	8.68558	11.6336	7.7963	12.1347	5.74533	5.72728	0.390446	0.0887512
chr12	11812072	11813864	5.83851	2.48737	15.5506	3.16779	7.20656	3.06747	7.99451	7.35422	8.00633	9.34888	5.69239	4.41203	5.10747	9.41248	5.93318	2.19793	9.22107	3.4058	4.61254	17.0161	chr12	11811340	11813340	KCTD6	5.66277	8.36082	3.29704	3.18558	5.19681	3.03245	3.45189	3.89613	5.07016	3.81754	5.84905	2.81678	3.97803	3.99951	3.97374	3.08197	4.10998	3.43654	4.08426	5.32838	0.00956612	0.968072
chr12	11835785	11836938	19.3157	5.75599	32.4569	16.4335	20.5312	5.20756	22.6212	27.7566	20.6735	21.7059	24.0404	13.7628	13.4938	9.68175	11.3039	29.7059	33.9023	6.45646	35.8125	11.8476	chr12	11835234	11837234	FAM107A	0.43725	81.4906	2.79259	0.0858878	14.9164	15.9885	1.73647	3.29518	0.089289	2.32047	22.7532	22.5185	80.8864	0.278537	4.86502	40.9072	26.0485	0.746271	6.00924	0.14506	-0.180734	0.44574
chr12	12707631	12709057	0	0.133737	0.238095	0.182487	0.0531632	0.196597	0.0481	0.0881834	1.3357	0.00881834	0.0793651	0.0891649	0	0.175128	0.203252	0.153525	0.0529661	0	0.559984	0.142889	chr12	12705860	12707860	PTPRG	6.30172	68.2275	4.24856	6.28601	17.1438	6.6338	9.26862	5.16827	12.3002	28.462	15.4248	11.1494	4.55793	11.0877	3.38053	3.8023	15.7455	5.41364	10.0112	7.60745	-0.0384371	0.872183
chr12	13393975	13395067	2.77778	6.25	0	0	5.21235	0	0	13.7931	8.69565	7.69231	0	0	0	5.88235	0	0	5.71429	8.33333	6.89655	0	chr12	13392658	13394658	SYNPR	0.364075	0	0.103406	3.74681	209.944	1.92523	2.1425	16.6561	0.178515	0.541699	234.31	4.10633	0.23277	0.743616	0.652014	0.774333	5.34716	3.36389	66.8755	6.87056	-0.025224	0.915933
chr12	15275555	15276719	0	9.96732	8.73016	0	6.66667	3.0303	6.25	12.5731	8.9313	15.2174	0	10.7143	15.1515	0	35.6061	17.8571	8.82353	20.7207	0	50.463	chr12	15274529	15276529	TMF1	18.2783	20.2951	7.0419	11.5824	11.0588	9.54169	13.6404	11.1488	12.4449	8.59583	10.5074	9.20027	8.95757	13.0001	25.6797	11.4957	9.78799	8.30145	6.77575	9.74391	0.180529	0.446265
chr12	15291902	15292556	0	0	0	0	0	0	0	0.406504	0.202355	0.130397	0	0	0	0	0	0	0	0	0	0	chr12	15290803	15292803	UBA3	42.2701	25.0419	14.2148	20.6541	22.423	16.4097	22.8193	14.3951	19.2223	14.5405	22.2674	13.2637	13.4655	27.8653	21.7571	8.47278	14.3527	14.3215	15.9444	13.1964	-0.161095	0.497452
chr12	18260703	18262479	6.52174	2.0653	0	1.19048	0.454545	2.00426	3.7051	0.90812	2.69058	5.35714	4.70588	6.17978	2.08333	7.61905	2.589	1.0989	1.62602	14.4013	0.78125	1.12782	chr12	18259432	18261432	LRRN1	2.52256	0.139212	0.160269	0.880078	12.4346	0.23278	1.4559	0.319441	0.591907	0.469241	8.20713	0.266949	2.71536	2.05547	0.560918	1.84097	0.177079	0.145147	14.27	0.554687	-0.204592	0.386899
chr12	18607170	18608392	0	0	0	0.238718	0.292398	0	0	0.438597	0.026434	0.160052	0	0	0	0	0	0	0	0	0.13587	1.25	chr12	18605558	18607558	EDEM1	10.769	58.9596	27.7253	13.3875	3.45015	12.7564	29.3777	22.5899	29.7773	19.2014	3.04896	20.8213	13.7586	10.7283	156.28	29.835	21.7174	17.7151	10.075	21.3625	-0.11928	0.616452
chr12	18847150	18849285	4.14081	1.44619	1.07906	2.38646	0.776397	1.02201	1.31103	3.42995	7.15143	0.4879	0	1.45055	4.75544	0.446102	0.434783	0.591787	0.403226	6.25	0.556643	0.664957	chr12	18845534	18847534	GRM7	0.104855	0.0248111	0.127648	0.560853	43.4355	1.05477	3.02968	0.371854	0.453872	2.30378	43.7886	0.602944	0.458238	0.0413057	0.769389	0.0597245	0.242132	0.255936	5.83104	0.205154	-0.278993	0.233578
chr12	18847150	18849285	4.14081	1.44619	1.07906	2.38646	0.776397	1.02201	1.31103	3.42995	7.15143	0.4879	0	1.45055	4.75544	0.446102	0.434783	0.591787	0.403226	6.25	0.556643	0.664957	chr12	18845534	18847534	ENSGALG00000020755	0	0	0.206011	0	0	0.0979944	1.10181	0.0764355	0.135521	0	0.0389398	0.0338572	0.163349	0	0	0	0	0	0	0	0.0234889	0.921698
chr12	18847150	18849285	4.14081	1.44619	1.07906	2.38646	0.776397	1.02201	1.31103	3.42995	7.15143	0.4879	0	1.45055	4.75544	0.446102	0.434783	0.591787	0.403226	6.25	0.556643	0.664957	chr12	18845534	18847534	GRM7	0.0406144	0	1.24666	0.0934957	0.808203	0.0321171	0.119107	0.198476	0.0171084	0.200351	1.21317	0.0211656	0.305927	0	0.0431825	0	0.0248898	0.0446434	0.32724	0.0588254	-0.249576	0.288609
chr12	19214308	19215877	2.61598	3.89226	2.19474	5.68088	5.40141	3.35649	3.24639	10.1075	5.08311	1.47855	3.11823	2.3083	0.573395	2.84071	0.829475	1.64615	1.09481	3.93939	5.91092	3.45199	chr12	19212896	19214896	LMCD1	29.0265	4.2576	6.1332	24.221	10.1276	51.3166	23.5211	16.3769	4.85077	42.4094	16.4895	27.9794	49.3456	135.972	56.4177	32.5789	16.1062	17.2246	14.8376	12.3257	-0.310607	0.18257
chr12	19315584	19323563	29.6801	28.5623	38.419	34.1342	35.3432	30.2961	33.1642	38.601	33.7755	29.2811	36.2717	34.3234	31.8666	31.4549	30.735	30.1394	34.0767	33.7054	40.7766	36.9605	chr12	19316976	19318976	SRGAP3	2.33882	0.684427	15.0781	5.91519	21.191	2.17635	3.33012	3.41028	5.63276	3.47635	26.6994	4.67508	2.90033	1.98289	3.81493	0.398152	2.93385	10.3621	9.05685	7.93007	0.545097	0.0129355
chr12	19407786	19409085	31.9989	4.69235	22.1901	15.9441	13.805	28.8936	26.9715	25.8157	11.0551	15.4293	11.6831	23.856	26.465	19.3336	17.2236	17.9313	26.3265	29.7252	11.2527	21.3965	chr12	19406500	19408500	ENSGALG00000028009,THUMPD3	24.6075	46.1942	25.4769	21.6677	30.3032	19.9845	22.5236	17.4023	29.0035	23.8334	28.0327	25.7844	20.9744	20.6779	32.8864	26.0176	21.9618	20.1829	22.0862	21.7414	-0.671994	0.00117352
chr12	19431865	19432714	0.761799	0.398936	0	0.724638	0	0	0	0	1.30814	0.0117869	0	0.029577	0.0980392	0.0806244	0	0.0278707	0	0	0.00832917	0.0228938	chr12	19431948	19433948	GHR,SEC13	17.8852	21.0303	5.39466	13.843	4.51353	9.15081	16.8436	12.2986	9.1965	7.65714	5.66212	10.6082	5.28422	8.05529	12.9107	14.9037	5.68877	7.80587	5.45446	8.56461	0.345218	0.136032
chr12	19443968	19445778	0	0.194633	0	0	0.25974	0	0	0	1.28205	0	0.16835	0	0.373134	0	0	0	0	0	0	0	chr12	19442900	19444900	CAND2	203.608	8.21791	3.23051	68.9197	3.38946	17.425	3.96438	2.89641	3.35607	2.68838	4.94859	3.63416	2.22447	24.2263	7.53531	5.38928	2.33382	5.16018	11.4395	4.68527	-0.139464	0.557593
chr12	19461892	19467262	28.7171	16.5513	31.4728	28.5781	19.7687	28.4284	19.7636	25.1554	13.6092	23.9991	20.2675	29.7191	24.0564	24.3568	27.8192	20.2637	24.8181	29.1789	23.236	30.5229	chr12	19461061	19463061	MBD4	6.33511	2.4357	6.04859	6.26023	6.79924	2.85132	6.27543	2.93091	3.93856	2.94687	7.30629	3.47779	1.76204	3.90879	3.27646	2.51835	2.46411	3.1493	4.15391	3.65553	-0.00541469	0.981925
chr12	19461892	19467262	28.7171	16.5513	31.4728	28.5781	19.7687	28.4284	19.7636	25.1554	13.6092	23.9991	20.2675	29.7191	24.0564	24.3568	27.8192	20.2637	24.8181	29.1789	23.236	30.5229	chr12	19464741	19466741	IFT122	2.70973	8.18895	1.63823	4.29274	19.4602	4.90987	11.231	4.30115	4.24412	8.70163	21.9166	4.89484	5.63873	4.86292	10.5069	3.61753	3.28533	3.98908	6.96004	5.89981	-0.414078	0.0695163
chr12	19501367	19506956	81.23	68.3049	80.6819	77.0729	78.1528	70.5054	74.2023	74.6699	73.3878	75.0953	81.9606	74.9071	77.6946	78.5295	76.6534	74.6328	81.8902	79.0209	75.5197	78.046	chr12	19499386	19501386	RHO	0.134855	0.416521	0.234957	0.201277	6.4797	0.421267	8.06859	0.596149	0.530575	0.95027	4.73144	0.355564	0.494664	0.711262	0.114755	0.525314	0.261173	0.668267	806.503	0.507134	-0.0703524	0.768198
chr12	19501367	19506956	81.23	68.3049	80.6819	77.0729	78.1528	70.5054	74.2023	74.6699	73.3878	75.0953	81.9606	74.9071	77.6946	78.5295	76.6534	74.6328	81.8902	79.0209	75.5197	78.046	chr12	19506801	19508801	PLXND1	8.04003	12.5116	10.7705	15.2271	6.37285	11.4765	12.395	17.7714	13.694	21.224	8.80807	40.6167	4.68128	19.8639	9.56813	22.8905	6.02901	20.6468	13.586	18.7975	-0.262189	0.264112
chr12	19704698	19706165	0.0568022	0.0200597	0.530632	0.109802	0.0374455	0.0775622	0.0371683	0.0318693	0	0	0.0451904	0.0144035	0.038866	0.0407449	0.0408619	0.0108418	0.0706925	0.0113119	0.0343094	0.0163976	chr12	19703268	19705268	ZFYVE20	11.3538	12.4482	6.58758	7.5877	12.2051	8.66065	12.0885	12.8771	10.1144	7.43831	9.93933	7.9296	7.88774	12.5954	13.5969	6.14365	11.6477	9.80957	8.44567	12.9031	-0.337072	0.146141
chr13	377632	383764	53.4079	52.9419	76.8329	49.1413	56.3974	50.5676	54.5172	59.0611	66.8987	52.7609	55.0428	59.2069	59.4807	66.9001	60.0996	38.7063	62.5727	58.8435	66.3102	64.0103	chr13	376860	378860	DND1	0	0.364074	0	0.432609	0	0	0	0	0.126044	0	0	0	0	0.37504	0.421244	1.26693	0.574285	0.217366	0	0	-0.461975	0.0403004
chr13	377632	383764	53.4079	52.9419	76.8329	49.1413	56.3974	50.5676	54.5172	59.0611	66.8987	52.7609	55.0428	59.2069	59.4807	66.9001	60.0996	38.7063	62.5727	58.8435	66.3102	64.0103	chr13	382530	384530	IK	44.724	29.4301	29.2708	27.5826	38.6024	24.2206	26.3532	26.689	28.9315	17.232	38.4283	24.9534	16.8654	35.2571	26.9263	23.8039	20.1027	22.7185	25.091	17.6866	-0.00692314	0.97689
chr13	392175	393318	6.49003	8.06743	7.40113	4.60536	4.36491	7.25806	4.39351	6.8536	6.95028	12.3248	10.1146	13.2096	7.7617	20.5266	9.85687	9.79068	5.88261	13.6899	14.3568	23.1721	chr13	390964	392964	NDUFA2	88.0541	85.8613	35.7689	124.407	55.1175	51.5569	87.5756	22.3175	17.5782	57.4317	63.4761	38.1486	65.3905	182.5	66.723	55.8106	32.3881	51.2438	61.0986	22.3735	0.137818	0.562299
chr13	392175	393318	6.49003	8.06743	7.40113	4.60536	4.36491	7.25806	4.39351	6.8536	6.95028	12.3248	10.1146	13.2096	7.7617	20.5266	9.85687	9.79068	5.88261	13.6899	14.3568	23.1721	chr13	390964	392964	CD14	0.815758	0.243264	3.96793	2.23092	0.576948	2.64174	0.352282	1.98453	2.60529	1.08988	0.607218	6.36835	0	0.275695	0.653347	0	0.595575	2.64331	2.25623	2.34013	0.169501	0.474968
chr13	392175	393318	6.49003	8.06743	7.40113	4.60536	4.36491	7.25806	4.39351	6.8536	6.95028	12.3248	10.1146	13.2096	7.7617	20.5266	9.85687	9.79068	5.88261	13.6899	14.3568	23.1721	chr13	390964	392964	TMCO6	8.06178	3.3938	3.77548	6.57662	4.71783	5.82202	4.36142	2.73186	4.42088	1.80412	6.09899	3.44783	5.58795	5.17354	5.13391	2.77784	3.96648	4.84701	6.03355	3.29701	-0.189523	0.423542
chr13	392175	393318	6.49003	8.06743	7.40113	4.60536	4.36491	7.25806	4.39351	6.8536	6.95028	12.3248	10.1146	13.2096	7.7617	20.5266	9.85687	9.79068	5.88261	13.6899	14.3568	23.1721	chr13	390964	392964	TMEM173	1.21588	0.303884	0.865437	0.564029	0.241171	0.513542	0.470306	0.710275	0.939467	0.529947	0.249676	0.873817	0.210053	0.57391	0.150921	0.739887	0.570308	0.943296	0.370269	0.115711	-0.178652	0.451085
chr13	392175	393318	6.49003	8.06743	7.40113	4.60536	4.36491	7.25806	4.39351	6.8536	6.95028	12.3248	10.1146	13.2096	7.7617	20.5266	9.85687	9.79068	5.88261	13.6899	14.3568	23.1721	chr13	390964	392964	TMCO6	1.63771	2.42937	4.38298	1.8935	0.869942	1.97785	1.58728	2.35264	3.71477	1.48689	1.22057	2.25419	2.83548	2.41798	3.33108	2.15565	2.7931	1.88551	1.67259	1.40611	-0.157208	0.508023
chr13	392175	393318	6.49003	8.06743	7.40113	4.60536	4.36491	7.25806	4.39351	6.8536	6.95028	12.3248	10.1146	13.2096	7.7617	20.5266	9.85687	9.79068	5.88261	13.6899	14.3568	23.1721	chr13	390964	392964	TMCO6	2.62336	2.90866	5.72162	1.96411	1.20602	2.2422	1.73068	2.5382	4.24871	2.08023	1.47773	2.731	2.6375	2.83622	3.52089	3.54974	3.70117	1.79491	2.00652	2.10996	-0.112751	0.636011
chr13	392175	393318	6.49003	8.06743	7.40113	4.60536	4.36491	7.25806	4.39351	6.8536	6.95028	12.3248	10.1146	13.2096	7.7617	20.5266	9.85687	9.79068	5.88261	13.6899	14.3568	23.1721	chr13	390964	392964	TMCO6	3.87363	2.99831	4.62461	2.19003	1.48913	2.58816	1.46322	3.00918	4.02088	2.17599	1.56196	2.76941	2.39987	2.98366	2.88921	3.36981	3.90296	2.52129	2.15649	3.82884	0.135864	0.567905
chr13	392175	393318	6.49003	8.06743	7.40113	4.60536	4.36491	7.25806	4.39351	6.8536	6.95028	12.3248	10.1146	13.2096	7.7617	20.5266	9.85687	9.79068	5.88261	13.6899	14.3568	23.1721	chr13	390964	392964	TMCO6	33.6963	12.5188	10.0737	15.5746	9.96989	12.2557	14.0299	8.87473	11.3577	16.4124	8.62741	12.5964	9.02242	33.1287	7.23777	12.3812	8.01221	12.5321	7.57977	13.9051	0.268061	0.25317
chr13	989263	990877	3.92152	3.19737	0.716232	0.145648	0.161378	0	1.28372	0.625	7.95307	8.21905	5.45865	0.314388	2.39915	0.305559	0.00942152	0.00700329	0.716905	0.0278418	8.46152	2.99692	chr13	988099	990099	ANKHD1	19.134	10.2105	8.31371	8.9784	8.08743	8.2062	9.26592	7.03837	11.2126	8.57433	8.2022	8.37559	6.6181	10.6894	7.71492	5.87098	7.2745	8.0522	8.14055	9.36558	0.265356	0.258174
chr13	989263	990877	3.92152	3.19737	0.716232	0.145648	0.161378	0	1.28372	0.625	7.95307	8.21905	5.45865	0.314388	2.39915	0.305559	0.00942152	0.00700329	0.716905	0.0278418	8.46152	2.99692	chr13	988099	990099	SRA1	36.5647	73.0792	35.187	40.2868	41.6149	81.1373	40.8875	47.149	24.3397	31.6632	47.4621	41.9921	84.405	81.7442	76.6945	47.7514	37.1624	41.2401	41.9738	7.35258	-0.339327	0.143291
chr13	1095237	1100526	25.4454	26.003	44.1531	21.1429	17.8803	32.2395	24.9651	44.9322	27.0817	32.8579	28.8196	31.6077	33.268	30.6374	29.1674	23.1938	39.5062	30.7687	20.6373	38.3155	chr13	1094704	1096704	APBB3	0	0	0.134424	0.124217	20.1204	1.23177	0	0	0	0.108979	25.7879	0.139129	0	0	0.24226	0.715625	0.276297	0.123616	6.09874	0	-0.337284	0.145871
chr13	1406851	1409545	19.7668	3.0259	20.7166	5.63273	5.30809	5.30089	5.58388	13.6034	12.7109	11.1949	5.59728	12.8127	11.3473	8.01807	1.48337	3.96001	17.3775	7.87861	15.7152	7.71854	chr13	1406156	1408156	PCDH1	1.79747	45.4531	1.43901	2.36021	35.3916	6.42742	2.19471	19.8819	1.95981	2.58364	40.9511	10.0817	4.69829	7.72285	1.00062	9.38761	24.844	13.8028	13.8215	6.43129	-0.246405	0.29498
chr13	1765433	1766087	23.5615	4.60526	8.57143	13.2993	36.3661	2.66667	1.56926	40.3333	11.9593	4.03863	4.12249	6.3952	1.82999	4.97485	4.84234	3.52232	9.24686	3.57143	11.7462	4.63741	chr13	1765728	1767728	ENSGALG00000024379	3.38362	1.59811	0.76033	11.8221	0.120881	5.13132	7.46571	17.8476	3.16169	9.65548	0.135373	17.5901	1.78931	9.9683	2.11387	2.19472	1.7998	10.5435	4.77006	8.80783	0.170927	0.471207
chr13	1957298	1961674	72.2297	80.6231	81.4242	81.1833	62.1699	70.5114	78.0399	78.5892	87.3512	72.1021	79.7002	77.3191	74.8512	80.0508	69.4622	71.5555	77.2418	80.2393	73.6055	82.8722	chr13	1957776	1959776	LRRTM2	0.819366	0.518215	0.797722	0.768398	17.331	1.34644	0.476916	0.708978	0.988017	1.35833	23.9666	1.75139	0.442061	1.3645	0.571928	0.356842	0.688144	1.52844	7.58671	2.22966	-0.252271	0.283261
chr13	1957298	1961674	72.2297	80.6231	81.4242	81.1833	62.1699	70.5114	78.0399	78.5892	87.3512	72.1021	79.7002	77.3191	74.8512	80.0508	69.4622	71.5555	77.2418	80.2393	73.6055	82.8722	chr13	1957776	1959776	CTNNA1	19.0335	35.2576	21.9814	39.0242	9.68165	43.7327	46.4658	52.7137	32.0011	45.7985	9.86573	65.8291	35.1119	76.9504	36.417	48.3376	59.6913	50.1469	36.8793	56.7454	0.275603	0.239546
chr13	2134599	2135352	0.116822	0	0.198413	0.0374574	0.0364963	0	0.0667557	0	0	0.034965	0	0	0.0541126	0.0612194	0.192678	0	0.164244	0	0.0203169	0.0455483	chr13	2132784	2134784	HSPA9,SNORD63	118.54	83.049	31.888	52.1838	51.9368	25.4396	54.9763	34.4131	23.6763	32.3381	48.0861	40.9484	55.6665	93.8332	17.3568	36.4281	22.3101	24.9363	35.5194	38.7245	-0.0116111	0.961251
chr13	2666429	2679294	10.7486	13.4486	9.68777	9.2005	14.8388	19.215	5.41547	15.0395	9.24976	9.26852	9.8519	7.27929	7.48873	10.4457	8.71372	6.29864	10.6808	10.9015	13.3832	11.4914	chr13	2679193	2681193	RANBP17	0.0715286	7.46613	0.0358067	0.278866	6.89025	0.285222	0.543002	0.101761	0.250298	0.686797	6.68759	0.948817	1.49957	0.374471	7.33942	2.28307	2.12042	0.195998	4.22679	0.139356	0.134524	0.571765
chr13	2830685	2831919	7.85933	4.59447	16.2463	8.68232	5.09707	6.58068	6.68922	12.353	13.2679	9.76401	5.51618	4.08	5.42563	5.64516	6.47629	4.10053	9.3099	11.1702	15.3544	25.974	chr13	2830798	2832798	ENSGALG00000028038	0.0103768	0.0314269	0	0.0179181	8.83933	0.0646775	0.0155135	0.169192	0.0225804	0.0215451	6.03686	0.0282229	0.0769114	0	0.506553	0.116154	0	0.0380839	2.57325	0.0147764	-0.186034	0.432283
chr13	4052566	4054011	10.9477	0.608227	1.01357	4.78161	3.15601	4.5236	6.31147	1.0731	0.0597026	0.695397	2.93881	5.16807	3.15711	1.87978	5.86796	11.8505	2.36964	3.82273	1.13981	2.98237	chr13	4051586	4053586	PANK3	23.8145	61.8603	28.3338	21.2398	40.5158	21.1665	41.6842	30.002	48.8345	38.8144	39.6047	33.8705	49.4742	44.819	33.288	12.5212	32.0961	20.0954	21.0706	32.144	-0.520288	0.0186867
chr13	4078038	4079388	3.07969	8.79349	9.04552	6.06061	5.48879	4.40606	4.0407	12.8824	12.671	3.44557	4.87288	6.40627	9.05467	3.28571	1.69676	12.7748	8.75028	2.53204	3.0625	6.97115	chr13	4076138	4078138	ENSGALG00000001874,RARS	1.40109	0.776024	0.697755	1.80452	0.618991	1.22919	1.41544	0.770377	1.19809	1.7381	0.455038	3.12755	0.537446	8.67792	0.837421	0.679455	2.15441	1.9457	2.30356	3.17868	-0.30385	0.192774
chr13	4078038	4079388	3.07969	8.79349	9.04552	6.06061	5.48879	4.40606	4.0407	12.8824	12.671	3.44557	4.87288	6.40627	9.05467	3.28571	1.69676	12.7748	8.75028	2.53204	3.0625	6.97115	chr13	4076138	4078138	RARS	12.8369	25.1312	15.3037	21.2059	20.8882	24.0062	25.8266	23.1436	25.4126	17.2795	17.8296	23.1063	17.1119	27.6432	19.1092	29.1933	15.6798	20.7185	20.6077	20.9315	0.279699	0.232348
chr13	4122391	4123246	0	1.12782	0.0587544	0	0	0	0.0839161	0	10.2564	0	0.144928	5.26316	0.342466	0	0.0529942	0	0	0.0268601	0.03509	0.114286	chr13	4120990	4122990	ODZ2,WWC1	6.16491	9.87544	1.24602	4.62832	25.0318	7.79655	7.49354	5.7132	4.57846	4.83916	36.1115	6.27846	13.2436	13.1718	23.4888	8.2021	17.8965	5.48872	23.355	7.0796	-0.22838	0.332812
chr13	6072295	6073273	0	0	0	0	0	0.0199937	0.0793651	0.024809	0.283055	0	0	0	0	0	0	0	0	0	0.233645	0	chr13	6070887	6072887	NUDCD2	12.7169	10.7011	5.19926	9.66373	13.5148	6.87092	11.1188	10.968	6.63769	6.57128	12.4737	7.81747	4.77585	13.2211	5.5507	4.61664	4.30213	7.76498	6.76878	14.6599	-0.172544	0.466959
chr13	6072295	6073273	0	0	0	0	0	0.0199937	0.0793651	0.024809	0.283055	0	0	0	0	0	0	0	0	0	0.233645	0	chr13	6070887	6072887	CCNG1	42.1981	21.6934	4.49716	26.5219	16.7788	13.0145	14.9684	12.9038	9.48672	10.4056	14.664	8.11562	9.86458	29.0742	6.61383	23.0212	11.5509	12.2395	10.2388	20.0638	-0.243564	0.30076
chr13	7163053	7163871	0.0965838	0.0201776	0.034965	0.0554939	0.14355	0.0193723	0	0.0124008	0.0149365	0	0.144231	0.862069	0	0	0.153846	0	0.0854701	0.116959	0	0	chr13	7161613	7163613	SLU7	16.4193	15.7588	11.8307	9.68729	14.7051	15.7148	16.8135	10.415	16.512	14.8971	12.2712	12.345	12.371	16.1128	32.7873	19.0456	19.9998	12.4266	9.35582	12.8393	-0.0184026	0.938619
chr13	7192455	7193601	14.0388	1.88039	3.68184	1.30907	7.64441	6.0241	1.2618	8.73016	10.8009	6.07704	7.65914	10.2711	0.422038	11.3039	11.1582	2.29512	1.06199	2.1536	4.60766	9.63773	chr13	7190750	7192750	CCNJL	0.461315	0.267756	1.60775	0.486699	2.15324	0.831065	6.56091	0.558195	2.3865	3.22325	1.05695	0.415742	0.472538	0.397452	0.0591672	0.172864	0.646417	0.373689	0.599898	0.697079	-0.167243	0.480958
chr13	7192455	7193601	14.0388	1.88039	3.68184	1.30907	7.64441	6.0241	1.2618	8.73016	10.8009	6.07704	7.65914	10.2711	0.422038	11.3039	11.1582	2.29512	1.06199	2.1536	4.60766	9.63773	chr13	7190750	7192750	PWWP2A	3.42274	4.19402	4.02127	2.98628	6.40314	3.95556	5.92739	3.23295	5.6762	5.38817	5.41803	4.17673	2.62887	3.67399	8.26565	1.7893	2.97516	3.58374	4.31084	5.50168	0.411293	0.0716046
chr13	7192455	7193601	14.0388	1.88039	3.68184	1.30907	7.64441	6.0241	1.2618	8.73016	10.8009	6.07704	7.65914	10.2711	0.422038	11.3039	11.1582	2.29512	1.06199	2.1536	4.60766	9.63773	chr13	7190750	7192750	CCNJL,FABP6	18.8557	0.991575	11.3187	5.65111	4.67485	1.4003	4.56245	2.14061	2.28126	7.84816	1.25752	1.82164	0.728872	14.351	1.65066	1.33603	2.76981	2.10925	2.76949	2.61545	0.400986	0.0797414
chr13	7863650	7864192	0	1.76449	28.6458	4.16667	9.82143	1.38889	2.82738	0	9.85948	16.9643	6.84524	14.1667	10.4167	0	8.33333	5.55556	31.6667	16.6667	24.4792	6.25	chr13	7862572	7864572	AFAP1L1	1.33913	3.30048	0.862672	3.337	3.61007	2.60754	6.43298	2.79514	5.82327	6.4801	2.88093	6.0558	1.79799	23.4737	1.3242	2.01529	12.9411	1.22656	2.76973	0.761569	0.000848136	0.997169
chr13	8180058	8184840	3.94172	2.4726	12.4744	7.08072	3.41739	4.04765	2.43546	7.98569	8.39108	2.92442	3.31743	8.04732	5.40349	3.18842	3.01985	1.62206	7.92238	5.3109	1.80127	3.92701	chr13	8181882	8183882	SH3PXD2B	1.48728	22.5198	2.00646	6.74889	2.17259	7.96005	17.0517	8.58581	3.5024	16.7131	3.19044	15.7002	3.50378	8.77868	12.6162	8.07268	6.85065	15.2712	6.28685	5.48077	-0.296615	0.204119
chr13	8486182	8487371	0	11.6505	14.8148	19.058	2.89855	11.3095	3.6	21.4286	11.6667	24.3827	24.8299	40.625	19.3548	28.9062	3.57143	0	16.6667	19.4444	11.1111	36.5385	chr13	8485014	8487014	BNIP1,C13H5ORF41	10.5368	16.9783	12.2035	7.93448	8.20377	10.3344	12.2281	11.6387	19.974	8.93542	8.42941	8.71424	11.483	18.4005	37.0818	13.6593	28.2981	12.2092	9.11632	16.9896	-0.164749	0.487617
chr13	9123690	9140527	8.18293	9.59358	12.9233	21.4345	14.4031	8.85749	8.57858	23.6528	11.9608	13.6682	10.741	11.7397	11.1921	19.0416	18.0509	7.95016	7.0185	39.5925	30.6156	31.9027	chr13	9126573	9128573	MSX2	0.181433	0.0635285	0	1.24084	0	0.347244	0.0236422	0.687103	0.0914974	0.0272546	0.0892678	0.275593	0.0398642	0.425421	0.366033	0.500114	0.11548	1.50093	1.56751	10.5261	0.565084	0.00942494
chr13	9396597	9397713	0	0.0359023	0.0591017	0	0.149925	0	0	0	0.294985	0	0	0	0	0.173913	0.222469	0.122115	0.108108	0	0	0	chr13	9395194	9397194	BRD8	14.3356	11.5039	21.0659	11.5668	14.8104	13.2374	15.635	9.06675	17.9067	10.4045	13.4639	12.6591	7.73654	13.2429	13.1349	13.2604	13.01	13.7892	11.3581	11.7401	0.419743	0.0654106
chr13	9504655	9506861	49.899	19.7621	39.2108	38.7691	40.8667	26.6473	11.8786	34.9763	19.9684	32.5403	36.4516	54.8833	33.192	34.9691	15.4885	35.5054	35.2414	46.4496	23.044	56.812	chr13	9504209	9506209	DOK3,ENSGALG00000003030	9.85315	13.3777	12.6242	8.04227	18.0212	7.955	10.6702	7.22158	16.277	6.06462	18.7688	8.17123	9.08167	11.7685	11.9144	8.36542	9.73643	6.41709	10.1632	4.58642	-0.333995	0.150092
chr13	9522245	9535584	42.371	23.4649	24.9922	21.2217	41.5412	34.2408	28.0055	28.3663	19.3844	32.6439	35.8195	30.6492	26.1624	35.9524	39.8573	36.8026	30.6838	42.2504	49.1172	30.1223	chr13	9521272	9523272	ENSGALG00000029109	0.255753	1.7249	1.58997	1.25977	0	1.39764	1.1431	9.08619	1.19049	0.622262	0.0614247	1.59123	9.01343	0.369796	2.445	2.54916	2.59223	3.46442	0.48376	1.73723	-0.261991	0.264487
chr13	9522245	9535584	42.371	23.4649	24.9922	21.2217	41.5412	34.2408	28.0055	28.3663	19.3844	32.6439	35.8195	30.6492	26.1624	35.9524	39.8573	36.8026	30.6838	42.2504	49.1172	30.1223	chr13	9526622	9528622	MXD3	0.490625	4.24913	36.4781	1.17361	1.11944	1.57763	26.694	5.87515	6.96413	2.44432	0.918541	2.05757	4.89939	0.533139	4.50372	0.822319	3.52351	4.82787	0.265966	0.592527	-0.369627	0.108716
chr13	9522245	9535584	42.371	23.4649	24.9922	21.2217	41.5412	34.2408	28.0055	28.3663	19.3844	32.6439	35.8195	30.6492	26.1624	35.9524	39.8573	36.8026	30.6838	42.2504	49.1172	30.1223	chr13	9529751	9531751	RAB24	17.9899	4.80471	15.6124	14.0217	8.78289	4.62771	14.0904	8.09693	9.4978	5.12412	16.8766	5.07659	11.1917	12.3819	5.55413	6.37965	6.08627	5.75726	6.78514	3.55088	-0.104984	0.659582
chr13	9522245	9535584	42.371	23.4649	24.9922	21.2217	41.5412	34.2408	28.0055	28.3663	19.3844	32.6439	35.8195	30.6492	26.1624	35.9524	39.8573	36.8026	30.6838	42.2504	49.1172	30.1223	chr13	9527863	9529863	PRELID1	20.7685	172.573	60.7025	63.5388	73.4344	63.2337	167.416	104.228	73.0077	70.1712	89.4026	90.081	273.413	104.304	201.449	146.155	63.2482	63.3584	58.9485	45.2742	-0.216916	0.358294
chr13	9522245	9535584	42.371	23.4649	24.9922	21.2217	41.5412	34.2408	28.0055	28.3663	19.3844	32.6439	35.8195	30.6492	26.1624	35.9524	39.8573	36.8026	30.6838	42.2504	49.1172	30.1223	chr13	9534952	9536952	NSD1	18.6992	10.935	16.3789	7.08429	9.20171	9.56463	6.97028	6.46987	12.7658	11.4306	9.4712	12.1133	7.11985	11.0868	10.7137	9.50343	9.5787	8.93117	8.74248	12.7929	0.0590697	0.804619
chr13	9588494	9594050	19.9986	33.2873	32.0383	21.7085	19.9487	20.0656	21.9401	28.7718	31.1419	26.1609	24.0428	30.0608	22.6803	25.2571	19.8253	25.9706	30.4591	27.1377	33.2863	32.167	chr13	9593614	9595614	FGFR4	11.7281	35.3234	1.93728	9.4142	1.78138	19.186	6.35714	1.59551	2.06871	1.62445	2.06512	11.1064	24.2706	4.95715	25.1923	4.6057	5.25462	2.20394	6.36628	0.893586	-0.168707	0.477071
chr13	9613069	9615068	0.497536	1.39917	0.248605	0.242871	0.199099	0.436111	0.214652	0.550315	2.79576	0.181283	0.283828	0.232054	0.280073	0.240915	0.139328	0.174168	0.0784413	0.665351	0.168351	0.776957	chr13	9611885	9613885	HK3,UIMC1	8.73013	5.16143	13.2837	6.40912	10.2945	9.98715	7.91833	4.00302	9.56232	6.1498	11.5501	7.04189	6.31783	15.9343	12.3464	10.2855	7.6842	7.16647	8.59825	6.00999	-0.153997	0.516833
chr13	9613069	9615068	0.497536	1.39917	0.248605	0.242871	0.199099	0.436111	0.214652	0.550315	2.79576	0.181283	0.283828	0.232054	0.280073	0.240915	0.139328	0.174168	0.0784413	0.665351	0.168351	0.776957	chr13	9611885	9613885	UNC5A	0	0.10584	0	0.360874	26.0798	0.242181	0.879806	0.239924	0.0691998	0.244611	49.6385	0.144302	0.435557	7.72707	0.122302	0.181789	0.0777443	0	2.05002	0.0614541	-0.144717	0.542695
chr13	9668767	9673932	17.2365	16.1781	32.5802	22.3313	20.0343	23.0326	20.9007	30.6209	19.8558	17.0761	27.018	24.2724	25.8047	18.677	13.5207	14.925	28.1653	13.5739	30.3855	20.9197	chr13	9670036	9672036	SNCB	0	0	0.457096	0.39186	261.188	1.87194	8.4695	0.396071	0.117863	0.921867	264.815	0.131865	0	0.345868	0.354192	0	0.234846	0	157.948	0.883017	0.237625	0.313066
chr13	9668767	9673932	17.2365	16.1781	32.5802	22.3313	20.0343	23.0326	20.9007	30.6209	19.8558	17.0761	27.018	24.2724	25.8047	18.677	13.5207	14.925	28.1653	13.5739	30.3855	20.9197	chr13	9667177	9669177	EIF4E1B	0	0	0	0	0.640985	0	7.00278	0	0	0	0.548362	0	0	0	0	0	0	0	0.153545	0	-0.0216383	0.927851
chr13	9684482	9687823	60.9009	37.5516	74.611	54.8358	56.003	46.3086	40.3128	64.8431	36.5153	56.1951	53.8822	51.9284	53.4408	60.7947	65.1915	50.9363	76.0095	59.7577	55.9972	68.0343	chr13	9686558	9688558	CDHR2	0.0746842	0.045643	0.137155	0.0446471	1.63887	0.266109	0.392304	0.255407	0.14803	0.663209	1.54077	2.68147	7.62803	0	0.131375	0.302611	0.0468232	0.0643584	4.02693	0.0210008	-0.11326	0.634478
chr13	9684482	9687823	60.9009	37.5516	74.611	54.8358	56.003	46.3086	40.3128	64.8431	36.5153	56.1951	53.8822	51.9284	53.4408	60.7947	65.1915	50.9363	76.0095	59.7577	55.9972	68.0343	chr13	9682561	9684561	GPRIN1	0	0	0.297062	0.111456	22.2309	0	1.14248	0.114271	0.0626173	0.244132	33.055	0.319535	0	0.23707	0.486964	1.62103	0	0.109914	1.11742	0	-0.0556401	0.815771
chr13	9726995	9728342	0	0.105619	0	0	0	0.0264271	0.178571	0.0874126	0.00959509	0	0.46083	0	0.0952381	1.78571	0	0	0	0	0	0	chr13	9725814	9727814	CLTB	94.568	18.5821	29.1731	64.0836	89.1114	22.7818	62.6947	41.4618	19.6552	34.2808	74.8304	37.5501	22.7358	65.2587	20.9391	16.8835	28.598	38.8337	49.421	23.1297	0.286493	0.220722
chr13	9726995	9728342	0	0.105619	0	0	0	0.0264271	0.178571	0.0874126	0.00959509	0	0.46083	0	0.0952381	1.78571	0	0	0	0	0	0	chr13	9725814	9727814	ENSGALG00000021437	61.7128	18.3504	18.4656	45.1142	59.4621	20.3928	59.8827	30.6086	13.3768	33.2437	52.7859	19.2023	18.5883	36.3541	11.5052	14.5778	22.7735	29.0343	33.4135	23.9196	0.170363	0.472693
chr13	9736070	9743016	5.63857	3.05823	11.225	5.26003	10.241	7.41887	6.64759	7.3695	7.86357	6.89034	10.7625	7.71704	4.80946	10.9205	2.51227	2.36072	10.1409	9.13036	9.43933	8.11425	chr13	9734916	9736916	NOP16	9.34867	8.64034	6.23462	9.44138	8.39996	5.00266	11.986	5.98824	7.35883	6.67749	6.96933	5.43455	4.88853	4.59895	4.42038	4.81832	2.69826	3.94734	4.04488	2.27174	-0.198459	0.401593
chr13	9736070	9743016	5.63857	3.05823	11.225	5.26003	10.241	7.41887	6.64759	7.3695	7.86357	6.89034	10.7625	7.71704	4.80946	10.9205	2.51227	2.36072	10.1409	9.13036	9.43933	8.11425	chr13	9740521	9742521	KIAA1191	6.05528	6.3401	10.5366	4.68802	16.5767	4.25623	9.54441	4.76036	5.14498	4.48503	16.0602	5.26808	8.99646	7.79331	3.82954	5.28712	3.47722	4.92112	7.79505	7.80838	0.460468	0.0410427
chr13	9736070	9743016	5.63857	3.05823	11.225	5.26003	10.241	7.41887	6.64759	7.3695	7.86357	6.89034	10.7625	7.71704	4.80946	10.9205	2.51227	2.36072	10.1409	9.13036	9.43933	8.11425	chr13	9734141	9736141	ENSGALG00000003348	33.4494	104.694	30.973	106.706	37.7254	43.4109	86.1512	21.437	17.838	19.6027	45.7409	24.3141	103.153	90.0197	57.2627	24.6194	22.3828	37.2718	28.225	2.74408	-0.329993	0.155341
chr13	9736070	9743016	5.63857	3.05823	11.225	5.26003	10.241	7.41887	6.64759	7.3695	7.86357	6.89034	10.7625	7.71704	4.80946	10.9205	2.51227	2.36072	10.1409	9.13036	9.43933	8.11425	chr13	9734916	9736916	ARL10	0	124.583	106.701	23.9497	0.84291	44.4764	110.981	72.1302	140.216	385.202	292.388	127.65	150.115	0.138516	1296.09	1219.09	599.627	29.8278	26.3576	0.649371	-0.520411	0.0186538
chr13	9736070	9743016	5.63857	3.05823	11.225	5.26003	10.241	7.41887	6.64759	7.3695	7.86357	6.89034	10.7625	7.71704	4.80946	10.9205	2.51227	2.36072	10.1409	9.13036	9.43933	8.11425	chr13	9740521	9742521	SIMC1	8.67965	4.02788	1.71577	4.1346	1.4829	2.1421	2.22185	1.17369	2.0919	1.38138	0.865037	2.03172	3.24078	3.02918	1.40661	1.99309	1.43617	1.86422	2.04566	1.54369	-0.330003	0.155327
chr13	9784373	9785038	21.4286	31.5234	37.8571	23.2064	20.9629	13.3333	19.7727	20.765	23.9362	27.4123	35.3535	21.875	33.9286	40.625	17.8571	40.1709	29.0698	11.7647	21.3775	29.6458	chr13	9784966	9786966	HRH2	0.453273	0.106666	0.787128	0.577762	1.86446	0.815873	0.485472	0.816068	2.14908	0.79232	4.98633	0.84312	0.147762	0.575971	0.10144	0	2.19288	0.710131	0.661875	0.381199	0.115446	0.627908
chr13	10554566	10555485	0.261795	0	0	0.107759	0.0476191	0	0.462963	0	0.140831	0	0.0948291	0.071736	0.0385803	0	0	0	0	0.125858	0	0	chr13	10552867	10554867	CLINT1	39.5982	43.8737	16.9532	28.4735	12.4612	19.669	23.0071	16.6804	22.8156	17.7415	10.6429	23.7114	19.2114	37.5985	24.2636	22.1097	16.168	19.2999	15.2546	20.114	0.173667	0.464018
chr13	10731732	10733025	7.14286	0.148148	0	3.52941	0.181818	0	0	1.44928	0	0.110988	0	0	0.269542	1.44928	0	0.105485	0	0	1.51515	1.47059	chr13	10732433	10734433	ITK	0.840474	1.70895	7.59773	1.51985	0.0470346	1.43861	0.0976097	1.53293	18.5095	0.146622	0.037083	1.78608	0.995221	0.9938	0.333305	0.302853	1.97757	2.23246	0.539597	1.69843	-0.142604	0.548666
chr13	10774088	10774605	0	0	0	0	0.825397	0	0	0	0.343643	0	0	0	0	0	0.0551572	0	0.326667	0	0	0	chr13	10772315	10774315	MED7	13.4627	17.936	7.88754	12.4719	13.8892	8.70864	13.22	9.19802	15.4837	7.63129	11.1548	6.1618	5.67201	11.36	13.7362	5.16543	9.07525	8.94101	5.94853	8.16005	0.331273	0.153648
chr13	11359169	11360111	2.23991	0.2605	2.85321	1.11966	2.72582	0.668896	1.56574	1.44928	1.71885	2.73228	3.02023	0.961835	0.97984	0.791847	1.52186	0.601532	1.97823	1.16502	1.33587	0.958308	chr13	11357557	11359557	FAXDC2	0.596721	9.85717	1.13591	0.441709	0.932761	0.92731	0.397212	0.258279	1.15545	0.741643	0.910701	0.456843	0.955674	0.640021	0.729414	2.30345	0.681069	0.646629	0.453849	0.276129	-0.360693	0.118209
chr13	11359169	11360111	2.23991	0.2605	2.85321	1.11966	2.72582	0.668896	1.56574	1.44928	1.71885	2.73228	3.02023	0.961835	0.97984	0.791847	1.52186	0.601532	1.97823	1.16502	1.33587	0.958308	chr13	11357557	11359557	FAXDC2	1.47038	2.55754	0.955941	0.418368	0.197936	0.504503	0.278722	0.199591	0.719859	0.666754	0.146885	0.525901	0.495305	0.409478	0.273967	1.29793	0.426534	0.297973	0.34358	0.21397	-0.264339	0.260072
chr13	11359169	11360111	2.23991	0.2605	2.85321	1.11966	2.72582	0.668896	1.56574	1.44928	1.71885	2.73228	3.02023	0.961835	0.97984	0.791847	1.52186	0.601532	1.97823	1.16502	1.33587	0.958308	chr13	11357557	11359557	LARP1	54.3985	45.2055	37.2136	22.2797	20.3734	22.0736	14.5426	16.096	15.4862	21.9909	23.4508	28.4048	16.1234	29.5429	17.8105	86.8375	14.5039	17.3532	17.3569	19.8963	-0.194905	0.410247
chr13	11448225	11455270	11.2562	15.2563	13.0764	14.643	19.5421	49.7413	19.6976	20.7954	24.5017	40.6969	21.6145	24.1057	7.66894	23.371	5.98819	11.4905	17.836	32.2196	25.1782	25.0272	chr13	11451018	11453018	HAND1	0	0	0	0	0	0	0	0	0	0	0	0.349919	0	2.46658	0	0	0	0	0	0	0.0575234	0.809643
chr13	12222179	12225433	18.4798	6.74251	19.6719	9.32824	17.1285	5.54783	10.9314	20.2855	10.2541	9.1189	25.273	12.0712	12.264	12.3171	16.842	17.8893	18.8173	11.9855	18.4346	15.5493	chr13	12223282	12225282	ATOX1	57.2339	203.609	41.5368	86.7825	84.9814	117.001	172.487	95.1845	71.5699	146.333	59.0821	86.2696	93.9935	118.226	105.032	127.91	76.5913	74.2203	66.2538	28.7851	-0.571629	0.00846075
chr13	12502378	12506302	68.1367	53.6372	52.6885	53.7385	56.6198	54.5982	49.6057	55.4832	58.6093	55.0724	65.2984	51.392	44.8172	52.3572	47.9542	43.1196	61.8526	55.7232	48.3104	62.2745	chr13	12501422	12503422	ARSI	0	0.169567	0.475829	0.397514	0.61676	1.37969	2.65196	2.78444	0.0268557	3.53106	0.384316	0.755803	0.0681921	0.080724	0.08792	0.295877	0.396694	2.81937	2.01897	1.25812	-0.0623724	0.793914
chr13	12666483	12668620	18.1336	17.2051	32.3504	16.1211	18.5949	24.5836	19.1756	18.069	21.4177	25.5607	10.4943	19.5296	18.3112	22.393	12.42	12.5062	23.2177	21.8411	20.7561	16.4658	chr13	12665833	12667833	FLT4	1.79676	2.23281	1.9097	7.9027	5.55277	3.38075	3.66839	6.23597	7.65453	3.7103	2.36504	9.64606	3.34043	7.92434	1.30252	1.50636	8.70751	3.9305	5.71468	3.15057	0.203265	0.390053
chr13	12715751	12717518	1.48148	0.597015	0	0.838475	2.10438	0.666667	4.16667	0	1.4881	0.784548	2.64706	5.26316	12.5	0.666667	5.97015	0.940171	0	1.05263	2.23812	0.0453515	chr13	12714333	12716333	RNF130	21.8914	49.3335	30.7697	30.3363	36.3171	21.3046	25.1493	27.9264	61.3842	31.115	44.9607	26.7145	26.1568	8.86552	18.8825	25.6816	18.0202	29.9377	22.6793	23.2662	-0.0757841	0.750825
chr13	12758624	12759539	0	2.39139	0.501096	0.12506	4.61766	0	0.030303	5.05291	1.21476	0.108225	0.661376	3.63636	0.143678	0.10142	2.47228	0	0.47619	0	1.92113	0.351117	chr13	12756887	12758887	TBC1D9B	25.7083	26.8125	11.2365	17.2373	23.646	10.2562	12.9633	15.2631	17.1001	10.2772	21.2013	12.8785	9.82223	18.1291	11.613	9.3905	9.60911	13.3748	15.2651	15.9138	0.280287	0.231327
chr13	12896102	12904755	0	0.547081	0.0088396	1.15044	0.0112562	0.0268528	0.00392157	0.300149	0.706267	0.0445173	0.00860186	0.686928	0.670479	0.0273673	0.00280505	1.00756	2.06572	0.358944	0.0271705	0.47097	chr13	12894466	12896466	HNRNPH1	212.324	156.514	195.316	119.657	118.014	109.711	139.278	115.648	167.707	106.785	106.44	110.287	105.3	153.486	142.015	97.4334	165.667	95.4423	71.989	65.2303	0.0234836	0.921716
chr13	12896102	12904755	0	0.547081	0.0088396	1.15044	0.0112562	0.0268528	0.00392157	0.300149	0.706267	0.0445173	0.00860186	0.686928	0.670479	0.0273673	0.00280505	1.00756	2.06572	0.358944	0.0271705	0.47097	chr13	12894466	12896466	DAK	3.65	5.44898	22.1863	3.78877	1.37341	3.06126	19.9576	6.23948	10.8064	4.5088	1.70928	9.23776	3.35759	6.79047	4.45824	2.65093	5.1616	5.16552	3.10219	8.48558	-0.137902	0.562056
chr13	12896102	12904755	0	0.547081	0.0088396	1.15044	0.0112562	0.0268528	0.00392157	0.300149	0.706267	0.0445173	0.00860186	0.686928	0.670479	0.0273673	0.00280505	1.00756	2.06572	0.358944	0.0271705	0.47097	chr13	12894466	12896466	RUFY1	3.59109	6.94698	5.1936	4.93369	7.66097	4.89305	16.3162	4.71917	7.44189	3.40859	6.31093	5.12282	4.79519	5.03779	9.36051	3.58436	3.91459	5.98931	4.08694	6.7537	-0.273943	0.242503
chr13	12981801	12983165	1.89394	0.837676	6.34921	3.00758	3.125	1.51515	4.54545	0	1.42857	5.18466	7.36111	0	3.40909	9.98623	18.1818	5.45455	4.6875	16.3636	2.81399	15.4101	chr13	12980379	12982379	ADAMTS2	2.56653	0.912612	1.32844	10.9739	0.896155	3.95725	29.5188	5.38869	1.81327	46.247	0.734695	9.75011	0.613978	4.55634	1.28279	1.22545	3.0095	10.2952	4.86023	6.57777	-0.00359799	0.987989
chr13	12981801	12983165	1.89394	0.837676	6.34921	3.00758	3.125	1.51515	4.54545	0	1.42857	5.18466	7.36111	0	3.40909	9.98623	18.1818	5.45455	4.6875	16.3636	2.81399	15.4101	chr13	12980379	12982379	ADAMTS2	0.220718	0	0	0.159052	0	0.0592579	0.220239	0.102404	0	0.423538	0.044832	0.194752	1.07584	0.0912123	0	0.143231	0.272508	0.0902849	0.310803	0.179934	-0.150891	0.525423
chr13	13261161	13262260	1.88679	1.33478	0	0	0	0	0	0	0.333333	0	0.268817	0	0	0.367647	3.84615	0	0.238095	2.83019	0	7.01754	chr13	13259585	13261585	MAPK9	23.3076	14.0455	4.35919	8.32507	17.5312	7.96683	9.82664	6.27811	6.12086	7.48776	14.9845	5.63085	5.08118	10.518	11.7009	10.6657	4.31945	9.01704	6.5538	9.90425	0.23314	0.322556
chr13	13684418	13685632	1.25	0	6	0	0.3125	0.5	0	0	0	0.416667	0	0	0	0	0	0	0	0	0	0	chr13	13683126	13685126	FAM13B	15.4414	15.3759	8.96454	9.57709	26.7348	10.0591	9.76046	9.86182	15.8398	8.57655	24.0909	8.11991	9.35241	15.9415	22.0686	5.6988	8.45892	8.65956	17.0701	9.74612	-0.132503	0.57761
chr13	13684418	13685632	1.25	0	6	0	0.3125	0.5	0	0	0	0.416667	0	0	0	0	0	0	0	0	0	0	chr13	13683126	13685126	PKD2L2	18.235	1.32296	0.810837	11.5088	0.843189	0.557553	1.60327	0.48647	1.34533	1.36305	0.695335	0.751364	0.41206	59.733	1.56888	0.418454	0.38623	3.5609	6.2751	1.27406	-0.055585	0.81595
chr13	13799246	13801234	0	0.0118336	0	0.0494591	0	0	0.114679	0	0	0.0154464	0	0.0792573	0	0.0254972	0	0	0.13587	0	0.0381437	0.0430205	chr13	13797884	13799884	HNRNPA0	4.8236	4.81261	10.5296	7.47022	7.62207	4.60003	19.1666	4.43731	7.09959	12.9325	6.68267	11.0464	5.12324	7.7149	3.76062	4.3129	5.17389	7.5271	6.57781	2.65593	0.428189	0.0596318
chr13	14735766	14737028	0.266598	1.08322	0.574495	0.29713	0.366556	0.120192	0.725763	0.809524	6.7367	10.7172	0.232019	2.26471	5.0653	0.481426	2.61539	0.15467	0.217317	0.49449	0.14459	3.84615	chr13	14734402	14736402	H2AFY	26.8466	14.7596	10.0014	16.6094	32.5667	14.4772	12.2086	16.6181	13.4186	9.49963	37.5306	17.1819	9.43139	20.3895	10.672	14.8214	8.17362	15.6225	19.3073	18.5191	-0.368507	0.109875
chr13	14927322	14940871	23.1337	12.9255	19.6335	27.2616	15.2798	36.1117	22.0077	34.5661	25.233	35.4101	20.6948	37.8605	12.7808	25.0261	8.56029	20.443	16.0285	33.9048	35.4395	27.9998	chr13	14932287	14934287	PITX1	0	0	0.221499	2.60413	0	9.55378	0.15104	0.370647	0	0.0768762	0	1.08461	0	0	0	0.300928	0	2.00139	6.2578	2.26492	0.546437	0.0126712
chr13	15029071	15035634	0.473796	0.0103821	0.450772	0.109578	0.20407	0.695105	0.086795	0.264096	0.602844	0.14578	0.389686	0.0555266	0.287918	0.320767	0.17095	0.225832	0.142487	0.262092	0.641921	0.0610035	chr13	15027964	15029964	CAMLG,SEC24A	67.2481	83.5058	12.3149	30.2083	19.565	14.3622	31.7614	16.589	16.1933	20.4753	20.9725	16.9826	15.6786	19.5026	20.3162	30.8327	12.2814	17.3964	14.3064	20.1582	-0.250975	0.285826
chr13	15059119	15061247	0	0.707257	1.72414	10.6061	0	0	0	1.92308	1.18203	0	0	3.0303	0	0	0	0	7.69231	5.42169	1.28205	2.72727	chr13	15057993	15059993	SAR1B	303.131	80.6852	3.52917	89.5344	9.94576	8.0251	12.0248	10.0652	7.01278	10.4967	9.02346	10.7461	11.5488	32.3254	11.6389	7.18662	7.92736	8.76529	17.5352	8.42674	0.00795745	0.973439
chr13	15204332	15205567	0	0.0845309	0	0	0	0	0	0	0.172414	0	0	0	0	0	0	0	0	0	0	0	chr13	15202771	15204771	PPP2CA	27.0711	31.7875	24.2205	19.8342	56.4024	20.0561	28.7377	32.0425	38.4247	20.297	53.6899	23.9641	15.8289	32.4113	31.8385	16.9882	23.8606	24.2926	20.9419	28.181	0.229857	0.329611
chr13	15204332	15205567	0	0.0845309	0	0	0	0	0	0	0.172414	0	0	0	0	0	0	0	0	0	0	0	chr13	15202771	15204771	SKP1	81.8935	114.142	64.2407	62.6287	96.2675	42.278	80.8443	61.068	38.385	40.5577	103.042	45.2572	57.8846	64.588	41.9636	33.2058	33.3953	42.49	61.11	68.294	0.022309	0.925621
chr13	15204332	15205567	0	0.0845309	0	0	0	0	0	0	0.172414	0	0	0	0	0	0	0	0	0	0	0	chr13	15202771	15204771	PPP2CA	1.55645	3.41988	2.28827	1.20353	0.732002	1.83299	0.573034	1.2088	2.18806	1.47552	0.786053	1.75727	1.98365	1.93361	2.4895	1.56829	1.38246	1.2882	1.36641	2.09366	0.452301	0.0452523
chr13	15204332	15205567	0	0.0845309	0	0	0	0	0	0	0.172414	0	0	0	0	0	0	0	0	0	0	0	chr13	15202771	15204771	TCF1	0.136563	10.9338	22.068	0.511236	1.63576	0.693271	0.159158	0.775505	16.9914	0	1.31913	1.82643	0.687646	0	2.79273	0.290264	3.57865	1.22248	0.98473	1.63324	0.615078	0.0038973
chr13	15352028	15353294	0	0.516796	2.94118	0	0	0	0	0	0	0	4.54545	5.26316	0	0	0	0	5	1.38889	0	10.8696	chr13	15350315	15352315	VDAC1	132.915	41.9578	22.1265	53.5059	30.3658	8.29994	4.34545	19.7331	7.7486	3.0069	32.7816	15.2764	15.3661	57.3467	22.0973	22.9931	18.453	15.715	46.2358	18.3162	-0.171259	0.470333
chr13	15562459	15563788	0.0363108	0.720412	2.5004	2.02708	0.207039	1.20748	2.4348	3.41385	3.33757	1.87077	0.956944	0.299517	2.47607	0.51977	0.925926	0.233625	0.0254259	1.92506	2.49146	0.93503	chr13	15560923	15562923	FSTL4	0.113199	0.111103	0.599389	0.096914	6.27291	0.620394	1.50833	0.211367	1.63994	2.12308	3.94416	1.92449	2.87184	0.28011	0.393309	0.959947	0.117936	0.816438	6.87966	0.0300278	0.0864284	0.71712
chr13	15967298	15968660	4.21604	0.789417	2.55318	2.08782	5.20394	2.11747	2.54879	7.60789	1.33566	2.76762	6.34698	3.92598	2.05176	4.72955	0.490105	0.814145	5.56157	12.7494	3.5962	3.25886	chr13	15966825	15968825	ENSGALG00000006592	1.00897	0.962551	0.517448	0.915639	1.68815	0.658688	1.25238	0.296843	0.495109	0.286846	1.99931	0.457167	0.364666	0.973974	0.675417	0.248828	0.258536	0.550433	0.597954	0.630929	0.113003	0.63525
chr13	16224947	16225845	6.81491	0.180905	7.28367	3.56175	19.1953	4.43574	5.99937	2.36534	6.81818	4.68559	9.49262	9.84849	8.94337	10.6689	1.5245	3.633	4.14957	4.53459	4.72926	4.54545	chr13	16225073	16227073	RAD50	1.63453	11.0633	4.7665	2.80015	7.26896	5.01241	5.50252	6.58424	9.74302	3.43777	5.72682	6.13303	4.33727	4.57143	5.91604	3.16813	3.3401	6.36707	2.78508	6.73774	0.00271831	0.990925
chr13	16300528	16302014	0	0.307018	0	0	0	0	1.44231	0	0.13587	0.138889	0	0	0	0	0	0	0	0	0.416667	0	chr13	16299589	16301589	CCNI2	0.667299	2.00858	2.07879	1.16117	5.45778	1.13394	4.59244	2.58687	3.0573	2.80719	4.26372	1.46097	1.24665	1.23047	2.77907	0.600353	2.5112	1.87303	2.41037	2.5958	0.413603	0.0698689
chr13	16300528	16302014	0	0.307018	0	0	0	0	1.44231	0	0.13587	0.138889	0	0	0	0	0	0	0	0	0.416667	0	chr13	16299589	16301589	ENSGALG00000007096,ENSGALG00000028302	88.5569	72.6447	12.97	59.4735	38.9397	46.6747	37.7582	17.0305	22.0419	14.3545	37.2161	18.6998	53.102	82.0666	19.2701	9.00963	11.4126	19.1652	40.9012	8.57043	0.0777605	0.744532
chr13	16300528	16302014	0	0.307018	0	0	0	0	1.44231	0	0.13587	0.138889	0	0	0	0	0	0	0	0	0.416667	0	chr13	16299589	16301589	SOWAHA	0	0.45022	1.33439	0.239621	10.3574	2.21436	1.7035	0.780315	3.85711	0.119553	12.2548	3.20355	3.96868	0.234634	4.02818	18.3174	4.7387	0.688512	2.06146	0.121237	-0.153088	0.51934
chr13	16300528	16302014	0	0.307018	0	0	0	0	1.44231	0	0.13587	0.138889	0	0	0	0	0	0	0	0	0.416667	0	chr13	16299589	16301589	2018-09-08	5.51549	12.8285	6.98292	10.9281	66.4918	11.2663	37.3512	30.7044	15.4492	30.6877	56.5917	17.0166	9.14808	8.29119	15.6629	7.59517	32.2807	19.8276	20.9801	14.6727	0.195608	0.408528
chr13	16300528	16302014	0	0.307018	0	0	0	0	1.44231	0	0.13587	0.138889	0	0	0	0	0	0	0	0	0.416667	0	chr13	16299589	16301589	ENSGALG00000007080	0.145239	27.7697	0.166425	0.155758	0.880378	6.15379	0.982166	0.152185	0.116525	0.199147	0.602697	5.8705	16.3159	0.242329	4.55915	18.8852	1.69141	0.228968	1.62238	0.387763	0.000601222	0.997993
chr13	16715167	16718394	34.1939	28.1409	39.3038	38.995	37.9329	37.7871	39.0425	41.3668	38.0305	37.3583	38.5282	32.9494	25.7164	38.6309	36.6712	41.0241	36.7143	37.3178	30.5918	37.1569	chr13	16715390	16717390	FGF1	12.6577	4.90876	0	4.6961	11.2563	6.67959	0.15128	0.118372	1.7629	0.175311	12.2457	1.44583	0.62788	18.6598	0.359914	0.398734	1.54741	0.636522	5.50354	0.24031	0.00894879	0.970131
chr13	16743542	16745912	37.9547	10.3846	36.0688	22.9823	24.5897	29.6208	28.6475	19.1239	13.2549	25.968	20.5341	14.8298	33.7962	24.482	9.38678	31.911	22.77	11.3557	25.1494	12.9923	chr13	16742629	16744629	ARHGAP26	6.07218	6.14753	23.4905	9.34418	21.6142	6.97532	7.11607	8.89605	20.3554	7.28557	25.9862	19.8496	5.82267	14.988	9.48961	6.56164	31.7577	11.384	7.81209	10.6826	-0.120536	0.612719
chr13	16850999	16851589	83.1849	73.866	74.663	55.6808	60.2594	74.9636	73.9003	74.8859	67.874	66.9636	69.1427	73.8276	75.7527	78.775	79.2041	77.1772	75.5841	74.7756	79.6654	70.9677	chr13	16849862	16851862	NR3C1	35.3994	17.9521	12.7193	19.2121	7.74026	14.7096	12.0737	13.5094	14.3804	12.351	8.58568	16.3065	10.7904	17.1356	15.6004	24.4059	11.9245	17.4458	9.77567	27.3443	0.294255	0.207914
chr13	17025057	17026225	6.97674	0.696069	5.55556	0.18018	0	1.93798	0.117647	0.576923	2.29126	0.903846	2.17718	1.11111	3.27869	0	2.32558	2.10256	0	1.72414	1.26812	0.58309	chr13	17024056	17026056	KCTD16	0.0531487	0.0682884	0.0533496	0.111905	44.2784	0.12863	0.0450588	0.225836	0.0632581	0	58.0722	0.0727922	0	0.0910024	0	0.868208	0	0.0476493	7.01139	0.0226462	-0.0890688	0.708833
chr13	17217624	17224765	20.6515	8.79451	10.0152	9.45669	11.7358	13.2168	4.35436	13.8859	11.359	11.7827	9.40826	7.33349	7.87888	7.1153	18.7508	9.08748	6.64644	14.5966	9.9499	14.7989	chr13	17219662	17221662	GRXCR2	0	0	0	0	0	0	0	0.1989	0.61755	0	0	0.0781844	0	0	0	0	0	0	0.0884894	0	0.03423	0.88608
chr13	17278738	17280399	0.106849	0.015625	0.0548253	0.0375375	0.163447	0.0486886	0.103506	0.696492	0	0.283122	0.640919	0.231446	0.0548706	0.0363721	0.0779786	0.0303357	0.10035	0.124125	0.135632	0.26455	chr13	17277459	17279459	ENSGALG00000007516	9.83263	5.32616	4.42591	4.66549	3.52639	3.25511	4.11697	2.65542	5.4571	4.20453	3.95001	5.11731	2.6561	4.00001	2.91411	3.16487	2.75353	4.21717	3.61068	6.71871	-0.120027	0.61423
chr13	17703196	17714533	0.0940051	0.0633607	0.041702	0.0320565	0.112882	0.221921	0.0640008	0.161521	0.243218	0.0339734	0.0490681	0.0750117	0.176399	0.150025	0.435756	0.0277778	0.0617041	0.0824537	0.00863782	0.117132	chr13	17702809	17704809	EGR1	33.6894	8.28987	3.4135	69.7994	18.0937	18.5555	11.5341	11.792	21.2026	39.8821	29.1813	69.6793	10.1905	44.4631	1.83874	23.9951	46.4005	50.7767	22.6108	25.2622	-0.392498	0.0869412
chr14	44808	46395	0	0	0	0	0	0	0	0	0	0	0	2.12766	0	0	0	0	0	0	0	0	chr14	43801	45801	PDXDC1	11.88	36.6245	29.9185	13.0827	24.3139	19.135	19.742	19.8672	25.6258	15.4985	17.8039	21.4285	19.2311	13.7073	34.8975	25.6462	20.9253	16.1571	9.58664	15.6605	0.0289674	0.903509
chr14	320871	322248	0	2.25114	3.0303	7.79221	0.666667	0.769231	0	5.88235	1.42857	0	3.15315	2.85714	0.403226	0	4.34783	0	1.75439	0	13.2812	4.7619	chr14	319943	321943	ENSGALG00000002946	0.395085	0.371662	0.571173	0.353613	17.9313	0.647024	1.94894	0.934565	1.63452	1.26913	20.3523	0.497083	0.472102	1.71708	0.947954	0.27453	0.234062	1.02266	3.02324	1.12106	-0.0125002	0.958286
chr14	665070	666948	5.92321	0.952381	10.2649	9.63134	8.76957	4.46523	7.47794	7.11387	0.0149678	4.91071	8.14454	8.31541	5.66535	5.91342	5.05768	5.16745	9.62485	4.33817	10.776	7.27969	chr14	664459	666459	ERCC4	5.25606	2.24469	2.8285	2.93829	3.61829	2.42741	3.00942	3.10114	4.07195	1.7407	3.41607	2.1004	1.90122	1.60346	3.09199	1.11705	2.07231	2.51871	1.875	4.78722	-0.0418958	0.860785
chr14	688525	689865	0.0608194	0.0440213	0	0	0.0723723	0	0.03971	0	0	0	0	0.0171999	0	0	0	0	0	0.0979341	0.0183711	0.0359195	chr14	687108	689108	MKL2	26.5255	11.3972	7.04964	14.1331	53.7234	10.824	5.64402	15.5454	12.59	8.15654	56.5703	20.4672	6.69159	25.4759	15.7078	6.79633	10.0929	12.7823	8.42222	24.3266	0.254834	0.278233
chr14	956286	958885	1.64152	0.72499	0.140014	0.710183	0.621734	0.237426	0.118299	0.160494	0.634615	1.69919	3.17004	0.604615	0.00703532	2.65749	2.98627	0.0178571	0.093985	0.126045	0.486542	0.504834	chr14	956168	958168	EIF2AK1	9.44505	10.3928	6.45176	5.91918	6.71071	5.62683	6.66731	7.64302	11.1634	4.08975	5.61159	5.79932	5.45067	8.11045	8.10858	4.46195	5.8037	5.20113	4.54679	6.82487	0.202846	0.391051
chr14	989605	990309	2.94118	0.868257	0.396825	5.21854	0.631068	1.24357	0.632716	0.600091	1.17628	2.28438	0.631386	6.41026	0.616438	3.71212	0.769231	1.58279	3.76344	0.510204	0.994082	7.65306	chr14	988416	990416	ENSGALG00000003440	1.09921	0.221927	0.233256	0.304971	0.585842	0.0205181	0.238509	0.112381	0.215081	0.15248	0.500056	1.17659	2.46103	0.2165	0.741906	0.150507	0.343526	0.12415	0.173191	0.0493396	-0.00966861	0.96773
chr14	1016757	1018264	0.192313	0.0611081	0.171296	0	0.0726216	0.996118	0.582386	0.210824	0.227653	0.0621118	0.949827	0	0.584795	0	3.1108	0	0	1.63873	0.854701	0	chr14	1016772	1018772	OCM	0.0634699	0.86115	0.110332	0.0383857	0.0247993	0.0679596	0.0850261	0.0685112	0.211761	0.158442	0.0734227	0.103156	0.162357	0.413225	0.0276067	0.0668674	0.113989	0.0657209	0.40642	0.465526	-0.252299	0.283206
chr14	1107730	1109092	0	4.42806	2.28311	0	16.6667	1.78571	0.934579	12.782	3.27196	6.81818	0.982385	0.925926	0	0	7.01754	0	0	3.125	6.90691	0.78125	chr14	1106002	1108002	TECPR1	114.025	124.531	23.2934	95.9988	21.3352	31.6836	32.3848	27.2314	29.9553	14.5192	27.2277	37.9424	69.1854	53.7824	40.2103	75.551	27.0133	36.1202	39.6727	70.3698	-0.371877	0.106415
chr14	1107730	1109092	0	4.42806	2.28311	0	16.6667	1.78571	0.934579	12.782	3.27196	6.81818	0.982385	0.925926	0	0	7.01754	0	0	3.125	6.90691	0.78125	chr14	1106002	1108002	BAIAP2L1	0	0	0	0	0	0	7.03535	0.518077	0	1.64179	0	1.0929	0	2.8584	4.31671	13.2175	0	0	0	0	-0.172215	0.467819
chr14	1107730	1109092	0	4.42806	2.28311	0	16.6667	1.78571	0.934579	12.782	3.27196	6.81818	0.982385	0.925926	0	0	7.01754	0	0	3.125	6.90691	0.78125	chr14	1106002	1108002	TECPR1	11.923	5.6497	2.17806	6.00109	21.7746	5.06111	2.96867	3.42726	3.24249	3.89534	21.7701	5.11066	3.99242	12.6022	9.11587	9.05401	5.5949	3.75395	11.5216	5.6159	0.28395	0.225028
chr14	1107730	1109092	0	4.42806	2.28311	0	16.6667	1.78571	0.934579	12.782	3.27196	6.81818	0.982385	0.925926	0	0	7.01754	0	0	3.125	6.90691	0.78125	chr14	1106002	1108002	BAIAP2L1	5.44732	31.3203	1.80485	3.07795	0.734456	9.37814	6.88726	8.94697	1.07472	2.62629	0.698696	6.52543	8.86606	5.04393	74.6855	29.1317	45.2573	5.76639	7.84614	11.4366	0.00633824	0.978842
chr14	1180789	1181961	5.47055	5.9352	15.5468	5.93716	13.0455	5.23374	5.87603	7.63761	7.98569	9.59543	9.37562	14.6126	11.4848	8.4644	3.97541	3.08279	10.6649	14.6168	8.08369	8.59363	chr14	1179651	1181651	NPTX2	0.310267	0.475586	0.0242122	0.421556	71.7409	0.725542	8.71621	0.688219	0.597338	2.35814	136.419	0.792984	0.552607	2.07999	9.48948	1.84707	5.57271	0.707449	17.6617	2.25612	0.137113	0.56432
chr14	1315559	1316086	0	0	0	0	0	0	0	0	0.793651	0	0	0	0	0	0	0	0	0	0	0	chr14	1315015	1317015	TRRAP	7.28658	6.4558	5.86977	3.9322	5.96662	4.11146	5.87027	4.11266	5.73427	6.17168	5.36197	5.64446	3.38433	3.91907	5.78205	3.98331	3.18814	4.51179	5.02039	8.95621	0.0782221	0.743065
chr14	2118519	2120220	0.170364	0.425208	0.0859782	0	0.0411374	0.0273411	0.0325309	0.036881	0.0305966	0	0.0398724	0	0.05	0	0	0	3.125	0.0196773	2.46914	0	chr14	2117614	2119614	HEATR2	7.45254	4.50767	2.49055	4.92686	3.08588	2.90941	5.81927	2.9498	3.33194	2.55914	2.65694	2.6784	2.69315	4.52948	4.2455	2.09586	2.82072	3.36981	2.91073	3.16674	-0.139967	0.55616
chr14	2369777	2375962	1.22987	0.0114469	0.61741	0.595238	1.30172	0	0.210044	0.0782473	0.188422	0.144033	0.30523	0.457014	1.22794	0.274286	0.0834919	0.128511	0.284229	0.106009	0.632578	0.252525	chr14	2370452	2372452	ZFAND2A	28.7793	16.2412	8.86707	15.775	2.96523	8.08019	38.6326	12.3573	6.05874	6.68379	3.31225	7.56913	3.98029	8.75032	6.46385	1.77355	16.1543	5.7002	4.93569	3.68846	0.044831	0.851132
chr14	2546090	2547145	0.118017	0.300481	0.126263	0.109644	0.238095	0	0.0413223	0	2.09524	0.0192938	3.28784	0.0282965	0	2.3142	0	0	0	0	0.0533419	0.0543149	chr14	2545763	2547763	INTS1	14.3205	9.5435	8.87044	8.45249	7.62049	6.84945	8.24842	6.42103	9.65268	7.2909	8.7391	8.21972	5.06812	6.89291	6.47898	7.22998	4.95181	7.35893	7.28568	8.38514	0.156298	0.510511
chr14	2592446	2601505	30.6244	7.2447	27.7798	19.2262	27.6055	17.3506	16.7491	21.4522	18.6295	17.9735	23.9338	18.3505	15.9552	24.6407	19.0143	17.1306	19.1494	21.7358	19.6208	16.741	chr14	2598320	2600320	MAFK	40.1967	11.8013	32.4883	20.8105	9.80489	18.2095	10.9193	13.9735	12.8291	17.8054	11.7494	15.026	9.75658	28.2601	8.80244	5.33268	38.1122	15.4473	11.5366	6.95819	0.520937	0.0185138
chr14	3072133	3076791	0.360166	0.208302	0.468104	0.799288	0.616709	0	0.52001	0.632293	0.890607	0.173265	1.95904	0.486155	1.45802	1.78647	0.545585	0.552209	0.447347	0.299905	0.647085	0.364021	chr14	3073993	3075993	NUDT1	6.87886	62.697	7.90248	6.65176	7.49431	7.16447	18.428	6.41834	12.3921	6.56918	8.20762	13.368	33.9187	4.98695	14.7837	6.44101	6.43583	4.96946	4.27564	8.30749	-0.0477173	0.84166
chr14	3072133	3076791	0.360166	0.208302	0.468104	0.799288	0.616709	0	0.52001	0.632293	0.890607	0.173265	1.95904	0.486155	1.45802	1.78647	0.545585	0.552209	0.447347	0.299905	0.647085	0.364021	chr14	3071672	3073672	FTSJ2	12.1963	19.8235	2.68998	12.2121	8.06698	6.0814	7.47454	4.17512	4.52811	3.92435	7.87164	4.37671	11.9375	9.31351	9.22642	5.10443	3.3475	5.08713	4.1027	4.98831	0.143279	0.546757
chr14	3072133	3076791	0.360166	0.208302	0.468104	0.799288	0.616709	0	0.52001	0.632293	0.890607	0.173265	1.95904	0.486155	1.45802	1.78647	0.545585	0.552209	0.447347	0.299905	0.647085	0.364021	chr14	3073993	3075993	SNX8	10.9096	11.8	3.39714	16.2942	2.72047	3.48935	12.0621	23.6269	7.32724	4.9154	2.55975	9.8617	11.7994	3.4965	1.97412	1.34879	10.3401	11.2004	6.97598	25.3522	-0.178454	0.451597
chr14	3100700	3106119	7.72222	2.17039	6.46067	0.0339105	5.33197	0.793651	0	5.44874	1.6647	16.3043	0.0149333	12.766	0.0714286	15.3955	8.58405	1.8909	5.19633	16.1364	3.21502	10.7645	chr14	3101671	3103671	EIF3B	119.423	54.6073	37.6766	65.359	24.6864	52.2392	56.9568	31.9324	41.6113	42.2758	24.5588	33.1679	27.6564	123.391	30.4597	93.4835	25.2194	38.1258	28.6839	43.1201	0.15478	0.514677
chr14	3130405	3131800	2.57732	8.44267	18.0751	2.06566	2.72894	1.0989	4.84127	8.33333	6.79753	0.725361	1.57509	6.43194	3.52113	1.05467	11.6883	2.16862	10.4762	15.942	3.36913	11.6963	chr14	3129406	3131406	CHST12	4.15118	2.06133	2.53481	5.28542	3.45587	3.05693	7.71202	4.32803	3.65199	5.32952	3.48033	4.06723	3.66043	7.20481	4.99108	2.1151	3.88659	5.56196	5.49343	4.96367	-0.115111	0.628914
chr14	3335833	3336930	0.763263	1.08561	0.454545	1.42354	0.217865	0	0.146281	0.32967	0.435387	0.381944	0.473588	1.33818	0.315114	2.98922	0.275822	0.221341	0.729814	0.384615	1.35154	0.311922	chr14	3334186	3336186	BRAT1	4.04878	4.21226	3.63208	3.45673	4.2631	2.05436	2.15209	3.75956	4.10073	1.64076	4.34078	2.11585	2.84181	4.89413	4.44876	2.67362	5.0408	2.40329	3.32252	3.19277	0.35627	0.123123
chr14	3520206	3521829	0.0257202	2.97023	0.0453159	0.162338	0.13858	0	0.0584795	0	0	0	18.8945	0.0544662	0.0318878	0.0754148	0.0714286	0	0.0894215	0.132056	0.0375375	0	chr14	3518732	3520732	SDK1	2.33188	0.823215	12.7359	3.51665	3.79391	14.288	4.94091	5.43868	7.03534	6.82993	4.76033	13.6113	6.5899	12.2352	15.2636	2.28252	14.6358	5.92785	9.64893	8.23234	-0.208269	0.378235
chr14	3520206	3521829	0.0257202	2.97023	0.0453159	0.162338	0.13858	0	0.0584795	0	0	0	18.8945	0.0544662	0.0318878	0.0754148	0.0714286	0	0.0894215	0.132056	0.0375375	0	chr14	3518732	3520732	SDK1	0.089627	0	0.180962	0.0562381	0.0303924	0.118335	0.0154154	0.133189	0.126033	0	0.0744237	0.589558	0.123769	0.226899	0.136573	0.223775	0.214322	0.207808	0.204258	0.576572	-0.173708	0.463912
chr14	4000674	4001475	7.00722	0.721101	14.4185	1.25786	3.88427	2.53474	6.48132	6.69128	7.21386	15.3623	16.9167	3.84294	4.27394	3.35249	7.66523	1.95636	18.953	3.80013	7.54717	11.1111	chr14	3999015	4001015	AP5Z1	8.87483	13.6215	5.8242	8.10004	5.23815	5.25627	5.84067	5.84119	5.9253	3.63345	5.20148	4.89132	4.58412	4.23567	5.05124	5.74466	2.71311	3.90759	5.46879	2.81005	-0.461191	0.0406851
chr14	4043441	4044620	1.92964	4.05098	8.82906	4.13282	0.252525	3.06569	2.94344	5.69865	4.30069	3.47964	2.0229	7.33571	2.43479	6.76242	3.9604	3.61789	5.44608	5.62331	3.73349	6.94647	chr14	4042363	4044363	WIPI2	40.0847	18.4443	9.1122	22.5227	36.7541	15.3158	23.2517	18.2193	14.5441	10.0262	33.4784	12.0915	15.9348	27.4626	19.0401	19.9975	12.6143	12.503	15.9919	11.7429	-0.635996	0.00257606
chr14	4075850	4077838	39.9781	30.1565	22.2248	30.5908	21.3337	34.1141	27.9845	32.2891	16.6294	21.7236	19.2446	39.7212	28.2228	35.3037	25.4908	23.3028	21.5657	23.8477	22.4364	32.0311	chr14	4074169	4076169	SLC29A4	1.24563	0.40525	1.55542	0.887298	9.15298	1.27788	1.09519	0.753847	0.99733	5.497	11.2054	0.581689	0.223994	0.969535	1.7453	1.04112	2.0392	0.918267	2.94923	0.795524	-0.488199	0.0289691
chr14	4127463	4140051	33.3577	22.7094	44.2371	18.6362	13.4232	13.5464	20.2326	35.1251	28.3096	24.6296	17.1826	22.6797	26.1969	17.2063	28.53	31.7583	35.7336	33.3289	31.593	26.5143	chr14	4126309	4128309	FBXL18	5.09214	1313.26	5.73619	3.79738	5.26824	3577.02	5148.94	2888.88	1519.52	25915.3	7.32833	672.388	883.43	1578.46	5584.08	2.63744	2.55122	436.644	7807.49	398.343	-0.0583146	0.807071
chr14	4184138	4190277	32.2917	40.3053	43.9601	33.4015	31.8689	35.6497	32.2119	30.8821	40.2969	32.8803	35.5558	37.1728	39.2604	33.7497	42.3497	36.4199	42.9443	45.4148	36.1686	41.5516	chr14	4182406	4184406	FSCN1	0.918887	5.90102	12.7439	8.68299	86.805	2.92454	109.017	17.5186	31.442	46.837	95.34	18.1887	4.92147	6.59518	1.85786	6.66175	1.51125	6.45615	19.2808	5.46868	-0.444102	0.0498048
chr14	4360949	4362968	4.36816	7.79773	0.158821	1.67897	22.3151	10.242	3.95909	3.5488	0.728898	1.56308	20.2898	2.44953	7.3241	7.30892	15.5232	15.3313	0.664382	2.27613	10.4849	0.941164	chr14	4359010	4361010	ARPC1B	14.0607	20.7909	135.076	70.3849	4.75368	32.2299	47.1535	97.0449	199.819	39.6868	5.39473	86.4313	18.6723	37.7677	6.75211	10.6259	71.1718	94.1772	31.693	22.2965	-0.635567	0.00259882
chr14	4375358	4376513	0.121212	0	0.260417	0.0476191	0.031211	0	0.0478469	0	0	0.167571	0	0.0434783	0.0369823	0.166963	0.0420875	0	0	0	0.0208333	0.12122	chr14	4374156	4376156	BUD31	108.77	84.899	37.1187	71.3983	37.0514	37.864	55.3099	32.3648	34.8218	29.4769	30.9731	31.6244	47.875	77.7445	48.3384	47.7418	34.3914	29.1315	26.3605	24.1363	0.166842	0.482025
chr14	4540600	4541394	0.0419287	0.00929023	0.733199	1.19048	0.0977836	0	0.018018	0	0.0115634	0	0.0202922	0	0	0.18797	0.0203252	0	0.109329	0	0	0	chr14	4539189	4541189	ENSGALG00000028955	4.3335	4.12128	4.29246	5.56598	5.44168	1.47436	6.46031	2.7863	1.34754	2.36278	10.4309	1.5525	2.1334	2.85678	0.174105	0	2.64373	2.30491	2.47578	1.15605	0.279623	0.23248
chr14	4773100	4773722	0	0	0.714286	0.377934	3.28571	0	0	0	0.657895	0	3.48291	0	1.25	0	0	0	0	0	0.697803	0	chr14	4771228	4773228	MED9	84.1281	28.703	31.5666	55.3633	20.2843	36.8689	25.2643	29.8958	26.9082	20.8055	22.9694	17.0867	23.9162	34.9106	49.9909	46.3264	23.2977	22.6138	23.2207	16.6083	-0.253171	0.281489
chr14	4891993	4897821	73.5356	60.7595	82.9581	71.4713	63.8274	68.9036	74.5954	74.9636	72.0778	74.4157	67.7669	72.6484	68.8142	65.3426	72.755	65.8548	79.7931	70.0802	70.6168	79.4268	chr14	4890013	4892013	RAI1	5.95134	1.59762	4.5495	2.71922	4.45037	1.85249	1.30735	1.40772	3.05376	1.45629	4.29312	3.48591	0.913301	3.35055	1.00294	1.31483	2.5489	2.3248	2.86621	0.927604	0.0188232	0.937219
chr14	4964365	4965156	0.0586969	0.0295946	0.110988	0.0689655	0.0452693	0	0	0.408163	0	0.141133	0	0.149702	0.347222	0.0196232	0	0.052331	0	0	0.0439651	0	chr14	4963078	4965078	LRRC48	0.140533	0.445012	0	0.186341	0.306767	0.0913904	0.202817	0.273936	0.386552	0.0400667	0.242611	0.0934612	0.238089	0	2.76211	0	0.113192	0.184231	0.691572	0.16708	-0.147619	0.534545
chr14	4986355	4987453	0	0.33105	0	0.0911369	0	0	0.0865801	0	0	0	0	0	0	0.142045	0	0	0	0	0.0167084	0.081666	chr14	4984885	4986885	GID4	26.4956	3.15691	5.33219	11.0649	8.63546	5.39186	7.06465	10.0142	6.08859	4.71624	7.05855	3.67167	3.463	9.06029	4.69107	4.03873	8.04467	8.31044	5.53691	7.58166	-0.121082	0.611099
chr14	4995375	4995934	0.030012	0.561798	0	0.0680272	0.0987654	0.531915	0.104167	0	0	0.0627491	0.159933	0	0.110865	0.0893389	0	0.0796004	0	0.134148	0.0645324	0.0661376	chr14	4993545	4995545	DRG2	25.8975	11.9066	5.32816	13.2514	10.3757	6.6031	8.78233	7.28783	6.26229	5.7587	10.8672	6.84174	6.71484	9.1372	6.55547	6.05128	4.65875	5.74578	6.2677	7.79048	0.0746595	0.754413
chr14	5051965	5059032	51.1762	48.6319	57.7915	58.2267	42.3359	53.7543	41.3872	47.1327	51.6468	55.1151	56.9403	53.4803	47.0065	59.3679	48.8722	55.892	52.4077	51.63	52.574	52.3734	chr14	5058275	5060275	FLII	48.7048	7.23464	17.4355	27.6958	10.0441	17.0022	14.1783	13.0498	12.9115	12.0657	11.1557	17.1064	6.11447	21.47	8.186	8.82153	10.4341	17.4797	13.0547	10.1125	0.251244	0.285292
chr14	5086691	5087581	1.35135	2.18487	3.01205	2.81541	3.1203	1.66363	1.35698	2.98077	3.80592	3.16456	3.14328	2.29508	2.58824	2.5641	2.22222	1.34409	4.86111	0	18.2609	2.41935	chr14	5085205	5087205	SMCR8	72.0663	11.492	7.91454	25.4334	19.2963	7.17639	7.63933	8.8439	12.3438	4.06261	18.658	6.90252	9.32791	16.3535	6.16928	6.73043	9.40718	8.37454	8.19963	5.54001	-0.122858	0.605838
chr14	5086691	5087581	1.35135	2.18487	3.01205	2.81541	3.1203	1.66363	1.35698	2.98077	3.80592	3.16456	3.14328	2.29508	2.58824	2.5641	2.22222	1.34409	4.86111	0	18.2609	2.41935	chr14	5085205	5087205	SHMT1	15.3148	193.105	2.06221	6.46983	4.52038	2.33653	6.53859	1.54571	3.84793	3.87678	4.20498	3.5268	26.9617	5.83428	1.52779	6.27345	2.00321	2.46636	2.57655	2.324	-0.0887542	0.709819
chr14	5224664	5230528	38.6431	38.1898	46.4554	37.7845	36.6049	32.0561	37.2458	38.7956	43.1636	39.9987	40.3983	39.9937	36.4789	37.8035	42.7396	36.2919	41.9533	39.9733	38.7654	37.2043	chr14	5228049	5230049	CACNA1H	0.327244	0.715185	0.0646418	0.357957	0.967986	1.24084	5.20228	0.101046	0.59146	12.1853	2.14665	0.591326	0.271548	0.996194	0.349947	0.349195	0.282686	0.489737	1.52461	0.369638	-0.028035	0.906602
chr14	5749733	5750553	0	1.84028	4.5045	0.878403	4.0887	0	2.7027	3.24324	8.15217	3.32892	1.57658	5.40541	3.78378	1.35135	0	0.900901	3.15315	0	5.90136	2.60271	chr14	5748314	5750314	LMF1	8.49636	32.071	4.41724	8.8864	5.33452	3.41852	6.72438	3.5183	3.40962	6.52873	5.98372	15.6988	4.65479	6.86498	9.47616	17.7749	2.63079	5.53312	5.25295	2.34995	-0.185686	0.433161
chr14	5981871	5982895	0.031746	0.26112	4.33286	0.151738	0.777027	0.111111	0.0727513	0.125	0.938086	0.326178	0.498538	0.20259	0.333911	1.20416	0.2	0.089948	0.501149	0.0454545	0.149499	0.406863	chr14	5980461	5982461	RPUSD1	5.08033	3.27409	3.75963	3.79754	33.7821	3.60559	3.8477	3.17389	3.56048	3.91702	33.466	3.71086	3.08108	7.24179	3.36964	3.72536	3.32165	3.44363	13.926	2.59163	0.0274263	0.908621
chr14	6031991	6032852	17.5843	8.03261	33.9915	16.0704	18.8681	19.5524	12.6204	25.8429	10.5483	20.0713	17.0859	24.0278	14.8251	28.9436	14.9976	16.2073	30.2524	33.4088	14.2919	46.9697	chr14	6031230	6033230	HAGH	0.234363	3.64449	1.93038	0.314399	0.638028	0.757188	0.415703	0.709229	0.87145	0.590616	0.84214	0.731217	3.66098	0.678852	1.41763	0.334837	0.849378	0.365827	0.815054	0.662854	-0.255456	0.27702
chr14	6031991	6032852	17.5843	8.03261	33.9915	16.0704	18.8681	19.5524	12.6204	25.8429	10.5483	20.0713	17.0859	24.0278	14.8251	28.9436	14.9976	16.2073	30.2524	33.4088	14.2919	46.9697	chr14	6031230	6033230	HAGH	92.0781	119.234	41.9901	54.2514	126.336	37.0314	28.5827	29.401	19.2567	23.4446	95.7634	24.9815	231.956	61.586	40.0145	4.61359	27.3501	23.5179	39.077	17.9749	-0.331316	0.153592
chr14	6225172	6226290	7.78986	3.63573	4.4898	4.58106	5.43706	1.28205	5.75126	2.53165	6.97786	5.03419	4.83848	6.42857	1.46724	1.69631	1.75439	5.71659	2.85714	14.7059	4.47336	4.46511	chr14	6223635	6225635	SLC9A3R2	29.4309	55.8734	18.3172	27.0181	28.6402	16.214	22.6143	23.2516	13.6108	26.0086	21.4265	27.8298	28.3617	59.6375	12.5633	28.8124	123.51	28.6899	28.716	13.4251	-0.167466	0.480365
chr14	6407500	6409156	0.121062	0.0919041	0.0493827	0.0824176	0.207299	0	0.104593	0	0.0954768	0.0893354	0.0907441	0.0353265	0.0415606	0.0432757	0.0219298	0.0362994	0.215998	0.117261	0.0778051	0.37594	chr14	6406648	6408648	TRAF7	6.68257	7.79553	10.4611	9.55153	6.06555	9.19157	14.4325	11.2803	11.3636	11.1511	8.90237	12.0087	4.7463	10.8534	7.86247	6.34371	9.39599	11.4419	11.4149	9.67343	-0.0530066	0.824357
chr14	6474040	6476451	0.650552	4.30323	2.35566	0.909402	0.766523	0.2849	0.66545	10.7414	14.5602	4.63619	0.578354	6.97715	8.27963	0.667762	3.09868	1.72182	2.8787	3.51066	0.678631	15.5843	chr14	6473725	6475725	MLST8	41.443	22.0616	14.9061	26.1728	17.2173	16.6625	18.6129	10.6933	12.1657	10.818	17.8274	10.0162	13.8662	26.0462	25.2198	16.7396	9.26069	10.072	15.3469	5.02854	-0.550717	0.0118562
chr14	6474040	6476451	0.650552	4.30323	2.35566	0.909402	0.766523	0.2849	0.66545	10.7414	14.5602	4.63619	0.578354	6.97715	8.27963	0.667762	3.09868	1.72182	2.8787	3.51066	0.678631	15.5843	chr14	6473725	6475725	BRICD5	0	0.318085	1.12129	0.444121	0.546945	0.413698	0	0	0.101973	0.145388	0	0.220862	0.243828	0	0	0	0.493374	0	0.120572	0.279818	-0.0844451	0.723364
chr14	6601338	6602491	0.0422297	0.169328	0	0.112853	0.0180375	0	0.276199	0.0451095	0.0150512	0.230415	0.162338	0	0.0266525	0.03367	0	0	0.0576379	0	0	0.378788	chr14	6600196	6602196	LCMT1	5.39198	3.48147	2.93995	3.66296	13.4433	2.55106	10.3184	5.45924	3.78069	2.96139	12.7284	3.67758	3.94927	6.77543	2.69195	1.4924	2.25337	3.65394	3.44088	4.87982	0.269181	0.251118
chr14	6759619	6760873	0.0478927	0	0	0.0608243	0	0.145985	0	0.112613	0	0.0197628	0	0	0	0.0257998	0	0.0374953	0	0	0.0511922	0.140292	chr14	6758043	6760043	ENSGALG00000006043,RBBP6	26.1303	24.4695	15.3453	13.7752	12.7067	13.7784	8.75277	11.6444	22.1981	10.3873	10.5274	12.2477	12.5387	16.8192	12.8358	9.52792	17.1743	13.6053	8.87047	16.9306	-0.0172131	0.94258
chr14	6798463	6799073	51.3072	64.233	86.4235	63.844	62.3523	22.8916	42.1987	62.1891	65.4002	58.4211	55.1955	41.1765	49.9531	68.6274	60.8974	63.3459	60.2293	66.6667	56.0606	73.1548	chr14	6796706	6798706	TNRC6A	10.8652	20.2871	7.51843	8.1341	9.208	8.12915	10.3248	5.31643	9.02726	9.30465	9.48073	8.34056	5.90925	22.2926	8.87846	7.33757	5.62787	8.5391	8.62047	12.3817	0.187464	0.428689
chr14	6866309	6867207	4.22125	3.5801	17.0534	7.75943	9.15373	3.55635	4.12923	8.30601	6.75125	7.27089	7.7893	9.02554	5.48818	7.4518	6.0404	3.04484	11.8838	10.3457	6.02565	10.4888	chr14	6864954	6866954	PALB2	0.772657	1.82439	1.14422	1.03728	3.34323	1.06879	1.80655	1.69426	1.74046	0.916732	3.06771	1.44877	1.91426	1.03378	2.3462	1.35565	1.05816	1.4714	1.38829	2.29675	0.0226885	0.924359
chr14	6883551	6884341	0	0	0	0.0934343	0	0	0	0	0.0943396	0.0512821	0.15625	0	0	0	0	0.130208	0	0	0.0452489	0.219249	chr14	6882673	6884673	PLK1	0.282206	0.658287	19.215	0.504559	0.214465	0.733187	27.7824	3.55026	4.68686	3.64168	0.0342089	3.83545	0.540246	0.702495	0.133553	0.958987	0.694176	1.7959	0.320835	0.340932	-0.215285	0.362008
chr14	6897903	6899051	7.41004	0.519213	3.34821	3.01263	11.2876	6.92998	2.52036	3.40909	4.22878	4.33843	9.76043	3.47775	0.912242	13.5086	2.32396	0.597015	4.07475	3.0969	4.05089	1.01852	chr14	6897565	6899565	ENSGALG00000006114	10.645	0.828766	0.569626	2.72196	0.981224	1.20297	3.9119	0.531135	0.992395	1.40552	1.28045	0.940126	0.461777	1.71606	1.64061	0.251764	0.5546	1.51294	1.44794	2.38458	0.181347	0.444172
chr14	6897903	6899051	7.41004	0.519213	3.34821	3.01263	11.2876	6.92998	2.52036	3.40909	4.22878	4.33843	9.76043	3.47775	0.912242	13.5086	2.32396	0.597015	4.07475	3.0969	4.05089	1.01852	chr14	6897565	6899565	UBFD1	77.0527	15.1928	6.33203	28.5128	3.24272	6.74939	10.2741	5.04674	6.68105	7.37477	4.22928	6.42793	6.44822	15.9225	7.00462	7.22951	5.96421	5.64537	3.95163	5.58978	0.167479	0.48033
chr14	6908537	6910019	6.46258	2.29358	13.1036	19.2709	2.81943	0	12.7531	0	0	0.2085	0.579323	0.195275	0.117647	0.213573	0.490196	0.169946	0.119048	21.7606	0.376766	10.4878	chr14	6907606	6909606	EARS2	1.0953	2.19586	2.52104	1.16823	0.935731	1.65896	4.561	2.12646	2.62791	0.916837	0.840967	2.49557	4.33256	1.70234	2.13356	1.07768	1.23253	1.43119	1.18778	1.1274	0.0319687	0.893564
chr14	7263542	7264438	0.036075	0	0.0649351	0	0.0919118	0.0510289	0.0202265	0.00942596	0	0	0.0985798	0	0.0539305	0	0.0223614	0	0.0600962	1.01954	0	0.406504	chr14	7261698	7263698	KDM8	2.73409	5.47442	2.69372	3.5045	11.9739	4.17967	6.31172	1.92162	4.27617	3.06286	8.60511	2.40918	3.63044	4.02292	6.72886	2.01198	4.12574	2.81341	2.41968	3.53048	-0.0793561	0.739463
chr14	7263542	7264438	0.036075	0	0.0649351	0	0.0919118	0.0510289	0.0202265	0.00942596	0	0	0.0985798	0	0.0539305	0	0.0223614	0	0.0600962	1.01954	0	0.406504	chr14	7261698	7263698	NSMCE1	4.25344	5.03048	3.00812	4.05521	4.54141	3.32188	4.82525	3.15835	5.19442	2.69605	4.64456	3.15125	2.36299	4.91063	4.51614	1.94365	2.85663	2.66249	1.94241	2.72862	-0.249083	0.289594
chr14	7275907	7277224	0.636535	0.580454	0	0.0238436	0	0.161933	0.0336022	0.0658328	0.0339213	0.0998407	0.439174	0	0.0913743	0.00971251	0.0307882	0.0291117	0.827674	0	0.686642	0.606454	chr14	7274474	7276474	IL4RA	2.93312	7.98897	4.83453	3.88506	1.31485	4.33147	2.80049	8.66074	14.8287	2.9124	1.19519	5.58721	2.39941	4.49079	3.42043	2.88433	3.84278	8.22748	3.77311	7.19846	-0.0786901	0.741577
chr14	7329414	7330512	0	0.618743	0.0207727	0	0.0150602	0.0607914	0.045372	1.18275	0.0378788	0.275482	0.0238095	0	0.0673703	0	0.0902615	0	0.120408	0.0693437	0	0	chr14	7327855	7329855	PDPK1	30.1748	14.9245	10.904	12.0682	22.818	10.5493	15.722	13.5044	17.5857	12.3811	20.1838	9.67151	9.5795	13.4512	12.2834	11.7613	9.40586	10.3218	10.4127	14.4904	-0.0631924	0.791262
chr14	7360344	7361279	0	1.11876	0	0.237311	0.0952381	0	0	0	0	0.0906537	0	0.0606061	0	0.287081	0	0	0.326797	0	0.0692654	0.171429	chr14	7358448	7360448	KCTD5	20.2886	15.0197	13.0793	10.4747	18.36	12.9089	17.0263	19.4971	12.448	10.6979	17.202	11.2418	8.24833	13.1283	12.8725	4.82223	10.7539	12.8952	9.44229	19.3258	0.0400478	0.866872
chr14	7393590	7394888	0.025355	0	0.0702096	0.0572082	0.0118203	0	0.0353982	0.0791139	0.0310945	0.0252525	0	0.042517	0.019305	0.0608727	0.0199124	0.0259583	0.0318013	0.0563548	0.0201288	0	chr14	7391779	7393779	UBE2I	29.3031	20.3368	20.33	19.5233	14.9047	15.3197	28.406	17.8347	21.7873	19.2712	13.9302	17.768	7.85313	21.4349	13.119	9.15766	13.2197	12.7475	9.94876	18.3122	0.210473	0.373093
chr14	7393590	7394888	0.025355	0	0.0702096	0.0572082	0.0118203	0	0.0353982	0.0791139	0.0310945	0.0252525	0	0.042517	0.019305	0.0608727	0.0199124	0.0259583	0.0318013	0.0563548	0.0201288	0	chr14	7391779	7393779	C14H16ORF42	7.69169	6.2078	5.44098	6.26247	3.66968	6.62975	9.82772	5.02577	5.68405	3.28999	3.46595	4.34191	2.74799	5.73999	8.39472	4.07029	3.43224	3.63428	2.48509	3.85887	0.0979901	0.681073
chr14	7410690	7411668	0.0358871	0.0588527	0.0526672	0.0260824	0.205377	0.0366427	0.148688	0.154241	0.374539	0.0305157	0.0673244	0.084366	0.0610346	0.059854	0.0410726	0.0214698	0.320034	0.143766	0.0312793	0	chr14	7409296	7411296	GNPTG	8.39886	21.6529	6.09369	10.2351	7.57346	6.5829	10.6358	7.49841	8.57318	6.23123	7.44438	8.82423	4.81267	9.27883	13.3442	10.0928	5.37745	7.49429	6.00701	8.10832	-0.153584	0.517971
chr14	7410690	7411668	0.0358871	0.0588527	0.0526672	0.0260824	0.205377	0.0366427	0.148688	0.154241	0.374539	0.0305157	0.0673244	0.084366	0.0610346	0.059854	0.0410726	0.0214698	0.320034	0.143766	0.0312793	0	chr14	7409296	7411296	UNKL	3.09309	3.80822	3.03476	2.48636	3.62009	2.13652	3.28973	2.54994	4.43539	2.45347	3.62854	3.2409	1.81399	8.5854	3.57069	1.35884	2.50752	2.58512	3.31537	5.42186	0.0195559	0.93478
chr14	7468358	7469292	0.743243	1.29263	5.03894	8.57563	1.3961	1.2407	1.09127	5.03003	2.29336	3.96796	1.45408	4.97541	3.30674	3.92667	1.40845	1.64103	2.22157	3.44086	0.869709	5.91617	chr14	7466581	7468581	C16ORF45	31.3671	0.15844	0.298215	10.636	89.6991	0.992054	16.355	0.315449	1.06585	11.5616	58.3781	2.11617	0.741391	55.4449	0.569828	0.475019	2.41879	1.70645	8.92837	2.19796	-0.226048	0.337907
chr14	7468358	7469292	0.743243	1.29263	5.03894	8.57563	1.3961	1.2407	1.09127	5.03003	2.29336	3.96796	1.45408	4.97541	3.30674	3.92667	1.40845	1.64103	2.22157	3.44086	0.869709	5.91617	chr14	7466581	7468581	KIAA0430	13.8678	7.13898	5.48119	5.49843	5.95231	5.18768	4.70251	3.2478	7.83669	5.27966	5.62996	5.78305	3.9574	9.86957	4.85941	3.73015	4.44271	6.17388	4.53876	10.4657	-0.0164552	0.945104
chr14	7624408	7629089	0.98704	0.392892	0.255188	0.118547	0.180385	0.52689	0.137493	0.282495	0.240128	0.0813489	0.374078	1.822	0.426603	1.71626	0.364459	0.0486215	0.01734	0.809991	0.707323	0	chr14	7625756	7627756	ABCC1	17.4	3.25545	14.8033	13.08	5.61792	11.0377	14.497	21.1915	29.3436	10.2141	4.82649	10.1114	5.29305	27.2459	7.87832	8.04618	19.2168	13.9901	10.6797	21.7166	0.143855	0.54513
chr14	8320320	8321139	0.0400641	0	0.0431406	0.0818011	0.12839	0	0.0779871	0	0	0.0802429	0.178063	0.0133547	0.167189	0.0276775	0.0854701	0	0	0.134757	0.0447032	0.0439542	chr14	8320920	8322920	ENSGALG00000006829	25.9898	6.90064	7.38048	8.31327	4.56518	5.0699	6.34942	4.53789	8.08207	7.27874	4.99659	6.70161	2.6735	5.10392	4.27268	4.31394	3.6319	6.54075	5.00239	9.87979	-0.134132	0.572896
chr14	8543842	8545036	0.0449236	0.03663	0.0390625	0.0417711	0.0978785	0	0	0	0	0	0.0302024	0.0188929	0.050813	0.03125	0	0.0528681	0.0584112	0	0.104605	0.0618812	chr14	8542479	8544479	C16orf52	12.0678	11.1613	6.40332	7.47524	11.3637	6.3267	6.4797	5.04833	8.72361	6.50761	9.0637	5.05759	7.57908	12.7849	7.13227	3.91595	6.82489	7.633	9.45256	7.03488	0.351906	0.128111
chr14	8635048	8637097	0	0.340136	0	0.0505051	0.326797	0	0.271739	1.22549	1.85905	0	0.285152	0	0	0	0	0	0	0.909091	0.201613	0	chr14	8633904	8635904	EEF2K	48.4816	22.3633	6.13303	17.6078	7.73415	16.7998	6.57544	18.0561	13.7225	10.6137	7.21002	8.74103	9.89202	31.1613	17.6078	157.8	9.59941	16.2287	11.6181	34.2209	-0.156994	0.508608
chr14	8704378	8706905	0.527242	0.811618	1.16187	0.224881	2.01767	0.142438	0.350247	1.5879	0.622596	0.0858771	1.9489	7.06308	1.03789	0.545195	0.124391	0.180432	1.04135	0.389937	0.231736	3.77331	chr14	8703893	8705893	ENSGALG00000007030	1.43023	3.78682	1.19554	1.53719	0.632298	3.72584	6.78073	2.77244	3.30555	3.52545	0.458192	4.06398	2.14415	0.9108	6.22621	7.74555	2.49374	2.72109	1.52078	5.43503	0.0157659	0.947401
chr14	8783517	8784831	0.15771	0.031622	0.204189	0	0.043669	0.0917148	0.0494805	0.0505051	0	0	0.0707846	0.0555556	0.236767	0.0793651	0.0622867	0.133425	0.0903342	0.157398	0.042517	0	chr14	8781750	8783750	KDELR2	37.5625	58.6695	18.4195	42.5483	17.467	24.6849	62.6933	35.6101	20.0467	61.2334	16.3128	50.806	20.6618	23.5418	41.1201	29.5814	15.1652	33.7365	25.7982	45.9904	-0.426623	0.0606729
chr14	8796036	8797085	0.154321	1.36986	0.917431	1.96922	0	1.65289	0	1.86916	3.19635	0.843785	3.7037	1.84874	0.265957	1.83824	0	0.0705716	0	1.7094	0.0533709	0	chr14	8794545	8796545	DAGLB	10.7567	4.88701	1.82139	4.48041	8.18339	3.04759	1.69397	2.87548	3.72671	1.54994	7.81726	2.25204	1.87404	3.66582	7.25909	3.47195	2.28284	3.13081	4.36068	6.24889	-0.0543362	0.82002
chr14	8796036	8797085	0.154321	1.36986	0.917431	1.96922	0	1.65289	0	1.86916	3.19635	0.843785	3.7037	1.84874	0.265957	1.83824	0	0.0705716	0	1.7094	0.0533709	0	chr14	8794545	8796545	CRAC1A	80.9853	60.3132	31.371	56.8127	111.24	51.1861	63.0828	62.7623	41.6385	88.1787	107.782	85.3351	38.4022	82.0181	39.4143	34.2661	78.9686	68.3763	36.7136	83.4941	0.167356	0.480656
chr14	8933221	8935797	39.0305	24.3311	31.7996	40.5472	37.4965	37.541	33.515	36.6841	13.3314	26.7154	41.1343	34.2243	26.7973	21.9964	42.3852	37.1035	41.3706	29.0922	16.4393	28.8559	chr14	8931356	8933356	SOCS1	1.42715	14.5894	3.70545	3.63002	1.63176	5.85662	6.09412	6.72697	11.9788	2.93442	1.03774	4.09163	1.9375	8.22428	2.3915	0.903688	14.8396	12.2722	2.41568	4.11144	-0.307764	0.186817
chr14	9047623	9050322	8.26056	0.206386	0.886504	0.0539858	0.058475	0.32144	0.361953	0.847458	0.269282	0.0603467	0.492357	0.990291	0.39338	0.0484496	0.0152579	0.0600281	0.0830366	0.0581285	0.0755708	0	chr14	9047565	9049565	CIITA,ENSGALG00000007206	1.00175	1.96981	7.34519	1.37366	0.445403	2.12479	0.648696	4.69607	38.2763	0.806288	0.444732	2.60276	1.45763	1.7958	0.473836	0.212187	2.2793	5.80317	0.731595	3.28347	-0.0630991	0.791564
chr14	9113272	9114343	6.11111	0.506823	7.84091	2.27273	23.5294	7.60697	5.65476	8.26525	0.821895	2.27273	10.3704	7	2.22222	0	9.30556	10	5.88235	3.46154	0	0	chr14	9113587	9115587	TEKT5	0	0.160011	0	0.0764399	0.257053	1.16603	0.325573	16.8954	0.0588442	0.199149	0.246762	0.0813908	0.151109	0.199833	0	0.382379	3.50705	1.14672	0.84387	11.625	-0.0479374	0.840938
chr14	9181968	9183196	0.722929	1.3809	0.263505	0	1.45234	0.0496771	0	0.241546	0.923389	0.15873	3.38362	2.25989	0.114976	1.72414	0	0.242131	0	0.0224014	0	0	chr14	9180193	9182193	EMP2	7.98672	2.83195	3.90508	24.4729	3.14606	45.2866	16.9817	53.0076	9.0303	16.7273	2.88509	19.86	8.13403	45.5073	66.598	8.2214	90.0905	31.432	20.517	46.9008	-0.369492	0.108856
chr14	9241125	9243247	2.76051	0.67598	0.930956	0.123457	0.35078	0.17848	0.397688	4.1166	4.09795	0.727562	13.807	1.11111	0.584226	0.304223	0.490863	0.38855	0.569649	1.84853	1.42857	0	chr14	9239796	9241796	GRIN2A	0.247972	0	0.0798551	0.475982	29.1666	1.08502	2.52737	0.433812	0.453501	7.57118	23.037	0.464001	0.0308764	0.133139	0.243162	0.212323	1.48873	0.18265	7.16965	0.567682	0.46845	0.037228
chr14	9241125	9243247	2.76051	0.67598	0.930956	0.123457	0.35078	0.17848	0.397688	4.1166	4.09795	0.727562	13.807	1.11111	0.584226	0.304223	0.490863	0.38855	0.569649	1.84853	1.42857	0	chr14	9239796	9241796	GRIN2A	0.0649446	0.0652077	0.0186201	0.0465304	1.80396	0.0829704	0.153949	0.00631884	0.0543101	0.654822	1.3583	0.0233952	0.00438789	0.003838	0.00792552	0.0523837	0.210882	0.0233225	0.609434	0.0417988	0.426194	0.0609608
chr14	10052087	10055796	1.10514	0.629243	1.94932	0.898272	1.23061	1.13356	1.33465	1.88746	0.600994	1.28404	0.771314	1.72355	0.931359	1.44543	1.07323	0.603759	2.0318	1.07728	0.892401	1.14638	chr14	10053065	10055065	ABAT,TMEM186	12.6145	14.6235	2.56817	5.51198	18.1056	2.96619	2.43064	2.05818	5.09461	2.50358	21.4399	3.5637	13.6818	2.89046	3.59488	2.56407	1.5925	2.47557	5.83477	4.51014	-0.435455	0.0549773
chr14	10052087	10055796	1.10514	0.629243	1.94932	0.898272	1.23061	1.13356	1.33465	1.88746	0.600994	1.28404	0.771314	1.72355	0.931359	1.44543	1.07323	0.603759	2.0318	1.07728	0.892401	1.14638	chr14	10053065	10055065	ABAT	3.52861	0.905023	0.666969	1.34072	0.678588	0.999664	0.296472	0.486149	1.22467	0.822661	0.73147	0.757573	0.728559	0.844749	0.806769	0.956591	0.491724	0.690461	0.914963	1.30533	-0.266722	0.25564
chr14	10052087	10055796	1.10514	0.629243	1.94932	0.898272	1.23061	1.13356	1.33465	1.88746	0.600994	1.28404	0.771314	1.72355	0.931359	1.44543	1.07323	0.603759	2.0318	1.07728	0.892401	1.14638	chr14	10053065	10055065	ABAT	17.8895	28.9796	1.53708	7.13924	64.3158	1.41879	2.11308	0.799269	1.71382	1.60803	72.8649	3.68959	37.9919	0.715501	2.06696	0.996732	1.18833	0.818677	13.2554	1.54739	-0.321869	0.166384
chr14	10100525	10101632	0.461625	0.042735	0.111539	0.292642	0.596383	0.86629	0.143244	0.304518	0.203967	0.225469	0.59008	0.517216	0.104597	0.790395	0.22867	0.895867	0.449477	0.616101	0.876146	0.365807	chr14	10101458	10103458	METTL22	11.582	3.58596	1.83802	5.61098	2.82824	2.92545	4.1295	1.99226	2.0797	2.59158	2.57397	1.90794	2.27302	5.72368	3.64099	1.55785	1.30232	2.5368	2.4788	3.07324	-0.00331305	0.98894
chr14	10118832	10119356	8.09281	2.86984	6.12969	1.37321	0.666521	1.55844	0.309011	5.57471	6.77789	4.07844	2.46503	2.70793	1.96793	0.679255	1.51515	1.68733	1.53177	3.06122	0.86583	5.81451	chr14	10116842	10118842	TMEM114	0	0	0	0	0.100357	0.0479809	0.247336	0	0.00862049	0	0.350795	0	0	0	0.825173	0	0.0115585	0.15055	0.34564	0	-0.341371	0.140743
chr14	11932851	11933473	0.123077	0.0334414	0.068836	0.0790514	0.0503771	0.107817	0.0653595	0.150681	0.462256	0	0.0854366	0.0326797	0.0899621	0.0671319	0.0149343	0.0504785	0.183537	0.0402115	0.138016	0	chr14	11931134	11933134	GTF3C1,SNRNP25	23.9517	37.6702	31.6217	34.7333	27.8199	38.9057	40.3943	36.7953	30.0898	19.1165	23.769	21.9595	27.8747	36.5714	32.189	29.3202	28.4892	38.6153	26.4519	12.0889	0.125665	0.597566
chr14	11932851	11933473	0.123077	0.0334414	0.068836	0.0790514	0.0503771	0.107817	0.0653595	0.150681	0.462256	0	0.0854366	0.0326797	0.0899621	0.0671319	0.0149343	0.0504785	0.183537	0.0402115	0.138016	0	chr14	11931134	11933134	POLR3K	21.6979	11.515	11.4601	14.7105	7.11522	4.75998	6.65887	7.70265	3.47852	13.7939	10.2708	14.3452	6.47294	17.6093	17.6462	2.58097	12.4274	7.4738	9.89572	1.05056	-0.206328	0.382794
chr14	11932851	11933473	0.123077	0.0334414	0.068836	0.0790514	0.0503771	0.107817	0.0653595	0.150681	0.462256	0	0.0854366	0.0326797	0.0899621	0.0671319	0.0149343	0.0504785	0.183537	0.0402115	0.138016	0	chr14	11931134	11933134	ENSGALG00000007434	8.19829	11.6194	3.65001	9.08951	7.39408	5.32515	5.52743	9.15927	5.21441	4.95889	6.50973	5.91134	5.99443	19.948	2.09229	35.7664	8.29453	9.2451	6.43415	4.9746	-0.103394	0.664446
chr14	12121204	12122584	0	2.02957	0.157233	0.131098	0.104822	2.91796	2.65873	3.40909	3.06174	0.131075	4.68165	2.00559	0	0.0342935	2.77778	0	4.16667	4.08163	3.26873	0.0314465	chr14	12119978	12121978	MRPL28	44.5228	78.2655	27.0308	38.109	35.9451	34.2102	56.4122	42.8679	22.2215	18.663	41.6274	25.5482	38.2417	42.3427	39.6696	26.4667	26.9743	29.5001	24.2873	6.6086	0.126069	0.596379
chr14	12232241	12242515	67.7873	45.7794	72.3726	64.9565	65.2158	64.9383	66.799	69.84	61.7132	62.5664	63.7998	65.1131	63.4759	65.5491	65.8021	56.7495	67.9847	69.1213	63.3356	67.2666	chr14	12236661	12238661	ENSGALG00000026609	3.22885	0.164146	1.37293	4.15372	5.50465	4.99816	2.44618	1.24537	2.96815	1.25311	4.50453	5.01926	1.33376	3.4208	1.58127	0.310838	1.48542	11.6008	21.849	1.85012	0.131201	0.581386
chr14	12232241	12242515	67.7873	45.7794	72.3726	64.9565	65.2158	64.9383	66.799	69.84	61.7132	62.5664	63.7998	65.1131	63.4759	65.5491	65.8021	56.7495	67.9847	69.1213	63.3356	67.2666	chr14	12233025	12235025	ARHGDIG	2.74567	0	5.71644	15.2782	75.1623	17.1797	37.4517	9.28779	5.08017	6.98254	75.7729	9.39328	6.26138	12.9418	5.27752	5.73725	9.16907	24.9474	38.2859	1.70381	0.110283	0.643466
chr14	12232241	12242515	67.7873	45.7794	72.3726	64.9565	65.2158	64.9383	66.799	69.84	61.7132	62.5664	63.7998	65.1131	63.4759	65.5491	65.8021	56.7495	67.9847	69.1213	63.3356	67.2666	chr14	12241948	12243948	ENSGALG00000007514	12.3448	30.9247	9.74881	9.51835	9.16271	9.69305	31.2449	17.3394	10.613	11.8806	10.7922	8.79103	13.2936	12.818	11.5513	4.85875	12.3796	12.1984	17.2184	10.0899	-0.364349	0.114256
chr14	12262425	12263518	2.27273	3.53948	6.39194	1.59491	1.52637	4.30403	1.80316	5.61224	4.22841	4.5854	3.80527	2.19388	1.5873	5.35714	1.41844	0.882825	1.4881	1.26582	3.61852	6.89474	chr14	12260942	12262942	LUC7L	1.35665	3.65851	2.25863	1.20681	2.16542	1.88396	1.44891	3.3475	3.25981	1.84867	1.84501	1.72217	1.24275	1.86176	2.64702	1.39019	2.03327	2.2716	1.98044	4.76226	0.580858	0.00723948
chr14	12346248	12349303	12.6485	15.2072	17.7922	17.7876	16.6491	11.5475	11.7729	14.0925	15.3717	17.524	18.0532	14.5917	14.0869	14.1995	12.5776	4.12233	17.4303	17.2373	19.893	17.1409	chr14	12346842	12348842	MGRN1	9.97518	10.816	11.043	8.99053	28.5056	17.3326	15.6697	13.6503	9.20719	12.0479	30.2766	15.0575	12.7076	9.44786	10.5983	11.3871	8.85109	15.1686	12.855	12.0897	0.15144	0.5239
chr14	12490912	12493947	12.6217	14.6193	24.7036	10.5529	13.0062	9.2712	14.0947	11.7342	17.5763	6.27924	13.767	18.0732	9.4018	18.5141	14.318	13.9163	28.1294	15.6015	8.63851	21.2856	chr14	12492148	12494148	ADCY9,CREBBP	182.069	36.7833	40.959	61.4851	22.2196	27.8226	26.3279	25.63	28.5683	40.9303	27.0366	29.5006	22.9145	45.3903	34.2243	38.7923	29.0595	31.9812	27.2043	37.8516	-0.0758491	0.750618
chr14	12693393	12701744	45.7841	19.9159	43.5208	39.3426	49.6512	35.7266	39.4002	39.7437	29.3864	36.9342	45.6719	45.3897	32.8222	40.049	35.0682	20.3129	32.8309	31.3308	38.7172	39.4303	chr14	12692314	12694314	VASN	2.2547	3.80295	2.09867	6.92557	1.58926	3.61252	11.9024	5.76992	2.88473	7.75915	1.07942	5.6047	1.81	2.26272	13.9248	2.3074	4.16399	7.31709	6.1701	2.82076	-0.0659131	0.782477
chr14	12693393	12701744	45.7841	19.9159	43.5208	39.3426	49.6512	35.7266	39.4002	39.7437	29.3864	36.9342	45.6719	45.3897	32.8222	40.049	35.0682	20.3129	32.8309	31.3308	38.7172	39.4303	chr14	12692314	12694314	DNAJA3	67.4742	38.5419	11.1307	30.4487	20.3496	16.7783	16.3438	9.83225	12.6125	9.61333	17.0698	9.76097	20.8539	57.4456	13.8971	14.4866	13.815	10.9131	14.6459	7.38271	0.0980754	0.680809
chr14	12693393	12701744	45.7841	19.9159	43.5208	39.3426	49.6512	35.7266	39.4002	39.7437	29.3864	36.9342	45.6719	45.3897	32.8222	40.049	35.0682	20.3129	32.8309	31.3308	38.7172	39.4303	chr14	12692314	12694314	CORO7	3.943	11.0271	50.6204	11.1028	32.6405	10.1191	8.22835	21.9856	37.475	5.008	37.6974	21.5905	5.53018	6.83491	10.6521	1.86382	13.0637	19.4464	16.7894	6.73832	0.35895	0.120128
chr14	12693393	12701744	45.7841	19.9159	43.5208	39.3426	49.6512	35.7266	39.4002	39.7437	29.3864	36.9342	45.6719	45.3897	32.8222	40.049	35.0682	20.3129	32.8309	31.3308	38.7172	39.4303	chr14	12692314	12694314	VASN	1.1792	10.2958	3.31287	5.50661	1.47644	5.84303	19.6041	8.51172	1.62779	15.5498	2.41002	7.90511	0.52471	1.80722	26.9991	1.19416	6.54876	17.3542	7.35828	4.84106	-0.143113	0.547226
chr14	12693393	12701744	45.7841	19.9159	43.5208	39.3426	49.6512	35.7266	39.4002	39.7437	29.3864	36.9342	45.6719	45.3897	32.8222	40.049	35.0682	20.3129	32.8309	31.3308	38.7172	39.4303	chr14	12692314	12694314	NMRAL1	14.3977	7.89209	7.95249	10.3029	14.9263	9.23147	7.35062	14.2929	9.9583	4.65556	11.5349	9.92599	10.7278	16.1445	21.3694	12.9659	10.434	7.21551	16.8585	11.9533	0.198827	0.400703
chr14	12747987	12748870	0.704225	5.35121	1.90476	0.297619	0.25	0	1.50794	0.47619	0.374532	0.42082	0.238095	1.47392	0.416667	1.45306	2.97619	1.4652	0	0	0.439841	0	chr14	12747802	12749802	NLRC3	0.871944	1.06603	11.7717	1.24843	0.096235	1.66736	0.302358	1.50657	18.2148	0.128222	0.125813	2.34771	0.738718	1.62276	0.515908	0.657986	1.67791	2.36798	0.678101	0.696844	-0.0141456	0.9528
chr14	12747987	12748870	0.704225	5.35121	1.90476	0.297619	0.25	0	1.50794	0.47619	0.374532	0.42082	0.238095	1.47392	0.416667	1.45306	2.97619	1.4652	0	0	0.439841	0	chr14	12747802	12749802	CLUAP1	1.14038	4.77982	1.99797	2.20685	11.1355	2.79962	5.34842	4.40344	2.50136	2.65649	9.48728	3.04137	6.53764	4.16741	5.55675	11.4246	2.05952	4.30776	3.18995	3.09059	0.0732133	0.759034
chr14	12846925	12847582	0	0.0799361	0	0	0	0	0	0.641026	0	0	0	0.0674764	0	0	0	0	0	0.273224	0	0.030525	chr14	12845697	12847697	ENSGALG00000021344	0.153384	0.949242	0.103806	0.254248	0.414141	0.180186	2.82761	0.446365	0.16741	0.248754	0.708053	0.433331	0.282139	0.557558	0.64985	0.135598	0.214799	0.248501	0.445728	0.395191	-0.0379842	0.873677
chr14	12936621	12953935	27.8026	24.4943	33.2753	28.4624	22.1377	24.4708	27.1569	28.5504	26.2889	29.6576	23.3407	31.4927	27.8071	30.482	28.0194	28.7193	30.6586	30.8231	28.1461	31.8248	chr14	12935941	12937941	SBK1	0	0	0	0.220898	3.98576	1.95735	0	0.988047	0.0625534	0.321418	6.17804	0.269304	0.250681	17.2022	3.73556	0	0.386917	0.460215	9.76808	1.32738	-0.0580602	0.807898
chr14	12936621	12953935	27.8026	24.4943	33.2753	28.4624	22.1377	24.4708	27.1569	28.5504	26.2889	29.6576	23.3407	31.4927	27.8071	30.482	28.0194	28.7193	30.6586	30.8231	28.1461	31.8248	chr14	12951477	12953477	XPO6	5.16573	13.8699	15.7381	5.76469	10.3279	8.58513	14.6246	11.4188	25.5349	17.9019	11.5074	9.0472	5.89042	8.39606	13.6106	7.34929	8.84475	10.3271	7.18879	10.2011	-0.0696114	0.770577
chr14	13001522	13004402	66.84	3.37634	51.4213	42.102	45.7393	45.3727	39.1543	47.9436	51.8635	52.8462	44.8918	50.7305	45.2223	46.9024	65.6132	39.3753	44.2805	60.2353	49.9355	49.4388	chr14	12999719	13001719	NME4	0.564294	1558.41	0	0.32987	0.639674	2.35648	2.97898	0	0.391435	5.04807	0	0	0.620477	1.18055	6.30153	0	11.6104	0.643668	1.19133	0	-0.808192	1.62497e-05
chr14	13001522	13004402	66.84	3.37634	51.4213	42.102	45.7393	45.3727	39.1543	47.9436	51.8635	52.8462	44.8918	50.7305	45.2223	46.9024	65.6132	39.3753	44.2805	60.2353	49.9355	49.4388	chr14	13001753	13003753	DECR2	17.4896	107.479	9.81091	16.8816	20.0107	15.2566	36.5482	29.2187	12.8575	8.51774	15.9689	12.9055	70.1504	21.4189	21.1409	11.4813	10.3096	16.7604	15.5749	8.39731	-0.722912	0.000316953
chr14	13009460	13011193	24.0232	9.0535	36.2895	22.0342	10.3271	25.6494	26.2338	40.4245	23.5417	21.5261	22.5855	23.6763	30.756	24.0096	13.7838	25.8347	57.9279	30.7692	35.0339	42.3612	chr14	13008001	13010001	RAB11FIP3	10.8881	8.82624	3.69493	7.7462	35.5099	12.0222	20.0176	12.6832	4.98276	12.1715	40.6124	14.7589	51.0678	6.01262	10.4891	14.2684	16.4514	8.11895	11.0307	7.50878	-0.107013	0.653393
chr14	13050359	13066272	48.1636	45.2236	56.2658	46.1362	61.0687	53.3656	55.8177	60.587	54.8584	53.3842	54.2263	41.6277	56.4143	53.199	40.8838	48.3385	48.8392	59.1243	54.916	58.2817	chr14	13051796	13053796	ENSGALG00000029027,SEPT12	1.09402	3.08117	31.0596	0.983807	6.66541	13.7655	4.19797	5.1687	19.4042	2.27805	9.04174	10.7287	3.68642	1.5317	0	1.60469	10.224	5.46565	2.45904	0.185856	0.191069	0.419699
chr14	13050359	13066272	48.1636	45.2236	56.2658	46.1362	61.0687	53.3656	55.8177	60.587	54.8584	53.3842	54.2263	41.6277	56.4143	53.199	40.8838	48.3385	48.8392	59.1243	54.916	58.2817	chr14	13062447	13064447	ENSGALG00000002610	10.1366	1.71677	5.89758	12.142	29.9373	4.87931	12.3962	1.30275	6.16663	6.27607	29.7122	2.91874	9.81115	23.936	5.19961	1.26032	5.68104	3.55784	3.9285	0.92108	0.239907	0.308302
chr14	13050359	13066272	48.1636	45.2236	56.2658	46.1362	61.0687	53.3656	55.8177	60.587	54.8584	53.3842	54.2263	41.6277	56.4143	53.199	40.8838	48.3385	48.8392	59.1243	54.916	58.2817	chr14	13062447	13064447	MSS51	18.6758	0	0.380543	5.89889	0.127127	0	0.108394	0.211782	0.292057	0.0670546	0.218327	0.0962737	0.135052	60.3069	0.343063	0	0	0.930313	0.883477	0	-0.0449527	0.850732
chr14	13205546	13207187	0.0724041	1.43454	0	0.408163	0.274229	0.680272	0.00807624	0	0.0555864	0.0995025	0.0293255	0.0242866	0.431034	0	0.00953107	0.434783	0.0124208	0	0	0	chr14	13204717	13206717	SPSB3	25.2158	9.87779	6.39861	12.5251	7.26796	7.49121	10.6856	8.61825	6.46427	6.49992	8.00441	4.97966	5.83096	8.33567	7.56651	6.60927	7.7259	6.67165	6.97698	6.53668	0.0472628	0.84315
chr14	13222900	13228694	0.516109	3.81786	3.37489	0	0.970831	1.24682	2.60237	1.3007	1.4351	0.694444	2.87119	6.84074	2.02657	0.773542	1.17789	0.788123	2.8324	5.02376	0.625	0.694444	chr14	13225859	13227859	UBN1	4.14277	2.98684	3.20592	2.26802	2.47342	1.89351	2.35395	2.35165	2.94179	3.0398	3.07086	2.64496	1.38669	2.48351	2.07635	2.59402	2.38371	2.38721	2.37758	4.36851	-0.0785061	0.742162
chr14	13222900	13228694	0.516109	3.81786	3.37489	0	0.970831	1.24682	2.60237	1.3007	1.4351	0.694444	2.87119	6.84074	2.02657	0.773542	1.17789	0.788123	2.8324	5.02376	0.625	0.694444	chr14	13221407	13223407	NME3	14.3334	8.73503	9.91832	10.4328	32.2322	8.10216	18.2561	5.42597	8.71283	8.57939	29.926	6.47559	10.1918	7.05394	16.2506	7.88292	7.30644	7.41798	9.96693	4.44169	-0.0857973	0.719105
chr14	13325005	13325704	4.98485	2.1571	23.4514	3.92054	2.91454	1.94221	1.28554	6.54132	6.28212	5.34354	2.0667	11.096	8.13055	4.96957	0.679456	4.65002	6.19251	3.2281	8.07486	20.0957	chr14	13323252	13325252	SEC14L5	9.47483	1.84809	2.68499	5.01635	11.6382	0.631858	1.05546	1.66407	13.3342	0.687427	10.5168	2.13308	0.677106	1.78492	0.751494	0.402114	1.9927	1.53607	6.0163	0.763239	-0.140909	0.553478
chr14	13378725	13379468	1.23604	3.24813	1.00824	0.522239	0.933155	0.243056	0.83727	1.11054	0.364583	0.425303	0.953085	0.874401	0.958769	0.306818	1.16028	1.78483	0.937225	0.391226	0.830314	0.260417	chr14	13377011	13379011	ENSGALG00000002067	3.5271	12.047	6.21518	3.92414	8.23971	6.85577	6.26299	7.35891	8.05311	6.82094	7.5053	6.60584	6.09761	5.18489	13.8847	10.3888	6.68845	6.40242	4.63875	7.14104	0.54956	0.0120723
chr14	13392864	13400072	4.34282	0.998126	2.27492	3.08468	1.80934	1.11458	10.6617	7.96021	2.49651	0.955201	0.762317	3.17384	2.92703	1.47194	0.892857	2.96499	0.572707	3.1622	0.835312	3.0181	chr14	13391594	13393594	NDUFB6	127.64	103.516	49.2077	185.135	64.6346	69.9173	74.847	36.5792	27.8692	41.5533	78.267	38.4334	111.099	282.183	56.3418	23.4615	39.5086	38.624	69.1862	17.4068	-0.0754804	0.751794
chr14	13392864	13400072	4.34282	0.998126	2.27492	3.08468	1.80934	1.11458	10.6617	7.96021	2.49651	0.955201	0.762317	3.17384	2.92703	1.47194	0.892857	2.96499	0.572707	3.1622	0.835312	3.0181	chr14	13394637	13396637	ENSGALG00000021386	0	0	0	0	0	0	0	0.51271	0	0	0	0.5766	0	0	0	0	0	0	0	0	0.359614	0.119395
chr14	13529727	13531529	1.66667	5.55319	22.3547	9.19564	4.07581	2.13178	6.39145	4.89604	3.67521	15.0404	7.44139	4.40821	15.6899	14.1569	4.16667	1.60401	28.2552	4.40678	19.2681	16.6299	chr14	13528713	13530713	RAB40C	4.59924	3.4008	4.03018	4.37796	14.7496	6.75075	5.13252	12.2954	3.96325	4.37233	15.6116	3.69934	2.79812	4.93386	8.91621	3.61441	8.10655	6.77978	5.81289	6.01942	-0.140134	0.555684
chr14	13691153	13692231	0.0369959	0	0.030525	0	0.10453	0	0.134922	0.0692757	0	0.0312695	0.0347222	0	0	0.0686813	0.0914703	0.0515957	0	0.0468721	1.2987	0	chr14	13691612	13693612	ENSGALG00000009341	9.23819	4.9355	5.36063	4.95953	5.76388	5.3367	3.6951	5.45307	7.73579	4.51739	5.55608	4.87988	2.93742	6.41554	5.47831	3.76462	4.57718	4.96924	5.47254	5.19918	0.0233536	0.922148
chr14	14266055	14267393	67.651	39.4179	46.944	61.6316	66.8013	44.0582	47.1225	49.7037	41.2584	51.8519	51.5827	54.7347	57.581	53.6854	45.0608	52.3631	47.1335	33.677	52.1514	53.1609	chr14	14264560	14266560	CCNF	1.79526	1.90924	9.38434	1.55903	1.82216	1.18455	8.53617	3.99069	4.35112	1.60386	1.72263	2.32031	1.11715	1.53382	1.89032	1.25025	1.15933	1.61543	1.18296	2.54158	-0.212169	0.369165
chr14	14311952	14313745	1.19048	1.03734	0.102052	0.333333	0	0.76448	0.268054	0.05226	0.116978	0	0.034438	0.268817	0.149134	0	0.477244	0.0617284	0	0.503356	0	0	chr14	14310615	14312615	MAPK8IP3	3.07162	3.56956	6.78274	3.69709	54.2095	5.48786	5.96962	3.34937	10.6121	7.63599	45.5963	6.50187	2.20841	7.54023	3.57208	2.55556	5.51407	5.11336	16.4783	5.22279	-0.317811	0.172099
chr14	14389569	14391525	0.0853839	0.552486	0.96432	0.291769	0.257392	0.909091	0.074267	0	0.216233	0.110579	0.125922	0.186033	0.190779	0.229208	0	0.0788752	0.130224	0.191741	1.68403	0.022686	chr14	14388893	14390893	GLYR1	21.2582	25.6172	25.4471	14.1778	24.3648	13.7523	19.5525	13.5652	20.8427	16.3735	20.7696	20.1233	16.5504	19.3736	13.7255	11.6119	14.9338	17.0966	13.7295	18.7245	0.0272311	0.909269
chr14	14604239	14605731	6.74302	2.74062	29.1569	15.6632	4.0951	3.13726	6.38095	7.97619	8.92694	22.9704	2.79054	6.43769	1.7757	4.23672	0.923077	7.42864	11.2993	20.2326	5.19525	9.75578	chr14	14602689	14604689	GPR139	0.0446056	0	0	0.0168377	1.41728	0.0928117	0.252841	0.0704432	0.0317029	0.17568	1.48218	0.161076	0.0237612	0	0.0152077	0.189125	0.00853005	0.00898514	0.182244	0.102778	-0.258857	0.270453
chr14	14926646	14927421	0	1.62338	0	0	3.07692	0	0.154321	0	5.14706	0	0.37037	3.07692	0	1.53846	3.84615	0	1	0	0.105932	2.85714	chr14	14927244	14929244	ENSGALG00000002239	2.48831	3.00196	3.21952	2.52259	2.45825	2.60362	3.21327	2.37132	3.91118	2.49475	2.9225	2.8316	1.44565	1.89282	2.00725	1.51636	1.65088	2.93536	1.93676	5.51318	0.384115	0.0945117
chr14	14965815	14967352	0	0.311653	0.260756	0	0.132626	0	0	1.30102	0.267455	0	0.166667	1.22549	0	0	0	0	0	0	0	0.510204	chr14	14965077	14967077	LYRM1	18.8166	13.9219	6.78825	9.2637	9.06231	6.96469	5.52877	5.10824	6.65511	4.83151	6.9652	5.63617	5.27566	13.8156	6.99071	5.4481	4.92665	4.5268	5.88145	4.02877	-0.197273	0.404471
chr14	15065675	15069320	37.1675	50.8091	37.9339	34.0258	49.8731	39.2245	41.4724	38.9088	31.2041	41.4351	55.2622	35.6807	21.9321	31.797	34.7824	42.6843	35.2209	43.8505	41.6924	32.3516	chr14	15066802	15068802	ANKS4B	0.132324	0	0.140928	0.0417773	0.139002	0.0489442	0.063377	0.0374847	0.0273828	0	0.40279	11.601	37.3047	0	0	0.308277	0	0	0.167369	0	-0.531793	0.0158084
chr14	15080840	15086016	10.5762	12.1643	12.7226	9.14852	16.3466	7.91186	8.43166	11.4322	18.7205	11.4805	7.08282	12.7152	7.77002	16.3399	5.79546	10.492	10.1351	17.2803	10.2004	14.0581	chr14	15083439	15085439	UQCRC2	129.842	152.791	39.1431	71.3884	81.8935	58.477	60.3317	45.4749	34.7542	32.1559	72.3694	42.1622	96.0834	334.988	50.7617	61.1586	29.9356	31.9061	58.0606	17.7804	0.170692	0.471826
chr15	82977	84171	0.0350631	0	0	0.910364	0	0.0191516	0.0417101	0.0143567	0	0.0107458	0.0401768	0.469219	0	0.0731753	0	0.0729167	0.036075	0	0.630314	0.022409	chr15	81606	83606	PI4KA	19.3603	22.5482	14.354	12.8502	28.1089	11.7047	12.7141	11.1657	20.3803	10.5398	27.6614	11.4289	10.7535	20.0918	16.19	12.397	13.8435	12.6072	12.9172	14.0748	-0.244978	0.297875
chr15	82977	84171	0.0350631	0	0	0.910364	0	0.0191516	0.0417101	0.0143567	0	0.0107458	0.0401768	0.469219	0	0.0731753	0	0.0729167	0.036075	0	0.630314	0.022409	chr15	81606	83606	SERPIND1	2.63385	789.886	3.01164	1.80887	1.84287	3.05052	1.27272	2.03864	2.70789	1.92768	1.75339	2.4896	1.02177	2.51829	1.66132	1.99951	1.71121	2.00648	2.15567	5.92505	-0.112608	0.63644
chr15	442119	443961	12.5	5.44761	24.4898	5.32357	12	12.2685	3.9548	7.89474	12.9405	5.09373	35.625	11.8421	5.55556	17.284	3.84615	1.04167	0	11.9718	9.90338	10.7407	chr15	441710	443710	TOP3B	11.6406	9.43022	6.31047	7.16913	6.43272	6.09313	7.55563	6.21637	10.6799	4.76607	5.11555	5.7322	5.72857	8.08682	8.88124	5.58745	6.75403	5.29051	5.33024	6.31493	-0.101602	0.669942
chr15	442119	443961	12.5	5.44761	24.4898	5.32357	12	12.2685	3.9548	7.89474	12.9405	5.09373	35.625	11.8421	5.55556	17.284	3.84615	1.04167	0	11.9718	9.90338	10.7407	chr15	441710	443710	TOP3B	0.369863	1.00352	0.655404	0.513072	0.820558	0.38721	0.239941	0.516848	1.36237	0.479471	0.629539	0.547579	0.417936	0.879413	0.825078	0.386181	0.634238	0.691264	0.495394	1.14038	0.174234	0.462538
chr15	623805	625080	1.88679	1.59664	5.59846	3.92476	5.65158	1.53846	0.750751	4.64135	1.82266	8.24742	3.39002	0.888889	0.584795	2.46212	1.19048	0.915751	0.225225	1.5873	11.6125	1.28205	chr15	623025	625025	HIRA	10.1225	9.42179	7.74975	5.8929	5.37626	5.95825	6.98151	4.46766	5.83796	5.59706	4.37778	6.59894	3.87566	6.02841	5.46207	4.27499	4.75662	5.89033	5.18604	7.70376	-0.128372	0.58963
chr15	652216	657444	0.407489	0.457726	0.194938	0.190603	1.19998	0.547466	0.190746	1.22413	0.805207	0.256786	0.29991	0.19987	0.285099	0.262278	0.159093	0.128752	0.246414	0.109159	1.04857	2.66904	chr15	651415	653415	MRPL40	136.508	66.8569	54.9618	90.8634	125.793	84.2269	127.194	86.6009	37.5642	34.8788	101.678	47.1652	58.9616	101.505	59.4971	88.2031	46.9092	39.2567	65.23	14.1562	-0.233348	0.322112
chr15	652216	657444	0.407489	0.457726	0.194938	0.190603	1.19998	0.547466	0.190746	1.22413	0.805207	0.256786	0.29991	0.19987	0.285099	0.262278	0.159093	0.128752	0.246414	0.109159	1.04857	2.66904	chr15	655450	657450	UFD1L	53.5984	30.5875	18.6451	29.3206	16.1883	16.2261	17.9158	20.4345	16.818	15.5724	13.7363	16.133	12.0624	29.6706	21.5281	20.7199	15.503	17.3195	19.4832	16.8365	-0.1164	0.625052
chr15	652216	657444	0.407489	0.457726	0.194938	0.190603	1.19998	0.547466	0.190746	1.22413	0.805207	0.256786	0.29991	0.19987	0.285099	0.262278	0.159093	0.128752	0.246414	0.109159	1.04857	2.66904	chr15	654049	656049	C22orf39	9.00481	23.1383	18.1222	18.3065	12.7885	12.3832	18.7599	7.96585	9.52754	12.6224	9.07054	11.5955	20.3128	27.7904	12.5166	10.3519	4.69862	15.9586	14.7289	3.04479	-0.460257	0.0411477
chr15	662997	664455	0	0.878557	0	0.0824176	0	0	0.17094	0	0.109649	0.045977	0	0.347042	0	0	0	0	0.490196	0	0.0400641	0	chr15	662050	664050	CDC45	0.205997	0.669587	8.05095	0.429554	0.825426	0.345033	10.6834	1.85055	2.21068	1.91134	0.330507	1.729	0.33332	0.271264	0.163145	0.189777	0.672521	0.602344	0.575604	0.597775	0.017023	0.943213
chr15	702285	703697	0.593672	0.65499	3.75438	1.0045	0.759862	0.0822368	1.16203	3.61958	6.82114	2.08495	0.652713	2.35145	2.22144	1.50772	0.696629	1.02801	1.6201	2.33148	1.68916	1.88987	chr15	701406	703406	ENSGALG00000023813	3.20746	0.451898	7.3938	3.53164	24.1607	3.4533	2.79982	3.30005	3.59164	4.84558	24.8166	2.89251	0.287075	1.58365	0.189992	0.628836	2.76548	3.18792	5.47823	4.19312	-0.149974	0.527973
chr15	1299616	1301581	0.614696	0.776802	0.0319203	0.0862813	0.0208513	0.505876	0.112747	0.174747	0.00708617	0.0151791	0.0276061	0.0596003	0.187869	0.193962	0.0224226	0.286842	0.123483	0.0249419	0.0246548	0	chr15	1298824	1300824	RANBP1	9.13273	19.8001	22.6654	10.9692	14.2446	12.4034	30.5727	17.2787	28.5211	17.3164	12.9296	17.2814	16.7754	13.2389	32.8594	11.9038	15.6002	11.9351	7.50697	13.9035	-0.195862	0.407908
chr15	1299616	1301581	0.614696	0.776802	0.0319203	0.0862813	0.0208513	0.505876	0.112747	0.174747	0.00708617	0.0151791	0.0276061	0.0596003	0.187869	0.193962	0.0224226	0.286842	0.123483	0.0249419	0.0246548	0	chr15	1298824	1300824	SNORA77	1792.84	2350.22	41501.4	5119.72	8953.74	12598.4	1913.58	17975.7	34069.1	51935.4	15912.5	17390.8	13974.6	16220.7	142495	53221.1	23533.3	16549	11803.6	4239.45	-0.274091	0.242238
chr15	1309995	1312062	2.55351	6.69628	4.6159	0.954863	0.906957	3.16223	0.633599	4.04556	2.61246	6.12434	1.64339	10.3955	1.22115	2.8956	1.09615	0.405766	2.37733	4.24865	0.542275	5.75702	chr15	1308894	1310894	ZDHHC8	5.91634	5.1273	3.50182	6.51098	4.84431	5.8034	4.55864	8.77205	5.54569	7.25895	5.96654	8.86659	3.16077	7.27572	5.8414	2.90191	2.8203	9.26992	7.06061	11.9974	0.507189	0.0224574
chr15	1432752	1433958	0.0686637	0	0.0679348	0.0873846	0.0794296	0	0.19546	0.688705	0	0.0206782	0	0.0212766	0	0.160209	0	0.0839485	0.0434972	0.0639386	0.0280484	0	chr15	1431823	1433823	ENSGALG00000023793	5.20176	1.49029	0.611175	1.67648	10.4415	1.37731	3.38144	2.93093	1.08668	2.36994	8.18113	1.6852	0.93793	2.33525	2.57336	1.23529	1.52937	1.00674	3.74452	3.30295	0.0353504	0.882376
chr15	1432752	1433958	0.0686637	0	0.0679348	0.0873846	0.0794296	0	0.19546	0.688705	0	0.0206782	0	0.0212766	0	0.160209	0	0.0839485	0.0434972	0.0639386	0.0280484	0	chr15	1431823	1433823	GOLGA3	65.1568	10.9277	6.23727	26.4041	8.6882	10.7231	14.2572	7.9652	9.87749	9.49905	10.0439	8.24026	4.86716	15.0317	11.0103	10.4509	7.34508	9.74397	7.13515	10.9021	-0.00829865	0.9723
chr15	1432752	1433958	0.0686637	0	0.0679348	0.0873846	0.0794296	0	0.19546	0.688705	0	0.0206782	0	0.0212766	0	0.160209	0	0.0839485	0.0434972	0.0639386	0.0280484	0	chr15	1431823	1433823	CHFR	5.81843	11.847	7.95043	5.74902	6.07045	5.31214	10.1998	6.55539	8.9682	7.02673	5.66132	6.29767	5.54813	7.11145	8.19267	3.63148	5.08627	6.68105	4.3995	10.2375	-0.0332847	0.889208
chr15	2566785	2567914	8.90417	5.77382	3.03001	0.551516	0.786926	0.753296	2.14677	1.75141	3.65199	0.818111	0.649465	5.1148	0.491935	1.45488	2.4324	0.431745	7.11144	1.09139	0.716487	15.7017	chr15	2565696	2567696	ENSGALG00000002336	10.6208	3.53552	6.053	3.3468	4.11979	3.21261	3.62744	2.89615	4.86232	5.02318	4.25086	5.65405	1.8687	3.99813	3.02514	2.74709	2.82185	4.4679	3.59298	7.27944	0.624999	0.00321407
chr15	3493993	3495030	2.06282	0.16398	0.377997	0.394281	0.734329	0.0830565	0.558469	4.90843	0.418639	0	0.583393	0.489591	0.455406	0.866572	2.13484	0.608457	0.104453	0.473771	0.528924	0.947186	chr15	3492677	3494677	TMEM132D	0.0328699	0.228986	4.20709	0.0147394	13.827	0.757318	2.37067	0.786788	1.10192	2.82788	6.56186	0.387152	0.30545	0.0623464	2.07789	0.367871	1.39471	0.201164	5.49692	0.414446	-0.0956538	0.688306
chr15	4502532	4508764	3.09837	5.69631	10.7391	6.02747	4.58586	5.57901	2.78252	6.17635	6.06795	3.38928	4.20839	7.58122	5.34833	5.17081	7.17095	1.30719	9.70324	2.96611	6.06	7.28088	chr15	4506302	4508302	SCARB1	2.21072	13.0814	1.17289	4.72446	10.0568	4.18676	2.63232	40.4365	5.98984	4.87671	7.81098	5.68958	1.63078	2.94349	0.863909	5.67226	1.95205	22.5204	23.0423	24.1813	-0.0286618	0.904523
chr15	4908020	4908604	1.79487	1.99531	0.275482	1.20021	2.3382	2.05882	1.1859	1.64609	1.06667	0.827647	2.13675	1.58037	1.37131	0.929487	0.85034	1.08404	1.20192	0.773196	1.1913	0.462181	chr15	4906893	4908893	ATP6V0A2	0.37683	0.730444	0.378407	0.3244	0.54478	0.481494	0.337669	0.652302	0.94216	0.254519	0.780012	0.399434	0.283545	0.768203	0.578655	0.374878	0.284146	0.498364	0.505119	1.50048	-0.118836	0.617777
chr15	4908020	4908604	1.79487	1.99531	0.275482	1.20021	2.3382	2.05882	1.1859	1.64609	1.06667	0.827647	2.13675	1.58037	1.37131	0.929487	0.85034	1.08404	1.20192	0.773196	1.1913	0.462181	chr15	4906893	4908893	ATP6V0A2,GTF2H3,TCTN2	25.9672	33.1428	15.1345	21.8321	26.0185	21.4926	27.49	26.0137	23.7527	15.2164	22.8461	16.5194	19.9033	37.7246	27.7062	21.3823	14.6082	19.4717	16.8706	29.0592	0.175372	0.459575
chr15	4954080	4956704	0.0473485	0.843343	0.0622471	0.0597372	0.107427	1.07605	0.0718065	0.220026	0.0445633	0.0264971	0	0	2.28175	0.0768049	0.109469	0	0	0	0.0777001	0	chr15	4954024	4956024	RILPL1	185.679	5.71403	3.86234	59.0786	16.9878	13.9294	14.7968	21.4369	7.88163	12.7309	16.6747	9.23838	6.83465	102.849	13.1391	3.32124	12.7771	20.5246	28.0193	24.3894	-0.175149	0.460155
chr15	4978647	4979726	0	2.33333	0	0	0	3.94737	0.144928	0.679206	3.7037	4.99081	0	0.3125	4.6875	5.71429	0.793651	0	5.88235	2.8169	0.0256345	0.0775194	chr15	4977290	4979290	RILPL2	3.25782	30.9858	31.7723	7.04297	4.01622	6.13	11.9131	4.35561	49.793	6.49921	4.61229	9.68937	25.8533	5.6949	8.18057	5.3979	10.3456	9.22375	6.97883	6.15994	0.234229	0.320235
chr15	4978647	4979726	0	2.33333	0	0	0	3.94737	0.144928	0.679206	3.7037	4.99081	0	0.3125	4.6875	5.71429	0.793651	0	5.88235	2.8169	0.0256345	0.0775194	chr15	4977290	4979290	SETD8	30.2699	9.89722	8.5633	13.4263	20.6042	4.19494	12.3543	3.95943	7.71395	3.86128	17.6824	5.24483	7.80791	11.4276	11.4842	6.02323	4.95215	4.90326	6.13868	3.53524	-0.360396	0.118535
chr15	5226097	5226713	0.740741	0.253623	0	0	0	0	0	0	0	0	0	0	0	0	0	0	0	2.08333	0.21645	0.277778	chr15	5224344	5226344	VPS37B	39.9121	20.6838	5.53689	15.8838	25.8346	8.59503	9.43666	12.4942	8.68561	9.92598	22.8692	11.7867	11.0872	9.59791	10.4134	6.59932	13.1269	8.98996	8.84663	9.19289	0.131144	0.581551
chr15	5263241	5263748	0.0888715	1.03876	1.81818	0.0722193	0.0744173	0.0904159	0.0820345	0	0	0.0527582	1.00313	0.0372616	0.0197785	0.0363636	0	0.0540541	0.0701262	0.113453	0.0378988	0.0238095	chr15	5262074	5264074	DENR	34.25	17.9577	3.98045	20.3281	10.3605	8.02912	16.6865	7.12812	10.0341	6.2143	11.802	6.44917	5.28606	18.4209	11.9476	5.36572	3.01046	6.71291	6.23734	8.88664	-0.0512699	0.83003
chr15	5269824	5270578	0	0	0	0.350877	0	0	0	0	0	0	0.3861	0	0	0	0	0	0.666667	0	0	0	chr15	5268288	5270288	GPN3	15.172	12.1196	5.4695	13.1757	7.74756	6.28462	8.66321	6.7491	8.10455	4.53225	6.71457	6.13342	6.00503	14.6911	8.86642	5.59294	5.96222	5.48247	6.58526	7.14917	-0.0112893	0.962324
chr15	5280827	5281273	0	0.185185	0	0.131083	0.213675	0	0	0	0	0.0411523	0	0	0	0	0	0.240385	0	0	0	0	chr15	5279003	5281003	ANAPC7	10.7192	13.3124	6.79932	6.511	10.7714	6.70492	12.3014	10.2444	15.7434	7.81826	9.32516	7.42611	6.76019	9.68828	13.4616	8.09333	8.55649	6.59194	7.81149	9.17423	0.0657516	0.782998
chr15	5424893	5425544	0.20206	0.0218103	4.41043	0.0556948	0.0793651	1.24603	0.854701	1.68495	1.51208	1.1078	1.33333	0.113439	1.06227	0.102273	0	0.0473485	1.5493	0.714286	0.0238894	0.245744	chr15	5422955	5424955	P2RX4	0.983504	34.5656	4.13624	6.09346	2.09555	8.06074	5.64788	6.15986	17.3321	4.64762	1.95327	14.6644	4.34178	5.17394	28.7504	19.781	5.304	7.8791	5.22033	7.95342	-0.298651	0.200883
chr15	5424893	5425544	0.20206	0.0218103	4.41043	0.0556948	0.0793651	1.24603	0.854701	1.68495	1.51208	1.1078	1.33333	0.113439	1.06227	0.102273	0	0.0473485	1.5493	0.714286	0.0238894	0.245744	chr15	5422955	5424955	CAMKK2	1.35195	46.6957	12.1346	6.57021	107.455	8.58278	6.38997	17.322	18.516	4.80164	80.6591	9.68538	3.43108	4.0068	30.5189	8.79489	8.36234	14.4607	7.40826	8.65618	-0.0932024	0.695924
chr15	5443251	5445103	31.4093	4.20561	39.3551	17.4556	23.1843	27.4527	26.1151	21.1076	9.44732	28.6731	22.4587	24.2887	25.1761	33.5891	42.8568	21.5895	39.5761	32.372	49.464	33.5202	chr15	5444303	5446303	ANAPC5	1.96302	14.5899	2.83702	2.16987	4.24078	1.62344	3.64752	2.57216	3.32677	1.1058	3.48927	2.14481	2.72751	1.42672	4.78068	3.04449	1.71369	1.74005	1.68448	2.72658	-0.534087	0.0152795
chr15	5457630	5460956	0.0325309	0.210077	0.636245	0.277101	0.295528	0.164277	0.351274	1.4049	0.03663	0.189794	0.08913	0.558036	0.186567	0.0187617	0.192149	0.183195	0.839844	0.0231941	0.356118	0.419895	chr15	5458082	5460082	RNF34	36.7615	12.929	9.52464	20.7625	10.8687	15.0773	9.29205	12.8753	14.676	8.1962	8.44911	10.3685	11.942	9.73088	16.9611	9.44328	15.8201	17.5638	11.9387	18.0187	-0.161498	0.496362
chr15	5457630	5460956	0.0325309	0.210077	0.636245	0.277101	0.295528	0.164277	0.351274	1.4049	0.03663	0.189794	0.08913	0.558036	0.186567	0.0187617	0.192149	0.183195	0.839844	0.0231941	0.356118	0.419895	chr15	5458082	5460082	KDM2B	3.87836	3.55143	4.54755	4.10944	9.48749	3.89327	12.3367	2.848	8.6124	6.56782	8.50543	4.54196	3.04669	4.18142	4.21945	1.29437	3.37717	3.8287	3.74455	4.95752	-0.191006	0.419856
chr15	5569184	5575279	1.74599	2.76138	0.285927	3.11203	2.08431	4.62195	0.409253	0.842402	0.498843	0.893469	4.52538	8.06102	0.655553	0.37824	0.136361	7.10557	0.922619	4.92917	1.96369	0.55131	chr15	5570637	5572637	ORAI1	5.34332	3.56402	7.75803	4.09333	3.81878	3.56711	3.26177	6.76804	5.55114	1.99932	3.51773	3.46288	1.02214	13.2094	3.67314	0.784695	5.2684	5.2132	3.51945	4.45376	-0.362011	0.116773
chr15	5569184	5575279	1.74599	2.76138	0.285927	3.11203	2.08431	4.62195	0.409253	0.842402	0.498843	0.893469	4.52538	8.06102	0.655553	0.37824	0.136361	7.10557	0.922619	4.92917	1.96369	0.55131	chr15	5570637	5572637	MORN3	0	0.209616	0.553133	0.867135	4.04531	0.17658	0.712465	0.548752	0.486946	0.18387	3.68498	0.198326	0.145693	11.5563	7.76462	0	1.19909	0.49317	1.65975	0.655714	-0.275519	0.239694
chr15	5684838	5687346	43.7827	6.88537	42.4473	42.084	43.6619	39.3365	42.8668	45.1396	44.282	38.3363	43.3636	40.5576	35.729	52.1015	38.8813	31.2548	43.2386	44.864	42.4708	42.8406	chr15	5684961	5686961	PSMD9	30.1054	31.2734	23.3986	23.8851	20.6965	19.2728	21.8093	21.32	21.2848	9.30147	16.0146	14.3489	27.0676	21.5573	23.5062	19.7595	30.0477	15.4594	17.5329	21.7169	-0.330436	0.154754
chr15	5809198	5809856	7.85714	5.843	11.0714	9.30256	11.1746	14.0714	8.38608	14.1667	12.9592	18.2372	14.3167	15.3571	8.10127	12.8571	15.6863	5.79365	50	0	13.2435	16.8776	chr15	5808003	5810003	CLIP1	20.4088	3.39591	2.71984	4.67927	3.02774	3.46175	2.81724	7.00371	4.78144	6.6189	3.25145	4.35342	3.39257	8.86308	5.20232	1.54311	5.27628	4.1942	8.61634	12.8132	0.0464138	0.845935
chr15	5809198	5809856	7.85714	5.843	11.0714	9.30256	11.1746	14.0714	8.38608	14.1667	12.9592	18.2372	14.3167	15.3571	8.10127	12.8571	15.6863	5.79365	50	0	13.2435	16.8776	chr15	5808003	5810003	CLIP1,ENSGALG00000025856	85.0781	14.5972	6.69732	30.8758	10.8565	12.3607	7.70278	12.6748	12.0441	9.0135	11.311	11.165	10.5422	66.7482	11.3222	5.13468	11.22	13.3077	19.0955	19.0716	-0.121176	0.610819
chr15	6037495	6039229	18.7991	25.3099	28.5755	11.1109	13.4163	22.3775	19.1889	23.8032	21.254	18.9501	16.3156	27.515	21.6148	22.2199	10.9455	21.0926	28.448	20.1394	13.5981	23.5908	chr15	6035829	6037829	CUX2	0.155615	2.78799	0.0142814	0.145466	3.39208	0.240994	0.637524	0.110018	0.0439288	0.381091	2.67896	0.121387	1.52167	1.51505	1.05623	0.529073	0.251511	0.0774892	2.5588	0.0963129	-0.382991	0.0955629
chr15	6089365	6103784	60.5539	50.6856	42.8802	60.28	59.3268	56.4049	55.5139	64.1743	37.372	47.9242	59.7676	58.3402	57.2345	47.4112	66.6824	49.2603	43.2874	53.7647	68.5505	45.3963	chr15	6090869	6092869	FAM109A	0	1.83548	0.914954	1.15459	0.56911	1.36896	4.53206	1.46316	1.12951	1.2949	0.224803	3.91758	3.72956	0.701531	4.9538	4.4312	2.78067	1.49358	0.512968	0.429061	0.0966667	0.685167
chr15	6089365	6103784	60.5539	50.6856	42.8802	60.28	59.3268	56.4049	55.5139	64.1743	37.372	47.9242	59.7676	58.3402	57.2345	47.4112	66.6824	49.2603	43.2874	53.7647	68.5505	45.3963	chr15	6095403	6097403	SH2B3	2.75595	7.32792	18.4171	8.36509	2.49494	5.34162	8.55292	8.88975	17.701	8.2358	3.39875	9.13804	10.5863	18.8823	3.75091	4.27788	36.3955	11.7306	7.13939	3.35508	-0.575268	0.00796059
chr15	6286048	6288472	0	0	0	0	0	0	0	0	0.555556	0	0	0	0	0	0	0	0	0	0	1.38889	chr15	6285965	6287965	TRAFD1	4.3152	43.8603	22.0184	7.00146	13.614	6.67218	10.0915	19.7145	29.9925	8.44325	10.8074	11.632	8.19386	12.2665	27.3922	13.1759	9.43048	12.2405	9.55393	10.8281	0.0562777	0.813695
chr15	6380109	6380759	0.0604961	0	0.173611	0.0472506	0.0448029	0.1221	0.0578704	0	0	0.102319	0	0.0793651	0.137174	0.0187688	0	0.157828	0.308642	0	0.101145	0.145716	chr15	6378513	6380513	PTPN11	23.7097	21.7846	8.54964	12.1516	27.849	10.2442	14.65	9.10354	9.4576	10.4849	23.6204	10.0413	9.87649	10.9048	13.1928	10.2826	8.10958	9.126	7.54179	10.3721	-0.395701	0.0841699
chr15	6514413	6515335	0	0	0	0	0	0	0.0561167	0	1.2987	0.0618812	0	0	0	0.122893	0	0.0694445	0.0710227	0	0.0869848	0.0304599	chr15	6512892	6514892	ISCU	76.2157	55.1659	13.8678	30.5612	22.297	18.3835	21.1771	12.319	13.8107	23.019	15.4207	18.6669	40.7139	152.583	13.4118	15.454	32.6234	14.2922	16.9008	12.8326	-0.0620726	0.794885
chr15	6559591	6566943	37.5525	31.4191	35.6797	34.2408	47.2481	12.1224	42.7351	45.5284	38.2412	36.1516	37.8109	27.3327	37.1966	32.8991	29.2951	37.1048	35.329	34.0121	37.2057	38.1658	chr15	6566846	6568846	SSH1	2.90542	6.05417	4.25231	5.26984	4.10789	8.96797	6.31021	7.32931	10.9423	7.19173	3.69939	6.48127	3.99449	13.6405	6.24179	4.29457	11.1894	4.96833	4.86776	4.03819	-0.279124	0.23335
chr15	6630979	6631648	0	0.961538	1.17647	0	0	0	0	0.925926	0.595238	0	0.653595	0	0	0	1.47059	0	0	0	0	0	chr15	6629169	6631169	USP30	5.40736	6.13109	2.46296	3.59967	3.97043	2.67043	2.37361	2.33884	4.33274	2.31484	4.47407	2.75015	2.73085	4.57364	3.64676	2.48492	2.38637	2.42968	3.276	5.12957	0.159252	0.50245
chr15	6630979	6631648	0	0.961538	1.17647	0	0	0	0	0.925926	0.595238	0	0.653595	0	0	0	1.47059	0	0	0	0	0	chr15	6629169	6631169	ALKBH2	2.99968	6.89299	3.52063	3.64879	4.34416	4.97047	6.97139	4.4252	5.63968	3.76341	3.86745	3.67347	2.92727	7.51042	6.46304	3.2485	2.90529	4.09085	3.26086	4.32317	0.328925	0.156763
chr15	6644670	6645957	0.111274	0.534759	0	0.14776	1.38254	0	0.166113	0	0.118483	0.082479	0.153055	0.0266454	0.0775342	0.0445736	0.417022	0.0143349	0.0473122	1.04167	0.0694003	0	chr15	6643126	6645126	UNG	3.6974	14.3705	19.6954	5.20892	3.64839	4.05109	24.5456	6.75818	8.0185	5.21714	5.80738	5.81752	3.77207	4.26775	5.79222	3.32962	3.59005	4.93867	4.79777	5.09284	-0.0641508	0.788164
chr15	6793639	6794355	0	0	0.213675	0	0	0	0	0	0	0.0343407	0	0.243447	1.44928	0.0503018	0	0	0	0	0	0.0736106	chr15	6791994	6793994	ENSGALG00000013848	2.09582	17.2769	10.7518	4.71546	12.6234	6.64717	23.0308	16.8158	5.54697	12.2994	12.6123	6.42827	6.16165	10.3954	14.0211	3.81642	7.43598	7.2458	9.29291	4.90964	-0.182217	0.441954
chr15	6943988	6945175	21.9136	5.52733	28.2609	21.955	14.4654	21.0938	16.7016	14.5062	11.3667	18.665	16.1258	14.4872	20	37.5	23.7179	18.75	23.2143	25.7576	22.9562	25.2174	chr15	6942531	6944531	KIAA1671	4.27273	33.337	26.4122	8.16184	9.723	11.5042	10.017	9.93013	9.64119	12.8599	10.0511	11.2302	13.471	11.9828	13.0668	1.68897	17.0839	14.207	9.12086	6.91712	-0.155369	0.51306
chr15	7176451	7181979	33.7809	35.2285	37.7665	35.2245	36.1038	33.6303	34.8171	37.5088	52.1608	40.3504	39.2447	34.9066	36.5383	33.6049	34.7345	35.9844	42.7923	34.5265	36.7009	34.9797	chr15	7174717	7176717	CRYBA4	0	0	0	0	0	0	0	0	0	0	0	0	0	0	0	0	0	0	2.59017	0	-0.0180926	0.939651
chr15	7176451	7181979	33.7809	35.2285	37.7665	35.2245	36.1038	33.6303	34.8171	37.5088	52.1608	40.3504	39.2447	34.9066	36.5383	33.6049	34.7345	35.9844	42.7923	34.5265	36.7009	34.9797	chr15	7174717	7176717	CRYBB1	0	0.284177	0	0	1.02045	0.200195	0.111861	0	0	0	1.75253	0.198725	0	0	0	0	0.164962	0.144037	222.114	0	-0.0176946	0.940976
chr15	7860983	7866524	1.86824	3.60554	6.02082	4.83496	4.43385	0.274952	1.1243	2.32442	3.76922	2.34096	3.85299	6.77336	1.59199	2.18655	0.893998	2.98961	7.12918	2.33437	7.16308	4.69427	chr15	7861778	7863778	GSC2	0	0	0	0	0	0	0.169501	0	0	0	0	0	0	0	0	0	0	0	0	0	-0.268456	0.252445
chr15	7860983	7866524	1.86824	3.60554	6.02082	4.83496	4.43385	0.274952	1.1243	2.32442	3.76922	2.34096	3.85299	6.77336	1.59199	2.18655	0.893998	2.98961	7.12918	2.33437	7.16308	4.69427	chr15	7864091	7866091	DGCR14	8.5476	7.33363	6.97964	6.8342	4.82813	4.85193	8.57073	7.8252	8.20016	4.20866	6.00102	4.77885	4.28893	8.33407	5.96628	4.82316	7.87726	5.12599	5.23924	4.65835	-0.0500034	0.834173
chr15	7957536	7958206	31.3456	8.33904	15.256	34.9349	34.9317	49.1308	34.1637	7.17262	6.27395	30.2131	34.5985	25.5126	20.9416	31.0942	25.2022	26.7531	12.58	15.4744	32.5194	7.14689	chr15	7956243	7958243	VPREB3	0	0	0.454798	0	0	0	0	0.200623	0.387056	0	0	0	0	0	0	0.736252	0.756704	0	0	0	-0.373512	0.104765
chr15	7980435	7981950	0.97199	13.0543	0	0.607997	24.8025	16.9884	1.09578	0.892857	1.51515	0.774962	24.3421	9.66958	0	4.59596	0	10.5555	0.512821	0.67527	2.7407	0.686869	chr15	7981465	7983465	MMP11	0.456213	1.26827	0.576007	0.827925	0.116331	1.33368	0.375068	0.636436	0.470652	2.14271	0.0659983	0.959199	0.518022	3.89522	0.129554	0.448457	2.07165	1.50303	0.577786	1.04138	-0.191412	0.41885
chr15	7980435	7981950	0.97199	13.0543	0	0.607997	24.8025	16.9884	1.09578	0.892857	1.51515	0.774962	24.3421	9.66958	0	4.59596	0	10.5555	0.512821	0.67527	2.7407	0.686869	chr15	7981465	7983465	MMP11	0.277529	0.968929	0.077381	0.333006	0.398128	0.292257	0.27595	0.146601	0.177439	0.272079	0.522601	0.537718	0.417769	1.24267	0.330269	0.644396	0.428109	0.32133	0.242188	0.547387	0.290162	0.214605
chr15	7998114	7998861	0	0	0	0	0	0.884956	0	0	0.0841751	0	0.78125	0	0	0	0	0	0	1.8018	0.0598086	0.43956	chr15	7996508	7998508	SMARCB1	12.5047	18.3963	11.28	10.8668	13.5005	13.2297	25.2028	12.5401	14.9399	16.3652	13.126	14.2314	11.0054	20.1785	16.2976	12.4838	11.2117	10.8559	10.0481	8.83667	-0.260202	0.267882
chr15	8110283	8111496	2.11601	0.481726	4.69136	3.69047	6.12528	9.28571	2.36703	9.69148	3.27991	0.288984	7.36215	2.76903	4.46951	0.141457	0	1.19408	5.36511	1.75	1.52948	6.32888	chr15	8108765	8110765	GSTT1	15.8942	125.254	5.05471	15.7704	0.400871	2.29027	1.32252	14.9359	5.27236	4.14488	0.29222	15.3428	0.435553	141.599	8.25379	1.2941	10.4484	28.5076	9.26761	4.94166	-0.412498	0.0706951
chr15	8257053	8262783	29.0266	30.0906	39.1193	24.1843	26.6643	19.1183	28.1791	30.7051	33.0984	36.0943	15.6964	29.7834	29.3543	29.5398	19.5161	33.0356	33.9861	16.8665	26.5199	39.416	chr15	8259392	8261392	CRKL	25.7923	3.93906	3.76773	5.30372	3.85721	2.94981	3.92971	4.15386	3.87931	5.34665	3.38598	5.95126	1.64577	4.00235	3.1468	2.61477	2.81748	4.58596	3.74674	10.3832	0.13643	0.566279
chr15	8433993	8434775	0	0	0	0.103028	0.132979	0	0	0.177305	0.0880282	0	0	0	0	0	0	0.0537057	0	0	0.0208834	0	chr15	8432402	8434402	GUCD1	44.7173	6.1332	3.79802	17.5729	4.63488	14.5813	4.81733	7.86679	7.07281	4.38273	3.64318	5.01976	11.0747	7.73931	29.5906	7.08739	4.81179	6.31275	6.31668	9.08495	-0.0954701	0.688876
chr15	8433993	8434775	0	0	0	0.103028	0.132979	0	0	0.177305	0.0880282	0	0	0	0	0	0	0.0537057	0	0	0.0208834	0	chr15	8432402	8434402	UPB1	0.219671	0.190775	0.683764	0.145433	0.257702	0.0586403	0.0867717	0.18634	2.01822	0.142376	0.167106	0.103275	0.158156	0.372443	0.97009	0.153386	0.257264	0.124339	0.26516	0.08806	0.178999	0.450193
chr15	8433993	8434775	0	0	0	0.103028	0.132979	0	0	0.177305	0.0880282	0	0	0	0	0	0	0.0537057	0	0	0.0208834	0	chr15	8432402	8434402	ENSGALG00000006642,UPB1	3.54052	228.1	10.9476	3.51973	7.30707	2.81633	2.8037	3.99124	41.63	3.88399	6.71421	8.73722	139.084	8.66741	23.6963	2.36204	7.59501	3.84253	7.69647	4.44449	-0.157256	0.50789
chr15	8571478	8572783	0.0760649	0.0502371	0.530805	0.125425	0.300752	1.29411	0.202373	0.317164	0.23819	0.234644	0.194579	0.282575	0.406302	1.35831	0.0318979	0.0501253	0.682895	1.50227	0.634351	0.190977	chr15	8571858	8573858	BCR	4.92215	4.29637	6.37421	7.68856	26.0427	7.31769	8.30908	7.88199	10.8361	12.5791	25.4646	11.2902	5.65458	6.88591	20.9723	4.74868	9.96831	10.3728	7.92762	12.7951	-0.181102	0.444798
chr15	9045566	9046641	2.85717	1.09514	2.45945	1.42424	3.60541	0	1.49123	1.19048	4.41595	1.08095	1.04532	3.6441	4.4598	1.38813	1.39847	0.531242	3.89776	7.63683	5.0041	1.66976	chr15	9043928	9045928	PIK3IP1	155.029	17.258	20.8169	73.4441	26.1056	155.023	24.7026	46.0467	59.1191	12.5573	26.4746	22.4646	18.3408	87.7685	122.356	123.297	42.8046	50.1442	48.4254	46.6499	-0.282653	0.227245
chr15	9083274	9084818	0.613748	4.41347	0.205761	1.33108	1.37072	0.877193	0.547009	0.37594	7.6295	7.89216	5.33486	4.7235	0.776583	0	0	0.58309	0	1.11111	0.195683	0.66305	chr15	9082505	9084505	RNF185	8.5721	28.2798	3.54059	6.8868	11.1473	7.69326	10.0338	10.1892	8.15508	5.84196	10.2914	7.5035	10.7354	8.62878	13.5593	21.1974	6.60497	7.24671	7.55417	7.39978	0.0612775	0.797459
chr15	9097398	9100792	4.70127	4.31849	10.496	6.83406	6.55875	5.88307	9.72252	13.4244	5.26799	6.90726	5.9329	7.95618	4.01578	6.52904	3.84613	2.60327	7.40394	7.49467	6.14329	11.7004	chr15	9098578	9100578	C12orf43,HNF1A	2.64653	77.638	2.75318	3.32147	7.07179	8.25494	2.6844	3.25325	3.55678	2.8665	2.31286	15.5793	13.1572	1.80551	4.48965	10.0415	2.2418	2.01321	3.15039	5.02002	-0.27683	0.237374
chr15	9097398	9100792	4.70127	4.31849	10.496	6.83406	6.55875	5.88307	9.72252	13.4244	5.26799	6.90726	5.9329	7.95618	4.01578	6.52904	3.84613	2.60327	7.40394	7.49467	6.14329	11.7004	chr15	9098578	9100578	HNF1A	0.695308	23.9241	0.381037	0.516703	0.676024	2.45656	0.510038	0.570118	0.732478	0.430593	0.61881	2.69921	5.94072	0.568487	1.10474	5.19471	0.24975	0.392341	0.410867	0.714352	-0.354399	0.125244
chr15	9125462	9127612	2.75487	5.36671	13.7742	4.19524	2.56294	0.632857	2.811	4.99641	3.39658	4.60241	4.29159	3.35055	4.6812	4.29147	3.07761	2.23682	10.9811	4.58634	7.69745	9.10776	chr15	9124660	9126660	SPPL3	8.63718	13.0276	5.14518	5.82811	12.7662	7.49372	7.33544	10.3451	9.16907	9.63753	10.5398	7.84351	5.03773	7.09647	6.84342	8.87622	8.31488	9.48491	8.52472	11.0351	-0.135031	0.570305
chr15	9185141	9186275	0	0.410509	0	0.128215	0.284091	0.189394	0.130208	0	0	0.0291843	0	0.51462	0	0.0459559	0	0.0919118	0	0	0.0371624	0.0381971	chr15	9183889	9185889	UNC119B	3.90894	10.1404	20.896	6.98181	5.51772	6.79585	10.3972	10.2163	18.3102	7.55584	6.40409	8.48979	7.63594	7.12733	11.0011	11.644	17.1106	11.3596	7.40675	11.4685	-0.248321	0.29112
chr15	9191868	9192656	2.53319	3.21296	0.761263	2.99242	0.730732	2.34793	1.77036	0.505051	7.27941	1.43348	1.5253	2.93937	1.05584	2.00885	3.79146	6.7234	1.32957	2.24893	5.3233	2.44399	chr15	9190951	9192951	MLEC	16.3377	34.7486	38.8445	24.4942	15.0239	13.0887	25.1041	16.939	25.7571	20.522	12.3661	28.9897	16.3726	10.0669	16.1109	11.7701	16.3882	16.362	11.626	12.6445	-0.0519891	0.82768
chr15	9255547	9257344	15.9301	8.56192	35.0549	14.8215	27.7702	22.216	17.3525	12.8333	10.8984	28.343	26.4632	16.7582	11.6755	18.8737	17.7143	17.3022	32.8349	15.0352	17.9512	18.3272	chr15	9254505	9256505	POP5	5.39646	6.82009	1.60331	4.34396	4.14015	2.91063	5.19641	0.951217	2.61881	1.14293	3.96435	1.38437	2.52682	3.34282	2.1243	2.53868	1.02151	2.7206	1.61911	1.13397	-0.339511	0.14306
chr15	9255547	9257344	15.9301	8.56192	35.0549	14.8215	27.7702	22.216	17.3525	12.8333	10.8984	28.343	26.4632	16.7582	11.6755	18.8737	17.7143	17.3022	32.8349	15.0352	17.9512	18.3272	chr15	9254505	9256505	RNF10	86.8539	29.7569	31.2134	27.7653	22.9534	19.7813	16.1016	11.7501	13.0583	19.6396	20.5848	18.4203	14.1293	40.512	15.313	18.8463	14.8313	15.321	19.1286	19.5917	-0.019845	0.933818
chr15	9274364	9282276	4.56403	1.43685	3.96502	3.41892	1.86331	0.739358	1.44011	2.8627	3.31912	1.48399	1.65102	5.76674	2.31166	2.28322	2.50354	1.6991	3.18456	1.09651	3.1498	3.37016	chr15	9274829	9276829	COQ5	10.6304	15.8359	7.41813	9.45499	8.8144	6.72423	14.86	8.1045	12.5525	11.1162	8.60418	10.5747	5.65929	29.1149	11.6655	21.2554	5.82113	6.61498	9.67733	8.51956	-0.138645	0.559933
chr15	9274364	9282276	4.56403	1.43685	3.96502	3.41892	1.86331	0.739358	1.44011	2.8627	3.31912	1.48399	1.65102	5.76674	2.31166	2.28322	2.50354	1.6991	3.18456	1.09651	3.1498	3.37016	chr15	9273462	9275462	ENSGALG00000007147	0	0	0.330032	0.287986	0.519127	0.399717	0.344198	0	0	0.857625	0	0.430248	0	0	0	2.50515	0.176852	0	0	0	-0.190077	0.422164
chr15	9274364	9282276	4.56403	1.43685	3.96502	3.41892	1.86331	0.739358	1.44011	2.8627	3.31912	1.48399	1.65102	5.76674	2.31166	2.28322	2.50354	1.6991	3.18456	1.09651	3.1498	3.37016	chr15	9274829	9276829	ENSGALG00000007153	15.2037	75.3127	45.901	44.3859	50.8367	40.2671	136.848	189.828	63.4203	70.0704	61.7664	51.9042	21.598	39.5137	96.7063	18.5038	42.7149	72.114	31.5633	125.252	-0.122484	0.606944
chr15	9393720	9396004	0.204052	0.123215	0.466569	0.567176	1.23446	0.382965	0.853657	0.465676	2.13787	1.19511	1.78533	0.503247	1.58479	0.194932	0.199664	0.132275	0.18018	0.675676	0.550315	0.194595	chr15	9394541	9396541	PXN,uc_338	31.2516	35.693	11.2828	36.2136	4.16975	48.9479	44.7241	28.2541	26.4253	31.5109	4.76666	30.3603	10.8667	29.9207	23.1098	27.3583	37.9102	40.6419	19.7164	64.9474	-0.483216	0.0309023
chr15	9436169	9439494	21.3584	28.0309	35.014	23.8738	26.6842	18.286	27.7277	25.9508	17.0687	26.0003	22.8766	28.136	31.5764	27.7185	35.0502	8.313	41.9889	38.7937	32.2017	30.3167	chr15	9434753	9436753	RPLP0	627.009	293.25	551.669	626.828	205.42	679.904	625.565	331.82	217.2	746.984	237.48	408.904	277.191	444.281	361.673	1524.51	216.474	461.72	278.176	164.453	-0.588483	0.00634281
chr15	9436169	9439494	21.3584	28.0309	35.014	23.8738	26.6842	18.286	27.7277	25.9508	17.0687	26.0003	22.8766	28.136	31.5764	27.7185	35.0502	8.313	41.9889	38.7937	32.2017	30.3167	chr15	9438302	9440302	GCN1L1	66.2922	18.7107	8.90991	25.0921	9.04205	11.1543	14.9965	13.1357	13.272	8.54195	7.87556	10.3804	9.07725	13.8694	13.2018	12.8555	8.02099	9.4784	9.07577	11.8591	-0.261287	0.26582
chr15	9565735	9566267	0	0.108696	0	0.0522466	1.04167	0.617284	0.14881	0	0	3.84615	0	0	0	0	0	0	0	0	0	0	chr15	9563957	9565957	CIT	0.259519	0.299993	4.88459	0.255912	69.301	0.199079	4.32619	0.998483	0.928692	0.889164	64.0938	1.14954	0.0399916	0.154009	0.200712	0.26269	0.14805	0.419744	5.59212	0.297054	0.0932037	0.69592
chr15	9893529	9894949	0.0289855	1.05539	0.0498504	0.505051	0	0	0	2.51572	0.961538	0.0332226	0.060024	0	0.402047	0.0322061	0.0661376	0.159685	0	0.892857	0.0414746	0	chr15	9892181	9894181	VSIG10	5.15377	10.3122	5.57688	5.91367	8.96757	16.6177	12.4805	5.08573	6.93253	7.78524	8.04949	5.1769	27.4899	6.19436	54.5276	7.45312	5.47114	3.66283	9.09952	1.69077	-0.133943	0.573442
chr15	9919646	9921245	15.6101	18.4746	20.1743	4.66385	18.0923	8.77305	9.66475	13.8456	11.8091	13.965	12.5916	10.4259	5.51971	14.6065	5.78345	14.1003	21.7901	11.7429	15.6365	9.88005	chr15	9917827	9919827	ENSGALG00000007498	0.305485	0	0	0	1.79505	0	0.306342	0	0.330154	0.400629	4.01953	0.135943	0	0.349461	0	0	0	0	0	0	0.100122	0.674494
chr15	10026476	10027113	0.0584007	0.296487	0.359894	0.0304321	0.0326797	0	0.0469138	0.0252589	0	0.107143	0.0906748	0.214642	0.00985028	0.159592	0.0296199	0.107033	0.359444	0.114662	0.0926376	0.211088	chr15	10025674	10027674	CARD8	0.96456	7.59411	5.46387	2.49938	0.434971	1.61208	2.25412	4.05369	7.58917	1.65065	0.580041	4.00081	1.71881	2.49976	1.99417	1.0085	4.40778	3.46009	1.9841	3.95091	0.49287	0.0272448
chr15	10812971	10814347	29.8846	26.9329	57.6051	37.2493	45.1127	38.0293	35.8066	39.4321	48.2238	30.7365	48.128	32.5921	35.2478	47.4028	15.4595	27.9067	50.8287	31.178	42.9094	39.4156	chr15	10812683	10814683	RNF215	3.01326	3.9493	4.55174	3.22938	7.4748	4.02363	4.97119	2.65892	2.67331	3.22053	9.35312	4.71978	2.3745	4.03199	2.71659	4.32013	6.071	4.05083	5.02545	0.358193	0.3843	0.0943394
chr15	10812971	10814347	29.8846	26.9329	57.6051	37.2493	45.1127	38.0293	35.8066	39.4321	48.2238	30.7365	48.128	32.5921	35.2478	47.4028	15.4595	27.9067	50.8287	31.178	42.9094	39.4156	chr15	10812683	10814683	CCDC157	0.178024	0.345256	0.308685	0.407253	0.724723	0.241605	0.0546256	0.240534	0.153561	0.0627986	0.75102	0.564926	0.633861	0.0663449	0.244422	0.546115	0.249972	0.212828	0.331697	0.0747099	0.06924	0.77177
chr15	10827114	10827788	0.159721	0.0834431	0	0.0273224	0.0821018	0	0	0.107759	0	0.0183453	0.13017	0.182171	0	0.0307882	0.446247	0.043592	0.0957854	0	0.0610153	0	chr15	10825289	10827289	SF3A1	18.7904	14.5446	14.2826	11.8674	17.7303	10.23	26.4452	13.2836	13.4968	17.1896	19.848	15.6803	9.18134	10.5842	9.16559	10.3326	8.47329	12.2577	13.4639	16.448	-0.127263	0.592874
chr15	11035102	11036420	0.0520833	0.971105	0.246679	2	0.216183	0.0862479	0.421856	0.0936496	1.18556	1.96006	0.406081	0.130536	1.49055	0.276353	0.0661376	2.93062	2.0582	0.0740474	0.107933	0	chr15	11033678	11035678	ZMAT5	22.0875	17.7063	13.9138	20.3659	11.924	16.7298	23.1795	9.12335	18.8235	13.8171	15.1964	12.4773	17.0612	20.8383	22.0891	14.8967	14.4861	10.2693	8.64118	1.97996	0.182496	0.441242
chr15	11142803	11155577	54.7471	36.1894	64.0567	42.5782	51.5418	56.7874	50.5031	56.39	62.879	53.0397	59.8915	52.2861	46.0771	53.0729	28.4603	51.0931	57.4589	56.1326	39.5848	64.9238	chr15	11147675	11149675	EWSR1	13.0497	13.1005	25.4181	10.8015	21.8787	15.7011	16.6118	14.0706	20.3194	15.452	19.9847	16.7166	8.79632	16.6286	19.3948	7.51593	14.5466	12.8598	15.5422	6.85645	0.119093	0.617009
chr15	11170719	11171640	0	0	0	0	0.232558	0	0	0	0	0.0347102	0	0	0	0	0	0	0.210526	0	0	0	chr15	11170141	11172141	EMID1	0	3.7928	1.94303	3.74058	4.70317	2.52035	3.91847	2.13521	1.37313	3.92486	9.52661	7.1141	1.31272	2.70751	0.662905	0.672648	0.699653	1.07039	1.55346	0.202917	0.0313134	0.895734
chr15	11187232	11193017	38.5675	34.4326	74.6586	41.834	47.183	30.378	50.5956	43.8266	41.6359	48.4776	63.0119	43.4663	40.3747	41.8232	35.9502	39.9804	62.7685	40.5965	54.5637	49.0063	chr15	11189729	11191729	RASAL1	0.209626	0	5.74028	0.117761	0.758152	0.358377	0.0861592	0.172523	7.79457	0	7.31022	2.90211	1.02377	0	50.5617	0	1.69901	0.156508	0.850311	0	-0.109139	0.646932
chr15	11340450	11343481	38.2868	7.39203	33.1056	33.3396	41.6788	38.6708	34.9994	39.406	9.89917	31.5429	31.9955	39.3645	27.7049	42.6582	26.4573	40.1569	39.1301	27.0727	31.0432	36.3126	chr15	11338778	11340778	TESC	0	8.85065	14.2349	0.624241	38.1453	1.75624	14.3498	1.07875	12.7899	0.765212	58.1903	3.30763	1.37559	16.8613	1.51875	1.78347	12.6634	1.53845	2.16618	0.695876	0.0516236	0.828874
chr15	11340450	11343481	38.2868	7.39203	33.1056	33.3396	41.6788	38.6708	34.9994	39.406	9.89917	31.5429	31.9955	39.3645	27.7049	42.6582	26.4573	40.1569	39.1301	27.0727	31.0432	36.3126	chr15	11342241	11344241	FBXW8	6.64972	11.7326	6.85128	5.88699	9.28634	6.84146	4.31609	5.67781	6.59259	4.20481	7.43347	4.7455	5.93611	5.59697	6.38806	9.74331	4.37432	4.37616	5.57718	3.72972	-0.324948	0.162137
chr15	11433690	11434960	0	0.262467	0	0.210084	0.392157	0	1.2012	0	0	1.5625	0.217391	0.543478	0	0	0	0.684932	0	1.75439	1.72956	0	chr15	11432072	11434072	C15H12ORF49	24.9118	6.94649	2.03421	13.1475	30.4467	5.69585	8.23399	10.331	3.84095	4.54183	25.7636	4.1704	5.21913	6.64504	8.64925	3.46325	2.98124	4.902	9.90252	10.369	-0.133184	0.575638
chr15	11553541	11554416	0	0.531324	0.255102	0.137534	2.39137	0.274725	0	0.255102	0.212314	0.204082	1.2381	0.43758	0.155763	0.15873	0.235849	0.85034	0	0	0.497977	0.0865801	chr15	11553249	11555249	MED13L	20.0102	17.488	8.93651	9.42222	4.73761	8.17915	4.53026	8.06959	11.1535	10.3674	5.25773	12.2391	5.14838	8.46761	7.20228	11.0571	8.79358	16.5263	11.2849	20.7517	-0.340432	0.14191
chr15	12195141	12225656	46.9468	23.8817	41.357	38.356	22.099	20.9104	38.5179	43.7099	27.1372	38.5826	24.3232	38.1816	31.0817	41.9151	30.104	51.3121	31.3037	37.3557	37.592	38.7271	chr15	12195003	12197003	ENSGALG00000008246	0	1.37806	0	0	0	0	0	0	0.171859	0	0	0	0	0	0	1.01309	0.734675	0	0	0	-0.0539788	0.821185
chr15	12195141	12225656	46.9468	23.8817	41.357	38.356	22.099	20.9104	38.5179	43.7099	27.1372	38.5826	24.3232	38.1816	31.0817	41.9151	30.104	51.3121	31.3037	37.3557	37.592	38.7271	chr15	12205035	12207035	TBX3	8.29656	20.7889	0.481583	5.2552	1.81006	2.38947	7.19989	2.9311	8.66791	11.2001	1.2056	6.91784	6.72136	10.2754	1.52741	1.5737	15.4265	14.1327	4.60092	8.11882	-0.0904715	0.704444
chr17	308849	309771	1.42803	0.237414	3.55102	0	1.93057	4.05041	0.813849	2.33968	1.28534	7.51701	1.95747	1.394	3.47477	3.55556	1.85831	0.192308	1.09857	2.91038	1.82595	9.42029	chr17	306996	308996	DPP7	12.6428	36.7526	8.59733	10.8022	9.67703	7.90063	13.4091	10.0517	8.26272	19.1427	7.27681	13.4101	9.25553	11.4993	16.8527	85.324	7.29952	7.66249	8.79279	6.02554	-0.296566	0.204197
chr17	308849	309771	1.42803	0.237414	3.55102	0	1.93057	4.05041	0.813849	2.33968	1.28534	7.51701	1.95747	1.394	3.47477	3.55556	1.85831	0.192308	1.09857	2.91038	1.82595	9.42029	chr17	306996	308996	ENSGALG00000009120	0.773662	0.451019	0.734439	0.509421	0.509927	0.449248	0.392641	0.521301	0.391038	0.64467	1.13976	0.727295	0.0916255	0.864742	0.540782	8.11185	0.704823	0.432684	0.667837	0.93364	-0.198172	0.402288
chr17	412365	418908	6.78815	7.96784	3.99499	12.245	11.3734	6.72795	1.77154	11.0652	4.01201	4.62674	30.8824	16.4056	2.20734	17.9753	12.668	2.85376	11.8056	12.0701	26.2379	16.2678	chr17	413521	415521	CLIC3	0.137839	0.794491	0.560044	2.87568	0.450177	74.2953	4.53788	10.6239	0.848859	4.47147	0.482177	2.69644	0.575032	1.21252	1.45538	0.280739	17.4392	13.8864	9.41454	4.91863	-0.0697067	0.770271
chr17	412365	418908	6.78815	7.96784	3.99499	12.245	11.3734	6.72795	1.77154	11.0652	4.01201	4.62674	30.8824	16.4056	2.20734	17.9753	12.668	2.85376	11.8056	12.0701	26.2379	16.2678	chr17	416531	418531	ABCA2	5.00235	5.90054	5.00605	2.76561	19.1128	7.67071	3.20973	1.64355	2.93379	5.87433	23.8361	8.71133	1.51045	8.06405	3.84044	3.17146	1.62069	2.67052	7.87892	2.34361	0.583058	0.0069707
chr17	548504	551009	4.57595	0.437145	1.13636	0.314079	5.70911	5.85859	2.32093	0	0.959361	0.140647	11.9293	2.5138	0.544555	1.59429	0.118343	1.28054	0.31941	1.08798	3.40632	0.0945838	chr17	548446	550446	EDF1	148.77	353.778	77.0037	116.488	98.682	114.527	100.886	60.9345	94.7189	92.7035	111.49	87.351	66.2004	144.959	220.625	293.049	116.479	78.1971	64.5665	51.4535	-0.0983063	0.680096
chr17	566849	570722	60.0487	31.0433	61.4758	48.2994	59.5971	53.468	50.4305	53.4322	39.2352	59.0424	59.858	50.296	51.1131	47.0939	51.8872	48.2317	62.0942	42.5876	60.1135	55.8368	chr17	566201	568201	C9orf172	0.538563	0.284883	1.07912	0.565167	24.4353	0.749845	0.9425	0.651813	0.983358	0.896714	27.0516	1.14	0.294903	0.913948	0.466203	0.261575	2.61985	1.28714	3.17378	0.821586	0.351472	0.128615
chr17	576115	577278	2.98507	15.4324	2.53165	0.260591	0.097371	18.8726	1.48084	1.74129	12.0026	4.26829	0.4329	0.520833	0	1.04167	0	5.47587	7.59494	0	9.91302	4.42857	chr17	577183	579183	RABL6	8.86148	11.0791	6.80308	4.15727	18.2993	8.60756	7.34468	4.36219	5.19145	8.34058	14.6258	9.29732	4.30972	6.07008	4.83965	18.9591	4.58655	5.96021	6.06191	8.61347	0.0209651	0.930091
chr17	652546	660349	19.1924	17.394	10.2922	6.78667	4.86479	11.1806	11.0047	13.9785	13.5914	24.8626	18.5359	28.8632	4.43116	7.78418	19.0283	31.4901	11.5897	21.8288	25.6013	5.15298	chr17	650942	652942	NRARP	1.71633	1.78648	2.10913	1.04579	3.01156	3.06274	4.85386	9.92782	3.24366	6.48962	8.48092	11.7191	2.89091	6.52002	0	2.04801	2.07681	9.25351	4.81652	0	0.387058	0.0918013
chr17	652546	660349	19.1924	17.394	10.2922	6.78667	4.86479	11.1806	11.0047	13.9785	13.5914	24.8626	18.5359	28.8632	4.43116	7.78418	19.0283	31.4901	11.5897	21.8288	25.6013	5.15298	chr17	657403	659403	NOXA1	0	4.10814	0.656162	0.0901012	0.157019	1.04765	0.407714	0.467678	0.768936	0.306542	0.359535	4.61399	1.1753	0.363283	3.43529	1.5927	2.68597	0.572074	0.756526	0.397112	0.374866	0.103413
chr17	652546	660349	19.1924	17.394	10.2922	6.78667	4.86479	11.1806	11.0047	13.9785	13.5914	24.8626	18.5359	28.8632	4.43116	7.78418	19.0283	31.4901	11.5897	21.8288	25.6013	5.15298	chr17	657403	659403	EXD3	7.11332	4.62383	2.96486	3.74221	2.8583	3.35607	4.29174	2.25471	5.18703	4.22268	2.85253	5.38782	2.3084	2.82167	1.99372	2.04033	2.96458	3.62479	2.91418	3.48945	0.17868	0.451013
chr17	652546	660349	19.1924	17.394	10.2922	6.78667	4.86479	11.1806	11.0047	13.9785	13.5914	24.8626	18.5359	28.8632	4.43116	7.78418	19.0283	31.4901	11.5897	21.8288	25.6013	5.15298	chr17	657403	659403	ENTPD8	0.136699	46.4155	0.865979	0.208039	0.089088	1.43205	0.334233	0.193735	1.95408	0.437952	0.140958	17.8825	6.06156	0.211244	25.5738	1.44892	7.68689	0.419064	0.430428	0.299557	0.190272	0.421679
chr17	1449938	1451004	0.862069	2.0723	1.26984	0.255208	0.902778	2.15686	0.0892857	1.25	1.36719	0.622934	0.75	0.666667	0	0.25	0.625	0.852273	0	0	0.448125	0.707071	chr17	1448562	1450562	HDHD3	31.1487	112.106	39.6119	29.5463	44.4428	40.3055	55.2417	36.3528	23.264	18.2877	46.9887	21.8391	136.206	52.2558	81.2703	41.75	35.0693	26.9485	38.8548	7.87442	0.0366502	0.878081
chr17	1449938	1451004	0.862069	2.0723	1.26984	0.255208	0.902778	2.15686	0.0892857	1.25	1.36719	0.622934	0.75	0.666667	0	0.25	0.625	0.852273	0	0	0.448125	0.707071	chr17	1448562	1450562	BSPRY	0	3.84982	0.366967	0.369642	0.834948	2.96092	3.13788	4.93319	0.636451	2.71431	0.836552	4.25266	8.69742	0.172956	4.13347	9.91094	4.93642	3.36099	0.884876	1.46422	-0.110654	0.642342
chr17	1459324	1460598	0.094697	3.09378	8.53383	3.39969	11.1987	4.91775	0.529101	6.12637	3.34123	2.83727	7.12953	3.67777	0.909091	1.84528	1.31579	1.84524	10.4792	0.37594	8.96107	2.71335	chr17	1459387	1461387	WDR31	0.274816	1.82353	0.189837	0.425934	2.30699	0.594787	1.45627	0.997326	0.744288	2.11266	3.20149	1.5501	4.42658	1.07587	1.67215	1.58413	1.60687	0.602201	1.2778	0.418206	0.0598912	0.801953
chr17	1475228	1476420	0.100722	0.454545	0.113636	0.0262261	0	0	0.0680272	0.45	0.0841751	0.047824	0	0.113138	0	0.0451826	0.0904977	0.0325839	0	0.0526316	0.0704198	0.032175	chr17	1475155	1477155	SLC31A1	1.58892	124.967	3.8974	6.6543	12.2543	6.88215	11.4258	10.8723	5.44644	5.96405	12.4447	16.7812	10.0329	10.2852	24.135	3.37297	6.21195	6.20951	16.488	9.88883	0.663941	0.00141163
chr17	1475228	1476420	0.100722	0.454545	0.113636	0.0262261	0	0	0.0680272	0.45	0.0841751	0.047824	0	0.113138	0	0.0451826	0.0904977	0.0325839	0	0.0526316	0.0704198	0.032175	chr17	1473848	1475848	CDC26	15.6663	13.3396	12.9042	21.1458	13.4668	19.3135	28.3082	14.1266	12.4309	24.126	12.8405	15.7372	32.3725	20.6289	25.0429	11.0713	9.66828	12.7973	17.8763	1.17768	-0.131017	0.581922
chr17	1501096	1501934	0	1.06383	0.0371609	0	0.0398883	0	0.02405	0.0793651	0.0517598	0	0.200535	0.314577	0.041511	0.261628	0.0588235	0.0992063	0.173176	0	0	0	chr17	1499472	1501472	FKBP15	5.72345	11.4014	9.14712	5.12913	6.30086	5.19184	7.82296	9.13398	13.1854	5.60996	5.58327	8.52448	9.39214	6.31098	8.36174	6.98503	4.29601	6.58241	6.68606	7.97949	0.37487	0.103408
chr17	1501096	1501934	0	1.06383	0.0371609	0	0.0398883	0	0.02405	0.0793651	0.0517598	0	0.200535	0.314577	0.041511	0.261628	0.0588235	0.0992063	0.173176	0	0	0	chr17	1499472	1501472	ENSGALG00000008822	0	0.522513	0.338585	0	0	0	1.56232	0	0.488218	0	0	0	32.1753	0	0	2.5577	0	0.849737	0.991452	0	-0.07996	0.737547
chr17	1528337	1530209	26.4741	15.3934	33.9785	20.4443	26.0823	16.7331	8.47215	13.8357	13.5648	11.6377	24.5315	16.151	10.4636	34.6918	11.773	9.90964	20.3819	21.0347	19.2215	26.5612	chr17	1527748	1529748	LRSAM1	5.17535	6.22666	3.49095	5.13972	7.37254	4.37595	4.67667	5.63273	4.68283	3.4766	7.64148	4.31999	3.13345	7.04942	4.43111	4.14075	4.54828	3.91469	4.3733	4.43276	0.402822	0.0782439
chr17	1555317	1556483	0	0	0	0.114591	0	0	0	0	0	0	0	0.0768049	0	0	0	0	0.280112	2.38095	0.0256148	0.0852515	chr17	1553904	1555904	RPL12	327.599	396.033	484.781	519.47	237.072	593.34	580.242	304.225	527.865	512.838	247.505	400.17	357.94	529.417	504.724	514.861	280.584	395.082	229.757	219.172	-0.0593537	0.803697
chr17	1555317	1556483	0	0	0	0.114591	0	0	0	0	0	0	0	0.0768049	0	0	0	0	0.280112	2.38095	0.0256148	0.0852515	chr17	1553904	1555904	SNORA65	0	0	3905	3529.5	0	0	0	0	0	0	0	0	0	438.914	0	0	1942.37	93.3883	0	0	-0.024878	0.917082
chr17	1555317	1556483	0	0	0	0.114591	0	0	0	0	0	0	0	0.0768049	0	0	0	0	0.280112	2.38095	0.0256148	0.0852515	chr17	1553904	1555904	SNORA65	0	0	1972.82	0	0	0	698.615	0	2580.66	0	0	0	276.821	0	0	0	924.311	278.977	0	725.377	-0.0165979	0.944629
chr17	1561839	1562406	0.144944	0.11443	0.575498	1.66706	0.734719	0	0.135142	0.462963	1.12573	0.183889	0.597376	0.0463822	0.335027	0.345176	0.0580026	0.472704	0.21261	0.338393	0.28598	0.305948	chr17	1562029	1564029	ZMYND19	10.1326	5.83205	7.49194	10.4991	11.3406	7.52183	22.3102	6.1194	7.33049	7.63029	8.78035	7.37195	7.26613	8.48266	6.11067	3.99511	7.05071	8.28474	4.34879	3.64833	0.0629144	0.792161
chr17	1583252	1584315	0.424568	0.178851	0.888997	0.388876	0.870877	0.817664	0.639689	0.542605	2.35221	0.314314	0.620446	0.685927	0.520616	0.519798	0.340168	0.502507	0.633303	0.634252	0.61173	2.76352	chr17	1581894	1583894	PNPLA7	12.9849	23.0373	6.61056	8.28986	2.75582	10.0349	11.0193	4.25937	4.92869	5.53662	2.48379	8.23525	12.0461	18.2978	29.2691	14.8524	7.40385	4.63699	6.63655	5.11968	-0.387858	0.0910739
chr17	1717128	1718125	2.6087	0.417549	0.869565	0.406059	0.182974	0.193185	0.15873	0.676775	0.721269	0.858354	0.287356	0	0.72314	0.169864	0.900901	0.501543	1.73913	0.806452	0.222445	0.584795	chr17	1715503	1717503	NSMF	2.75032	9.76262	1.4805	4.80308	42.133	2.91803	8.06924	1.17643	3.56075	4.63241	49.79	5.07335	5.49727	8.08839	461.475	0.653203	3.19525	3.37333	15.5259	2.52838	0.0559022	0.814917
chr17	1717128	1718125	2.6087	0.417549	0.869565	0.406059	0.182974	0.193185	0.15873	0.676775	0.721269	0.858354	0.287356	0	0.72314	0.169864	0.900901	0.501543	1.73913	0.806452	0.222445	0.584795	chr17	1715503	1717503	ENSGALG00000021318	0	0	0	0.224207	7.0825	0.317443	0.93014	0	0.157748	0.999421	8.72101	0.24671	0.735206	0.499025	34.7908	0	0.294617	0.445685	2.13847	0.475473	0.00923356	0.969181
chr17	1812371	1812964	0	1.63043	4.78261	1.34974	2.657	1.24224	0.310559	0	0	0.76087	1.86335	2.17391	0.310559	3.62319	1.08696	2.17391	0	0	1.1773	1.16562	chr17	1810875	1812875	GTF2H4	19.5461	1.75603	1.28356	8.8073	9.51321	4.29048	8.92976	11.3526	2.60028	7.28714	13.58	8.21563	8.29232	6.39928	11.4778	4.36239	3.83568	10.3945	13.4777	11.5722	-0.350024	0.130307
chr17	1982563	1984683	1.25	1.40409	49	23.5087	11.1111	10	9.96732	35.2941	25.6712	21.8	6.88776	58.1633	17.7778	18.9542	2.5	9.58333	41.1765	0	13.235	34.183	chr17	1982299	1984299	EHMT1	11.7975	16.0777	17.9065	10.6255	13.0056	18.8176	13.4861	11.7756	34.3015	14.5645	12.3489	17.2988	12.5182	12.631	21.0284	11.2061	11.1748	12.6736	11.1666	12.3953	0.105598	0.657706
chr17	2099992	2100758	4.29762	4.22222	11.3575	2.45349	1.33923	0.446429	1.85185	8.4898	6.79012	3.03035	2.83673	1.55446	8.33333	4.38577	4.7619	0.757576	11.8622	1.91219	2.99938	2.75806	chr17	2098321	2100321	CACNA1B	0.0296718	0.0390788	0	0.026719	23.4322	0.575685	0.118672	0.0400633	0	0.0620119	23.6214	0.0644995	0.0389275	0.0682163	0.032712	0.231954	0.131898	0.0348647	1.49569	0.0623863	-0.238598	0.311028
chr17	4819120	4821207	8.28403	1.80432	15.0669	6.10814	6.53999	6.49387	5.38429	9.48055	5.45223	4.01491	6.82252	1.2037	5.05996	9.375	10.115	2.9592	7.34082	9.79936	23.9437	19.8413	chr17	4818657	4820657	NAIF1	16.5672	12.7426	11.0749	13.6504	6.62722	7.19205	15.0794	7.25761	17.0533	9.86652	8.15787	9.82218	11.3971	12.2897	7.18945	5.97649	7.32208	9.50867	8.9214	6.15153	-0.232213	0.324539
chr17	4865271	4880730	36.6103	31.2053	50.905	43.3819	50.5825	37.5102	29.1488	45.0774	42.8812	37.5201	42.2527	47.1175	42.4152	42.4483	39.1286	40.6293	48.5075	40.5251	41.8523	35.8838	chr17	4863440	4865440	DPM2	1.88167	13.6159	5.58133	6.55155	7.3674	6.0913	14.0347	8.78376	6.96628	6.34694	7.09005	5.19647	11.1274	6.11849	13.0182	7.40855	7.14009	7.54368	7.60664	4.00105	-0.381825	0.0966617
chr17	4865271	4880730	36.6103	31.2053	50.905	43.3819	50.5825	37.5102	29.1488	45.0774	42.8812	37.5201	42.2527	47.1175	42.4152	42.4483	39.1286	40.6293	48.5075	40.5251	41.8523	35.8838	chr17	4868176	4870176	ST6GALNAC4	39.0003	10.4014	11.9781	43.7238	5.54249	19.5758	21.6943	19.4682	11.3926	10.3567	8.64678	17.2966	10.0852	20.8984	13.8218	6.38839	13.4977	18.0414	13.3909	6.2543	-0.131158	0.581512
chr17	4865271	4880730	36.6103	31.2053	50.905	43.3819	50.5825	37.5102	29.1488	45.0774	42.8812	37.5201	42.2527	47.1175	42.4152	42.4483	39.1286	40.6293	48.5075	40.5251	41.8523	35.8838	chr17	4870084	4872084	ST6GALNAC6	14.0838	2.19351	1.63204	22.0802	53.7594	10.2709	18.9436	28.7475	4.17565	20.9411	83.0442	13.0901	4.34899	54.1956	4.53095	0	30.0871	33.3818	28.8492	4.5667	0.273187	0.243858
chr17	4865271	4880730	36.6103	31.2053	50.905	43.3819	50.5825	37.5102	29.1488	45.0774	42.8812	37.5201	42.2527	47.1175	42.4152	42.4483	39.1286	40.6293	48.5075	40.5251	41.8523	35.8838	chr17	4874872	4876872	AK1	1753.61	2.42311	3.00863	1144.98	59.6109	14.0924	32.9019	2.63459	3.83269	24.7874	52.4693	4.76629	2.90211	139.568	0.575524	0.59826	6.09524	8.12021	84.5136	0.833775	-0.110454	0.642947
chr17	4944389	4949242	32.4503	19.0446	24.6955	38.7706	37.4534	35.913	43.9973	46.8156	20.7061	35.4272	31.76	40.8824	21.2579	21.5841	54.1652	35.0969	16.6593	38.2624	44.0072	17.7305	chr17	4947345	4949345	URM1	47.7158	43.3496	26.2994	45.4866	27.4079	46.4568	29.2711	24.01	37.0899	36.1033	24.5098	19.7058	32.0828	55.6097	38.3954	69.6256	19.4348	31.4184	22.8796	15.5302	0.00177727	0.994067
chr17	4981229	4988366	41.4186	16.1513	37.1981	34.3009	28.7048	37.3953	26.0724	29.9888	17.6747	34.4521	38.2059	39.7119	32.9787	40.9175	24.6759	30.2496	35.7968	64.6104	29.9744	40.56	chr17	4985539	4987539	TRUB2	4.00875	12.5655	6.55021	4.84051	3.89137	7.43656	10.1844	5.10947	10.4631	4.07269	3.88854	5.3958	6.19043	7.62048	13.0491	7.24646	5.36566	5.3733	3.5503	3.33834	-0.558569	0.0104716
chr17	5103238	5111107	11.7186	1.37167	1.16073	2.86784	0.180956	0.0554017	0.308044	8.69621	0.623518	0.0138198	0.0506073	1.17829	0.146199	0.944225	0.0923361	3.17896	0.342918	2.30195	2.15156	11.9045	chr17	5102161	5104161	ODF2,PTGES2	78.7904	32.8841	19.8661	37.9144	47.4615	18.2647	30.0795	18.4269	18.8361	16.8505	40.5996	13.8659	25.2895	64.0052	21.8906	13.4069	10.2165	14.1738	19.2757	10.3041	0.197404	0.404151
chr17	5128575	5129537	0	1.14882	4.2735	1.10193	0.480769	0	0.641026	2.65487	3.39768	2.29437	2.53623	0	6	1.0101	1.02041	2.18579	1.86567	0	0.835422	0	chr17	5126827	5128827	GLE1	3.88309	2.77974	6.45042	3.17001	2.94279	3.18306	4.33824	3.25529	4.58596	2.49019	2.21922	2.89095	2.5415	2.80038	4.65706	2.33012	3.3921	4.01392	1.94437	3.47237	0.123618	0.603593
chr17	5139586	5140358	0	0	0	0	0	0.284091	0	0	0	0	0	0	0	0	0	0.378788	0	0	0	0	chr17	5137718	5139718	SPTAN1	21.7712	26.5166	114.223	36.6137	202.573	26.6239	46.1317	65.5666	24.1026	33.6734	177.245	46.7199	25.9524	140.027	71.9061	14.7274	52.4568	45.1555	49.817	42.6186	-0.275611	0.239531
chr17	5139586	5140358	0	0	0	0	0	0.284091	0	0	0	0	0	0	0	0	0	0.378788	0	0	0	0	chr17	5137718	5139718	WDR34	0.526363	1.35761	1.9635	2.10523	1.70349	1.82103	2.16765	2.9469	1.66647	0.846715	2.68519	2.25768	1.99174	0.939084	4.88318	2.57215	1.87698	2.69686	1.69042	1.23092	0.0918966	0.699994
chr17	5206364	5208391	0.552232	3.51686	1.56125	0.637755	4.10513	4.4223	1.79035	0.743547	9.0807	0.732168	5.37311	3.04222	3.20879	5.54646	2.91043	5.41688	1.72918	0.917444	7.85124	2.38095	chr17	5205120	5207120	SET	59.1277	29.7202	38.0336	32.8312	27.5674	26.7481	41.9407	36.6043	46.2378	27.3361	33.541	39.6799	17.7188	32.8052	22.6032	19.6341	21.1855	26.8047	23.4915	39.1534	-0.136515	0.566036
chr17	5217619	5219187	1.38545	3.1433	15.8591	6.43621	4.9367	2.18244	2.77797	10.651	4.35841	4.75796	1.45553	13.6742	4.41156	7.38636	6.03175	6.04396	15.1772	1.45631	4.71317	13.7722	chr17	5216148	5218148	PKN3	3.17401	1.77436	1.46272	2.39978	1.4758	6.40623	6.62542	3.21872	3.18435	4.55436	0.708945	6.02332	1.73396	7.93445	6.17471	1.33037	4.53666	4.12772	2.25672	3.93864	0.0839366	0.724968
chr17	5457437	5458498	0.0625	0.225661	0.245521	0	0.952381	0.0247712	0.026738	0.0975816	0.0514403	0.147883	0.0589164	0	0.043592	0.180288	0	0	0.228751	0.131515	0	0.909091	chr17	5456185	5458185	FAM73B	1.69001	42.8104	3.34596	3.83501	15.9087	19.5015	8.77062	3.26386	8.30554	9.20102	17.776	7.7113	8.37466	26.0615	10.9372	10.1582	4.17579	4.72361	6.40931	5.9803	0.0912265	0.702085
chr17	5477368	5478400	0	0	0	0	0	0	0	0	0.714286	0	0	0	0	0	0	0	0	0	0	0.154321	chr17	5475915	5477915	DOLPP1	3.00119	19.4057	3.59283	4.35422	6.36312	4.09889	12.4888	5.77098	15.8596	4.48451	7.57714	6.28168	6.79912	3.37825	14.0057	4.7472	3.64169	4.3242	5.41992	4.32342	0.414906	0.0689048
chr17	5508919	5509894	0	1.65289	0	0.0297619	0.040016	0	0	0	1.76471	0	0	0	0	0.154869	0	0	0.156688	0.0544662	0.023116	0.95107	chr17	5507514	5509514	PPP2R4	11.3094	22.8356	9.85008	12.813	20.0021	12.8308	18.7225	12.5967	10.5194	12.1164	22.1005	11.2204	10.9019	15.94	14.8258	9.32466	8.97881	10.3757	14.0904	7.31011	0.0957838	0.687903
chr17	5694131	5695059	0	0.0272331	0	0.176152	0.0759878	0.310559	0	0	0.57971	0.101544	0	0.122449	0	0.0452899	0	0	0	0	0.0396118	0.0434028	chr17	5692254	5694254	TOR1B	13.5992	24.0263	6.64624	22.7019	5.51286	19.6374	39.7214	25.0826	15.2368	34.1791	5.10254	23.0182	17.4772	19.2258	20.3552	12.0331	16.7091	21.1499	13.2017	24.5498	-0.00428508	0.985695
chr17	5694131	5695059	0	0.0272331	0	0.176152	0.0759878	0.310559	0	0	0.57971	0.101544	0	0.122449	0	0.0452899	0	0	0	0	0.0396118	0.0434028	chr17	5692254	5694254	TOR1A	15.3016	35.4075	11.9706	13.5662	12.9938	13.1737	21.4493	11.3054	13.8373	15.6868	12.5735	12.448	14.7226	12.4925	18.0146	17.5104	12.5415	11.2317	10.4118	10.7702	-0.107581	0.651664
chr17	5818926	5824970	0	1.99134	0	0.0264271	0	0	0.189394	0.153846	0.771011	0.00992064	0.030012	0.706392	0.625	0	0	0	0.684932	0	1.08696	0.694444	chr17	5818631	5820631	GPR107	8.96592	15.6782	10.4893	8.28886	8.31046	8.99799	11.4295	14.6659	15.0203	8.16511	8.66088	9.79347	6.3244	9.4173	16.0881	12.3198	9.50455	10.633	11.4538	15.0328	0.402804	0.0782583
chr17	5863158	5870927	44.3897	34.513	45.5992	45.0844	35.7625	20.8296	38.0574	40.4341	35.7756	45.4158	35.4592	47.898	32.9354	41.1196	35.5513	30.081	43.3971	40.3379	36.4852	37.398	chr17	5862327	5864327	NCS1	0	0.26152	0.639673	0.905814	102.206	73.4021	4.30213	1.01933	0.173561	4.22447	130.075	2.79284	6.10615	1.08539	8.60484	0	0.617177	4.62894	8.4419	0.782643	-0.419782	0.0653833
chr17	5952773	5964799	23.5137	10.6377	29.3124	22.6297	30.9677	25.1283	23.5088	25.2512	16.8234	26.3962	33.8518	33.9505	22.7586	18.0308	15.7265	17.6704	19.8974	24.5156	33.971	31.005	chr17	5954540	5956540	PRDM12	0	0.228932	0	0	0	0	0.174382	0	0	0	0.10817	0.076555	0	0	0	0	0	0	0	0	-0.178954	0.450309
chr17	5952773	5964799	23.5137	10.6377	29.3124	22.6297	30.9677	25.1283	23.5088	25.2512	16.8234	26.3962	33.8518	33.9505	22.7586	18.0308	15.7265	17.6704	19.8974	24.5156	33.971	31.005	chr17	5962137	5964137	EXOSC2	12.5786	19.6628	12.8294	13.6222	23.4476	8.41847	18.4136	10.519	13.868	8.06561	22.8019	10.2355	7.34315	9.69425	9.58355	9.00144	7.33318	8.45413	8.60032	5.64776	0.051614	0.828905
chr17	6078837	6079619	1.31593	1.54605	4.01203	1.22341	5.12355	0.738916	2.40013	1.53605	0.815765	0.923907	2.4244	2.89247	1.23599	1.2828	1.32827	1.80725	2.35154	1.1901	1.56888	2.18331	chr17	6077261	6079261	AIF1L	22.3335	127.697	33.5519	39.1938	18.094	14.8751	44.9917	23.8333	88.7764	40.7213	18.507	35.0607	67.1677	37.1972	44.881	4.48185	15.6418	57.9019	30.498	26.3379	-0.296338	0.204562
chr17	6092061	6092752	0.0733479	0.115741	0.0508159	0	0.03663	0.0122324	0.0233754	0	0	0	0.0493421	0	0	0.0442087	0.0187688	0	0.0484262	0	0.301205	0	chr17	6090213	6092213	NUP214	10.4069	10.7606	6.93098	7.29394	5.24954	5.40583	8.01242	8.43161	12.719	7.19579	4.89234	8.34686	6.23896	6.41136	10.0654	4.45207	5.55845	6.59708	7.08058	9.77517	0.0157597	0.947422
chr17	6237284	6243125	39.5832	25.7378	45.0838	36.0011	34.2775	38.1848	34.9962	39.5755	42.7378	46.9661	44.1387	41.3681	35.0622	37.6837	38.7718	34.7827	39.4294	38.8457	39.4607	37.7967	chr17	6239867	6241867	RAPGEF1	2.81704	1.08731	0.764887	1.11762	0.471833	0.742488	0.414708	0.466643	1.22665	1.4769	0.533704	1.5449	0.425888	1.20181	0.463566	0.516774	0.546722	0.977107	1.09308	1.64264	0.181666	0.443358
chr17	6237284	6243125	39.5832	25.7378	45.0838	36.0011	34.2775	38.1848	34.9962	39.5755	42.7378	46.9661	44.1387	41.3681	35.0622	37.6837	38.7718	34.7827	39.4294	38.8457	39.4607	37.7967	chr17	6239867	6241867	RAPGEF1	33.7206	5.88055	4.17795	7.44249	4.19592	3.95111	3.42526	3.38222	5.65276	6.77905	4.75036	8.32386	2.57872	6.25168	1.7227	3.17602	4.73282	5.30912	6.9806	6.42814	0.0945988	0.691581
chr17	6517892	6518551	0.0182648	0.0259875	0.0568182	0	0.132626	0.0522466	0.0315657	0	0.0865209	0	0	0	1.13402	2.58621	0	0	0.176056	0	0	0	chr17	6518527	6520527	TTF1	9.03887	4.62363	3.87992	4.91114	3.45635	3.0024	5.35383	4.45483	6.30712	2.93049	3.51744	3.90228	2.68793	4.21305	3.03305	2.04191	3.23798	3.99676	2.74255	7.87108	-0.0961729	0.686697
chr17	6635242	6636434	0.214428	0.111128	0.34666	0	0.095816	0.25641	0.093985	0	0.118915	0.776397	0.331115	0.140056	0.0510204	0.189394	0	0.058548	0.213942	0.107527	0.102407	0.0710227	chr17	6633938	6635938	GTF3C4	3.36119	2.68564	2.13207	2.4234	5.00994	2.06537	2.08471	1.80822	2.51509	2.11743	4.80129	2.14096	1.30074	2.86207	1.85027	1.59992	1.36025	2.37658	3.17722	4.39589	0.0412748	0.862829
chr17	6828163	6828812	19.6928	4.40433	16.6175	5.33333	6.05324	4.14634	2.64069	13.2765	16.7133	4.90591	3.48499	9.54594	5.56935	7.40741	2.27451	8.04129	6.26874	9.88909	6.21059	8.96821	chr17	6828388	6830388	GBGT1	17.9519	1.88982	1.7855	9.67401	1.54346	6.6779	3.31155	2.54442	6.10502	4.16197	1.79039	2.98768	2.39383	8.82265	6.68368	11.7136	2.31305	3.89932	3.35542	3.47873	0.359154	0.119903
chr17	6865490	6865996	0	0	0	0.114416	0	0	0	0	0	0	0	0	0	0	0	0	0	0	0	0.14881	chr17	6863633	6865633	RPL7A	429.471	697.3	477.157	749.613	199.757	789.684	834.339	533.451	743.662	366.185	189.284	373.042	485.675	826.392	543.867	871.273	237.707	630.841	284.378	324.978	-0.0296718	0.901174
chr17	6889307	6890646	0	0.671141	0	0	0	2.32558	0	0	3.125	0.54054	0	4	0	0	4.7619	0	0	0	0	0	chr17	6888430	6890430	STKLD1	1.45837	1.73026	0.540696	1.12799	1.36429	0.671127	1.29136	0.822482	1.45619	0.724024	0.688306	0.929569	1.35416	0.886396	1.35229	0.430634	0.546271	0.951612	0.650308	1.8192	0.150962	0.525228
chr17	6889307	6890646	0	0.671141	0	0	0	2.32558	0	0	3.125	0.54054	0	4	0	0	4.7619	0	0	0	0	0	chr17	6888430	6890430	REXO4	2.99667	5.35243	1.90873	3.22741	2.61971	2.42508	6.76163	2.16765	3.73134	1.82005	2.53389	2.22078	2.08287	3.71425	1.08573	1.86056	1.119	1.74818	1.47803	2.49617	-0.131868	0.57945
chr17	6970984	6971844	7.46837	1.18471	0.110381	1.44607	0.239418	0.0829187	1.00116	0.0730994	0.10142	0.195756	0.965292	2.99384	0.01998	0	0.281477	0	0.650808	0.168628	1.55047	0.260417	chr17	6969601	6971601	ADAMTSL2	13.1184	4.12061	9.58796	25.2219	2.45353	6.36133	9.52178	3.77201	6.29401	13.6308	3.85841	36.1996	4.64932	50.0528	1.47247	7.49416	9.93074	8.93874	6.796	12.9094	0.169585	0.474746
chr17	7196664	7197383	0	0	0	0.0757576	0.30303	0	0	0	0.45045	0	0	0	0	0	0	0	0	0	0.185185	0.0905797	chr17	7196593	7198593	WDR5	17.7558	10.5421	7.25222	11.2632	8.25436	6.82481	12.4948	5.00028	7.10775	9.53548	9.81334	8.18046	4.95583	8.25002	6.66129	10.1348	3.67419	5.33497	6.63576	9.87422	-0.0934316	0.695211
chr17	7809188	7809955	8.30701	19.5543	5.48631	9.93902	9.40412	5.092	2.26609	2.5085	3.21927	3.43228	8.70851	6.6369	3.81416	1.66444	0.487316	4.84063	6.36014	2.41854	5.83333	0	chr17	7807316	7809316	NOTCH1	5.28058	2.24852	12.1046	4.54806	3.28167	5.80899	4.55956	15.3927	6.57917	8.72158	3.50777	14.6639	5.59218	12.1367	4.28564	3.57049	11.7928	13.6024	8.21544	12.0587	-0.460059	0.0412464
chr17	7888981	7892823	1.12469	3.11772	6.91976	1.9051	1.48481	3.74447	2.95946	11.6463	4.3333	2.02114	2.77062	4.3976	2.62953	2.30589	7.42366	3.32754	2.93728	2.69966	8.45845	8.589	chr17	7887811	7889811	CARD9,DNLZ,SDCCAG3,SNAPC4	6.54242	11.3194	11.4216	7.03377	8.59035	8.18357	7.20578	5.28797	15.4646	4.8725	9.24352	9.92502	8.81789	7.08562	10.8944	6.53272	7.86964	7.01285	6.25985	4.90294	-0.0748861	0.75369
chr17	7888981	7892823	1.12469	3.11772	6.91976	1.9051	1.48481	3.74447	2.95946	11.6463	4.3333	2.02114	2.77062	4.3976	2.62953	2.30589	7.42366	3.32754	2.93728	2.69966	8.45845	8.589	chr17	7887811	7889811	GPSM1	3.45365	2.87544	6.50314	4.16725	28.5807	11.8157	18.1488	7.21018	8.83463	6.09152	7.09798	6.17717	2.28937	19.3627	4.13064	16.7561	3.34216	6.05925	8.07271	8.09782	-0.192718	0.415621
chr17	8044029	8048280	5.71681	5.58999	7.34732	6.14852	4.7488	4.43942	4.06106	8.40767	8.84006	5.81209	6.47495	8.18687	4.08096	4.2554	1.91786	5.07795	5.46949	5.28571	9.24795	7.23039	chr17	8042545	8044545	LHX3	0.0809812	0	0	0	0	0	1.68876	0	0.0292138	0	0	0	0	0	0	0	0	0	11.9575	0.0819733	0.389664	0.0894487
chr17	8344187	8344789	0.398054	0	0	0.0821018	0.181969	0.622924	0	0.387597	0.111607	0.165896	0.0515996	0	0	0.383142	0.15873	0.0220022	0	0	0.177937	0.0494071	chr17	8342238	8344238	CNTRL	4.57045	4.67282	8.09574	3.2416	3.59998	4.46693	3.6474	2.30644	15.6086	1.77242	2.90606	4.70544	2.52321	4.97164	11.5333	4.4973	3.82659	3.83868	2.55481	6.73068	-0.0666529	0.780093
chr17	8344187	8344789	0.398054	0	0	0.0821018	0.181969	0.622924	0	0.387597	0.111607	0.165896	0.0515996	0	0	0.383142	0.15873	0.0220022	0	0	0.177937	0.0494071	chr17	8342238	8344238	RAB14	21.3345	49.7202	16.6057	23.1649	46.0602	22.059	34.5571	32.9655	30.5626	17.7311	44.6143	25.9011	27.2663	25.1575	41.7773	20.5641	24.1435	27.1759	23.831	37.1922	-0.182005	0.442495
chr17	8620370	8621351	78.5261	63.001	64.9921	76.1706	76.5429	73.8973	80.0088	68.4576	66.2005	69.1394	77.0484	77.1209	70.4702	73.5838	71.1349	78.2001	62.639	70.1118	74.346	76.6925	chr17	8619162	8621162	TTLL11	9.02591	1.39265	1.19763	3.55544	10.032	1.71994	2.12578	3.46358	2.00077	1.3767	11.3182	2.29386	1.48202	3.45438	3.77026	1.54865	2.37301	3.27673	5.408	5.24993	0.480387	0.0320436
chr17	8706185	8707461	5.12821	0.511945	1.86916	0.375	1.61154	2.58621	0.115207	0.943396	2.69131	0.934579	0.137363	4.20561	0.520833	1.13636	0	0.75	0	4.91803	0.309917	7.39437	chr17	8704671	8706671	MORN5	1.69236	0.183817	0	2.16841	11.1735	0.311251	1.12609	0.429788	0.227001	1.29611	11.9304	4.69614	0.601089	1.77496	11.4206	0.278203	1.50397	2.19509	0.995414	1.52513	-0.150848	0.525542
chr17	8706185	8707461	5.12821	0.511945	1.86916	0.375	1.61154	2.58621	0.115207	0.943396	2.69131	0.934579	0.137363	4.20561	0.520833	1.13636	0	0.75	0	4.91803	0.309917	7.39437	chr17	8704671	8706671	LHX6	1.65544	0	0.0968924	4.49646	5.44469	1.73367	1.25321	2.05801	0.327458	2.30854	4.7948	6.1656	0.178552	5.19548	0.0701888	1.15708	0.612396	3.60079	1.21883	1.17367	0.128844	0.588252
chr17	8731030	8735245	37.127	34.3018	49.7127	43.0782	48.2939	41.1702	38.3727	51.3201	43.2254	47.3652	45.1504	40.5298	36.2018	36.9228	35.7644	42.9618	45.3669	55.2019	53.0844	44.2803	chr17	8733371	8735371	MRRF	11.7419	9.19265	5.01474	7.87426	6.09118	8.30176	10.8195	6.6755	7.36324	5.7926	5.07506	8.47898	5.07842	11.7213	8.92638	3.94317	4.85113	5.32591	5.36736	4.69426	-0.634365	0.00266339
chr17	8731030	8735245	37.127	34.3018	49.7127	43.0782	48.2939	41.1702	38.3727	51.3201	43.2254	47.3652	45.1504	40.5298	36.2018	36.9228	35.7644	42.9618	45.3669	55.2019	53.0844	44.2803	chr17	8733371	8735371	RBM18	14.1636	8.18164	5.94198	12.0156	6.76379	7.45814	12.8357	13.6275	8.83756	5.15943	6.945	7.33324	4.5139	12.3209	6.68188	6.06562	6.65546	10.0252	6.25789	12.563	-0.0988876	0.678301
chr17	8760168	8763336	42.6859	41.869	43.8044	35.5062	43.8246	47.3709	39.3044	41.7391	38.6964	42.1487	44.7894	37.3716	36.4415	40.23	39.026	43.1004	51.973	49.437	41.069	39.7597	chr17	8760648	8762648	PTGS1	1.85798	1.30056	3.8566	15.6651	1.99094	5.47198	7.82606	5.47426	2.71003	23.8371	2.82591	7.3446	1.62977	5.83271	25.8237	4.02568	1.83248	13.7877	7.104	6.88972	-0.193392	0.413961
chr17	8760168	8763336	42.6859	41.869	43.8044	35.5062	43.8246	47.3709	39.3044	41.7391	38.6964	42.1487	44.7894	37.3716	36.4415	40.23	39.026	43.1004	51.973	49.437	41.069	39.7597	chr17	8760648	8762648	PDCL	18.308	23.115	10.8746	13.5284	42.1793	13.2648	18.972	14.8123	17.1702	10.5178	38.5765	13.5671	11.3567	21.2054	18.9564	12.3727	12.6564	17.356	21.0155	21.1836	0.0994709	0.676502
chr17	8806012	8807611	0.286435	0.0447756	0.543659	0.694445	0.776538	0.0397641	0.214028	0.114273	0.129354	0.0493827	0.221213	0.0890076	0.03885	0.149492	0.083566	0.108376	0.0952381	0.13093	0	1.06383	chr17	8806026	8808026	ZBTB6	3.48096	4.4407	3.33412	4.73951	7.23872	4.10702	4.94721	4.02735	6.96897	3.38864	5.32346	3.56721	6.88606	5.68579	7.50928	3.2475	4.02815	3.67134	4.38351	4.07218	0.0390358	0.870208
chr17	8818024	8818434	0	0.399543	0	0	0.735294	0	0	0	0.255102	2	0.980392	0	0	0.854701	0	0	0	0	0	0	chr17	8817024	8819024	RABGAP1	36.272	13.682	23.4108	22.0962	29.0001	18.8708	19.7778	16.9919	18.7551	16.0426	25.1765	18.1335	13.3391	25.6	19.3022	32.7255	16.8554	18.0747	21.6914	24.9017	-0.0387359	0.871197
chr17	8951108	8952818	22.0289	2.20999	2.36209	11.1031	4.62688	10.35	1.93157	7.76553	5.60921	0.405987	3.70766	12.6098	0.754219	10.4707	7.16388	11.5815	0.85353	11.3527	1.81335	11.1189	chr17	8952163	8954163	CRB2	2.04483	0.623664	0.888219	0.918035	1.63313	0.572166	13.8991	0.395336	0.861854	15.3709	2.76148	2.82883	1.03409	0.92455	0.694091	0.426483	3.86492	0.370471	9.74101	0.626507	-0.442776	0.0505728
chr17	8951108	8952818	22.0289	2.20999	2.36209	11.1031	4.62688	10.35	1.93157	7.76553	5.60921	0.405987	3.70766	12.6098	0.754219	10.4707	7.16388	11.5815	0.85353	11.3527	1.81335	11.1189	chr17	8952163	8954163	CRB2	4.24655	1.08144	1.01325	1.24098	0.572143	0.881399	1.02408	0.931778	1.68612	2.66089	0.872814	1.09755	0.541672	1.38675	1.09969	0.678871	0.986745	0.701969	1.7248	2.16326	0.450637	0.046149
chr17	9223404	9232535	24.6225	13.642	26.2359	36.7506	30.517	17.7762	20.5947	33.9062	21.1733	22.3942	30.3275	18.9903	14.9705	29.2662	20.8837	32.914	23.5007	35.5078	18.8724	31.9901	chr17	9222056	9224056	LHX2	0.0782459	1.08999	0.0594934	0	1.73167	0.0552157	0.0729067	0	0	0.127204	1.86132	0.0743044	0.0643682	0	0	0	0	0	2.81181	0.466731	-0.103376	0.664501
chr17	9403082	9404266	24.9509	32.5199	56.3243	30.4357	54.6527	29.6658	34.3993	48.9207	46.8539	37.9783	54.7993	40.1481	39.4662	44.5838	27.6181	37.191	49.1179	39.1456	41.3431	43.6529	chr17	9401465	9403465	GPR144	0.0307625	0.0810185	0.461121	0.489093	1.23651	0.349151	0.486633	0.188215	1.48371	4.37391	1.055	0.461107	0.0474819	0.100418	0	0.275362	0.144582	0.661713	0.578718	0.157524	0.148693	0.531543
chr17	9403082	9404266	24.9509	32.5199	56.3243	30.4357	54.6527	29.6658	34.3993	48.9207	46.8539	37.9783	54.7993	40.1481	39.4662	44.5838	27.6181	37.191	49.1179	39.1456	41.3431	43.6529	chr17	9401465	9403465	GPR144	0	0.206283	0.099423	0	0	0	0.764363	0.0854086	0.0632314	0	0	0	0	0	0	0	0	0.341269	0	0	-0.135671	0.568461
chr17	9595564	9599493	0	1.45386	2.40104	0.13587	2.77778	0.127539	2.12669	0.00582751	9.35812	2	4.89549	0	7.24965	2.72727	4.60526	0.100402	0	0.0534759	5.60355	2.55747	chr17	9596359	9598359	GAPVD1	14.555	13.0994	11.4765	7.93796	8.32228	7.4782	9.16674	9.63878	11.5646	15.2993	8.41179	8.81683	8.55585	12.0029	11.1816	5.19348	10.4728	9.71589	8.73721	14.8441	0.0594482	0.803391
chr17	9634081	9641573	62.9354	48.4998	58.9907	59.509	45.1631	49.7156	54.7691	57.397	43.6215	48.437	62.175	46.4599	49.6015	49.9016	58.2202	54.7016	52.4291	55.3265	48.7327	50.7711	chr17	9638243	9640243	MAPKAP1	27.1673	11.0496	12.5528	14.7233	10.8907	21.0836	18.158	13.4614	14.8473	18.4912	12.8835	10.5076	11.8261	16.5118	45.1051	8.94138	16.2016	16.0964	13.3838	9.10851	0.353002	0.126846
chr17	9725466	9729579	4.89189	2.97899	2.43347	4.32963	7.80453	0.00980392	7.27076	5.39612	3.88268	7.50916	12.7181	4.08298	3.57401	7.30555	5.47721	5.51948	0.154864	6.51769	12.9172	2.05696	chr17	9726713	9728713	PBX3	5.86027	7.00908	4.25249	5.0211	12.2623	17.7959	9.82264	2.98631	3.97098	10.7799	13.2458	7.23196	5.93813	4.17713	23.7859	3.94818	2.58829	4.53847	8.4983	5.70272	0.180957	0.44517
chr17	9725466	9729579	4.89189	2.97899	2.43347	4.32963	7.80453	0.00980392	7.27076	5.39612	3.88268	7.50916	12.7181	4.08298	3.57401	7.30555	5.47721	5.51948	0.154864	6.51769	12.9172	2.05696	chr17	9726713	9728713	PBX3	0.566126	0.46228	0.697899	0.15111	0.405244	1.25105	0.635582	0.150316	0.217323	2.65747	0.883538	1.27446	0.789254	0	1.01367	1.18227	0.186302	0.475978	0.502542	0.441062	0.0855307	0.719944
chr17	9962885	9963991	0.12987	0.407383	0	2.56151	6.10119	0.833333	1.11759	0.469484	5.83599	12.8791	10	4.41712	1.25	0.384615	0	0	0.285714	1.66667	7.16554	6.80952	chr17	9961125	9963125	FAM125B	24.6387	2.61212	8.41842	7.75261	9.5367	4.81011	4.26414	2.72353	6.00591	5.47245	11.9593	5.91854	5.30025	7.68123	3.21883	2.39689	4.62446	4.87434	5.97235	6.67362	0.0877418	0.712994
chr17	9962885	9963991	0.12987	0.407383	0	2.56151	6.10119	0.833333	1.11759	0.469484	5.83599	12.8791	10	4.41712	1.25	0.384615	0	0	0.285714	1.66667	7.16554	6.80952	chr17	9961125	9963125	NRON	0.842143	0.549432	1.70407	0.300394	0.170326	0.379107	0.168364	0.21859	0.468943	0.715347	0.646825	0.214323	0.94515	0.205929	0.266072	0.143724	0.180296	0.184663	0.584839	0.504834	0.076633	0.74812
chr17	10050322	10060575	11.4507	10.168	16.628	17.1593	14.7845	10.7081	11.3316	28.4825	19.0539	16.2018	13.1982	16.6439	19.6258	14.1677	10.728	30.1014	15.7479	33.4479	27.3473	14.5487	chr17	10057277	10059277	LMX1B	0	0	0	0.0385796	0.0605959	0.0930373	0.203774	1.3364	0	0.0303248	0.0360457	0.0298179	1.27308	0.0754084	0	1.71189	0	0.324438	3.75659	3.25155	0.463196	0.0397067
chr17	10050322	10060575	11.4507	10.168	16.628	17.1593	14.7845	10.7081	11.3316	28.4825	19.0539	16.2018	13.1982	16.6439	19.6258	14.1677	10.728	30.1014	15.7479	33.4479	27.3473	14.5487	chr17	10050536	10052536	ALC	0	0	0	0	0	0	0	0	0	0	0	0	0	0	0	7.06927	0	0	2.24753	0	0.51454	0.0202737
chr17	10050322	10060575	11.4507	10.168	16.628	17.1593	14.7845	10.7081	11.3316	28.4825	19.0539	16.2018	13.1982	16.6439	19.6258	14.1677	10.728	30.1014	15.7479	33.4479	27.3473	14.5487	chr17	10057277	10059277	LMX1B	0.0266629	0	0.0507374	0	0.021319	0.0861793	0	0.429497	0.0266505	0	0.0188943	0.0150237	0.216992	0.0219248	0	0.870034	0	0.126829	0.940423	1.41733	0.419971	0.0652494
chr17	10050322	10060575	11.4507	10.168	16.628	17.1593	14.7845	10.7081	11.3316	28.4825	19.0539	16.2018	13.1982	16.6439	19.6258	14.1677	10.728	30.1014	15.7479	33.4479	27.3473	14.5487	chr17	10057277	10059277	LMX1B	0	0	0.0477118	0	0.0601237	0.097155	0.0190598	0.526622	0.0214777	0	0.0118537	0.00942187	0.235864	0.020648	0	1.73805	0.0137652	0.142768	1.2473	1.64056	0.494641	0.0266126
chr17	10276481	10277720	0.307019	1.90154	0.240552	0.0276361	0.141025	1.32187	0.229874	2.40723	2.14526	0.238095	0.144771	0.146345	0.356734	0.924479	0.0281134	0.0685143	0.151587	0.402837	1.10793	0.320587	chr17	10274953	10276953	RALGPS1	10.0926	10.54	4.24892	6.32157	15.1815	10.0896	2.84753	3.43314	9.06723	2.5867	13.6742	5.58207	8.16179	8.52969	18.2566	8.618	6.17902	7.14785	10.3948	13.8459	-0.115963	0.626359
chr17	10276481	10277720	0.307019	1.90154	0.240552	0.0276361	0.141025	1.32187	0.229874	2.40723	2.14526	0.238095	0.144771	0.146345	0.356734	0.924479	0.0281134	0.0685143	0.151587	0.402837	1.10793	0.320587	chr17	10274953	10276953	ANGPTL2	4.83225	1.56117	1.04527	16.9743	1.20062	6.93405	4.57778	14.0749	4.04877	4.4669	1.09658	6.34607	0.847127	11.5754	2.08334	4.01741	5.29862	15.7207	3.59001	14.4299	0.115405	0.628031
chr18	1012120	1013083	0.144213	0.52191	0	0.851767	0.934579	0.42735	0.282738	2.1978	0.401039	0.623308	0.881042	0.0270416	2.21273	0.842582	2.33772	0.0349024	0.592172	0.769231	0.891662	1.08696	chr18	1010321	1012321	ELAC2	7.08163	5.15982	3.77064	5.1451	4.21584	3.39755	4.79998	2.82212	4.3373	2.38672	4.00881	3.19842	2.99396	3.24625	2.6873	3.32149	2.4665	2.78549	2.94106	3.52373	-0.385626	0.0931125
chr18	2009152	2023817	12.0063	6.63663	9.01197	12.1129	18.3189	16.4542	5.46072	11.2935	9.48122	18.0869	19.6925	15.8486	10.1992	9.35561	18.816	7.23702	14.9437	9.93716	17.2063	10.948	chr18	2018995	2020995	NTN1	0.49905	0	1.4875	1.12835	1.37805	0.711891	4.9786	1.26578	0.0987543	4.97949	0.900817	1.83606	1.55557	1.86613	4.44516	0.215272	0	1.78572	1.34573	0.496178	0.17377	0.46375
chr18	2154966	2155492	26.6667	4.90811	17.7083	18.1477	11.1029	15.2299	7.13141	13.3333	23.0764	19.439	10.9816	29.0236	6.2212	15.5482	4.16667	33.5096	15.3448	4.88889	3.71469	15.5078	chr18	2153415	2155415	CFAP52	0	0	0.016718	0	2.58975	0.0403021	0.0959486	0.0138097	0.0805189	0.0138273	2.4529	0.0115002	0.59495	0	5.02554	0.0957956	0.888542	0	0.496191	0.0517407	-0.381475	0.0969935
chr18	2204410	2211114	13.1411	14.8102	17.3792	15.3606	10.957	11.9619	13.6578	16.8536	18.3914	19.5	12.3234	19.0241	12.7632	20.2478	14.9226	14.5459	19.9815	22.6546	20.345	24.4487	chr18	2208820	2210820	ENSGALG00000001323	0	0.0452358	0	0	0.0595837	0	0.0147434	0	0	0	0.017616	0	0.123945	0	0.0340468	0	0	0	0.044064	0	-0.407329	0.0746567
chr18	2223145	2223739	0.123913	0	0.0334225	0	0.0840054	0	0.0270563	0	0	0.0907598	0.139112	0.104422	0.0478927	0	0.104908	0.0294724	0.10706	0.0480192	0.102942	0	chr18	2221388	2223388	FAM18B1	40.1223	52.039	10.5218	27.9168	17.4429	20.2462	27.6987	22.0699	18.4761	14.2441	18.7725	13.763	17.2479	19.3698	40.9674	26.3981	17.4342	15.0194	17.1217	17.2841	-0.0554025	0.816545
chr18	3444656	3451941	0.0412768	0.0143349	0.00570776	0.138001	0.0373253	0	0.0426294	2.70315	2.66776	0.0369571	0.0426384	2.4396	0.0142692	0.0580187	0.0189753	0.234906	0	0.528725	0.140968	1.92954	chr18	3449735	3451735	NARF	9.12626	4.88708	6.52251	3.03271	1.43991	1.19173	0.574948	0.744139	2.79392	0.563418	1.15057	1.73077	1.32921	3.69534	3.98849	0.146397	0.343153	1.62112	1.20997	2.65577	-0.135988	0.567549
chr18	3444656	3451941	0.0412768	0.0143349	0.00570776	0.138001	0.0373253	0	0.0426294	2.70315	2.66776	0.0369571	0.0426384	2.4396	0.0142692	0.0580187	0.0189753	0.234906	0	0.528725	0.140968	1.92954	chr18	3449735	3451735	NARF	32.64	15.915	30.2664	14.7051	7.00221	3.5551	4.11987	3.7678	13.2926	1.88806	6.6311	8.79544	4.44113	16.1891	16.4183	1.81914	2.08163	5.24478	8.18186	5.88156	-0.144885	0.542223
chr18	4051508	4052307	12.2043	5.1761	0.70922	6.42022	9.11565	0	2.90476	6.45833	2.84679	3.46624	6.37019	4.59783	4.41176	11.5352	0	10.0134	2.72436	3.38983	5.27553	5.21037	chr18	4051890	4053890	SEC14L1	7.78279	7.17941	18.9952	9.07663	21.377	6.4752	12.2745	11.0749	17.5641	22.8736	21.2099	17.749	7.75698	11.1342	9.57216	5.15827	6.7822	9.77838	10.2719	11.4217	-0.083235	0.727182
chr18	4215643	4222916	0.00630438	0.00328731	0.682716	0.44989	0.348448	0.491542	0.665414	0.369923	0.33959	1.28066	0.378663	0.744766	0.263158	2.01431	0.902196	0.148073	0.549409	0.0151515	0.156841	0.337838	chr18	4220670	4222670	JMJD6	77.9385	3.71426	6.9437	25.6225	4.05176	3.1886	8.07999	2.57131	5.78327	4.52503	5.40975	5.52662	3.31971	10.197	3.43175	2.3084	7.56005	4.12652	4.92089	2.94417	-0.174673	0.461394
chr18	4233805	4236273	4.51085	5.7212	0.734451	0.760563	2.88208	1.46684	0.308224	0.59253	4.73267	0.225225	4.7526	0.215122	1.76918	1.50538	3.1882	2.95031	0.513196	0.94246	0.0393507	3.04202	chr18	4233680	4235680	MXRA7	6.63118	3.79267	7.38669	43.6895	13.764	69.2059	114.842	33.7867	15.2357	96.6509	13.1399	30.4758	8.99086	51.8861	4.80556	5.07968	15.7796	82.0994	45.8829	44.5895	-0.572963	0.00827453
chr18	4283475	4284254	3.87781	0.545834	3.72617	0.757576	4.07799	2.5398	1.50876	2.28045	2.87843	1.51515	2.29013	2.84091	2.11139	4.15273	1.27869	1.64149	9.20396	3.33839	3.125	0	chr18	4281523	4283523	ST6GALNAC2	0.582174	14.6494	0.97414	2.28106	4.26642	5.28943	2.05897	4.16434	2.09888	0.645031	3.83494	2.01504	2.9166	0.826317	0.881709	0.802515	1.35529	6.41598	3.23774	2.93385	-0.259635	0.268964
chr18	4283475	4284254	3.87781	0.545834	3.72617	0.757576	4.07799	2.5398	1.50876	2.28045	2.87843	1.51515	2.29013	2.84091	2.11139	4.15273	1.27869	1.64149	9.20396	3.33839	3.125	0	chr18	4281523	4283523	ENSGALG00000001886	10.9942	11.0714	8.05555	16.3006	7.66714	15.1997	10.1223	5.07929	8.85491	7.29214	4.14508	5.15234	9.53262	7.74774	5.47256	2.39143	11.0434	12.7049	5.33353	2.93701	0.168412	0.477853
chr18	4348972	4354963	10.3998	12.1639	17.1269	12.9367	24.0568	18.1917	14.1443	17.1032	23.0335	20.8021	17.8693	12.9814	10.7446	12.6687	14.9593	17.7848	26.0481	23.5294	12.5995	9.94986	chr18	4351781	4353781	UBE2O	19.0047	14.6955	9.08686	7.91376	29.1356	8.67958	12.5248	5.78417	7.13333	6.02682	22.3237	8.05914	8.19465	12.2145	8.27657	26.5308	8.64233	5.25547	8.02172	3.89221	0.121912	0.608639
chr18	4512024	4512589	0	0	0.250627	0.0398724	0	0	0	0	0	0.0422833	0	0	0	0	0	0	0	0.680272	0.0471698	0	chr18	4510256	4512256	SRP68	17.0615	19.0941	12.1762	10.4153	14.5168	13.0845	19.1266	11.8276	11.5091	10.4046	12.155	12.442	9.7441	17.633	14.7397	18.2628	9.85699	10.9853	9.12485	8.52284	-0.2052	0.38546
chr18	4680291	4682067	0.0263158	0.0316487	0	0.17316	0	0.21097	1.08911	0	0.473485	0.0227998	0	0.130046	0	0.0362046	0	0.110617	0.0793085	0.0457876	0.0723711	0.0791001	chr18	4681599	4683599	ENSGALG00000002290	0.121289	0	0	0	0	2.60516	0.336077	0	0.0452518	0	0	0.352767	0.130603	0	0.575364	0.262828	1.59962	0.070078	0.0633627	0	0.113352	0.6342
chr18	4689490	4690956	6.95122	3.03442	2.19907	0.889328	11.8184	3.80435	6.62616	3.75	7.15957	15.1409	16.638	3.28054	0.869565	2.92104	6.23496	3.99317	1.17481	6.2601	6.53124	0.650407	chr18	4688305	4690305	GALK1	0.32268	14.7479	1.56258	1.29674	1.17704	5.31	2.70285	3.89161	2.06788	2.264	0.873849	3.11199	11.4044	1.69033	4.85845	2.5821	4.0608	3.61568	2.22448	3.92493	-0.37476	0.103518
chr18	4689490	4690956	6.95122	3.03442	2.19907	0.889328	11.8184	3.80435	6.62616	3.75	7.15957	15.1409	16.638	3.28054	0.869565	2.92104	6.23496	3.99317	1.17481	6.2601	6.53124	0.650407	chr18	4688305	4690305	ITGB4	0.445445	1.92302	0.484111	1.01344	0.427798	13.6919	3.23551	12.8048	1.07993	4.74944	0.713315	2.87324	3.61793	0.529454	7.56061	1.25347	9.35548	7.65313	5.28645	7.93042	-0.229053	0.331351
chr18	4814764	4815660	0.0519183	0	0	0.0305998	0.022604	0	0	0	0.0231428	0.0270746	0	0	0	0.099552	0	0	0	0.042735	0.0362605	0.0324675	chr18	4812940	4814940	CSNK1D	8.82917	10.9782	7.01551	8.42218	12.0907	11.4142	10.4418	12.9212	11.3292	9.69444	11.1303	9.09534	6.50679	12.8542	10.411	7.12244	8.12681	10.9609	8.62424	14.4746	0.317674	0.172294
chr18	4814764	4815660	0.0519183	0	0	0.0305998	0.022604	0	0	0	0.0231428	0.0270746	0	0	0	0.099552	0	0	0	0.042735	0.0362605	0.0324675	chr18	4812940	4814940	SLC16A3	4.27235	0.128481	13.8284	1.75939	6.95653	0.651853	0.365986	2.08535	1.05263	0.679023	5.69225	0.784761	0.233523	1.05398	0.708555	0.3053	3.24517	0.843817	12.7373	1.161	0.0221166	0.92626
chr18	5033332	5038874	38.41	50.7888	54.3388	48.1719	51.2608	44.6329	48.1765	46.7741	51.393	50.2795	51.634	44.9865	49.9173	52.2408	46.5757	42.4963	50.741	42.951	49.5172	50.0988	chr18	5034578	5036578	ENSGALG00000002923	2.76111	3.9965	5.79077	18.0539	11.4961	20.5145	17.0572	20.7398	2.18404	1.99426	9.27531	5.20177	2.01937	1.95013	6.7441	29.778	5.86432	11.0044	5.01112	6.68757	-0.389844	0.0892877
chr18	5033332	5038874	38.41	50.7888	54.3388	48.1719	51.2608	44.6329	48.1765	46.7741	51.393	50.2795	51.634	44.9865	49.9173	52.2408	46.5757	42.4963	50.741	42.951	49.5172	50.0988	chr18	5036159	5038159	NME2	277.658	659.648	385.01	539.406	325.919	523.301	991.144	522.542	557.83	473.572	324.578	368.496	433.52	462.202	472.393	1129.58	172.208	447.783	200.399	263.82	-0.226614	0.336667
chr18	5033332	5038874	38.41	50.7888	54.3388	48.1719	51.2608	44.6329	48.1765	46.7741	51.393	50.2795	51.634	44.9865	49.9173	52.2408	46.5757	42.4963	50.741	42.951	49.5172	50.0988	chr18	5038421	5040421	MBTD1	10.3199	18.6888	6.55691	5.67602	6.04611	7.2298	5.16754	7.51926	10.5803	5.31054	4.45334	5.40344	5.42086	6.30039	15.1775	6.72371	6.85992	6.82827	5.43879	10.6966	-0.065861	0.782645
chr18	5069060	5071135	0.0442263	0	0.603112	0	0.116579	0.0390816	0.06977	0.544339	0.0584795	0.0633843	0.075999	0.744048	0.0703858	0.114392	0.0361135	0.140334	0.0926294	0.0618732	0.237209	0.0362582	chr18	5068323	5070323	UTP18	3.09048	6.07393	2.65611	2.84474	3.28117	2.77048	4.33355	3.17946	3.95431	2.24603	4.03251	2.65382	2.53205	2.87321	3.56096	1.857	1.95935	2.58239	1.61999	2.80239	-0.232498	0.323928
chr18	5786334	5787536	14.834	2.06231	6.44787	5.75731	3.54483	1.81419	1.15554	8.91	1.30394	12.8743	1.97327	2.87658	2.17385	3.39733	2.65619	1.8559	4.44759	6.0585	6.43148	4.65807	chr18	5784828	5786828	TOM1L1	1.35397	0.165193	0	0.763493	0.173499	0.52325	3.51429	7.48863	0.306384	1.01378	0.276048	2.97707	6.83441	0.521207	13.3638	2.03028	3.04985	4.77238	1.66771	6.70937	-0.0558816	0.814984
chr18	5786334	5787536	14.834	2.06231	6.44787	5.75731	3.54483	1.81419	1.15554	8.91	1.30394	12.8743	1.97327	2.87658	2.17385	3.39733	2.65619	1.8559	4.44759	6.0585	6.43148	4.65807	chr18	5784828	5786828	COX11	4.15294	3.01891	0.696436	2.61436	2.8995	1.63794	3.15503	3.50702	1.94684	1.40515	2.56816	2.28064	4.52755	4.37184	5.85159	2.79683	1.74258	2.98232	2.13455	6.58667	-0.0616026	0.796406
chr18	5810205	5811685	0.251574	0.595546	0.0703565	0.0221935	0.0910834	0.181802	0	0.0807474	0.0577201	0.282162	0.2618	0.683198	0.237719	0.407509	0.386748	0.182186	0.349889	0	0.0330292	0.717547	chr18	5808992	5810992	STXBP4	1.22119	1.42202	1.3227	2.40608	16.8725	2.57375	7.05397	2.59938	1.60229	7.63483	15.8818	4.09627	10.7224	3.22251	4.90417	6.30432	4.52416	4.97471	14.7184	2.33637	-0.243849	0.300178
chr18	5810205	5811685	0.251574	0.595546	0.0703565	0.0221935	0.0910834	0.181802	0	0.0807474	0.0577201	0.282162	0.2618	0.683198	0.237719	0.407509	0.386748	0.182186	0.349889	0	0.0330292	0.717547	chr18	5808992	5810992	STXBP4	0.237276	0.479579	0.238157	0.242342	1.18052	0.228802	0.519712	0.715253	0.512058	1.16328	1.45827	0.736101	3.46736	0.101218	0.517812	0.637102	0.488015	0.454791	2.83143	0.838938	-0.0836986	0.725719
[truncated: 2,062 more rows]
